# Supplementary material for: Individual and demographic responses of the palm Brahea aculeata to browsing and leaf harvesting in a tropical dry forest of Northwestern Mexico
Source: PeerJ. 2025 Jun 5;13:e19266. doi: 10.7717/peerj.19266 (PMC12145777; doi:10.7717/peerj.19266)
Supplement: Supplemental Information 1 [file peerj-13-19266-s001.xlsx]

## Sheet: Sheet1
Data for the manuscript "Individual and demographic responses of the threatened Brahea aculeata palm to browsing and leaf harvesting in a tropical dry forest of Northwestern Mexico "
Macedo-Santana et al
Location			Leaf-harvesting								Survival status				Recruitment (1 = new individual)			Mortality				Stem lenght				Growth Stem Length			Log Stem lenght				Growth log stem lenght			Stem lenght category				Petiole				Blade				Harvested leaves
XY_ID	Unique-ID	Plot	yr11	yr12	yr13	yr14	tag	Tag.	browsing	leaf-harvesting	Status11	Status12	Status13	Status14	Recruitment12	Recruitment13	Recruitment14	yr11	yr12	yr13	yr14	SL11	SL12	SL13	SL14	GSL11-12	GSL12-13	GSL13-14	LSL11	LSL12	LSL13	LSL14	Growth11-12	Growth12-13	Growth13-14	cat11	cat12	cat13	cat14	Petiole11	Petiole12	Petiole13	Petiole14	Blade11	Blade12	Blade13	Blade14	HL11	HL12
722356.05-2994660.91	5UG-LH5311	5UG-LH	2011	2012	2013	2014	5311	5311	SP	CB	Alive	Alive	Alive	Alive				0	0	0	0	415	408	410	410	-7	2	0	2.61909	2.61172	2.61384	2.61384	-0.00737002	0.00211851	0	4	4	4	4	65	40	51	62	60	55	60	62	7	5
722314.28-2994671.41	5UG-LH5285	5UG-LH	2011	2012	2013	2014	5285	5285	SP	CB	Alive	Alive	Alive	Alive				0	0	0	0	266	266	262	270	0	-4	8	2.42651	2.42651	2.41996	2.43297	0	-0.00655551	0.0130135	4	4	4	4	68	52	55	64	0	54	68	61	7	8
722284.37-2994667.07	6UG-UH5202	6UG-UH	2011	2012	2013	2014	5202	5202	SP	SC	Alive	Alive	Alive	Alive				0	0	0	0	308	310	310	320	2	0	10	2.48996	2.49276	2.49276	2.50651	0.00280191	0	0.0137446	4	4	4	4	53	52	54	57	57	32	77	62	0	0
722290.29-2994646.18	6UG-UH5017	6UG-UH	2011	2012	2013	2014	5017	5017	SP	SC	Alive	Alive	Alive	Alive				0	0	0	0	206	207	223	230	1	16	7	2.31597	2.31806	2.35025	2.36361	0.00209299	0.0321847	0.013364	3	3	3	3	47	50	95	90	64	48	60	70	0	0
722338.42-2994655.25	5UG-LH5065	5UG-LH	2011	2012	2013	2014	5065	5065	SP	CB	Alive	Alive	Alive	Alive				0	0	0	0	195	190	180	197	-5	-10	17	2.29226	2.28103	2.25768	2.29667	-0.0112227	-0.0233548	0.0389866	3	3	3	3	56	38	43	40	55	39	56	52	4	5
722334.49-2994664.06	5UG-LH5067	5UG-LH	2011	2012	2013	2014	5067	5067	SP	CB	Alive	Alive	Alive	Alive				0	0	0	0	230	227	237	237	-3	10	0	2.36361	2.35793	2.37658	2.37658	-0.00567713	0.0186421	0	3	3	3	3	59	27	54	40	69	59	67	63	8	8
722306.16-2994654.87	6UG-UH5083	6UG-UH	2011	2012	2013	2014	5083	5083	SP	SC	Alive	Alive	Alive	Alive				0	0	0	0	330	352	351	360	22	-1	9	2.51983	2.54777	2.54654	2.55751	0.0279467	-0.00123204	0.0109645	4	4	4	4	56	32	50	60	60	50	54	58	0	0
722276.85-2994662.10	6UG-UH5133	6UG-UH	2011	2012	2013	2014	5133	5133	SP	SC	Alive	Alive	Alive	Alive				0	0	0	0	120	125	134	134	5	9	0	2.08279	2.10037	2.13033	2.13033	0.0175852	0.0299632	0	3	3	3	3	38	66	68	56	52	60	56	62	0	0
722283.52-2994664.87	6UG-UH5207	6UG-UH	2011	2012	2013	2014	5207	5207	SP	SC	Alive	Alive	Alive	Alive				0	0	0	0	256	253	273	267	-3	20	-6	2.40993	2.40483	2.43775	2.42813	-0.00509941	0.0329168	-0.00961577	4	4	4	4	40	63	64	68	50	55	63	60	0	0
722287.10-2994642.17	6UG-UH5251	6UG-UH	2011	2012	2013	2014	5251	5251	SP	SC	Alive	Alive	Alive	Alive				0	0	0	0	405	410	413	420	5	3	7	2.60853	2.61384	2.617	2.62428	0.00531579	0.00315852	0.00728175	4	4	4	4	70	58	70	60	60	45	76	50	0	0
722372.77-2994676.74	4UG-HH5424	4UG-HH	2011	2012	2013	2014	5424	5424	SP	CA	Alive	Alive	Alive	Alive				0	0	0	0	302	314	314	330	12	0	16	2.48144	2.49831	2.49831	2.51983	0.0168679	0	0.0215174	4	4	4	4	42	28	39	50	66	40	60	55	13	9
722375.19-2994687.25	4UG-HH5434	4UG-HH	2011	2012	2013	2014	5434	5434	SP	CA	Alive	Alive	Alive	Alive				0	0	0	0	420	425	432	448	5	7	16	2.62428	2.62941	2.63649	2.65225	0.0051275	0.0070783	0.0157584	4	4	4	4	75	32	60	79	61	58	62	60	22	15
722515.84-2994949.05	1G-UH5799	1G-UH	2011	2012	2013	2014	5799	5799	CP	SC	Alive	Alive	Alive	Alive				0	0	0	0	265	255	250	270	-10	-5	20	2.42488	2.40824	2.39967	2.43297	-0.0166417	-0.00856624	0.0332956	4	4	4	4	65	56	60	70	59	56	70	65	0	0
722525.26-2994995.71	2G-HH6360	2G-HH	2011	2012	2013	2014	6360	6360	CP	CA	Alive	Alive	Alive	Alive				0	0	0	0			381	381			0			2.58206	2.58206			0			4	4	60	55	45	30	70	63	52	75	0	17
722556.90-2995061.24	3G-LH96	3G-LH	2011	2012	2013		96	-1	CP	CB	Alive	Alive	Alive					0	0	0		30	23	22		-7	-1		1.49136	1.38021	1.36173		-0.11115	-0.0184834		2	2	2		34	59	51	0	50	44	43		0	3
722504.49-2994984.40	2G-HH6474	2G-HH	2011	2012	2013	2014	6474	6474	CP	CA	Alive	Alive	Alive	Alive				0	0	0	0	229	230	229	235	1	-1	6	2.36173	2.36361	2.36173	2.37291	0.00188414	-0.00188414	0.0111842	3	3	3	3	65	40	45	36	65	48	56	51	13	9
722542.94-2995059.66	3G-LH100	3G-LH	2011	2012	2013	2014	100	-1	CP	CB	Alive	Dead	Dead	Dead				0	1			1							0.30103							1				2.5				27				0
722548.51-2995059.31	3G-LH102	3G-LH	2011	2012	2013	2014	102	-1	CP	CB	Alive	Dead	Dead	Dead				0	1			1							0.30103							1				3.5				33				0
722351.07-2994659.83	5UG-LH5309	5UG-LH	2011	2012	2013	2014	5309	5309	SP	CB	Alive	Alive	Alive	Alive				0	0	0	0	202	206	208	210	4	2	2	2.3075	2.31597	2.32015	2.32428	0.00847431	0.00417594	0.00413617	3	3	3	3	68	50	56	51	57	52	55	53	5	8
722519.11-2994976.12	2G-HH6485	2G-HH	2011	2012	2013	2014	6485	6485	CP	CA	Alive	Alive	Alive	Alive				0	0	0	0	370	383	382	399	13	-1	17	2.56937	2.58433	2.5832	2.60206	0.0149573	-0.00113245	0.0188612	4	4	4	4	60	57	67	44	62	72	64	62	28	20
722298.21-2994671.86	6UG-UH5107	6UG-UH	2011	2012	2013	2014	5107	5107	SP	SC	Alive	Alive	Alive	Alive				0	0	0	0	198	218	220	220	20	2	0	2.29885	2.34044	2.34439	2.34439	0.041591	0.00394816	0	3	3	3	3	55	44	64	60	75	66	67	60	0	0
722386.41-2994665.55	4UG-HH5466	4UG-HH	2011	2012	2013	2014	5466	5466	SP	CA	Alive	Alive	Alive	Alive				0	0	0	0	140	130	144	140	-10	14	-4	2.14922	2.11727	2.16137	2.14922	-0.0319478	0.0440967	-0.0121489	3	3	3	3	39	33	41	58	57	56	49	58	6	6
722546.07-2995066.20	3G-LH114	3G-LH	2011	2012	2013	2014	114	-1	CP	CB	Alive	Dead	Dead	Dead				0	1			1							0.30103							1				1				23				0
722535.35-2994998.50	2G-HH6340	2G-HH	2011	2012	2013	2014	6340	6340	CP	CA	Alive	Alive	Alive	Alive				0	0	0	0	9	9	8	8	0	-1	0	1	1	0.954243	0.954243	0	-0.0457575	0	1	1	1	1	20	25	20	16	30	33	37	29	0	0
722539.60-2994971.77	2G-HH6494	2G-HH	2011	2012	2013	2014	6494	6494	CP	CA	Alive	Alive	Dead	Dead				0	0	1		380	387			7			2.58092	2.58883			0.00790675			4	4			55	35			59	55			12	9
722538.00-2994973.49	2G-HH6500	2G-HH	2011	2012	2013	2014	6500	6500	CP	CA	Alive	Alive	Alive	Alive				0	0	0	0	620	628	632	633	8	4	1	2.79309	2.79865	2.8014	2.80209	0.00555905	0.00275306	0.000685548	4	4	4	4		70	99	41		67	60	59	0	31
722333.98-2994665.87	5UG-LH5068	5UG-LH	2011	2012	2013	2014	5068	5068	SP	CB	Alive	Alive	Alive	Alive				0	0	0	0	139	141	142	144	2	1	2	2.14613	2.15229	2.15534	2.16137	0.00616031	0.00304769	0.00603196	3	3	3	3	48	44	41	40	49	49	53	49	9	7
722381.34-2994677.99	4UG-HH5443	4UG-HH	2011	2012	2013	2014	5443	5443	SP	CA	Alive	Alive	Alive	Alive				0	0	0	0	250	250	254	254	0	4	0	2.39967	2.39967	2.40654	2.40654	0	0.00686646	0	4	4	4	4	59	70	49	54	68	62	69	58	18	13
722340.66-2994662.51	5UG-LH5592	5UG-LH	2011	2012	2013	2014	5592	5592	SP	CB	Alive	Alive	Alive	Alive				0	0	0	0	220	217	235	240	-3	18	5	2.34439	2.33846	2.37291	2.38202	-0.00593578	0.0344555	0.00910504	3	3	3	3	83	50	50	50	71	63	70	68	14	13
722496.77-2994962.87	1G-UH5986	1G-UH	2011	2012	2013	2014	5986	5986	CP	SC	Alive	Alive	Alive	Alive				0	0	0	0	136	136	145	150	0	9	5	2.13672	2.13672	2.16435	2.17898	0	0.0276323	0.0146241	3	3	3	3		19	56	53		49	50	55	0	0
722284.13-2994666.01	6UG-UH5210	6UG-UH	2011	2012	2013	2014	5210	5210	SP	SC	Alive	Alive	Alive	Alive				0	0	0	0	205	216	216	218	11	0	2	2.31387	2.33646	2.33646	2.34044	0.0225925	0	0.00398438	3	3	3	3	47	50	54	45	57	57	66	42	0	0
722397.25-2994679.81	4UG-HH5617	4UG-HH	2011	2012	2013	2014	5617	5617	SP	CA	Alive	Alive	Alive	Alive				0	0	0	0	210	209	209	222	-1	0	13	2.32428	2.32222	2.32222	2.3483	-0.00206316	0	0.0260856	3	3	3	3	55	55	59	50	60	67	70	70	15	10
722546.78-2995066.46	3G-LH162	3G-LH	2011	2012	2013	2014	162	-1	CP	CB	Alive	Dead	Dead	Dead				0	1			146							2.16732							3				30				52				2
722278.70-2994670.65	6UG-UH5217	6UG-UH	2011	2012	2013	2014	5217	5217	SP	SC	Alive	Alive	Alive	Alive				0	0	0	0	106	100	103	115	-6	3	12	2.02938	2.00432	2.01703	2.06446	-0.0250624	0.012712	0.0474246	3	3	3	3	40	45	72	60	62	67	77	70	0	0
722377.00-2994685.80	4UG-HH5437	4UG-HH	2011	2012	2013	2014	5437	5437	SP	CA	Alive	Alive	Alive	Alive				0	0	0	0	245	252	252	263	7	0	11	2.39094	2.40312	2.40312	2.4216	0.0121854	0	0.0184834	3	4	4	4	78	42	55	32	75	49	59	49	17	11
722272.35-2994671.07	6UG-UH5236	6UG-UH	2011	2012	2013	2014	5236	5236	SP	SC	Alive	Alive	Alive	Alive				0	0	0	0	6	2	4	3	-4	2	-1	0.845098	0.477121	0.69897	0.60206	-0.367977	0.221849	-0.09691	1	1	1	1	54	9	35	37		53	57	57	0	0
722268.41-2994672.74	6UG-UH5237	6UG-UH	2011	2012	2013	2014	5237	5237	SP	SC	Alive	Alive	Alive	Alive				0	0	0	0	16	19	17	21	3	-2	4	1.23045	1.30103	1.25527	1.34242	0.0705811	-0.0457575	0.0871502	2	2	2	2	28	23	13	20	40	42	48	35	0	0
722273.16-2994635.29	6UG-UH5089	6UG-UH	2011	2012	2013	2014	5089	5089	SP	SC	Alive	Alive	Alive	Alive				0	0	0	0	78	75	80	80	-3	5	0	1.89763	1.88081	1.90849	1.90849	-0.0168135	0.0276714	0	2	2	2	2	28	40	55	87	50	55	52	50	0	0
722395.65-2994697.47	4UG-HH5670	4UG-HH	2011	2012	2013	2014	5670	5670	SP	CA	Alive	Alive	Alive	Alive				0	0	0	0	162	160	160	166	-2	0	6	2.21219	2.20683	2.20683	2.22272	-0.00536173	0	0.0158906	3	3	3	3	42	28	38	41	55	49	53	57	4	8
722277.64-2994650.32	6UG-UH5143	6UG-UH	2011	2012	2013	2014	5143	5143	SP	SC	Alive	Alive	Alive	Alive				0	0	0	0	0	3	11	2	3	8	-9	0	0.60206	1.07918	0.477121	0.60206	0.477121	-0.60206	1	1	2	1	4	4	2	3	31	40	33	40	0	0
722262.68-2994667.02	6UG-UH1786	6UG-UH			2013	2014	1786	1786	SP	SC			Alive	Alive		1				0	0			2	0						0.477121	0						1	1			3	2			36	34
722542.75-2995054.81	3G-LH210	3G-LH	2011	2012	2013	2014	210	-1	CP	CB	Alive	Dead	Dead	Dead				0	1			8							0.954243							1				10				30				0
	4UG-HH1753	4UG-HH				2014	1753		SP	CA				Alive							0				11							1.07918							2				46				48
722278.88-2994667.30	6UG-UH5221	6UG-UH	2011	2012	2013	2014	5221	5221	SP	SC	Alive	Alive	Alive	Alive				0	0	0	0	6	11	20	28	5	9	8	0.845098	1.07918	1.32222	1.4624	0.234083	0.243038	0.140179	2	2	2	2	48	49	89	63	43	48	51	52	0	0
722314.54-2994655.49	5UG-LH5267	5UG-LH	2011	2012	2013	2014	5267	5267	SP	CB	Alive	Alive	Alive	Alive				0	0	0	0	9	9	10	12	0	1	2	1	1	1.04139	1.11394	0	0.0413927	0.0725507	1	1	2	2	12	19	38	47	26	28	35	34	0	0
722310.48-2994655.41	5UG-LH5269	5UG-LH	2011	2012	2013	2014	5269	5269	SP	CB	Alive	Alive	Alive	Alive				0	0	0	0	105	104	111	117	-1	7	6	2.02531	2.02119	2.04922	2.07188	-0.00411657	0.0280287	0.022664	3	3	3	3	33	47	52	45	48	49	54	59	2	3
722404.91-2994689.94	4UG-HH5515	4UG-HH	2011	2012	2013	2014	5515	5515	SP	CA	Alive	Alive	Alive	Alive				0	0	0	0	13	9	16	17	-4	7	1	1.14613	1	1.23045	1.25527	-0.146128	0.230449	0.0248236	2	1	2	2	30	23	69	42	55	60	65	62	1	0
722553.62-2994994.97	2G-HH6307	2G-HH	2011	2012	2013	2014	6307	6307	CP	CA	Alive	Alive	Alive	Alive				0	0	0	0	180	180	172	190	0	-8	18	2.25768	2.25768	2.23805	2.28103	0	-0.0196325	0.0429873	3	3	3	3	59	24	34	45	62	67	67	60	9	10
	2G-HH6314	2G-HH				2014	6314		CP	CA				Alive							0				75							1.88081							2				31				40
722551.80-2995045.90	3G-LH214	3G-LH	2011	2012	2013	2014	214	-1	CP	CB	Alive	Dead	Dead	Dead				0	1			1							0.30103							1				3				37				0
722514.16-2994985.61	2G-HH6483	2G-HH	2011	2012	2013	2014	6483	6483	CP	CA	Alive	Alive	Alive	Alive				0	0	0	0	373	373	370	370	0	-3	0	2.57287	2.57287	2.56937	2.56937	0	-0.00349769	0	4	4	4	4	70	66	55	55	70	69	63	60	25	15
722291.61-2994664.83	6UG-UH5201	6UG-UH	2011	2012	2013	2014	5201	5201	SP	SC	Alive	Alive	Alive	Alive				0	0	0	0	304	320	320	320	16	0	0	2.4843	2.50651	2.50651	2.50651	0.0222052	0	0	4	4	4	4	55	70	56	50	52	84	64	50	0	0
722266.48-2994661.31	6UG-UH1770	6UG-UH			2013	2014	1770	1770	SP	SC			Alive	Alive		1				0	0			1	1			0			0.30103	0.30103			0			1	1			1	4			32	41
722549.83-2995050.96	3G-LH225	3G-LH	2011	2012	2013	2014	225	-1	CP	CB	Alive	Dead	Dead	Dead				0	1			146							2.16732							3				36				60				0
722384.02-2994688.47	4UG-HH5950	4UG-HH	2011	2012	2013	2014	5950	5950	SP	CA	Alive	Alive	Alive	Alive				0	0	0	0	21	17	21	19	-4	4	-2	1.34242	1.25527	1.34242	1.30103	-0.0871502	0.0871502	-0.0413927	2	2	2	2	23	17		17	24	50		40	0	0
722506.23-2994995.14	2G-HH6480	2G-HH	2011	2012	2013	2014	6480	6480	CP	CA	Alive	Alive	Alive	Alive				0	0	0	0	218	210	210	213	-8	0	3	2.34044	2.32428	2.32428	2.33041	-0.0161617	0	0.00613132	3	3	3	3	44	20	31	23	52	40	42	41	11	11
722547.17-2995066.70	3G-LH242	3G-LH	2011	2012	2013		242	-1	CP	CB	Alive	Alive	Alive					0	0	0		3	2	2		-1	0		0.60206	0.477121	0.477121		-0.124939	0		1	1	1		2	4	8	0	28	20	30		0	0
722260.47-2994664.10	6UG-UH1792	6UG-UH			2013	2014	1792	1792	SP	SC			Alive	Alive		1				0	0			3	1.5			-1.5			0.60206	0.39794			-0.20412			1	1			4	7			35	27
722266.68-2994662.26	6UG-UH1779	6UG-UH			2013	2014	1779	1779	SP	SC			Alive	Alive		1				0	0			1	0						0.30103	0						1	1			1	9			36	40
722302.94-2994663.19	5UG-LH5263	5UG-LH	2011	2012	2013	2014	5263	5263	SP	CB	Alive	Alive	Unknown	Alive				0	0		0	1	1		0	0			0.30103	0.30103		0	0			1	1		1	29	47		10	48	41		28	0	1
722532.39-2995047.01	3G-LH249	3G-LH	2011	2012	2013	2014	249	-1	CP	CB	Alive	Dead	Dead	Dead				0	1			129							2.11394							3				31				48				1
	6UG-UH1788	6UG-UH				2014	1788		SP	SC				Alive							0				4							0.69897							1				9				39
722310.01-2994670.24	5UG-LH5290	5UG-LH	2011	2012	2013	2014	5290	5290	SP	CB	Alive	Alive	Alive	Alive				0	0	0	0	108	106	115	115	-2	9	0	2.03743	2.02938	2.06446	2.06446	-0.00804272	0.0350742	0	3	3	3	3	38	23	48	47	47	48	60	58	5	7
722275.11-2994661.98	6UG-UH5130	6UG-UH	2011	2012	2013	2014	5130	5130	SP	SC	Alive	Alive	Alive	Alive				0	0	0	0	4		26	18			-8	0.69897		1.43136	1.27875			-0.15261	2		2	2	70	86	99	110	55	56	55	57	0	0
722290.05-2994674.45	6UG-UH5115	6UG-UH	2011	2012	2013	2014	5115	5115	SP	SC	Alive	Alive	Alive	Alive				0	0	0	0	33	36	43	42	3	7	-1	1.53148	1.5682	1.64345	1.63347	0.0367228	0.075251	-0.00998422	2	2	2	2	43	36	43	45	56	54	57	56	0	0
722553.25-2995065.70	3G-LH256	3G-LH	2011	2012	2013	2014	256	-1	CP	CB	Alive	Dead	Dead	Dead				0	1			130							2.11727							3				26				48				0
722552.84-2995037.17	3G-LH258	3G-LH	2011	2012	2013	2014	258	-1	CP	CB	Alive	Dead	Dead	Dead				0	1			134							2.13033							3				41				54				5
722540.66-2995052.01	3G-LH261	3G-LH	2011	2012	2013	2014	261	-1	CP	CB	Alive	Dead	Dead	Dead				0	1			168							2.22789							3				28				48				3
722308.38-2994656.54	6UG-UH5003	6UG-UH	2011	2012	2013	2014	5003	5003	SP	SC	Alive	Alive	Alive	Alive				0	0	0	0	280	288	298	300	8	10	2	2.44871	2.4609	2.47567	2.47857	0.0121915	0.0147733	0.00289531	4	4	4	4	58	18	54	60	63	35	60	56	0	0
722268.92-2994662.38	6UG-UH5134	6UG-UH	2011	2012	2013	2014	5134	5134	SP	SC	Alive	Alive	Alive	Alive				0	0	0	0	298	298	288	303	0	-10	15	2.47567	2.47567	2.4609	2.48287	0	-0.0147733	0.0219757	4	4	4	4	40	53	73	66	65	65	67	57	0	0
722317.75-2994674.49	5UG-LH5402	5UG-LH	2011	2012	2013	2014	5402	5402	SP	CB	Alive	Alive	Alive	Alive				0	0	0	0	340	332	332	341	-8	0	9	2.53275	2.52244	2.52244	2.53403	-0.0103101	0	0.0115819	4	4	4	4	52	29	35	45	56	50	66	65	12	11
722545.65-2995064.83	3G-LH263	3G-LH	2011	2012	2013	2014	263	-1	CP	CB	Alive	Dead	Dead	Dead				0	1			110							2.04532							3				33				42				1
722546.61-2994994.08	2G-HH6313	2G-HH	2011	2012	2013	2014	6313	6313	CP	CA	Alive	Alive	Alive	Alive				0	0	0	0	47	45	43	50	-2	-2	7	1.68124	1.66276	1.64345	1.70757	-0.0184834	-0.0193052	0.0641175	2	2	2	2		24	49	42		42	50	53	7	0
722533.36-2995002.43	2G-HH6331	2G-HH	2011	2012	2013	2014	6331	6331	CP	CA	Alive	Alive	Alive	Alive				0	0	0	0	25	18	23	22	-7	5	-1	1.41497	1.27875	1.38021	1.36173	-0.13622	0.101458	-0.0184834	2	2	2	2		25	35	20		59	54	50	3	3
722505.86-2995004.43	2G-HH6472	2G-HH	2011	2012	2013		6472	6472	CP	CA	Alive	Alive	Dead					0	0	1		136	138			2			2.13672	2.14301			0.00629423			3	3			26				40	20			3	0
722533.11-2995061.58	3G-LH283	3G-LH	2011	2012	2013	2014	283	-1	CP	CB	Alive	Dead	Dead	Dead				0	1			5							0.778151							1				8				32				0
722549.31-2995006.57	2G-HH5733	2G-HH	2011	2012	2013	2014	5733	5733	CP	CA	Alive	Alive	Alive	Dead				0	0	0	1	9	4	7		-5	3		1	0.69897	0.90309		-0.30103	0.20412		1	1	1		20	19	13		37	36	33		0	0
722545.77-2994983.66	2G-HH6490	2G-HH	2011	2012	2013	2014	6490	6490	CP	CA	Alive	Alive	Alive	Alive				0	0	0	0	660	670	670	680	10	0	10	2.8202	2.82672	2.82672	2.83315	0.00652106	0	0.00642459	4	4	4	4		50	72	47		70	60	53	0	21
722277.27-2994669.99	6UG-UH5222	6UG-UH	2011	2012	2013	2014	5222	5222	SP	SC	Alive	Alive	Alive	Alive				0	0	0	0	424	424	426	430	0	2	4	2.62839	2.62839	2.63043	2.63448	0	0.00203894	0.0040494	4	4	4	4	60	60	80	80	65	50	67	65	0	0
722508.69-2994970.47	1G-UH5978	1G-UH	2011	2012	2013	2014	5978	5978	CP	SC	Alive	Alive	Alive	Alive				0	0	0	0	20	20	23	20	0	3	-3	1.32222	1.32222	1.38021	1.32222	0	0.0579919	-0.0579919	2	2	2	2	60	40	89	54	58	50	70	52	0	0
722500.32-2994979.53	1G-UH5981	1G-UH	2011	2012	2013	2014	5981	5981	CP	SC	Alive	Alive	Alive	Alive				0	0	0	0	148	153	155	150	5	2	-5	2.17319	2.18752	2.19312	2.17898	0.0143345	0.00560388	-0.0141477	3	3	3	3	37	40	50	40	49	55	56	60	0	0
722347.23-2994675.02	5UG-LH5501	5UG-LH	2011	2012	2013	2014	5501	5501	SP	CB	Alive	Alive	Alive	Alive				0	0	0	0	24	14	25	28	-10	11	3	1.39794	1.17609	1.41497	1.4624	-0.221849	0.238882	0.0474246	2	2	2	2	26	29	40	46	44	43	40	45	0	0
722293.05-2994664.75	6UG-UH5101	6UG-UH	2011	2012	2013	2014	5101	5101	SP	SC	Alive	Alive	Alive	Alive				0	0	0	0	244	248	242	250	4	-6	8	2.38917	2.3962	2.38561	2.39967	0.00703326	-0.0105931	0.0140674	3	3	3	4	68	50	58	50	58	62	66	50	0	0
722300.20-2994665.67	6UG-UH5108	6UG-UH	2011	2012	2013	2014	5108	5108	SP	SC	Alive	Alive	Alive	Alive				0	0	0	0	160	165	164	175	5	-1	11	2.20683	2.22011	2.21748	2.24551	0.0132822	-0.00262414	0.0280287	3	3	3	3	31	32	61	60	57	62	68	65	0	0
722276.53-2994649.74	6UG-UH5142	6UG-UH	2011	2012	2013	2014	5142	5142	SP	SC	Alive	Alive	Alive	Alive				0	0	0	0	320	316	321	325	-4	5	4	2.50651	2.50106	2.50786	2.51322	-0.00544577	0.00679661	0.00536173	4	4	4	4	50	48	56	70	60	50	53	60	0	0
722552.80-2995063.79	3G-LH286	3G-LH	2011	2012	2013		286	-1	CP	CB	Alive	Alive	Alive					0	0	0		4	2	3		-2	1		0.69897	0.477121	0.60206		-0.221849	0.124939		1	1	1		7	3	3	0	29	33	27		0	0
722286.97-2994647.82	6UG-UH5258	6UG-UH		2012	2013	2014	5258	5258	SP	SC		Alive	Alive	Alive					0	0	0		308	307	315		-1	8		2.48996	2.48855	2.49969		-0.00140776	0.0111364		4	4	4		39	68	60		57	68	70		0
722306.39-2994675.50	5UG-LH5288	5UG-LH	2011	2012	2013	2014	5288	5288	SP	CB	Alive	Alive	Alive	Alive				0	0	0	0	334	337	340	344	3	3	4	2.52504	2.52892	2.53275	2.53782	0.00387189	0.00383768	0.00506472	4	4	4	4	60	33	50	46	65	65	83	64	14	18
722329.12-2994676.80	5UG-LH5408	5UG-LH	2011	2012	2013	2014	5408	5408	SP	CB	Alive	Alive	Alive	Alive				0	0	0	0	19	24	28	24	5	4	-4	1.30103	1.39794	1.4624	1.39794	0.09691	0.064458	-0.064458	2	2	2	2	35	43	75	50	47	42	50	46	0	3
722555.75-2995006.16	2G-HH5741	2G-HH	2011	2012	2013	2014	5741	5741	CP	CA	Alive	Alive	Alive	Alive				0	0	0	0	16	13	10	12	-3	-3	2	1.23045	1.14613	1.04139	1.11394	-0.0843209	-0.104735	0.0725507	2	2	2	2	47	65	73	60	54	57	52	50	0	0
722553.45-2995006.49	2G-HH5743	2G-HH	2011	2012	2013	2014	5743	5743	CP	CA	Alive	Alive	Alive	Alive				0	0	0	0	34	30	32	35	-4	2	3	1.54407	1.49136	1.51851	1.5563	-0.0527064	0.0271522	0.0377886	2	2	2	2	51	63	63	19	55	52	54	52	3	4
722542.88-2995066.72	3G-LH292	3G-LH	2011	2012	2013	2014	292	-1	CP	CB	Alive	Dead	Dead	Dead				0	1			115							2.06446							3				23				49				0
722546.02-2994995.80	2G-HH6312	2G-HH	2011	2012	2013	2014	6312	6312	CP	CA	Alive	Alive	Alive	Alive				0	0	0	0	152	160	152	160	8	-8	8	2.18469	2.20683	2.18469	2.20683	0.0221344	-0.0221344	0.0221344	3	3	3	3	49	40	45	27	58	50	49	47	7	5
722508.92-2995008.90	2G-HH6471	2G-HH	2011	2012	2013	2014	6471	6471	CP	CA	Alive	Alive	Alive	Dead				0	0	0	1	10	12	8		2	-4		1.04139	1.11394	0.954243		0.0725507	-0.159701		2	2	1			29	20			35	32			0
722537.03-2994968.47	2G-HH6498	2G-HH	2011	2012	2013	2014	6498	6498	CP	CA	Alive	Alive	Alive	Alive				0	0	0	0	235	250	243	242	15	-7	-1	2.37291	2.39967	2.38739	2.38561	0.0267617	-0.0122839	-0.00178355	3	4	3	3	54	40	50	50	68	59	58	55	6	10
722545.95-2995010.82	2G-HH5782	2G-HH	2011	2012	2013	2014	5782	5782	CP	CA	Alive	Alive	Alive	Alive				0	0	0	0	40	35	36	35	-5	1	-1	1.61278	1.5563	1.5682	1.5563	-0.0564814	0.0118992	-0.0118992	2	2	2	2	60	51	64	23	60	56	56	50	4	3
722371.26-2994667.67	3G-LH1078	3G-LH	2011	2012	2013	2014	1078	-1	CP	CB	Alive	Dead	Dead	Dead				0	1			110							2.04532							3				29				53				2
722552.10-2995064.67	3G-LH252	3G-LH	2011	2012	2013	2014	252	0	CP	CB	Alive	Not Found	Unknown	NSE				0	1			6							0.845098							1				25				28				0
722575.30-2995053.18	3G-LH0	3G-LH	2011	2012	2013	2014	0	0	CP	CB	Alive	Not Found	Unknown	NSE				0	1			20							1.32222							2				56			0	53				1
722546.75-2995041.59	3G-LH0	3G-LH	2011	2012	2013	2014	0	0	CP	CB	Alive	Not Found	Unknown	NSE				0	1			125							2.10037							3				55			0	52				4
722508.49-2995002.73	2G-HH0	2G-HH	2011	2012	2013	2014	0	0	CP	CA	Alive	Not Found	Unknown	NSE				0	1			5							0.778151							1				20			0	29				0
722574.85-2995041.62	3G-LH6	3G-LH	2011	2012	2013	2014	6	0	CP	CB	Alive	Not Found	Unknown	NSE				0	1			0							0							1				5			0	29				0
722558.44-2995061.18	3G-LH14	3G-LH	2011	2012	2013		14	0	CP	CB	Alive	Not Found	Alive					0		0		40		42					1.61278		1.63347					2		2		57		47	0	53		47		6
722572.18-2995046.66	3G-LH26	3G-LH	2011	2012	2013		26	0	CP	CB	Alive	Not Found	Alive					0		0		26		26					1.43136		1.43136					2		2		49		79		48		54		4
722559.36-2995060.65	3G-LH60	3G-LH	2011	2012	2013		60	0	CP	CB	Alive	Not Found	Alive					0		0		16		13					1.23045		1.14613					2		2		25		21	0	36		18		0
722554.39-2995057.12	3G-LH67	3G-LH	2011	2012	2013	2014	67	0	CP	CB	Alive	Dead	Dead	Dead				0	1			170							2.233							3				35				48				3
722561.26-2995058.91	3G-LH91	3G-LH	2011	2012	2013	2014	91	0	CP	CB	Alive	Not Found	Unknown	NSE				0	1																					3			0	33				0
722555.44-2995057.42	3G-LH103	3G-LH	2011	2012	2013	2014	103	0	CP	CB	Alive	Dead	Dead	Dead				0	1			1							0.30103							1				3				38				0
722558.51-2995056.13	3G-LH106	3G-LH	2011	2012	2013	2014	106	0	CP	CB	Alive	Dead	Dead	Dead				0	1																					35				47				0
722557.23-2995056.21	3G-LH120	3G-LH	2011	2012	2013		120	0	CP	CB	Alive	Alive	Unknown					0	0			1							0.30103							1				1				35				0
722561.19-2995055.04	3G-LH127	3G-LH	2011	2012	2013		127	0	CP	CB	Alive	Not Found	Alive					0		0		151		153					2.18184		2.18752					3		3		39		43	0	58		66		7
722388.92-2994681.14	4UG-HH105	4UG-HH	2011	2012	2013	2014	105	0	SP	CA	Alive	Not Found	Unknown	NSE				0	1			180							2.25768							3				37			0	67				4
722556.68-2995057.67	3G-LH129	3G-LH	2011	2012	2013	2014	129	0	CP	CB	Alive	Not Found	Unknown	NSE				0	1			1							0.30103							1				2			0	25				0
722557.63-2995057.50	3G-LH134	3G-LH	2011	2012	2013	2014	134	0	CP	CB	Alive	Not Found	Unknown	NSE				0	1			1							0.30103							1				3			0	30				0
722550.06-2995060.88	3G-LH149	3G-LH	2011	2012	2013	2014	149	0	CP	CB	Alive	Not Found	Unknown	NSE				0	1			1							0.30103							1				4			0	29				0
722556.93-2995052.49	3G-LH191	3G-LH	2011	2012	2013	2014	191	0	CP	CB	Alive	Dead	Dead	Dead				0	1			1							0.30103							1				2				17				0
722542.91-2995051.47	3G-LH212	3G-LH	2011	2012	2013	2014	212	0	CP	CB	Alive	Not Found	Unknown	NSE				0	1			2							0.477121							1				14			0	30				0
722534.44-2995059.69	3G-LH235	3G-LH	2011	2012	2013	2014	235	0	CP	CB	Alive	Not Found	Unknown	NSE				0	1			7							0.90309							1				10			0	52				0
722576.84-2995034.27	3G-LH238	3G-LH	2011	2012	2013	2014	238	0	CP	CB	Alive	Not Found	Unknown	NSE				0	1			1							0.30103							1							0
722583.16-2995035.42	3G-LH267	3G-LH	2011	2012	2013	2014	267	0	CP	CB	Alive	Not Found	Unknown	NSE				0	1			2							0.477121							1							0
722538.40-2995057.72	3G-LH294	3G-LH	2011	2012	2013	2014	294	0	CP	CB	Alive	Not Found	Unknown	NSE				0	1			1							0.30103							1				1			0	30				0
722533.06-2995061.65	3G-LH296	3G-LH	2011	2012	2013	2014	296	0	CP	CB	Alive	Not Found	Unknown	NSE				0	1			8							0.954243							1				21			0	30				0
722584.92-2995035.27	3G-LH298	3G-LH	2011	2012	2013	2014	298	0	CP	CB	Alive	Not Found	Unknown	NSE				0	1			2							0.477121							1							0
722556.33-2995048.68	3G-LH1605	3G-LH			2013	2014	1605	1605	CP	CB			Alive	NSE		1				0				4							0.69897							1				5				38
722545.02-2995043.14	3G-LH5161	3G-LH		2012	2013	2014	5161	5161	CP	CB		Alive	Alive	Alive					0	0	0		119	120	122		1	2		2.07918	2.08279	2.08991		0.00360412	0.00711974		3	3	3		47	47	41		50	63	55		6
722547.98-2995046.23	3G-LH5162	3G-LH	2011	2012	2013	2014	5162	5162	CP	CB	Alive	Alive	Alive	Alive				0	0	0	0	320	330	333	336	10	3	3	2.50651	2.51983	2.52375	2.52763	0.013323	0.00391847	0.00388343	4	4	4	4	45	50	46	35	55	60	69	68	21	14
722533.65-2995037.95	3G-LH5163	3G-LH	2011	2012	2013	2014	5163	5163	CP	CB	Alive	Alive	Alive	Alive				0	0	0	0	165	163	168	171	-2	5	3	2.22011	2.21484	2.22789	2.23553	-0.00526424	0.0130429	0.00764174	3	3	3	3	47	43	48	25	64	56	62	53	5	9
722537.07-2995039.31	3G-LH5164	3G-LH	2011	2012	2013	2014	5164	5164	CP	CB	Alive	Alive	Alive	Alive				0	0	0	0	150	162	155	161	12	-7	6	2.17898	2.21219	2.19312	2.20952	0.0332107	-0.019063	0.0163904	3	3	3	3	31	42	64	48	55	56	62	61	5	7
722528.28-2995042.95	3G-LH5165	3G-LH	2011	2012	2013	2014	5165	5165	CP	CB	Alive	Alive	Alive	Alive				0	0	0	0	150	153	150	148	3	-3	-2	2.17898	2.18752	2.17898	2.17319	0.00854377	-0.00854377	-0.00579068	3	3	3	3	29	17	16	14	49	40	46	41	0
722529.16-2995052.72	3G-LH5166	3G-LH	2011	2012	2013	2014	5166	5166	CP	CB	Alive	Alive	Alive	Alive				0	0	0	0	141	136	136	134	-5	0	-2	2.15229	2.13672	2.13672	2.13033	-0.0155678	0	-0.0063868	3	3	3	3	29	46	34	27	59	34	52	52	1	6
722532.56-2995051.75	3G-LH5167	3G-LH	2011	2012	2013	2014	5167	5167	CP	CB	Alive	Alive	Alive	Alive				0	0	0	0	137	136	136	134	-1	0	-2	2.13988	2.13672	2.13672	2.13033	-0.00315852	0	-0.0063868	3	3	3	3	43	35	43	38	52	52	55	55	2	4
722532.30-2995042.32	3G-LH5168	3G-LH	2011	2012	2013	2014	5168	5168	CP	CB	Alive	Alive	Alive	Alive				0	0	0	0	12	9	9	9.5	-3	0	0.5	1.11394	1	1	1.02119	-0.113943	0	0.0211893	2	1	1	1	24	36	48	30	49	44	48	41	0	0
722536.81-2995043.95	3G-LH5169	3G-LH	2011	2012	2013	2014	5169	5169	CP	CB	Alive	Alive	Alive	Alive				0	0	0	0	110	110	113	108	0	3	-5	2.04532	2.04532	2.0569	2.03743	0	0.0115819	-0.0194784	3	3	3	3	26	27	65	24	56	48	49	61	0	4
722551.24-2995054.57	3G-LH5170	3G-LH	2011	2012	2013	2014	5170	5170	CP	CB	Alive	Alive	Alive	Alive				0	0	0	0	320	324	330	321	4	6	-9	2.50651	2.51188	2.51983	2.50786	0.00537833	0.00794463	-0.0119721	4	4	4	4	58	46	58	36	55	50	65	46	14	14
722549.14-2995053.76	3G-LH5171	3G-LH	2011	2012	2013	2014	5171	5171	CP	CB	Alive	Alive	Alive	NSE				0	0	0		1	3	3		2	0		0.30103	0.60206	0.60206		0.30103	0		1	1	1		10	14	14		26	25	30		0	0
722573.45-2995053.15	3G-LH5172	3G-LH	2011	2012	2013	2014	5172	5172	CP	CB	Alive	Alive	Unknown	Alive				0	0		0	10	45		42	35			1.04139	1.66276		1.63347	0.621365			2	2		2	37	66		36	49	48		42	0	6
722557.79-2995061.65	3G-LH5173	3G-LH	2011	2012	2013	2014	5173	5173	CP	CB	Alive	Alive	Alive	Dead				0	0	0	1	20	26	23		6	-3		1.32222	1.43136	1.38021		0.109144	-0.0511525		2	2	2		42	46	43		49	39	45		3	4
722558.58-2995061.44	3G-LH5174	3G-LH	2011	2012	2013	2014	5174	5174	CP	CB	Alive	Alive	Alive	Alive				0	0	0	0	35	30	30	32	-5	0	2	1.5563	1.49136	1.49136	1.51851	-0.0649408	0	0.0271522	2	2	2	2	49	43	42	30	49	36	52	45	1	2
722557.74-2995061.84	3G-LH5176	3G-LH		2012	2013	2014	5176	5176	CP	CB		Alive	Unknown	Dead	1				0	1			0							0							1				7				34				0
722557.65-2995062.02	3G-LH5177	3G-LH		2012	2013		5177	5177	CP	CB		Alive	Dead		1				0	1			0							0							1				11				39				0
722350.53-2994684.31	5UG-LH300	5UG-LH	2011	2012	2013	2014	300	-1	SP	CB	Alive	Dead	Dead	Dead				0	1			34							1.54407							2				47				47				2
722352.39-2994685.57	5UG-LH307	5UG-LH	2011	2012	2013	2014	307	-1	SP	CB	Alive	Dead	Dead	Dead				0	1			36							1.5682							2				41				44				0
722361.23-2994684.92	5UG-LH310	5UG-LH	2011	2012	2013	2014	310	-1	SP	CB	Alive	Dead	Dead	Dead				0	1			17							1.25527							2				14				40				0
722343.98-2994662.60	5UG-LH316	5UG-LH	2011	2012	2013	2014	316	-1	SP	CB	Alive	Dead	Dead	Dead				0	1			8							0.954243							1				24				37				0
722350.35-2994676.49	5UG-LH319	5UG-LH	2011	2012	2013	2014	319	-1	SP	CB	Alive	Dead	Dead	Dead				0	1			40							1.61278							2				20				39				0
722334.79-2994669.87	5UG-LH320	5UG-LH	2011	2012	2013	2014	320	-1	SP	CB	Alive	Dead	Dead	Dead				0	1			21							1.34242							2				36				57				3
722360.38-2994685.22	5UG-LH341	5UG-LH	2011	2012	2013	2014	341	-1	SP	CB	Alive	Dead	Dead	Dead				0	1			50							1.70757							2				50				59				1
722325.04-2994675.49	5UG-LH351	5UG-LH	2011	2012	2013	2014	351	0	SP	CB	Alive	Dead	Dead	Dead				0	1			10							1.04139							2				19				26				0
722346.16-2994665.76	5UG-LH354	5UG-LH	2011	2012	2013	2014	354	-1	SP	CB	Alive	Dead	Dead	Dead				0	1			81							1.91381							2				16				46				0
	5UG-LH355	5UG-LH				2014	355		SP	CB				Alive							0				20							1.32222							2				53				56
722334.75-2994664.15	5UG-LH356	5UG-LH	2011	2012	2013	2014	356	-1	SP	CB	Alive	Dead	Dead	Dead				0	1			86							1.93952							2				12				40				0
722335.05-2994669.86	5UG-LH360	5UG-LH	2011	2012	2013	2014	360	-1	SP	CB	Alive	Dead	Dead	Dead				0	1			44							1.65321							2				21				46				0
722334.45-2994662.84	5UG-LH362	5UG-LH	2011	2012	2013	2014	362	-1	SP	CB	Alive	Dead	Dead	Dead				0	1			238							2.3784							3				60				66				5
722362.71-2994681.40	5UG-LH384	5UG-LH	2011	2012	2013	2014	384	-1	SP	CB	Alive	Dead	Dead	Dead				0	1			46							1.6721							2				20				39				0
722356.65-2994684.50	5UG-LH404	5UG-LH	2011	2012	2013	2014	404	-1	SP	CB	Alive	Dead	Dead	Dead				0	1			9							1							1				9				16				0
722319.13-2994674.87	5UG-LH416	5UG-LH	2011	2012	2013	2014	416	-1	SP	CB	Alive	Dead	Dead	Dead				0	1			214							2.33244							3				59				60				4
722341.96-2994662.40	5UG-LH421	5UG-LH	2011	2012	2013	2014	421	-1	SP	CB	Alive	Dead	Dead	Dead				0	1			16							1.23045							2				17				27				0
722333.14-2994652.97	5UG-LH424	5UG-LH	2011	2012	2013	2014	424	0	SP	CB	Alive	Not Found	Unknown	NSE				0	1			1							0.30103							1				2			0	19				0
	5UG-LH431	5UG-LH					431		SP	CB
722356.28-2994679.35	5UG-LH437	5UG-LH	2011	2012	2013	2014	437	-1	SP	CB	Alive	Dead	Dead	Dead				0	1			150							2.17898							3				20				49				1
722361.20-2994672.38	5UG-LH443	5UG-LH	2011	2012	2013	2014	443	0	SP	CB	Alive	Dead	Dead	Dead				0	1			96							1.98677							2				27				48				2
722360.65-2994663.86	5UG-LH447	5UG-LH	2011	2012	2013	2014	447	-1	SP	CB	Alive	Dead	Dead	Dead				0	1			25							1.41497							2				20				19				0
722347.90-2994662.63	5UG-LH454	5UG-LH	2011	2012	2013	2014	454	-1	SP	CB	Alive	Dead	Dead	Dead				0	1			187							2.27416							3				50				51				4
722346.26-2994658.97	5UG-LH455	5UG-LH	2011	2012	2013	2014	455	-1	SP	CB	Alive	Dead	Dead	Dead				0	1			164							2.21748							3				34				49				1
722354.85-2994663.93	5UG-LH458	5UG-LH	2011	2012	2013	2014	458	-1	SP	CB	Alive	Dead	Dead	Dead				0	1			176							2.24797							3				34				52				4
722350.55-2994664.79	5UG-LH465	5UG-LH	2011	2012	2013	2014	465	0	SP	CB	Alive	Dead	Dead	Dead				0	1			58							1.77085							2				28				30				0
722355.96-2994659.88	5UG-LH466	5UG-LH	2011	2012	2013	2014	466	-1	SP	CB	Alive	Dead	Dead	Dead				0	1			59							1.77815							2				30				33
722347.98-2994656.12	5UG-LH471	5UG-LH	2011	2012	2013	2014	471	0	SP	CB	Alive	Not Found	Unknown	NSE				0	1			5							0.778151							1				23			0	21				0
722338.18-2994652.06	5UG-LH477	5UG-LH	2011	2012	2013	2014	477	-1	SP	CB	Alive	Dead	Dead	Dead				0	1			261							2.4183							4				25				47				0
722364.62-2994667.68	5UG-LH479	5UG-LH	2011	2012	2013	2014	479	-1	SP	CB	Alive	Dead	Dead	Dead				0	1			220							2.34439							3				33				55				4
722350.56-2994657.45	5UG-LH483	5UG-LH	2011	2012	2013	2014	483	-1	SP	CB	Alive	Dead	Dead	Dead				0	1			133							2.1271							3				18				32				0
722351.39-2994657.84	5UG-LH484	5UG-LH	2011	2012	2013	2014	484	-1	SP	CB	Alive	Dead	Dead	Dead				0	1			37							1.57978							2				15				48				0
722339.37-2994651.49	5UG-LH487	5UG-LH	2011	2012	2013	2014	487	-1	SP	CB	Alive	Dead	Dead	Dead				0	1			68							1.83885							2				33				49				0
722359.27-2994659.23	5UG-LH493	5UG-LH	2011	2012	2013		493	0	SP	CB	Alive	Alive	Unknown					0	0			2	2			0			0.477121	0.477121			0			1	1			5	17			45	43			0
722363.52-2994664.42	5UG-LH494	5UG-LH	2011	2012	2013	2014	494	-1	SP	CB	Alive	Dead	Dead	Dead				0	1			133							2.1271							3				12				47				0
722366.79-2994667.21	5UG-LH495	5UG-LH	2011	2012	2013	2014	495	-1	SP	CB	Alive	Dead	Dead	Dead				0	1			37							1.57978							2				26				44				0
722354.04-2994664.99	5UG-LH497	5UG-LH	2011	2012	2013	2014	497	-1	SP	CB	Alive	Dead	Dead	Dead				0	1			96							1.98677							2				39				47				1
722343.13-2994663.08	5UG-LH499	5UG-LH	2011	2012	2013	2014	499	0	SP	CB	Alive	Not Found	Unknown	NSE				0	1			2							0.477121							1				27			0	50				0
722551.21-2995010.10	2G-HH504	2G-HH	2011	2012	2013	2014	504	0	CP	CA	Alive	Dead	Dead	Dead				0	1			15							1.20412							2				13				42				0
722543.96-2995011.17	2G-HH540	2G-HH	2011	2012	2013	2014	540	0	CP	CA	Alive	Not Found	Unknown	NSE				0	1			30							1.49136							2				60			0	40				3
722544.85-2995010.08	2G-HH556	2G-HH	2011	2012	2013	2014	556	0	CP	CA	Alive	Dead	Dead	Dead				0	1			66							1.82607							2				29				36				0
722547.78-2994990.14	2G-HH558	2G-HH	2011	2012	2013		558	0	CP	CA	Alive	Not Found	Alive					0		0		17		18					1.25527		1.27875					2		2				48				43		3
722535.11-2994995.97	2G-HH560	2G-HH	2011	2012	2013	2014	560	-1	CP	CA	Alive	Dead	Dead	Dead				0	1			150							2.17898							3
722537.69-2994994.10	2G-HH570	2G-HH	2011	2012	2013	2014	570	0	CP	CA	Alive	Not Found	Unknown	NSE				0	1			30							1.49136							2							0					2
722527.03-2995024.52	2G-HH571	2G-HH	2011	2012	2013	2014	571	-1	CP	CA	Alive	Dead	Dead	Dead				0	1			134							2.13033							3				7				44				2
722312.17-2994667.88	5UG-LH584	5UG-LH	2011	2012	2013		584	584	SP	CB	Alive	Alive	Alive					0	0	0		148	153	148		5	-5		2.17319	2.18752	2.17319		0.0143345	-0.0143345		3	3	3		32	37	48		60	59	66		2	6
722546.37-2994997.01	2G-HH616	2G-HH	2011	2012	2013	2014	616	0	CP	CA	Alive	Not Found	Unknown	NSE				0	1			1							0.30103							1				2			0	34				0
722563.35-2994999.64	2G-HH622	2G-HH	2011	2012	2013	2014	622	0	CP	CA	Alive	Not Found	Unknown	NSE				0	1			111							2.04922							3				28			0	39				0
722559.31-2994998.86	2G-HH625	2G-HH	2011	2012	2013	2014	625	0	CP	CA	Alive	Not Found	Unknown	NSE				0	1			1							0.30103							1				8			0	38				0
722554.36-2995010.89	2G-HH648	2G-HH	2011	2012	2013	2014	648	0	CP	CA	Alive	Not Found	Unknown	NSE				0	1			9							1							1				12			0	43				0
722547.28-2995009.67	2G-HH658	2G-HH	2011	2012	2013	2014	658	0	CP	CA	Alive	Not Found	Unknown	NSE				0	1			33							1.53148							2				46			0	54				3
722506.98-2995005.36	2G-HH665	2G-HH	2011	2012	2013	2014	665	0	CP	CA	Alive	Not Found	Unknown	NSE				0	1			235							2.37291							3				39			0	58				6
722505.74-2995004.05	2G-HH667	2G-HH	2011	2012	2013	2014	667	-1	CP	CA	Alive	Dead	Dead	Dead				0	1			42							1.63347							2				30				39				1
722504.00-2995003.78	2G-HH668	2G-HH	2011	2012	2013	2014	668	-1	CP	CA	Alive	Dead	Dead	Dead				0	1			25							1.41497							2
722423.08-2994696.96	4UG-HH672	4UG-HH	2011	2012	2013	2014	672	0	SP	CA	Alive	Dead	Dead	Dead				0	1			16							1.23045							2				18				35				0
722514.38-2995003.19	2G-HH673	2G-HH	2011	2012	2013	2014	673	0	CP	CA	Alive	Not Found	Unknown	NSE				0	1			171							2.23553							3				19			0	49				0
722404.39-2994688.33	4UG-HH674	4UG-HH	2011	2012	2013		674	-1	SP	CA	Alive	Alive	Alive					0	0	0		5		6					0.778151		0.845098					1		1		17	32	20	0		47	33		0	0
722397.92-2994680.25	4UG-HH679	4UG-HH	2011	2012	2013	2014	679	-1	SP	CA	Alive	Dead	Dead	Dead				0	1			20							1.32222							2				26				40				0
722399.16-2994676.19	4UG-HH680	4UG-HH	2011	2012	2013	2014	680	0	SP	CA	Alive	Dead	Dead	Dead				0	1			40							1.61278							2				32				50				0
722545.17-2994996.84	2G-HH682	2G-HH	2011	2012	2013	2014	682	0	CP	CA	Alive	Not Found	Unknown	NSE				0	1			1							0.30103							1				2			0	11				0
722522.78-2995003.19	2G-HH683	2G-HH	2011	2012	2013	2014	683	-1	CP	CA	Alive	Dead	Dead	Dead				0	1			135							2.13354							3				20				46				1
722399.18-2994675.20	4UG-HH687	4UG-HH	2011	2012	2013	2014	687	0	SP	CA	Alive	Not Found	Unknown	NSE				0	1			0							0							1				9			0	36				0
722516.81-2995005.79	2G-HH688	2G-HH	2011	2012	2013	2014	688	-1	CP	CA	Alive	Dead	Dead	Dead				0	1			122							2.08991							3				30				40				2
722403.75-2994683.82	4UG-HH689	4UG-HH	2011	2012	2013	2014	689	0	SP	CA	Alive	Not Found	Unknown	NSE				0	1			6							0.845098							1				15			0	32				0
722517.05-2995005.48	2G-HH692	2G-HH	2011	2012	2013	2014	692	-1	CP	CA	Alive	Dead	Dead	Dead				0	1			197							2.29667							3				33				44				4
722511.92-2995007.09	2G-HH696	2G-HH	2011	2012	2013	2014	696	-1	CP	CA	Alive	Dead	Dead	Dead				0	1			14							1.17609							2
722532.43-2995001.01	2G-HH700	2G-HH	2011	2012	2013	2014	700	0	CP	CA	Alive	Not Found	Unknown	Dead				0	1																					9				40
722401.33-2994688.43	4UG-HH705	4UG-HH	2011	2012	2013	2014	705	-1	SP	CA	Alive	Dead	Dead	Dead				0	1			86							1.93952							2				27				53				2
722306.46-2994658.85	5UG-LH716	5UG-LH	2011	2012	2013	2014	716	-1	SP	CB	Alive	Dead	Dead	Dead				0	1			79							1.90309							2				12				44				0
722301.19-2994661.74	5UG-LH731	5UG-LH	2011	2012	2013	2014	731	-1	SP	CB	Alive	Dead	Dead	Dead				0	1			163							2.21484							3				30				50				1
722304.82-2994661.60	5UG-LH735	5UG-LH	2011	2012	2013	2014	735	-1	SP	CB	Alive	Dead	Dead	Dead				0	1			172							2.23805							3				32				51				2
722419.76-2994703.88	4UG-HH749	4UG-HH	2011	2012	2013	2014	749	0	SP	CA	Alive	Dead	Dead	Dead				0	1			9							1							1				4				22				0
722421.23-2994696.73	4UG-HH752	4UG-HH	2011	2012	2013		752	-1	SP	CA	Alive	Alive	Unknown					0	0			5	4			-1			0.778151	0.69897			-0.0791812			1	1			21	20			37	44			0	0
722399.77-2994692.99	4UG-HH756	4UG-HH	2011	2012	2013	2014	756	0	SP	CA	Alive	Not Found	Unknown	NSE				0	1			17							1.25527							2				17			0	40				0
722415.70-2994702.52	4UG-HH767	4UG-HH	2011	2012	2013	2014	767	-1	SP	CA	Alive	Dead	Dead	Dead				0	1			130							2.11727							3				36				41				1
722311.68-2994664.78	5UG-LH775	5UG-LH	2011	2012	2013	2014	775	0	SP	CB	Alive	Dead	Dead	Dead				0	1			17							1.25527							2				20				34				0
722314.05-2994657.82	5UG-LH786	5UG-LH	2011	2012	2013	2014	786	-1	SP	CB	Alive	Dead	Dead	Dead				0	1			30							1.49136							2				22				26				0
722315.30-2994674.94	5UG-LH788	5UG-LH	2011	2012	2013	2014	788	-1	SP	CB	Alive	Dead	Dead	Dead				0	1			2							0.477121							1				8				41				0
722313.16-2994655.07	5UG-LH796	5UG-LH	2011	2012	2013	2014	796	0	SP	CB	Alive	Not Found	Unknown	NSE				0	1			2							0.477121							1				5			0	42				0
722387.26-2994703.95	4UG-HH806	4UG-HH	2011	2012	2013		806	0	SP	CA	Alive	Not Found	Alive					0		0		1		3					0.30103		0.60206					1		1		18		26	0	27		35		0
722383.94-2994685.39	4UG-HH814	4UG-HH	2011	2012	2013	2014	814	-1	SP	CA	Alive	Dead	Dead	Dead				0	1			38							1.59106							2				17				39				0
722423.45-2994692.17	4UG-HH824	4UG-HH	2011	2012	2013	2014	824	-1	SP	CA	Alive	Dead	Dead	Dead				0	1			52							1.72428							2				10				36				0
722419.68-2994693.70	4UG-HH829	4UG-HH	2011	2012	2013	2014	829	-1	SP	CA	Alive	Dead	Dead	Dead				0	1			86							1.93952							2				18				42				0
722385.71-2994686.75	4UG-HH834	4UG-HH	2011	2012	2013	2014	834	-1	SP	CA	Alive	Dead	Dead	Dead				0	1			96							1.98677							2				21				45				3
722371.99-2994687.59	4UG-HH836	4UG-HH	2011	2012	2013	2014	836	0	SP	CA	Alive	Dead	Dead	Dead				0	1			137							2.13988							3				27				42				0
722380.13-2994682.98	4UG-HH840	4UG-HH	2011	2012	2013	2014	840	0	SP	CA	Alive	Dead	Dead	Dead				0	1			16							1.23045							2				12				28				0
722381.04-2994689.51	4UG-HH842	4UG-HH	2011	2012	2013	2014	842	-1	SP	CA	Alive	Dead	Dead	Dead				0	1			29							1.47712							2				12				40				0
722400.80-2994694.61	4UG-HH844	4UG-HH	2011	2012	2013	2014	844	0	SP	CA	Alive	Not Found	Unknown	NSE				0	1			2							0.477121							1				12			0	32				0
722383.65-2994683.94	4UG-HH852	4UG-HH	2011	2012	2013	2014	852	-1	SP	CA	Alive	Dead	Dead	Dead				0	1			162							2.21219							3				29				54				4
722384.84-2994703.84	4UG-HH855	4UG-HH	2011	2012	2013	2014	855	-1	SP	CA	Alive	Dead	Dead	Dead				0	1			141							2.15229							3				33				58				3
722402.64-2994690.69	4UG-HH870	4UG-HH	2011	2012	2013	2014	870	0	SP	CA	Alive	Not Found	Unknown	NSE				0	1			5							0.778151							1				23			0	43				0
722396.19-2994694.82	4UG-HH872	4UG-HH	2011	2012	2013	2014	872	-1	SP	CA	Alive	Dead	Dead	Dead				0	1			89							1.95424							2				32				56				2
722404.16-2994692.24	4UG-HH878	4UG-HH	2011	2012	2013	2014	878	-1	SP	CA	Alive	Dead	Dead	Dead				0	1			15							1.20412							2				5				37				0
722403.06-2994692.65	4UG-HH880	4UG-HH	2011	2012	2013		880	0	SP	CA	Alive	Not Found	Alive					0		0		75		61					1.88081		1.79239					2		2		39		64	0	55		56		4
722389.21-2994685.45	4UG-HH894	4UG-HH	2011	2012	2013	2014	894	-1	SP	CA	Alive	Dead	Dead	Dead				0	1			12							1.11394							2				13				37				0
722388.56-2994698.52	4UG-HH895	4UG-HH	2011	2012	2013	2014	895	0	SP	CA	Alive	Not Found	Unknown	NSE				0	1			20							1.32222							2				20			0	30				0
722398.09-2994691.98	4UG-HH906	4UG-HH	2011	2012	2013	2014	906	-1	SP	CA	Alive	Dead	Dead	Dead				0	1			40							1.61278							2				37				50				0
722402.97-2994690.09	4UG-HH933	4UG-HH	2011	2012	2013	2014	933	0	SP	CA	Alive	Not Found	Unknown	NSE				0	1			25							1.41497							2				17			0	40				0
722402.36-2994690.51	4UG-HH936	4UG-HH	2011	2012	2013	2014	936	-1	SP	CA	Alive	Dead	Dead	Dead				0	1			90							1.95904							2				23				38				0
722395.70-2994684.78	4UG-HH943	4UG-HH	2011	2012	2013	2014	943	0	SP	CA	Alive	Dead	Dead	Dead				0	1			18							1.27875							2				31				50				1
722401.93-2994690.25	4UG-HH948	4UG-HH	2011	2012	2013	2014	948	-1	SP	CA	Alive	Dead	Dead	Dead				0	1			38							1.59106							2				17				44				0
722405.51-2994714.61	4UG-HH960	4UG-HH	2011	2012	2013	2014	960	0	SP	CA	Alive	Not Found	Unknown	NSE				0	1			0							0							1				2			0	36				0
722401.04-2994705.78	4UG-HH961	4UG-HH	2011	2012	2013	2014	961	-1	SP	CA	Alive	Dead	Dead	Dead				0	1			18							1.27875							2				28								0
722397.18-2994708.79	4UG-HH962	4UG-HH	2011	2012	2013	2014	962	-1	SP	CA	Alive	Dead	Dead	Dead				0	1			22							1.36173							2				19				31				0
722402.21-2994714.20	4UG-HH964	4UG-HH	2011	2012	2013	2014	964	0	SP	CA	Alive	Not Found	Unknown	NSE				0	1			2							0.477121							1				10			0	25				0
722405.20-2994715.40	4UG-HH969	4UG-HH	2011	2012	2013	2014	969	0	SP	CA	Alive	Not Found	Unknown	NSE				0	1			0							0							1				3			0	48				0
722400.15-2994692.73	4UG-HH983	4UG-HH	2011	2012	2013	2014	983	-1	SP	CA	Alive	Dead	Dead	Dead				0	1			30							1.49136							2				25				49				1
722398.81-2994693.00	4UG-HH985	4UG-HH	2011	2012	2013	2014	985	-1	SP	CA	Alive	Dead	Dead	Dead				0	1			98							1.99564							2				23				43				1
722272.23-2994666.49	6UG-UH1002	6UG-UH	2011	2012	2013	2014	1002	0	SP	SC	Alive	Not Found	Unknown	NSE				0	1			1							0.30103							1				1			0	30				0
722261.93-2994667.33	6UG-UH1003	6UG-UH	2011	2012	2013		1003	1003	SP	SC	Alive	Alive	Alive					0	0	0		1	1			0			0.30103	0.30103			0			1	1			5	4	7		20	17	45		0	0
722528.78-2994962.14	1G-UH1005	1G-UH	2011	2012	2013	2014	1005	0	CP	SC	Alive	Not Found	Unknown	NSE				0	1			97							1.99123							2				29			0	54				0
722261.21-2994666.74	6UG-UH1008	6UG-UH	2011	2012	2013		1008	1008	SP	SC	Alive	Alive	Alive					0	0	0		6	6	7		0	1		0.845098	0.845098	0.90309		0	0.0579919		1	1	1		20	23	21		46	41	40		0	0
722516.39-2994964.03	1G-UH1012	1G-UH	2011	2012	2013	2014	1012	0	CP	SC	Alive	Not Found	Unknown	NSE				0	1			132							2.12385							3				26			0	50				0
722511.39-2994970.77	1G-UH1013	1G-UH	2011	2012	2013		1013	0	CP	SC	Alive	Not Found	Alive					0		0		30		32					1.49136		1.51851					2		2		57		81		46		54		0
722373.44-2994679.52	4UG-HH1014	4UG-HH	2011	2012	2013	2014	1014	0	SP	CA	Alive	Dead	Dead	Dead				0	1			23							1.38021							2				28				45				0
722527.08-2994964.21	1G-UH1018	1G-UH	2011	2012	2013	2014	1018	0	CP	SC	Alive	Not Found	Unknown	NSE				0	1			18							1.27875							2				24			0	54				0
722395.26-2994675.22	4UG-HH1024	4UG-HH	2011	2012	2013	2014	1024	0	SP	CA	Alive	Not Found	Unknown	NSE				0	1			0							0							1				7			0	31				0
722531.08-2994961.04	1G-UH1025	1G-UH	2011	2012	2013	2014	1025	0	CP	SC	Alive	Not Found	Unknown	NSE				0	1			18							1.27875							2				42			0	50				0
722264.26-2994665.46	6UG-UH1028	6UG-UH	2011	2012	2013	2014	1028	0	SP	SC	Alive	Not Found	Unknown	NSE				0	1			1							0.30103							1				2			0	35				0
722365.12-2994688.78	4UG-HH1029	4UG-HH	2011	2012	2013	2014	1029	-1	SP	CA	Alive	Alive	Alive	Alive				0	0	0	0	7		3	6			3	0.90309		0.60206	0.845098			0.243038	1		1	1	7		23	17	30		41	50	0
722261.70-2994667.45	6UG-UH1032	6UG-UH	2011	2012	2013		1032	1032	SP	SC	Alive	Alive	Alive					0	0	0		13	13	16		0	3		1.14613	1.14613	1.23045		0	0.0843209		2	2	2		29	33	55		49	46	46		0	0
722531.44-2994967.32	1G-UH1034	1G-UH	2011	2012	2013	2014	1034	0	CP	SC	Alive	Not Found	Unknown	NSE				0	1			250							2.39967							4				85			0	68				0
722406.31-2994697.55	4UG-HH1041	4UG-HH	2011	2012	2013	2014	1041	-1	SP	CA	Alive	Dead	Dead	Dead				0	1			44							1.65321							2				37				42				1
722533.49-2994967.50	1G-UH1044	1G-UH	2011	2012	2013	2014	1044	0	CP	SC	Alive	Not Found	Unknown	Alive				0			0	340			353				2.53275			2.549				4			4	50			62	53			67	0
722404.04-2994700.99	4UG-HH1045	4UG-HH	2011	2012	2013	2014	1045	-1	SP	CA	Alive	Dead	Dead	Dead				0	1			20							1.32222							2
722522.24-2994957.40	1G-UH1052	1G-UH	2011	2012	2013	2014	1052	-1	CP	SC	Alive	Dead	Dead	Dead				0	1			87							1.94448							2				30				45				0
722264.69-2994669.08	6UG-UH1056	6UG-UH	2011	2012	2013	2014	1056	0	SP	SC	Alive	Not Found	Unknown	NSE				0	1			1							0.30103							1				2			0	41				0
722373.58-2994675.17	4UG-HH1061	4UG-HH	2011	2012	2013	2014	1061	0	SP	CA	Alive	Dead	Dead	Dead				0	1			18							1.27875							2				10				33				0
722374.96-2994672.72	4UG-HH1062	4UG-HH	2011	2012	2013	2014	1062	0	SP	CA	Alive	Dead	Dead	Dead				0	1			21							1.34242							2				12				24				0
722370.00-2994674.01	4UG-HH1062	4UG-HH	2011	2012	2013	2014	1062	0	SP	CA	Alive	Not Found	Unknown	NSE				0	1			49							1.69897							2				39			0	45				2
722530.40-2994965.06	1G-UH1070	1G-UH	2011	2012	2013	2014	1070	0	CP	SC	Alive	Not Found	Unknown	NSE				0	1			95							1.98227							2				30			0	57				0
722555.97-2995061.62	3G-LH5178	3G-LH	2011	2012	2013	2014	5178	5178	CP	CB	Alive	Alive	Alive	Alive				0	0	0	0	67	62	75	70	-5	13	-5	1.83251	1.79934	1.88081	1.85126	-0.0331684	0.081473	-0.0295552	2	2	2	2	31	38	46	25	51	49	54	51	2	4
722511.30-2994970.44	1G-UH1079	1G-UH	2011	2012	2013		1079	0	CP	SC	Alive	Not Found	Alive					0		0		18		23					1.27875		1.38021					2		2		32		55		36		40		0
722381.90-2994669.77	4UG-HH1087	4UG-HH	2011	2012	2013		1087	0	SP	CA	Alive	Not Found	Alive					0		0		6		14					0.845098		1.17609					1		2		15		27		34		93		0
722366.69-2994673.82	4UG-HH1094	4UG-HH	2011	2012	2013	2014	1094	0	SP	CA	Alive	Dead	Dead	Dead				0	1			40							1.61278							2				14				33				0
722370.65-2994675.52	4UG-HH1095	4UG-HH	2011	2012	2013	2014	1095	0	SP	CA	Alive	Dead	Dead	Dead				0	1			100							2.00432							3				26				44				3
722514.02-2994944.00	1G-UH1105	1G-UH	2011	2012	2013		1105	1105	CP	SC	Alive	Alive	Alive					0	0	0		1	2	1		1	-1		0.30103	0.477121	0.30103		0.176091	-0.176091		1	1	1		10	5	3		48	45	35		0	0
722511.63-2994943.75	1G-UH1109	1G-UH	2011	2012	2013		1109	1109	CP	SC	Alive	Alive	Dead					0	0	1		1	1			0			0.30103	0.30103			0			1	1			5	3			38	42			0	0
722517.97-2994951.57	1G-UH1113	1G-UH	2011	2012	2013		1113	1113	CP	SC	Alive	Alive	Alive					0	0	0		1	1	1		0	0		0.30103	0.30103	0.30103		0	0		1	1	1		5	5	3		40	48	39		0	0
722509.75-2994966.13	1G-UH1115	1G-UH	2011	2012	2013	2014	1115	-1	CP	SC	Alive	Dead	Dead	Dead				0	1			12							1.11394							2				26				41				0
722498.88-2994950.05	1G-UH1117	1G-UH	2011	2012	2013	2014	1117	0	CP	SC	Alive	Dead	Dead	Dead				0	1			190							2.28103							3				41				44				0
722514.67-2994945.05	1G-UH1118	1G-UH	2011	2012	2013		1118	1118	CP	SC	Alive	Alive	Unknown					0	0			3	2			-1			0.60206	0.477121			-0.124939			1	1				6				34			0	0
722515.80-2994951.16	1G-UH1120	1G-UH	2011	2012	2013		1120	1120	CP	SC	Alive	Alive	Unknown					0	0			2	1			-1			0.477121	0.30103			-0.176091			1	1				4				46			0	0
722513.59-2994944.20	1G-UH1121	1G-UH	2011	2012	2013		1121	1121	CP	SC	Alive	Alive	Alive					0	0	0		3	3	5		0	2		0.60206	0.60206	0.778151		0	0.176091		1	1	1			13	19			52	39		0	0
722512.58-2994943.51	1G-UH1125	1G-UH	2011	2012	2013		1125	1125	CP	SC	Alive	Alive	Alive					0	0	0		1	1	1		0	0		0.30103	0.30103	0.30103		0	0		1	1	1			1	0			36	47		0	0
722511.66-2994942.71	1G-UH1131	1G-UH	2011	2012	2013		1131	1131	CP	SC	Alive	Alive	Alive					0	0	0		1	1	0		0			0.30103	0.30103	0		0			1	1	1			17	10			47	41		0	0
722516.49-2994948.64	1G-UH1138	1G-UH	2011	2012	2013	2014	1138	0	CP	SC	Alive	Not Found	Unknown	NSE				0	1			2							0.477121							1				3			0	42				0
722518.19-2994951.46	1G-UH1141	1G-UH	2011	2012	2013	2014	1141	0	CP	SC	Alive	Not Found	Unknown	NSE				0	1			1							0.30103							1				3			0	40				0
722499.78-2994969.27	1G-UH1146	1G-UH	2011	2012	2013	2014	1146	0	CP	SC	Alive	Not Found	Unknown	NSE				0	1			3							0.60206							1				6			0	16				0
722511.36-2994945.92	1G-UH1160	1G-UH	2011	2012	2013		1160	1160	CP	SC	Alive	Alive	Alive					0	0	0		1	2	2		1	0		0.30103	0.477121	0.477121		0.176091	0		1	1	1		8	17	14		30	46	48		0	0
722511.09-2994944.61	1G-UH1161	1G-UH	2011	2012	2013		1161	1161	CP	SC	Alive	Alive	Dead					0	0	1		4	4			0			0.69897	0.69897			0			1	1			15	12			35	48			0	0
722522.50-2994957.78	1G-UH1164	1G-UH	2011	2012	2013	2014	1164	0	CP	SC	Alive	Dead	Dead	Dead				0	1			47							1.68124							2				22				46				0
722511.06-2994944.37	1G-UH1168	1G-UH	2011	2012	2013		1168	1168	CP	SC	Alive	Alive	Dead					0	0	1		2	1			-1			0.477121	0.30103			-0.176091			1	1			5	2			47	34			0	0
722519.35-2994955.02	1G-UH1195	1G-UH	2011	2012	2013	2014	1195	0	CP	SC	Alive	Not Found	Dead	NSE				0	1			3							0.60206							1				20			0	38				0
722507.33-2994950.52	1G-UH1195	1G-UH	2011	2012	2013	2014	1195	0	CP	SC	Alive	Not Found	Unknown	NSE				0	1			95							1.98227							2				22			0	44				0
722510.53-2994945.83	1G-UH1198	1G-UH	2011	2012	2013	2014	1198	0	CP	SC	Alive	Dead	Dead	Dead				0	1			3							0.60206							1				19				43				0
722515.57-2994949.63	1G-UH1200	1G-UH	2011	2012	2013	2014	1200	0	CP	SC	Alive	Dead	Dead	Dead				0	1			2							0.477121							1				10				38				0
722278.40-2994642.20	6UG-UH1205	6UG-UH	2011	2012	2013	2014	1205	0	SP	SC	Alive	Dead	Dead	Dead				0	1			130							2.11727							3				30				50				0
722525.59-2994965.15	1G-UH1206	1G-UH	2011	2012	2013	2014	1206	0	CP	SC	Alive	Not Found	Unknown	NSE				0	1			165							2.22011							3				49			0	52				0
722526.81-2994963.53	1G-UH1222	1G-UH	2011	2012	2013	2014	1222	0	CP	SC	Alive	Not Found	Unknown	NSE				0	1			290							2.46389							4				57			0	52				0
722302.84-2994648.89	6UG-UH1226	6UG-UH	2011	2012	2013	2014	1226	0	SP	SC	Alive	Not Found	Unknown	NSE				0	1			0							0							1				4			0	26				0
722528.34-2994965.93	1G-UH1228	1G-UH	2011	2012	2013	2014	1228	0	CP	SC	Alive	Not Found	Unknown	NSE				0	1			42							1.63347							2				39			0	51				0
722525.55-2994963.20	1G-UH1235	1G-UH	2011	2012	2013	2014	1235	0	CP	SC	Alive	Not Found	Unknown	NSE				0	1			118							2.07555							3				32			0	49				0
722373.36-2994689.70	4UG-HH1239	4UG-HH	2011	2012	2013	2014	1239	0	SP	CA	Alive	Dead	Dead	Dead				0	1			149							2.17609							3				23				44				0
722280.87-2994623.89	6UG-UH1253	6UG-UH	2011	2012	2013	2014	1253	0	SP	SC	Alive	Dead	Dead	Dead				0	1			110							2.04532							3				22				36				0
722508.55-2994968.35	1G-UH1258	1G-UH	2011	2012	2013	2014	1258	-1	CP	SC	Alive	Dead	Dead	Dead				0	1			83							1.92428							2				36				50				0
722287.38-2994653.07	6UG-UH1260	6UG-UH	2011	2012	2013	2014	1260	0	SP	SC	Alive	Not Found	Unknown	NSE				0	1			5							0.778151							1				8			0	31				0
722527.54-2994963.06	1G-UH1270	1G-UH	2011	2012	2013	2014	1270	0	CP	SC	Alive	Not Found	Unknown	NSE				0	1			130							2.11727							3				43			0	45				0
722524.76-2994966.26	1G-UH1271	1G-UH	2011	2012	2013	2014	1271	0	CP	SC	Alive	Not Found	Unknown	NSE				0	1			133							2.1271							3				20			0	42				0
722261.21-2994666.79	6UG-UH1277	6UG-UH	2011	2012	2013		1277	1277	SP	SC	Alive	Alive	Alive					0	0	0		1	1	5		0	4		0.30103	0.30103	0.778151		0	0.477121		1	1	1		1	2	5		20	26	35		0	0
722509.97-2994946.03	1G-UH1281	1G-UH	2011	2012	2013	2014	1281	0	CP	SC	Alive	Not Found	Unknown	NSE				0	1			1							0.30103							1				2			0	41				0
722367.25-2994693.29	4UG-HH1283	4UG-HH	2011	2012	2013	2014	1283	-1	SP	CA	Alive	Dead	Dead	Dead				0	1			3							0.60206							1				2				32				0
722365.59-2994689.71	4UG-HH1284	4UG-HH	2011	2012	2013	2014	1284	0	SP	CA	Alive	Dead	Dead	Dead				0	1			85							1.9345							2				23				42				0
722510.02-2994975.73	1G-UH1292	1G-UH	2011	2012	2013	2014	1292	0	CP	SC	Alive	Not Found	Unknown	NSE				0	1																					3			0	30				0
722367.38-2994694.44	4UG-HH1294	4UG-HH	2011	2012	2013	2014	1294	0	SP	CA	Alive	Dead	Dead	Dead				0	1			107							2.03342							3				26				55				3
722279.57-2994649.42	6UG-UH1296	6UG-UH	2011	2012	2013	2014	1296	0	SP	SC	Alive	Dead	Dead	Dead				0	1			14							1.17609							2				9				34				0
722527.36-2994962.96	1G-UH1300	1G-UH	2011	2012	2013	2014	1300	0	CP	SC	Alive	Not Found	Unknown	NSE				0	1			13							1.14613							2				59			0	52				0
722531.11-2994961.48	1G-UH1301	1G-UH	2011	2012	2013	2014	1301	0	CP	SC	Alive	Not Found	Unknown	NSE				0	1			25							1.41497							2				45			0	43				0
722276.32-2994649.51	6UG-UH1311	6UG-UH	2011	2012	2013	2014	1311	0	SP	SC	Alive	Dead	Dead	Dead				0	1			19							1.30103							2				13				38				0
722533.35-2994962.45	1G-UH1312	1G-UH	2011	2012	2013	2014	1312	0	CP	SC	Alive	Not Found	Unknown	NSE				0	1			15							1.20412							2				50			0	55				0
722292.53-2994654.08	6UG-UH1321	6UG-UH	2011	2012	2013	2014	1321	-1	SP	SC	Alive	Dead	Dead	Dead				0	1			142							2.15534							3				22				42				0
722261.38-2994666.50	6UG-UH1322	6UG-UH	2011	2012	2013	2014	1322	1322	SP	SC	Alive	Alive	Alive	Alive				0	0	0	0	1	1	2	2	0	1	0	0.30103	0.30103	0.477121	0.477121	0	0.176091	0	1	1	1	1	3	1	2	9	42	15	33	45	0	0
722268.51-2994645.75	6UG-UH1335	6UG-UH	2011	2012	2013	2014	1335	0	SP	SC	Alive	Dead	Dead	Dead				0	1			8							0.954243							1				10				20				0
722513.24-2994969.73	1G-UH1339	1G-UH	2011	2012	2013		1339	0	CP	SC	Alive	Not Found	Alive					0		0		141		141					2.15229		2.15229					3		3		37		47		52		68		0
722266.61-2994647.22	6UG-UH1340	6UG-UH	2011	2012	2013	2014	1340	0	SP	SC	Alive	Dead	Dead	Dead				0	1			25							1.41497							2				14				40				0
722306.55-2994658.56	6UG-UH1356	6UG-UH	2011	2012	2013	2014	1356	-1	SP	SC	Alive	Dead	Dead	Dead				0	1			35							1.5563							2				20				40				0
722269.56-2994646.63	6UG-UH1365	6UG-UH	2011	2012	2013	2014	1365	0	SP	SC	Alive	Dead	Dead	Dead				0	1			22							1.36173							2				15				34				0
722303.74-2994663.14	6UG-UH1368	6UG-UH	2011	2012	2013	2014	1368	-1	SP	SC	Alive	Dead	Dead	Dead				0	1			30							1.49136							2				19				40				0
722294.31-2994652.79	6UG-UH1378	6UG-UH	2011	2012	2013	2014	1378	-1	SP	SC	Alive	Dead	Dead	Dead				0	1			36							1.5682							2				19				42				0
722261.94-2994667.52	6UG-UH1385	6UG-UH	2011	2012	2013	2014	1385	0	SP	SC	Alive	Not Found	Unknown	NSE				0	1			1							0.30103							1				3			0	43				0
722530.57-2994960.59	1G-UH1408	1G-UH	2011	2012	2013	2014	1408	0	CP	SC	Alive	Not Found	Unknown	NSE				0	1			34							1.54407							2				34			0	39				0
722528.62-2994959.67	1G-UH1411	1G-UH	2011	2012	2013	2014	1411	0	CP	SC	Alive	Not Found	Unknown	NSE				0	1			3							0.60206							1				19			0	46				0
722281.13-2994649.73	6UG-UH1420	6UG-UH	2011	2012	2013	2014	1420	-1	SP	SC	Alive	Dead	Dead	Dead				0	1			38							1.59106							2				21				38				0
722507.32-2994967.73	1G-UH1429	1G-UH	2011	2012	2013	2014	1429	-1	CP	SC	Alive	Dead	Dead	Dead				0	1			35							1.5563							2				13				22				0
722287.81-2994644.75	6UG-UH1430	6UG-UH	2011	2012	2013		1430	0	SP	SC	Alive	Not Found	Alive					0		0		0							0							1				4			0	33				0
722277.43-2994622.00	6UG-UH1432	6UG-UH	2011	2012	2013		1432	1432	SP	SC	Alive	Alive	Dead					0	0	1		6	8			2			0.845098	0.954243			0.109144			1	1			18	7			29	27			0	0
722533.82-2994966.10	1G-UH1434	1G-UH	2011	2012	2013	2014	1434	0	CP	SC	Alive	Not Found	Unknown	NSE				0	1			290							2.46389							4				50			0	52				0
722502.18-2994965.42	1G-UH1436	1G-UH	2011	2012	2013	2014	1436	-1	CP	SC	Alive	Dead	Dead	Dead				0	1			28							1.4624							2				13				38				0
722295.30-2994655.58	6UG-UH1437	6UG-UH	2011	2012	2013	2014	1437	-1	SP	SC	Alive	Dead	Dead	Dead				0	1			11							1.07918							2				4				33				0
722514.06-2994970.99	1G-UH1440	1G-UH	2011	2012	2013		1440	0	CP	SC	Alive	Not Found	Alive					0		0		14		14					1.17609		1.17609					2		2		24		39		37		44		0
722521.20-2994956.01	1G-UH1445	1G-UH	2011	2012	2013	2014	1445	0	CP	SC	Alive	Dead	Dead	Dead				0	1			74							1.87506							2				20				45				0
722524.95-2994963.77	1G-UH1461	1G-UH	2011	2012	2013	2014	1461	0	CP	SC	Alive	Not Found	Unknown	NSE				0	1			150							2.17898							3				43			0	45				0
722527.53-2994964.78	1G-UH1466	1G-UH	2011	2012	2013	2014	1466	0	CP	SC	Alive	Not Found	Unknown	NSE				0	1			260							2.41664							4				50			0	55				0
722305.06-2994661.30	6UG-UH1473	6UG-UH	2011	2012	2013	2014	1473	-1	SP	SC	Alive	Dead	Dead	Dead				0	1			141							2.15229							3				19				46				0
722510.77-2994970.30	1G-UH1478	1G-UH	2011	2012	2013		1478	0	CP	SC	Alive	Not Found	Alive					0		0		43		49					1.64345		1.69897					2		2		51		83		56		65		0
722527.54-2994963.27	1G-UH1482	1G-UH	2011	2012	2013	2014	1482	0	CP	SC	Alive	Not Found	Unknown	NSE				0	1			265							2.42488							4				60			0	55				0
	6UG-UH1489	6UG-UH					1489		SP	SC
	6UG-UH1491	6UG-UH					1491		SP	SC
722524.69-2994953.33	1G-UH1502	1G-UH			2013		1502	1502	CP	SC			Alive			1				0				2							0.477121							1				1	0			40
	1G-UH1503	1G-UH				2014	1503		CP	SC				Alive							0				2							0.477121							1				70				40
	1G-UH1504	1G-UH				2014	1504		CP	SC				Alive							0				1							0.30103							1				5				27
	1G-UH1505	1G-UH				2014	1505		CP	SC				Alive							0				1							0.30103							1				11				47
	1G-UH1506	1G-UH				2014	1506		CP	SC				Alive							0				1							0.30103							1				5				30
722317.44-2994656.38	5UG-LH1507	5UG-LH			2013		1507	1507	SP	CB			Alive			1				0				0							0							1				1	0			38
	1G-UH1507	1G-UH				2014	1507		CP	SC				Alive							0				2							0.477121							1				15				40
	1G-UH1508	1G-UH				2014	1508		CP	SC				Alive							0				2							0.477121							1				10				45
	1G-UH1509	1G-UH					1509		CP	SC
722554.88-2995061.97	3G-LH5179	3G-LH	2011	2012	2013	2014	5179	5179	CP	CB	Alive	Alive	Alive	Alive				0	0	0	0	127	135	135	135	8	0	0	2.10721	2.13354	2.13354	2.13354	0.0263289	0	0	3	3	3	3	33	34	44	30	47	47	52	50	3	2
722559.03-2995063.99	3G-LH5180	3G-LH	2011	2012	2013	2014	5180	5180	CP	CB	Alive	Alive	Alive	Alive				0	0	0	0	24	18	21	20	-6	3	-1	1.39794	1.27875	1.34242	1.32222	-0.119186	0.0636691	-0.0202034	2	2	2	2	69	67	80	47	54	56	58	58	1	1
722314.01-2994657.44	5UG-LH1512	5UG-LH			2013		1512	1512	SP	CB			Alive			1				0				1							0.30103							1				46	0
722319.17-2994659.35	5UG-LH1513	5UG-LH			2013		1513	1513	SP	CB			Alive			1				0				1							0.30103							1				2	0			31
	4UG-HH1514	4UG-HH					1514		SP	CA
	2G-HH1521	2G-HH				2014	1521		CP	CA				Recluta			1								2							0.477121							1				0				32
	2G-HH1528	2G-HH				2014	1528		CP	CA				Recluta			1								3							0.60206							1				4				48
	2G-HH1530	2G-HH				2014	1530		CP	CA				Recluta			1								1							0.30103							1				2				30
	1G-UH1531	1G-UH				2014	1531		CP	SC				Recluta			1								1							0.30103							1				2				10
	1G-UH1532	1G-UH				2014	1532		CP	SC				Recluta			1								2							0.477121							1				0				45
722488.93-2994929.20	1G-UH1533	1G-UH	2011	2012	2013	2014	1533	0	CP	SC	Alive	Not Found	Unknown	Alive				0			0	228			233				2.35984			2.36922				3			3	27			62	58			59	0
722559.68-2995003.75	2G-HH1601	2G-HH			2013		1601	1601	CP	CA			Alive			1				0				2							0.477121							1				0	0			49
722282.97-2994643.72	6UG-UH1606	6UG-UH			2013		1606	1606	SP	SC			Alive			1				0				2							0.477121							1				1	0			33
722282.68-2994647.91	6UG-UH1607	6UG-UH			2013		1607	1607	SP	SC			Alive			1				0				2							0.477121							1				0	0			14
	4UG-HH1608	4UG-HH				2014	1608		SP	CA				Alive							0				25							1.41497							2				44				55
	1G-UH1625	1G-UH				2014	1625		CP	SC				Recluta			1								0							0							1				2				41
	6UG-UH1630	6UG-UH				2014	1630		SP	SC				Recluta			1								2							0.477121							1				1				17
	6UG-UH1631	6UG-UH				2014	1631		SP	SC				Recluta			1								4							0.69897							1				3				40
	6UG-UH1633	6UG-UH				2014	1633		SP	SC				Recluta			1								0							0							1				0				23
	6UG-UH1634	6UG-UH				2014	1634		SP	SC				Recluta			1								0							0							1				7				41
	6UG-UH1635	6UG-UH				2014	1635		SP	SC				Recluta			1								1							0.30103							1				1				20
	6UG-UH1636	6UG-UH				2014	1636		SP	SC				Recluta			1								1							0.30103							1				3				28
	6UG-UH1637	6UG-UH				2014	1637		SP	SC				Recluta			1								0							0							1				0				0
	6UG-UH1638	6UG-UH				2014	1638		SP	SC				Recluta			1								0							0							1				1				32
	6UG-UH1639	6UG-UH				2014	1639		SP	SC				Recluta			1								0							0							1				2				30
	6UG-UH1640	6UG-UH				2014	1640		SP	SC				Recluta			1								0							0							1				3				24
	6UG-UH1641	6UG-UH				2014	1641		SP	SC				Recluta			1								0							0							1				4				35
	6UG-UH1642	6UG-UH				2014	1642		SP	SC				Recluta			1								0							0							1				1				12
	6UG-UH1643	6UG-UH				2014	1643		SP	SC				Recluta			1								0							0							1				3				36
	6UG-UH1644	6UG-UH				2014	1644		SP	SC				Recluta			1								0							0							1				3				53
	6UG-UH1645	6UG-UH				2014	1645		SP	SC				Recluta			1								0							0							1				3				30
	6UG-UH1646	6UG-UH				2014	1646		SP	SC				Recluta			1								1							0.30103							1				2				17
	6UG-UH1647	6UG-UH				2014	1647		SP	SC				Recluta			1								0							0							1				1				18
	6UG-UH1648	6UG-UH				2014	1648		SP	SC				Recluta			1								0							0							1				1				16
	6UG-UH1649	6UG-UH				2014	1649		SP	SC				Recluta			1								0							0							1				1				20
	6UG-UH1650	6UG-UH				2014	1650		SP	SC				Recluta			1								0							0							1				3				18
	2G-HH1695	2G-HH				2014	1695		CP	CA				Alive							0				15							1.20412							2				26				35
	1G-UH1696	1G-UH				2014	1696		CP	SC				Alive							0				36							1.5682							2				56				55
	1G-UH1697	1G-UH				2014	1697		CP	SC				Alive							0				16							1.23045							2				40				43
	1G-UH1698	1G-UH				2014	1698		CP	SC				Alive							0				30							1.49136							2				46				48
	1G-UH1699	1G-UH				2014	1699		CP	SC				Alive							0				14							1.17609							2				28				37
	1G-UH1700	1G-UH				2014	1700		CP	SC				Alive							0				150							2.17898							3				46				62
722261.80-2994668.23	6UG-UH1701	6UG-UH			2013		1701	1701	SP	SC			Alive			1				0				1							0.30103							1				1	0			24
722262.36-2994666.88	6UG-UH1702	6UG-UH			2013		1702	1702	SP	SC			Alive			1				0				1							0.30103							1				2	0			26
	4UG-HH1742	4UG-HH				2014	1742		SP	CA				Alive							0				1							0.30103							1				2				42
	2G-HH1743	2G-HH				2014	1743		CP	CA				Recluta			1								1							0.30103							1				5				20
	2G-HH1744	2G-HH				2014	1744		CP	CA				Recluta			1								1							0.30103							1				3				29
722379.08-2994680.02	6UG-UH1751	6UG-UH			2013		1751	1751	SP	SC			Alive							0				19							1.30103							2				50				49
	4UG-HH1752	4UG-HH				2014	1752		SP	CA				Alive							0				15							1.20412							2				72				62
	4UG-HH1754	4UG-HH				2014	1754		SP	CA				Alive							0				7							0.90309							1				70				73
	4UG-HH1757	4UG-HH				2014	1757		SP	CA				Alive							0				16							1.23045							2				70				60
722282.04-2994648.66	6UG-UH1758	6UG-UH			2013	2014	1758	1758	SP	SC			Alive	Alive						0	0			315	315			0			2.49969	2.49969			0			4	4			55	50			60	53
722265.98-2994663.26	6UG-UH1761	6UG-UH			2013		1761	1761	SP	SC			Alive			1				0				1							0.30103							1				1	0			31
722266.17-2994662.99	6UG-UH1762	6UG-UH			2013		1762	1762	SP	SC			Alive			1				0				1							0.30103							1				1	0			27
722266.22-2994663.18	6UG-UH1763	6UG-UH			2013		1763	1763	SP	SC			Alive			1				0				1							0.30103							1				1	0			30
722266.45-2994662.98	6UG-UH1764	6UG-UH			2013	2014	1764	1764	SP	SC			Alive	Dead		1				0	1			1							0.30103							1				1				30
722267.16-2994662.30	6UG-UH1765	6UG-UH			2013		1765	1765	SP	SC			Alive			1				0				2							0.477121							1				1	0			20
722265.92-2994662.57	6UG-UH1766	6UG-UH			2013		1766	1766	SP	SC			Alive			1				0				2							0.477121							1				2	0			25
722265.92-2994662.79	6UG-UH1767	6UG-UH			2013		1767	1767	SP	SC			Alive			1				0																						1	0			18
722266.69-2994663.45	6UG-UH1768	6UG-UH			2013		1768	1768	SP	SC			Alive			1				0				1							0.30103							1				1	0			27
722266.11-2994662.52	6UG-UH1769	6UG-UH			2013		1769	1769	SP	SC			Alive			1				0				1							0.30103							1				1	0			21
722266.72-2994661.33	6UG-UH1771	6UG-UH			2013	2014	1771	1771	SP	SC			Alive	Dead		1				0	1			1							0.30103							1				1				21
722267.12-2994661.31	6UG-UH1772	6UG-UH			2013	2014	1772	1772	SP	SC			Alive	Dead		1				0	1			1							0.30103							1				1				25
722266.90-2994661.70	6UG-UH1773	6UG-UH			2013	2014	1773	1773	SP	SC			Alive	Dead		1				0	1			1							0.30103							1				1				15
722266.47-2994661.71	6UG-UH1774	6UG-UH			2013	2014	1774	1774	SP	SC			Alive	Dead		1				0	1			1							0.30103							1				1				22
722266.54-2994660.90	6UG-UH1775	6UG-UH			2013	2014	1775	1775	SP	SC			Alive	Dead		1				0	1			1							0.30103							1				1				18
722267.03-2994661.16	6UG-UH1776	6UG-UH			2013	2014	1776	1776	SP	SC			Alive	Dead		1				0	1			1							0.30103							1				1				20
722267.15-2994662.20	6UG-UH1777	6UG-UH			2013	2014	1777	1777	SP	SC			Alive	Dead		1				0	1			1							0.30103							1				1				20
722265.84-2994660.96	6UG-UH1778	6UG-UH			2013	2014	1778	1778	SP	SC			Alive	Alive		1				0	0			1	2			1			0.30103	0.477121			0.176091			1	1			1	3			30	9
722267.77-2994667.41	6UG-UH1780	6UG-UH			2013		1780	1780	SP	SC			Alive			1				0				1							0.30103							1				2	0			36
722262.38-2994668.39	6UG-UH1781	6UG-UH			2013		1781	1781	SP	SC			Alive			1				0				0							0							1				1	0			21
722261.75-2994667.13	6UG-UH1782	6UG-UH			2013		1782	1782	SP	SC			Alive			1				0				2							0.477121							1				12	0			30
722263.75-2994666.47	6UG-UH1783	6UG-UH			2013		1783	1783	SP	SC			Alive			1				0				1							0.30103							1				3	0			30
722261.99-2994667.03	6UG-UH1784	6UG-UH			2013		1784	1784	SP	SC			Alive			1				0				4							0.69897							1				1	0			39
722262.48-2994667.24	6UG-UH1785	6UG-UH			2013		1785	1785	SP	SC			Alive			1				0				1							0.30103							1				1	0			30
	6UG-UH1787	6UG-UH				2014	1787		SP	SC				Alive							0				1							0.30103							1				4				35
	6UG-UH1789	6UG-UH					1789		SP	SC
	6UG-UH1790	6UG-UH				2014	1790		SP	SC				Alive							0				8							0.954243							1				36				42
722260.51-2994662.35	6UG-UH1791	6UG-UH			2013	2014	1791	1791	SP	SC			Alive	Alive		1				0	0			6	14			8			0.845098	1.17609			0.330993			1	2			5	34			35	31
722260.81-2994661.79	6UG-UH1793	6UG-UH			2013		1793	1793	SP	SC			Alive			1				0				2							0.477121							1				3	0			30
722259.86-2994661.59	6UG-UH1794	6UG-UH			2013		1794	1794	SP	SC			Alive			1				0				4							0.69897							1				12	0			32
722257.69-2994665.12	6UG-UH1795	6UG-UH			2013		1795	1795	SP	SC			Alive			1				0				2							0.477121							1				3	0			20
722537.47-2995003.72	2G-HH1798	2G-HH			2013		1798	1798	CP	CA			Alive			1				0				1							0.30103							1				5	0			34
	2G-HH1799	2G-HH				2014	1799		CP	CA				Alive							0				5							0.778151							1				26				32
722298.81-2994657.90	6UG-UH5001	6UG-UH	2011	2012	2013	2014	5001	5001	SP	SC	Alive	Alive	Alive	Alive				0	0	0	0	25	24	23	25	-1	-1	2	1.41497	1.39794	1.38021	1.41497	-0.0170333	-0.0177288	0.0347621	2	2	2	2	24	26	73	65	41	52	52	55	0	0
722303.31-2994662.75	6UG-UH5002	6UG-UH	2011	2012	2013	2014	5002	5002	SP	SC	Alive	Alive	Alive	Alive				0	0	0	0	35	38	35	38	3	-3	3	1.5563	1.59106	1.5563	1.59106	0.0347621	-0.0347621	0.0347621	2	2	2	2	25	19	36	41	46	39	38	48	0	0
722303.90-2994652.64	6UG-UH5004	6UG-UH		2012	2013		5004	5004	SP	SC		Alive	Dead		1				0	1			1							0.30103							1				10				40
722296.19-2994648.67	6UG-UH5005	6UG-UH	2011	2012	2013	2014	5005	5005	SP	SC	Alive	Alive	Alive	Alive				0	0	0	0	51	44	44	50	-7	0	6	1.716	1.65321	1.65321	1.70757	-0.0627908	0	0.0543577	2	2	2	2	29	36	58	60	51	50	60	60	0
722295.18-2994647.74	6UG-UH5006	6UG-UH	2011	2012	2013	2014	5006	5006	SP	SC	Alive	Alive	Alive	Alive				0	0	0	0	30	27	28	30	-3	1	2	1.49136	1.44716	1.4624	1.49136	-0.0442037	0.01524	0.0289637	2	2	2	2	25	50	63	66	45	43	49	50	0	0
722294.14-2994648.56	6UG-UH5007	6UG-UH	2011	2012	2013	2014	5007	5007	SP	SC	Alive	Alive	Alive	Alive				0	0	0	0	15	27	28	27	12	1	-1	1.20412	1.44716	1.4624	1.44716	0.243038	0.01524	-0.01524	2	2	2	2	22	43	58	53	52	55	55	62	0	0
722294.25-2994648.72	6UG-UH5008	6UG-UH	2011	2012	2013	2014	5008	5008	SP	SC	Alive	Alive	Alive	Alive				0	0	0	0	58	49	52	63	-9	3	11	1.77085	1.69897	1.72428	1.80618	-0.071882	0.0253059	0.0819041	2	2	2	2	30	36	43	57	51	51	51	54	0	0
722294.55-2994649.69	6UG-UH5009	6UG-UH	2011	2012	2013	2014	5009	5009	SP	SC	Alive	Alive	Alive	Alive				0	0	0	0	138	138	132	138	0	-6	6	2.14301	2.14301	2.12385	2.14301	0	-0.0191632	0.0191632	3	3	3	3	36	26	39	55	41	42	50	52	0	0
722295.30-2994650.34	6UG-UH5010	6UG-UH	2011	2012	2013	2014	5010	5010	SP	SC	Alive	Alive	Alive	Alive				0	0	0	0	35	32	31	30	-3	-1	-1	1.5563	1.51851	1.50515	1.49136	-0.0377886	-0.013364	-0.0137883	2	2	2	2	20	19	45	42	41	37	44	47	0	0
722292.82-2994649.06	6UG-UH5011	6UG-UH	2011	2012	2013	2014	5011	5011	SP	SC	Alive	Alive	Alive	Alive				0	0	0	0	21	19	22	20	-2	3	-2	1.34242	1.30103	1.36173	1.32222	-0.0413927	0.0606978	-0.0395085	2	2	2	2	23	50	51	47	37	37	44	42	0	0
722292.95-2994648.02	6UG-UH5012	6UG-UH	2011	2012	2013	2014	5012	5012	SP	SC	Alive	Alive	Alive	Alive				0	0	0	0	25	27	39	39	2	12	0	1.41497	1.44716	1.60206	1.60206	0.0321847	0.154902	0	2	2	2	2	36	60	72	80	48	52	59	60	0	0
722292.57-2994648.47	6UG-UH5013	6UG-UH	2011	2012	2013	2014	5013	5013	SP	SC	Alive	Alive	Alive	Alive				0	0	0	0	29	22	25	30	-7	3	5	1.47712	1.36173	1.41497	1.49136	-0.115393	0.0532455	0.0763883	2	2	2	2	38	25	62	67	54	50	51	56	0	0
722294.29-2994648.82	6UG-UH5014	6UG-UH	2011	2012	2013		5014	5014	SP	SC	Alive	Alive	Alive					0	0	0		1	2	3		1	1		0.30103	0.477121	0.60206		0.176091	0.124939		1	1	1		3	10	8	0	36	39	40		0	0
722292.60-2994645.69	6UG-UH5015	6UG-UH	2011	2012	2013	2014	5015	5015	SP	SC	Alive	Alive	Alive	Alive				0	0	0	0	20	20	24	20	0	4	-4	1.32222	1.32222	1.39794	1.32222	0	0.0757207	-0.0757207	2	2	2	2	37	44	53	63	52	40	50	54	0	0
722292.88-2994645.61	6UG-UH5016	6UG-UH		2012	2013	2014	5016	5016	SP	SC		Alive	Alive	Alive					0	0	0		294	308	310		14	2		2.46982	2.48996	2.49276		0.0201365	0.00280191		4	4	4		46	57	50		50	57	55		0
722296.45-2994643.81	6UG-UH5018	6UG-UH	2011	2012	2013	2014	5018	5018	SP	SC	Alive	Alive	Alive	Alive				0	0	0	0	57	54	57	54	-3	3	-3	1.76343	1.74036	1.76343	1.74036	-0.0230653	0.0230653	-0.0230653	2	2	2	2	25	23	43	48	52	47	46	48	0	0
722295.02-2994656.34	6UG-UH5019	6UG-UH	2011	2012	2013	2014	5019	5019	SP	SC	Alive	Alive	Alive	Alive				0	0	0	0	21	26	25	25	5	-1	0	1.34242	1.43136	1.41497	1.41497	0.0889411	-0.0163904	0	2	2	2	2	33	50	70	70	45	49	51	54	0
722294.15-2994653.46	6UG-UH5020	6UG-UH	2011	2012	2013	2014	5020	5020	SP	SC	Alive	Alive	Alive	Alive				0	0	0	0	28	28	29	30	0	1	1	1.4624	1.4624	1.47712	1.49136	0	0.0147233	0.0142404	2	2	2	2	31	25	58	60	44	50	51	51	0	0
722288.86-2994652.38	6UG-UH5021	6UG-UH	2011	2012	2013	2014	5021	5021	SP	SC	Alive	Alive	Alive	Dead				0	0	0	1	87	81	79		-6	-2		1.94448	1.91381	1.90309		-0.0306688	-0.0107239		2	2	2		25	31	14		46	42	33		0	0
722285.53-2994655.37	6UG-UH5022	6UG-UH	2011	2012	2013	2014	5022	5022	SP	SC	Alive	Alive	Alive	Alive				0	0	0	0	68	64	65	67	-4	1	2	1.83885	1.81291	1.81954	1.83251	-0.0259357	0.00663058	0.012965	2	2	2	2	31	47	54	56	59	51	53	55	0	0
722287.73-2994655.04	6UG-UH5024	6UG-UH	2011	2012	2013	2014	5024	5024	SP	SC	Alive	Alive	Alive	Alive				0	0	0	0	39	39	40	40	0	1	0	1.60206	1.60206	1.61278	1.61278	0	0.0107239	0	2	2	2	2	13	16	37	29	39	40	44	40	0	0
722288.63-2994653.29	6UG-UH5025	6UG-UH	2011	2012	2013	2014	5025	5025	SP	SC	Alive	Alive	Alive	Alive				0	0	0	0	36	34	36	36	-2	2	0	1.5682	1.54407	1.5682	1.5682	-0.0241337	0.0241337	0	2	2	2	2	37	44	47	52	60	58	69	60	0	0
722288.90-2994658.17	6UG-UH5027	6UG-UH	2011	2012	2013	2014	5027	5027	SP	SC	Alive	Alive	Alive	Alive				0	0	0	0	13	15	20	25	2	5	5	1.14613	1.20412	1.32222	1.41497	0.0579919	0.118099	0.0927541	2	2	2	2	46	90	10	102		47	54	55	0	0
722289.50-2994659.27	6UG-UH5028	6UG-UH	2011	2012	2013	2014	5028	5028	SP	SC	Alive	Alive	Alive	Alive				0	0	0	0	149	154	160	157	5	6	-3	2.17609	2.19033	2.20683	2.19866	0.0142404	0.0164942	-0.00816879	3	3	3	3	39	40	45	50	48	52	56	55	0	0
722290.12-2994658.64	6UG-UH5029	6UG-UH	2011	2012	2013	2014	5029	5029	SP	SC	Alive	Alive	Alive	Alive				0	0	0	0	25	27	25	30	2	-2	5	1.41497	1.44716	1.41497	1.49136	0.0321847	-0.0321847	0.0763883	2	2	2	2	35	46	70	32	60	54	63	60	0	0
722290.48-2994657.15	6UG-UH5030	6UG-UH	2011	2012	2013	2014	5030	5030	SP	SC	Alive	Alive	Alive	Alive				0	0	0	0	3	5	9	10	2	4	1	0.60206	0.778151	1	1.04139	0.176091	0.221849	0.0413927	1	1	1	2	48	61	55	93	48	46	52	52	0	0
722291.99-2994657.14	6UG-UH5031	6UG-UH	2011	2012	2013	2014	5031	5031	SP	SC	Alive	Alive	Alive	Alive				0	0	0	0	125	131	128	130	6	-3	2	2.10037	2.12057	2.11059	2.11727	0.0202034	-0.00998422	0.00668159	3	3	3	3	33	20	35	37	52	53	56	55	0	0
722294.59-2994657.50	6UG-UH5032	6UG-UH	2011	2012	2013	2014	5032	5032	SP	SC	Alive	Alive	Alive	Alive				0	0	0	0	15	25	29	30	10	4	1	1.20412	1.41497	1.47712	1.49136	0.210853	0.0621479	0.0142404	2	2	2	2	28	50	71	33	42	50	52	54	0	0
722292.96-2994661.70	6UG-UH5033	6UG-UH	2011	2012	2013	2014	5033	5033	SP	SC	Alive	Alive	Alive	Alive				0	0	0	0	129	125	132	132	-4	7	0	2.11394	2.10037	2.12385	2.12385	-0.0135728	0.0234811	0	3	3	3	3	34	37	44	44	54	50	58	55	0	0
722260.70-2994650.34	6UG-UH5034	6UG-UH		2012	2013		5034	5034	SP	SC		Alive	Dead		1				0	1			2							0.477121							1				3				17
722258.41-2994661.54	6UG-UH5035	6UG-UH	2011	2012	2013	2014	5035	5035	SP	SC	Alive	Alive	Alive	Alive				0	0	0	0	3	3	8	9	0	5	1	0.60206	0.60206	0.954243	1	0	0.352183	0.0457575	1	1	1	1	35	19	50	54	38	49	45	48	0	0
722260.32-2994649.37	6UG-UH5036	6UG-UH		2012	2013	2014	5036	5036	SP	SC		Alive	Alive	NSE	1				0	0			1	1			0			0.30103	0.30103			0			1	1			2	1			17	20			0
722259.58-2994651.23	6UG-UH5037	6UG-UH		2012	2013		5037	5037	SP	SC		Alive	Dead		1				0	1			7							0.90309							1				2				36
722259.60-2994650.62	6UG-UH5038	6UG-UH		2012	2013		5038	5038	SP	SC		Alive	Dead		1				0	1			10							1.04139							2				2				39				0
722260.96-2994649.19	6UG-UH5039	6UG-UH		2012	2013		5039	5039	SP	SC		Alive	Dead		1				0	1			8							0.954243							1				2				36				0
722260.44-2994650.12	6UG-UH5040	6UG-UH		2012	2013		5040	5040	SP	SC		Alive	Dead		1				0	1			7							0.90309							1				2				41				0
722260.97-2994647.76	6UG-UH5041	6UG-UH		2012	2013		5041	5041	SP	SC		Alive	Dead		1				0	1			4							0.69897							1				2				36				0
722260.94-2994649.12	6UG-UH5042	6UG-UH		2012	2013		5042	5042	SP	SC		Alive	Dead		1				0	1			5							0.778151							1				2				37				0
722261.72-2994646.64	6UG-UH5043	6UG-UH		2012	2013		5043	5043	SP	SC		Alive	Dead		1				0	1			2							0.477121							1				2				20				0
722261.35-2994647.01	6UG-UH5044	6UG-UH		2012	2013		5044	5044	SP	SC		Alive	Dead		1				0	1			1							0.30103							1				2				6				0
722332.99-2994651.06	5UG-LH5045	5UG-LH	2011	2012	2013	2014	5045	5045	SP	CB	Alive	Alive	Alive	Alive				0	0	0	0	14	14	15	17	0	1	2	1.17609	1.17609	1.20412	1.25527	0	0.0280287	0.0511525	2	2	2	2	32	36	60	67	47	54	58	60	1	6
722335.24-2994650.99	5UG-LH5046	5UG-LH	2011	2012	2013	2014	5046	5046	SP	CB	Alive	Alive	Alive	Alive				0	0	0	0	24	20	25	24	-4	5	-1	1.39794	1.32222	1.41497	1.39794	-0.0757207	0.0927541	-0.0170333	2	2	2	2	39	34	76	67	50	60	70	60	1	4
722334.53-2994651.91	5UG-LH5047	5UG-LH	2011	2012	2013	2014	5047	5047	SP	CB	Alive	Alive	Alive	Alive				0	0	0	0	110	113	110	116	3	-3	6	2.04532	2.0569	2.04532	2.06819	0.0115819	-0.0115819	0.0228629	3	3	3	3	33	18	43	39	58	49	57	52	2	6
722332.20-2994651.76	5UG-LH5048	5UG-LH	2011	2012	2013	2014	5048	5048	SP	CB	Alive	Alive	Alive	Alive				0	0	0	0	20	22	24	24	2	2	0	1.32222	1.36173	1.39794	1.39794	0.0395085	0.0362122	0	2	2	2	2	32	20	47	46	51	50	55	60	1	4
722333.81-2994652.01	5UG-LH5049	5UG-LH	2011	2012	2013	2014	5049	5049	SP	CB	Alive	Alive	Alive	Alive				0	0	0	0	3	5	3	3	2	-2	0	0.60206	0.778151	0.60206	0.60206	0.176091	-0.176091	0	1	1	1	1	20	20	44	43	46	45	46	45	0	0
722337.56-2994649.75	5UG-LH5050	5UG-LH	2011	2012	2013	2014	5050	5050	SP	CB	Alive	Alive	Alive	Alive				0	0	0	0	24	20	17	18	-4	-3	1	1.39794	1.32222	1.25527	1.27875	-0.0757207	-0.0669468	0.0234811	2	2	2	2	42	30	60	48	49	46	49	50	0	0
722337.73-2994649.99	5UG-LH5051	5UG-LH	2011	2012	2013	2014	5051	5051	SP	CB	Alive	Alive	Alive	Alive				0	0	0	0	15	14	14	14	-1	0	0	1.20412	1.17609	1.17609	1.17609	-0.0280287	0	0	2	2	2	2	15	15	23	20	38	24	29	34	0	0
722339.38-2994652.25	5UG-LH5052	5UG-LH	2011	2012	2013	2014	5052	5052	SP	CB	Alive	Alive	Alive	Alive				0	0	0	0	26	18	24	24	-8	6	0	1.43136	1.27875	1.39794	1.39794	-0.15261	0.119186	0	2	2	2	2	36	44	58	60	48	52	54	59	0	0
722337.54-2994654.39	5UG-LH5053	5UG-LH	2011	2012	2013	2014	5053	5053	SP	CB	Alive	Alive	Alive	Alive				0	0	0	0	56	59	63	63	3	4	0	1.75587	1.77815	1.80618	1.80618	0.0222764	0.0280287	0	2	2	2	2	35	26	38	43	53	50	56	54	0	5
722341.08-2994655.74	5UG-LH5055	5UG-LH	2011	2012	2013	2014	5055	5055	SP	CB	Alive	Alive	Alive	Alive				0	0	0	0	16	17	18	18	1	1	0	1.23045	1.25527	1.27875	1.27875	0.0248236	0.0234811	0	2	2	2	2	25	42	37	58	43	42	26	44	0
722341.14-2994658.89	5UG-LH5056	5UG-LH	2011	2012	2013	2014	5056	5056	SP	CB	Alive	Alive	Alive	Alive				0	0	0	0	19	16	24	24	-3	8	0	1.30103	1.23045	1.39794	1.39794	-0.0705811	0.167491	0	2	2	2	2	35	39	50	58	57	56	56	53	0	0
722343.07-2994655.81	5UG-LH5057	5UG-LH	2011	2012	2013	2014	5057	5057	SP	CB	Alive	Alive	Alive	Alive				0	0	0	0	26	23	28	32	-3	5	4	1.43136	1.38021	1.4624	1.51851	-0.0511525	0.0821868	0.0561159	2	2	2	2	39	30	82	63	45	46	53	53	0	0
722344.22-2994657.05	5UG-LH5058	5UG-LH	2011	2012	2013	2014	5058	5058	SP	CB	Alive	Alive	Alive	Alive				0	0	0	0	2	4	3	4	2	-1	1	0.477121	0.69897	0.60206	0.69897	0.221849	-0.09691	0.09691	1	1	1	1	10	3	15	17	56	54	50	54	0
722341.70-2994660.78	5UG-LH5059	5UG-LH	2011	2012	2013		5059	5059	SP	CB	Alive	Alive	Dead					0	0	1		78	73			-5			1.89763	1.86923			-0.0283954			2	2			19	13			29	35			0	0
722336.22-2994649.90	5UG-LH5060	5UG-LH	2011	2012	2013		5060	5060	SP	CB	Alive	Alive	Dead					0	0	1		4	1			-3			0.69897	0.30103			-0.39794			1	1			20	2			53	30			0	0
722335.61-2994654.28	5UG-LH5061	5UG-LH	2011	2012	2013		5061	5061	SP	CB	Alive	Alive	Dead					0	0	1		7	6			-1			0.90309	0.845098			-0.0579919			1	1			2	7			34	5			0	0
722337.13-2994654.92	5UG-LH5062	5UG-LH	2011	2012	2013	2014	5062	5062	SP	CB	Alive	Alive	Alive	Alive				0	0	0	0	2	3	0	3	1		3	0.477121	0.60206	0	0.60206	0.124939		0.60206	1	1	1	1	8	25	43	58	28	30	31	39	0	0
722335.05-2994654.50	5UG-LH5063	5UG-LH	2011	2012	2013	2014	5063	5063	SP	CB	Alive	Alive	Alive	Alive				0	0	0	0	48	40	44	45	-8	4	1	1.6902	1.61278	1.65321	1.66276	-0.0774122	0.0404287	0.00954532	2	2	2	2	37	40	60	51	53	53	62	58	22	5
722336.78-2994655.41	5UG-LH5064	5UG-LH	2011	2012	2013	2014	5064	5064	SP	CB	Alive	Alive	Alive	Alive				0	0	0	0	23	23	27	25	0	4	-2	1.38021	1.38021	1.44716	1.41497	0	0.0669468	-0.0321847	2	2	2	2	33	29	48	54	47	50	53	55	0	0
722341.00-2994660.29	5UG-LH5066	5UG-LH	2011	2012	2013	2014	5066	5066	SP	CB	Alive	Alive	Alive	Alive				0	0	0	0	14	12	18	18	-2	6	0	1.17609	1.11394	1.27875	1.27875	-0.0621479	0.16481	0	2	2	2	2	30	33	60	58	51	44	53	45	2	0
722336.52-2994667.83	5UG-LH5069	5UG-LH	2011	2012	2013	2014	5069	5069	SP	CB	Alive	Alive	Alive	Alive				0	0	0	0	123	122	127	127	-1	5	0	2.09342	2.08991	2.10721	2.10721	-0.00351657	0.0173049	0	3	3	3	3	25	15	46	40	47	58	65	67	1	0
722333.34-2994671.17	5UG-LH5070	5UG-LH	2011	2012	2013	2014	5070	5070	SP	CB	Alive	Alive	Alive	Alive				0	0	0	0	28	20	21	20	-8	1	-1	1.4624	1.32222	1.34242	1.32222	-0.140179	0.0202034	-0.0202034	2	2	2	2	27	32	44	46	39	50	59	55	0	0
722334.20-2994672.01	5UG-LH5071	5UG-LH	2011	2012	2013	2014	5071	5071	SP	CB	Alive	Alive	Alive	Alive				0	0	0	0	27	21	26	25	-6	5	-1	1.44716	1.34242	1.43136	1.41497	-0.104735	0.0889411	-0.0163904	2	2	2	2	25	27	30	49	48	52	46	55	0	0
722328.84-2994664.52	5UG-LH5072	5UG-LH	2011	2012	2013	2014	5072	5072	SP	CB	Alive	Alive	Alive	Alive				0	0	0	0	20	15	20	26	-5	5	6	1.32222	1.20412	1.32222	1.43136	-0.118099	0.118099	0.109144	2	2	2	2	20	14	63	60	47	49	55	55	0	0
722326.16-2994667.96	5UG-LH5073	5UG-LH	2011	2012	2013	2014	5073	5073	SP	CB	Alive	Alive	Alive	Alive				0	0	0	0	12	12	18	19	0	6	1	1.11394	1.11394	1.27875	1.30103	0	0.16481	0.0222764	2	2	2	2	22	26	58	51	38	40	50	50	0	0
722322.74-2994671.19	5UG-LH5074	5UG-LH	2011	2012	2013	2014	5074	5074	SP	CB	Alive	Alive	Alive	Alive				0	0	0	0	15	15	21	23	0	6	2	1.20412	1.20412	1.34242	1.38021	0	0.138303	0.0377886	2	2	2	2	18	36	61	76	32	40	44	39	0	0
722321.14-2994673.51	5UG-LH5075	5UG-LH	2011	2012	2013	2014	5075	5075	SP	CB	Alive	Alive	Alive	Alive				0	0	0	0	20	17	24	28	-3	7	4	1.32222	1.25527	1.39794	1.4624	-0.0669468	0.142668	0.064458	2	2	2	2	25	42	75	77	47	45	53	52	0	0
722331.74-2994658.84	5UG-LH5076	5UG-LH	2011	2012	2013	2014	5076	5076	SP	CB	Alive	Alive	Alive	Alive				0	0	0	0	85	77	77	84	-8	0	7	1.9345	1.89209	1.89209	1.92942	-0.0424038	0	0.0373243	2	2	2	2	40	42	56	48	54	58	68	65	2	5
722330.76-2994657.83	5UG-LH5077	5UG-LH	2011	2012	2013	2014	5077	5077	SP	CB	Alive	Alive	Alive	Alive				0	0	0	0	15	12	16	13	-3	4	-3	1.20412	1.11394	1.23045	1.14613	-0.0901766	0.116506	-0.0843209	2	2	2	2	22	24	49	54	47	45	53	43	0	0
722330.30-2994656.56	5UG-LH5078	5UG-LH	2011	2012	2013	2014	5078	5078	SP	CB	Alive	Alive	Alive	Alive				0	0	0	0	16	14	15	16	-2	1	1	1.23045	1.17609	1.20412	1.23045	-0.0543577	0.0280287	0.0263289	2	2	2	2	24	42	65	70	48	49	52	50	0
722299.04-2994652.67	6UG-UH5080	6UG-UH	2011	2012	2013	2014	5080	5080	SP	SC	Alive	Alive	Alive	Alive				0	0	0	0	44	40	46	40	-4	6	-6	1.65321	1.61278	1.6721	1.61278	-0.0404287	0.059314	-0.059314	2	2	2	2	42	56	72	70	89	50	62	60	0	0
722299.09-2994654.06	6UG-UH5081	6UG-UH	2011	2012	2013	2014	5081	5081	SP	SC	Alive	Alive	Alive	Alive				0	0	0	0	37	36	42	37	-1	6	-5	1.57978	1.5682	1.63347	1.57978	-0.0115819	0.0652667	-0.0536849	2	2	2	2	36	63	66	70	35	38	46	36	0	0
722299.57-2994654.51	6UG-UH5082	6UG-UH	2011	2012	2013	2014	5082	5082	SP	SC	Alive	Alive	Alive	Alive				0	0	0	0	100	91	98	100	-9	7	2	2.00432	1.96379	1.99564	2.00432	-0.0405335	0.0318474	0.00868618	3	2	2	3	43	37	49	55	53	48	50	50	0	0
722303.41-2994655.03	6UG-UH5084	6UG-UH	2011	2012	2013	2014	5084	5084	SP	SC	Alive	Alive	Alive	Alive				0	0	0	0	330	332	336	350	2	4	14	2.51983	2.52244	2.52763	2.54531	0.00261624	0.00518567	0.0176772	4	4	4	4	70	50	10	54	65	66	65	51	0	0
722302.46-2994654.34	6UG-UH5085	6UG-UH	2011	2012	2013	2014	5085	5085	SP	SC	Alive	Alive	Alive	Alive				0	0	0	0	272	263	270	276	-9	7	6	2.43616	2.4216	2.43297	2.44248	-0.0145587	0.0113654	0.00951048	4	4	4	4	56	50	46	66	66	56	84	60	0	0
722301.52-2994654.25	6UG-UH5086	6UG-UH	2011	2012	2013	2014	5086	5086	SP	SC	Alive	Alive	Alive	Alive				0	0	0	0	77	73	86	81	-4	13	-5	1.89209	1.86923	1.93952	1.91381	-0.0228629	0.0702875	-0.0257054	2	2	2	2	30	31	44	86	44	46	51	50	0	0
722304.00-2994650.10	6UG-UH5087	6UG-UH	2011	2012	2013	2014	5087	5087	SP	SC	Alive	Alive	Alive	Alive				0	0	0	0	188	180	184	180	-8	4	-4	2.27646	2.25768	2.26717	2.25768	-0.0187832	0.00949315	-0.00949315	3	3	3	3	41	44	47	60	47	48	56	50	0	0
722272.46-2994637.64	6UG-UH5088	6UG-UH	2011	2012	2013	2014	5088	5088	SP	SC	Alive	Alive	Alive	Alive				0	0	0	0	58	83	87	85	25	4	-2	1.77085	1.92428	1.94448	1.9345	0.153427	0.0202034	-0.00998422	2	2	2	2	29	41	67	60	50	49	58	62	0	0
722276.01-2994623.29	6UG-UH5090	6UG-UH	2011	2012	2013	2014	5090	5090	SP	SC	Alive	Alive	Alive	Alive				0	0	0	0			599	610			11			2.77815	2.78604			0.00788996			4	4	56	75		60	65	60		70	0	0
722262.69-2994667.26	6UG-UH5091	6UG-UH	2011	2012	2013	2014	5091	5091	SP	SC	Alive	Alive	Alive	Alive				0	0	0	0	350	350	355	358	0	5	3	2.54531	2.54531	2.55145	2.55509	0	0.00614288	0.00364445	4	4	4	4	62	24	80	52	85	70	70	62	0	0
722256.80-2994662.44	6UG-UH5092	6UG-UH		2012	2013	2014	5092	5092	SP	SC		Alive	Alive	Dead	1				0	0	1		1	3			2			0.30103	0.60206			0.30103			1	1			1	6			6	32			0
722257.94-2994662.80	6UG-UH5093	6UG-UH		2012	2013	2014	5093	5093	SP	SC		Alive	Alive	Alive	1				0	0	0		1	3	3		2	0		0.30103	0.60206	0.60206		0.30103	0		1	1	1		1	6	8		5	29	18		0
722258.39-2994662.17	6UG-UH5094	6UG-UH		2012	2013	2014	5094	5094	SP	SC		Alive	Alive	NSE	1				0	0			1	4			3			0.30103	0.69897			0.39794			1	1			1	6			12	36			0
722258.16-2994661.70	6UG-UH5095	6UG-UH	2011	2012	2013	2014	5095	5095	SP	SC	Alive	Alive	Alive	Alive				0	0	0	0	180	176	184	193	-4	8	9	2.25768	2.24797	2.26717	2.2878	-0.00970531	0.0191985	0.02063	3	3	3	3	35	29	70	45	60	54	55	59	0	0
722262.58-2994655.74	6UG-UH5096	6UG-UH	2011	2012	2013	2014	5096	5096	SP	SC	Alive	Alive	Alive	Alive				0	0	0	0	200	210	216	214	10	6	-2	2.3032	2.32428	2.33646	2.33244	0.0210864	0.0121773	-0.00402127	3	3	3	3	40	37	62	60	55	56	53	50	0	0
722262.05-2994655.87	6UG-UH5097	6UG-UH	2011	2012	2013	2014	5097	5097	SP	SC	Alive	Alive	Alive	Alive				0	0	0	0	126	126	135	130	0	9	-5	2.1038	2.1038	2.13354	2.11727	0	0.0297352	-0.0162676	3	3	3	3	36	36	58	50	57	60	58	66	0	0
722259.70-2994654.48	6UG-UH5098	6UG-UH	2011	2012	2013	2014	5098	5098	SP	SC	Alive	Alive	Alive	Alive				0	0	0	0	284	278	284	302	-6	6	18	2.45484	2.4456	2.45484	2.48144	-0.00924066	0.00924066	0.0265978	4	4	4	4	55	65	56	50	55	60	52	45	0
722262.73-2994655.18	6UG-UH5099	6UG-UH	2011	2012	2013	2014	5099	5099	SP	SC	Alive	Alive	Alive	Alive				0	0	0	0	180	185	191	195	5	6	4	2.25768	2.26951	2.2833	2.29226	0.0118344	0.0137883	0.00895484	3	3	3	3	50	40	69	60	68	75	70	70	0	0
722259.58-2994654.22	6UG-UH5100	6UG-UH	2011	2012	2013	2014	5100	5100	SP	SC	Alive	Alive	Alive	Alive				0	0	0	0	300	293	310	304	-7	17	-6	2.47857	2.46835	2.49276	2.4843	-0.0102192	0.0244131	-0.00846055	4	4	4	4	34	32	68	50	60	70	60	60	0	0
722294.01-2994669.84	6UG-UH5102	6UG-UH	2011	2012	2013	2014	5102	5102	SP	SC	Alive	Alive	Alive	Alive				0	0	0	0	16	22	21	30	6	-1	9	1.23045	1.36173	1.34242	1.49136	0.131279	-0.0193052	0.148939	2	2	2	2	48	61	67	60	49	56	57	55	0	0
722296.64-2994672.58	6UG-UH5104	6UG-UH	2011	2012	2013	2014	5104	5104	SP	SC	Alive	Alive	Alive	Alive				0	0	0	0	26	26	28	30	0	2	2	1.43136	1.43136	1.4624	1.49136	0	0.0310342	0.0289637	2	2	2	2	46	66	99	94	44	50	54	60	0	0
722296.70-2994671.62	6UG-UH5105	6UG-UH	2011	2012	2013	2014	5105	5105	SP	SC	Alive	Alive	Alive	Alive				0	0	0	0	22	31	36	31	9	5	-5	1.36173	1.50515	1.5682	1.50515	0.143422	0.0630517	-0.0630517	2	2	2	2	39	54	72	62	51	58	61	60	0	0
722291.83-2994671.93	6UG-UH5109	6UG-UH	2011	2012	2013	2014	5109	5109	SP	SC	Alive	Alive	Alive	Alive				0	0	0	0	112	120	114	120	8	-6	6	2.05308	2.08279	2.0607	2.08279	0.0297069	-0.0220875	0.0220875	3	3	3	3	26	42	50	52	56	62	67	69	0	0
722292.68-2994671.52	6UG-UH5110	6UG-UH	2011	2012	2013	2014	5110	5110	SP	SC	Alive	Alive	Alive	Alive				0	0	0	0	30	37	42	44	7	5	2	1.49136	1.57978	1.63347	1.65321	0.0884219	0.0536849	0.0197441	2	2	2	2	38	56	48	60	50	56	58	57	0	0
722293.59-2994670.15	6UG-UH5111	6UG-UH	2011	2012	2013	2014	5111	5111	SP	SC	Alive	Alive	Alive	Alive				0	0	0	0	205	206	204	210	1	-2	6	2.31387	2.31597	2.31175	2.32428	0.00210313	-0.00421648	0.0125286	3	3	3	3	37	31	50	40	45	46	60	55	0	0
722293.70-2994668.00	6UG-UH5112	6UG-UH	2011	2012	2013	2014	5112	5112	SP	SC	Alive	Alive	Alive	Alive				0	0	0	0	25	30	32	32	5	2	0	1.41497	1.49136	1.51851	1.51851	0.0763883	0.0271522	0	2	2	2	2	40	60	80	70	51	60	60	62	0	0
722291.93-2994668.32	6UG-UH5113	6UG-UH	2011	2012	2013	2014	5113	5113	SP	SC	Alive	Alive	Alive	Alive				0	0	0	0	213	208	214	220	-5	6	6	2.33041	2.32015	2.33244	2.34439	-0.0102675	0.0122922	0.0119538	3	3	3	3	44	30	50	47	66	60	69	55	0	0
722294.80-2994673.05	6UG-UH5114	6UG-UH	2011	2012	2013	2014	5114	5114	SP	SC	Alive	Alive	Alive	Alive				0	0	0	0	144	150	154	152	6	4	-2	2.16137	2.17898	2.19033	2.18469	0.0176089	0.0113548	-0.00564027	3	3	3	3	37	30	65	35	68	58	57	58	0	0
722286.24-2994674.39	6UG-UH5117	6UG-UH	2011	2012	2013	2014	5117	5117	SP	SC	Alive	Alive	Alive	Alive				0	0	0	0	2	2	2	2	0	0	0	0.477121	0.477121	0.477121	0.477121	0	0	0	1	1	1	1	18	22	18	12	31	39	31	37	0	0
722288.62-2994669.86	6UG-UH5118	6UG-UH	2011	2012	2013	2014	5118	5118	SP	SC	Alive	Alive	Alive	Alive				0	0	0	0	150	170	180	180	20	10	0	2.17898	2.233	2.25768	2.25768	0.0540192	0.0246825	0	3	3	3	3	78	71	63	50	54	75	66	53	0	0
722286.50-2994671.08	6UG-UH5119	6UG-UH	2011	2012	2013	2014	5119	5119	SP	SC	Alive	Alive	Alive	Alive				0	0	0	0	203	207	202	210	4	-5	8	2.30963	2.31806	2.3075	2.32428	0.00843317	-0.0105673	0.0167864	3	3	3	3	62	45	35	35	54	66	70	52	0	0
722289.01-2994667.29	6UG-UH5120	6UG-UH	2011	2012	2013	2014	5120	5120	SP	SC	Alive	Alive	Alive	Alive				0	0	0	0	67	72	76	80	5	4	4	1.83251	1.86332	1.88649	1.90849	0.0308139	0.0231679	0.0219943	2	2	2	2	54	67	80	67	64	68	72	71	0	0
722289.05-2994666.60	6UG-UH5121	6UG-UH	2011	2012	2013	2014	5121	5121	SP	SC	Alive	Alive	Alive	Alive				0	0	0	0	53	60	61	63	7	1	2	1.73239	1.78533	1.79239	1.80618	0.0529361	0.00706185	0.0137883	2	2	2	2	43	67	74	60	46	47	54	52	0	0
722288.29-2994668.67	6UG-UH5122	6UG-UH	2011	2012	2013	2014	5122	5122	SP	SC	Alive	Alive	Alive	Alive				0	0	0	0	260	260	273	280	0	13	7	2.41664	2.41664	2.43775	2.44871	0	0.0211101	0.0109558	4	4	4	4	77	52	81	116	66	67	92	70	0	0
722289.95-2994666.84	6UG-UH5123	6UG-UH	2011	2012	2013	2014	5123	5123	SP	SC	Alive	Alive	Alive	Alive				0	0	0	0	22	30	31	30	8	1	-1	1.36173	1.49136	1.50515	1.49136	0.129634	0.0137883	-0.0137883	2	2	2	2	49	62	80	70	56	60	72	70	0	0
722283.69-2994661.61	6UG-UH5124	6UG-UH	2011	2012	2013	2014	5124	5124	SP	SC	Alive	Alive	Alive	Alive				0	0	0	0	242	248	242	244	6	-6	2	2.38561	2.3962	2.38561	2.38917	0.0105931	-0.0105931	0.00355981	3	3	3	3	50	40	83	60	65	70	72	60	0	0
722279.20-2994662.65	6UG-UH5125	6UG-UH	2011	2012	2013	2014	5125	5125	SP	SC	Alive	Alive	Alive	Alive				0	0	0	0	270	268	270	280	-2	2	10	2.43297	2.42975	2.43297	2.44871	-0.00321701	0.00321701	0.015737	4	4	4	4	40	33	60	60	56	52	54	66	0	0
722273.32-2994658.85	6UG-UH5126	6UG-UH	2011	2012	2013	2014	5126	5126	SP	SC	Alive	Alive	Alive	Alive				0	0	0	0	232	259	257	262	27	-2	5	2.36736	2.41497	2.41162	2.41996	0.0476174	-0.00335364	0.00833604	3	4	4	4	30	40	68	47	65	60	64	66	0	0
722271.10-2994658.78	6UG-UH5127	6UG-UH	2011	2012	2013	2014	5127	5127	SP	SC	Alive	Alive	Alive	Alive				0	0	0	0	110	118	124	124	8	6	0	2.04532	2.07555	2.09691	2.09691	0.030224	0.0213631	0	3	3	3	3	44	45	54	49	54	52	54	51	0	0
722272.11-2994660.56	6UG-UH5128	6UG-UH	2011	2012	2013	2014	5128	5128	SP	SC	Alive	Alive	Alive	Alive				0	0	0	0	221	215	206	210	-6	-9	4	2.34635	2.33445	2.31597	2.32428	-0.0118992	-0.0184834	0.00831211	3	3	3	3	53	50	74	48	43	65	54	63	0	0
722272.42-2994661.30	6UG-UH5129	6UG-UH		2012	2013	2014	5129	5129	SP	SC		Alive	Unknown	NSE	1				0	1			1							0.30103							1				1				25
722275.79-2994661.29	6UG-UH5132	6UG-UH	2011	2012	2013	2014	5132	5132	SP	SC	Alive	Alive	Alive	Alive				0	0	0	0	191	192	203	212	1	11	9	2.2833	2.28556	2.30963	2.32838	0.00225608	0.0240729	0.0187494	3	3	3	3	34	43	55	46	60	66	61	64	0	0
722268.20-2994662.72	6UG-UH5135	6UG-UH	2011	2012	2013	2014	5135	5135	SP	SC	Alive	Alive	Alive	Alive				0	0	0	0	1	4	2	5	3	-2	3	0.30103	0.69897	0.477121	0.778151	0.39794	-0.221849	0.30103	1	1	1	1	15	21	36	40	42	59	63	64	0	0
722268.04-2994662.17	6UG-UH5136	6UG-UH	2011	2012	2013	2014	5136	5136	SP	SC	Alive	Alive	Alive	Dead				0	0	0	1	1		2					0.30103		0.477121					1		1		5	14	13		40	68	60		0	0
722267.46-2994662.82	6UG-UH5137	6UG-UH		2012	2013	2014	5137	5137	SP	SC		Alive	Alive	NSE	1				0	0			0	1			1			0	0.30103			0.30103			1	1			2	1			25	26			0
722268.58-2994663.06	6UG-UH5138	6UG-UH	2011	2012	2013	2014	5138	5138	SP	SC	Alive	Alive	Unknown	NSE				0	0	1		1	2			1			0.30103	0.477121			0.176091			1	1			19	22			47	50			0
722277.31-2994651.00	6UG-UH5141	6UG-UH	2011	2012	2013	2014	5141	5141	SP	SC	Alive	Alive	Alive	Alive				0	0	0	0	180	176	173	175	-4	-3	2	2.25768	2.24797	2.24055	2.24551	-0.00970531	-0.00742402	0.00496342	3	3	3	3	40	37	55	60	67	60	64	60	0	0
722271.85-2994649.48	6UG-UH5144	6UG-UH	2011	2012	2013	2014	5144	5144	SP	SC	Alive	Alive	Alive	Alive				0	0	0	0	25	36	26	25	11	-10	-1	1.41497	1.5682	1.43136	1.41497	0.153228	-0.136838	-0.0163904	2	2	2	2	22	56	47	44	53	49	50	60	0	0
722273.49-2994647.06	6UG-UH5145	6UG-UH	2011	2012	2013	2014	5145	5145	SP	SC	Alive	Alive	Alive	Alive				0	0	0	0	20	17	19	22	-3	2	3	1.32222	1.25527	1.30103	1.36173	-0.0669468	0.0457575	0.0606978	2	2	2	2	17	46	58	50	44	47	50	46	0	0
722275.87-2994648.31	6UG-UH5146	6UG-UH	2011	2012	2013	2014	5146	5146	SP	SC	Alive	Alive	Alive	Alive				0	0	0	0	200	208	206	213	8	-2	7	2.3032	2.32015	2.31597	2.33041	0.0169502	-0.00417594	0.0144434	3	3	3	3	39	37	40	50	50	46	48	55	0	0
722274.31-2994644.93	6UG-UH5147	6UG-UH	2011	2012	2013	2014	5147	5147	SP	SC	Alive	Alive	Alive	Alive				0	0	0	0	13	12	14	15	-1	2	1	1.14613	1.11394	1.17609	1.20412	-0.0321847	0.0621479	0.0280287	2	2	2	2	13	25	30	47	42	47	57	53	0	0
722273.94-2994644.63	6UG-UH5148	6UG-UH	2011	2012	2013	2014	5148	5148	SP	SC	Alive	Alive	Alive	Alive				0	0	0	0	9	18	18	20	9	0	2	1	1.27875	1.27875	1.32222	0.278754	0	0.0434657	2	2	2	2	13	30	36	53	34	53	45	56	0
722276.07-2994640.84	6UG-UH5149	6UG-UH	2011	2012	2013	2014	5149	5149	SP	SC	Alive	Alive	Alive	Alive				0	0	0	0	37	34	32	35	-3	-2	3	1.57978	1.54407	1.51851	1.5563	-0.0357156	-0.0255541	0.0377886	2	2	2	2	32	37	39	74	42	46	55	52	0
722278.06-2994643.77	6UG-UH5150	6UG-UH	2011	2012	2013	2014	5150	5150	SP	SC	Alive	Alive	Alive	Alive				0	0	0	0	180	175	170	175	-5	-5	5	2.25768	2.24551	2.233	2.24551	-0.0121659	-0.0125166	0.0125166	3	3	3	3	54	63	65	85	59	65	62	65	0	0
722279.39-2994646.04	6UG-UH5151	6UG-UH	2011	2012	2013	2014	5151	5151	SP	SC	Alive	Alive	Alive	Alive				0	0	0	0	405	421	413	420	16	-8	7	2.60853	2.62531	2.617	2.62428	0.0167864	-0.00831211	0.00728175	4	4	4	4	100	92	90	80	60	60	60	70	0	0
722279.69-2994645.65	6UG-UH5152	6UG-UH	2011	2012	2013	2014	5152	5152	SP	SC	Alive	Alive	Alive	Alive				0	0	0	0	53	53	45	60	0	-8	15	1.73239	1.73239	1.66276	1.78533	0	-0.0696359	0.122572	2	2	2	2	39	48	53	60	60	55	60	63	0
722277.43-2994648.39	6UG-UH5153	6UG-UH	2011	2012	2013	2014	5153	5153	SP	SC	Alive	Alive	Alive	Alive				0	0	0	0	30	30	21	30	0	-9	9	1.49136	1.49136	1.34242	1.49136	0	-0.148939	0.148939	2	2	2	2	17	21	29	25	40	40	35	43	0	0
722276.67-2994649.13	6UG-UH5154	6UG-UH	2011	2012	2013	2014	5154	5154	SP	SC	Alive	Alive	Alive	Alive				0	0	0	0	168	169	170	172	1	1	2	2.22789	2.23045	2.233	2.23805	0.00256222	0.00254719	0.00504999	3	3	3	3	30	30	50	50	60	57	60	63	0	0
722280.15-2994649.45	6UG-UH5155	6UG-UH	2011	2012	2013	2014	5155	5155	SP	SC	Alive	Alive	Alive	Alive				0	0	0	0	15	15	16	15	0	1	-1	1.20412	1.20412	1.23045	1.20412	0	0.0263289	-0.0263289	2	2	2	2	23	39	36	30	38	46	40	42	0	0
722280.23-2994649.37	6UG-UH5156	6UG-UH	2011	2012	2013	2014	5156	5156	SP	SC	Alive	Alive	Alive	Alive				0	0	0	0		20	21	20		1	-1		1.32222	1.34242	1.32222		0.0202034	-0.0202034		2	2	2	53	56	76	60	44	47	51	50	0	0
722284.58-2994648.56	6UG-UH5157	6UG-UH	2011	2012	2013	2014	5157	5157	SP	SC	Alive	Alive	Alive	Alive				0	0	0	0	40	37	40	40	-3	3	0	1.61278	1.57978	1.61278	1.61278	-0.0330003	0.0330003	0	2	2	2	2	34	59	41	60	49	49	50	52	0	0
722283.73-2994651.18	6UG-UH5158	6UG-UH	2011	2012	2013	2014	5158	5158	SP	SC	Alive	Alive	Alive	Alive				0	0	0	0	26	16	26	30	-10	10	4	1.43136	1.23045	1.43136	1.49136	-0.200915	0.200915	0.0599979	2	2	2	2	41	63	77	83	47	43	50	48	0	0
722283.08-2994650.72	6UG-UH5159	6UG-UH	2011	2012	2013	2014	5159	5159	SP	SC	Alive	Alive	Alive	Alive				0	0	0	0	29	31	28	31	2	-3	3	1.47712	1.50515	1.4624	1.50515	0.0280287	-0.042752	0.042752	2	2	2	2	31	50	55	70	48	45	46	50	0	0
722287.03-2994647.97	6UG-UH5160	6UG-UH	2011	2012	2013	2014	5160	5160	SP	SC	Alive	Alive	Alive	Alive				0	0	0	0	29	24	29	30	-5	5	1	1.47712	1.39794	1.47712	1.49136	-0.0791812	0.0791812	0.0142404	2	2	2	2	45	28	46	50	52	48	52	54	0	0
722553.31-2995057.59	3G-LH5181	3G-LH	2011	2012	2013	2014	5181	5181	CP	CB	Alive	Alive	Alive	Dead				0	0	0	1	23	23	16		0	-7		1.38021	1.38021	1.23045		0	-0.149762		2	2	2		26	33	12		50	39	25		0	0
722557.88-2995059.73	3G-LH5182	3G-LH	2011	2012	2013	2014	5182	5182	CP	CB	Alive	Alive	Alive	Alive				0	0	0	0	25	26	24	25	1	-2	1	1.41497	1.43136	1.39794	1.41497	0.0163904	-0.0334238	0.0170333	2	2	2	2	49	54	47	25	47	47	52	47	1	2
722558.93-2995059.74	3G-LH5183	3G-LH	2011	2012	2013	2014	5183	5183	CP	CB	Alive	Alive	Alive	Alive				0	0	0	0	40	42	43	42	2	1	-1	1.61278	1.63347	1.64345	1.63347	0.0206846	0.00998422	-0.00998422	2	2	2	2	36	50	46	17	56	39	44	48	1	1
722559.50-2995060.06	3G-LH5184	3G-LH	2011	2012	2013	2014	5184	5184	CP	CB	Alive	Alive	Alive	Alive				0	0	0	0	3	13	13	10	10	0	-3	0.60206	1.14613	1.14613	1.04139	0.544068	0	-0.104735	1	2	2	2	30	32	26	17	27	38	24	40	0	0
722557.57-2995057.26	3G-LH5185	3G-LH	2011	2012	2013		5185	5185	CP	CB	Alive	Alive	Alive					0	0	0		20	20	19		0	-1		1.32222	1.32222	1.30103		0	-0.0211893		2	2	2		55	38	46		47	23	45		0	0
722554.42-2995049.32	3G-LH5186	3G-LH	2011	2012	2013	2014	5186	5186	CP	CB	Alive	Alive	Unknown	NSE				0	0	1		15	9			-6			1.20412	1			-0.20412			2	1			10	9			30	20			0	0
722550.05-2995042.31	3G-LH5187	3G-LH	2011	2012	2013	2014	5187	5187	CP	CB	Alive	Alive	Alive	Alive				0	0	0	0	3	6	4	6	3	-2	2	0.60206	0.845098	0.69897	0.845098	0.243038	-0.146128	0.146128	1	1	1	1	59	58	62	41	65	57	63	57	0	0
722572.72-2995048.17	3G-LH6001	3G-LH	2011	2012	2013	2014	6001	6001	CP	CB	Alive	Alive	Alive	Alive				0	0	0	0	41	42	36	37	1	-6	1	1.62325	1.63347	1.5682	1.57978	0.0102192	-0.0652667	0.0115819	2	2	2	2	58	23	35	40	54	49	56	50	0	2
722570.20-2995050.38	3G-LH6002	3G-LH	2011	2012	2013	2014	6002	6002	CP	CB	Alive	Alive	Alive	Alive				0	0	0	0	39	30	30	35	-9	0	5	1.60206	1.49136	1.49136	1.5563	-0.110698	0	0.0649408	2	2	2	2	55	14	67	36	51	52	50	46	2	2
722570.08-2995051.52	3G-LH6003	3G-LH	2011	2012	2013	2014	6003	6003	CP	CB	Alive	Alive	Alive	Alive				0	0	0	0	28	34	37	40	6	3	3	1.4624	1.54407	1.57978	1.61278	0.08167	0.0357156	0.0330003	2	2	2	2	52	31	46	40	47	49	46	45	2	2
722567.41-2995049.42	3G-LH6004	3G-LH	2011	2012	2013	2014	6004	6004	CP	CB	Alive	Alive	Alive	Alive				0	0	0	0	70	75	70	75	5	-5	5	1.85126	1.88081	1.85126	1.88081	0.0295552	-0.0295552	0.0295552	2	2	2	2	31	27	49	34	55	58	60	60	3	4
722565.92-2995049.71	3G-LH6006	3G-LH	2011	2012	2013	2014	6006	6006	CP	CB	Alive	Alive	Alive	Alive				0	0	0	0	72	71	75	76	-1	4	1	1.86332	1.85733	1.88081	1.88649	-0.00599036	0.0234811	0.00567713	2	2	2	2	46	23	57	30	53	56	50	50	4	4
722566.22-2995047.22	3G-LH6007	3G-LH	2011	2012	2013	2014	6007	6007	CP	CB	Alive	Alive	Alive	Alive				0	0	0	0	24	27	23	25	3	-4	2	1.39794	1.44716	1.38021	1.41497	0.049218	-0.0669468	0.0347621	2	2	2	2	36	24	31	39	43	50	48	46	2	3
722564.67-2995051.18	3G-LH6008	3G-LH	2011	2012	2013	2014	6008	6008	CP	CB	Alive	Alive	Alive	Alive				0	0	0	0	40	36	39	40	-4	3	1	1.61278	1.5682	1.60206	1.61278	-0.0445821	0.0338583	0.0107239	2	2	2	2	49	33	75	53	52	60	60	58	1	3
722567.80-2995049.68	3G-LH6009	3G-LH	2011	2012	2013	2014	6009	6009	CP	CB	Alive	Alive	Alive	Alive				0	0	0	0	190	192	193	193	2	1	0	2.28103	2.28556	2.2878	2.2878	0.00452394	0.00224442	0	3	3	3	3	54	30	50	37	58	52	55	55	5	10
722568.04-2995050.88	3G-LH6010	3G-LH	2011	2012	2013	2014	6010	6010	CP	CB	Alive	Alive	Alive	Alive				0	0	0	0	162	161	167	167	-1	6	0	2.21219	2.20952	2.22531	2.22531	-0.00267259	0.0157943	0	3	3	3	3	45	28	52	36	52	51	49	52	5	5
722570.75-2995050.93	3G-LH6011	3G-LH	2011	2012	2013	2014	6011	6011	CP	CB	Alive	Alive	Alive	Alive				0	0	0	0	5	5	5	6	0	0	1	0.778151	0.778151	0.778151	0.845098	0	0	0.0669468	1	1	1	1	47	10	40	35	50	60	50	50	0	0
722570.13-2995054.17	3G-LH6012	3G-LH	2011	2012	2013	2014	6012	6012	CP	CB	Alive	Alive	Alive	Alive				0	0	0	0	29	25	32	30	-4	7	-2	1.47712	1.41497	1.51851	1.49136	-0.0621479	0.103541	-0.0271522	2	2	2	2	62	32	53	43	65	65	65	60	7	4
722565.44-2995055.33	3G-LH6013	3G-LH	2011	2012	2013	2014	6013	6013	CP	CB	Alive	Alive	Alive	Alive				0	0	0	0	11	11	13	16	0	2	3	1.07918	1.07918	1.14613	1.23045	0	0.0669468	0.0843209	2	2	2	2	54	32	44	21	45	47	44	37	0	4
722566.22-2995052.20	3G-LH6014	3G-LH	2011	2012	2013	2014	6014	6014	CP	CB	Alive	Alive	Alive	Alive				0	0	0	0	438	444	444	450	6	0	6	2.64246	2.64836	2.64836	2.65418	0.00589549	0	0.00581653	4	4	4	4	95	81	75	68	78	69	74	70	33	22
722565.81-2995048.57	3G-LH6015	3G-LH	2011	2012	2013	2014	6015	6015	CP	CB	Alive	Alive	Alive	Alive				0	0	0	0	33	35	36	40	2	1	4	1.53148	1.5563	1.5682	1.61278	0.0248236	0.0118992	0.0445821	2	2	2	2	49	47	50	37	46	52	45	45	1	1
722563.84-2995049.24	3G-LH6017	3G-LH	2011	2012	2013	2014	6017	6017	CP	CB	Alive	Alive	Alive	Alive				0	0	0	0	129	124	136	140	-5	12	4	2.11394	2.09691	2.13672	2.14922	-0.0170333	0.0398106	0.0124985	3	3	3	3	53	34	51	37	60	55	68	60	7	6
722565.35-2995042.27	3G-LH6018	3G-LH	2011	2012	2013	2014	6018	6018	CP	CB	Alive	Alive	Alive	Alive				0	0	0	0	123	124	125	131	1	1	6	2.09342	2.09691	2.10037	2.12057	0.00348833	0.00346053	0.0202034	3	3	3	3	38	39	52	33	60	60	71	61	9	6
722561.43-2995038.42	3G-LH6019	3G-LH	2011	2012	2013	2014	6019	6019	CP	CB	Alive	Alive	Alive	Alive				0	0	0	0	130	127	140	140	-3	13	0	2.11727	2.10721	2.14922	2.14922	-0.0100613	0.0420091	0	3	3	3	3	46	28	54	33	63	57	61	59	12	10
	6UG-UH5203	6UG-UH				2014	5203		SP	SC				Dead
722285.51-2994668.24	6UG-UH5204	6UG-UH	2011	2012	2013	2014	5204	5204	SP	SC	Alive	Alive	Alive	Alive				0	0	0	0	220	215	215	226	-5	0	11	2.34439	2.33445	2.33445	2.35603	-0.00993852	0	0.0215721	3	3	3	3	43	51	55	73	56	46	84	55	0	0
722285.53-2994665.70	6UG-UH5206	6UG-UH	2011	2012	2013	2014	5206	5206	SP	SC	Alive	Alive	Alive	Alive				0	0	0	0	16	17	23	26	1	6	3	1.23045	1.25527	1.38021	1.43136	0.0248236	0.124939	0.0511525	2	2	2	2	46	55	70	75	56	53	51	62	0	0
722283.96-2994665.11	6UG-UH5208	6UG-UH	2011	2012	2013	2014	5208	5208	SP	SC	Alive	Alive	Alive	Alive				0	0	0	0	14	17	19	15	3	2	-4	1.17609	1.25527	1.30103	1.20412	0.0791812	0.0457575	-0.09691	2	2	2	2	45	60	69	65	44	49	53	49	0	0
722284.31-2994664.83	6UG-UH5209	6UG-UH	2011	2012	2013	2014	5209	5209	SP	SC	Alive	Alive	Alive	Alive				0	0	0	0	15	16	24	25	1	8	1	1.20412	1.23045	1.39794	1.41497	0.0263289	0.167491	0.0170333	2	2	2	2	57	55	87	70	58	60	64	67	0	0
722283.10-2994671.68	6UG-UH5212	6UG-UH	2011	2012	2013	2014	5212	5212	SP	SC	Alive	Alive	Alive	Alive				0	0	0	0	112	114	109	125	2	-5	16	2.05308	2.0607	2.04139	2.10037	0.0076194	-0.0193052	0.0589779	3	3	3	3	51	58	40	38	55	57	60	60	0
722281.63-2994671.12	6UG-UH5213	6UG-UH	2011	2012	2013	2014	5213	5213	SP	SC	Alive	Alive	Alive	Alive				0	0	0	0	122	127	121	140	5	-6	19	2.08991	2.10721	2.08636	2.14922	0.0173049	-0.0208501	0.0628593	3	3	3	3	45	62	66	62	65	63	63	64	0	0
722279.31-2994670.23	6UG-UH5215	6UG-UH	2011	2012	2013	2014	5215	5215	SP	SC	Alive	Alive	Alive	Alive				0	0	0	0	34	34	40	42	0	6	2	1.54407	1.54407	1.61278	1.63347	0	0.0687158	0.0206846	2	2	2	2	49	51	60	79	60	57	67	68	0
722280.03-2994668.04	6UG-UH5216	6UG-UH	2011	2012	2013	2014	5216	5216	SP	SC	Alive	Alive	Alive	Alive				0	0	0	0	111	104	110	120	-7	6	10	2.04922	2.02119	2.04532	2.08279	-0.0280287	0.0241337	0.0374624	3	3	3	3	37	66	66	60	58	60	64	61	0	0
722278.53-2994668.16	6UG-UH5218	6UG-UH	2011	2012	2013	2014	5218	5218	SP	SC	Alive	Alive	Alive	Alive				0	0	0	0	116	118	124	123	2	6	-1	2.06819	2.07555	2.09691	2.09342	0.0073611	0.0213631	-0.00348833	3	3	3	3	46	49	52	54	53	53	52	57	0	0
722282.06-2994667.64	6UG-UH5219	6UG-UH	2011	2012	2013	2014	5219	5219	SP	SC	Alive	Alive	Alive	Alive				0	0	0	0	155	150	160	163	-5	10	3	2.19312	2.17898	2.20683	2.21484	-0.0141477	0.0278489	0.00801797	3	3	3	3	47	63	72	65	62	64	72	76	0	0
722280.08-2994668.02	6UG-UH5220	6UG-UH	2011	2012	2013	2014	5220	5220	SP	SC	Alive	Alive	Alive	Alive				0	0	0	0	42	32	42	45	-10	10	3	1.63347	1.51851	1.63347	1.66276	-0.114955	0.114955	0.0292894	2	2	2	2	39	54	97	70	54	53	62	62	0	0
722275.84-2994669.58	6UG-UH5223	6UG-UH	2011	2012	2013	2014	5223	5223	SP	SC	Alive	Alive	Alive	Alive				0	0	0	0	225	224	221	220	-1	-3	-1	2.35411	2.35218	2.34635	2.34439	-0.00192592	-0.00582954	-0.0019607	3	3	3	3	50	47	52	47	65	53	50	61	0	0
722273.84-2994668.10	6UG-UH5224	6UG-UH	2011	2012	2013	2014	5224	5224	SP	SC	Alive	Alive	Alive	Alive				0	0	0	0	182	180	186	186	-2	6	0	2.26245	2.25768	2.27184	2.27184	-0.00477251	0.014163	0	3	3	3	3	52	57	74	41	62	57	65	64	0
722272.45-2994669.66	6UG-UH5225	6UG-UH	2011	2012	2013	2014	5225	5225	SP	SC	Alive	Alive	Alive	Alive				0	0	0	0	150	140	164	169	-10	24	5	2.17898	2.14922	2.21748	2.23045	-0.0297578	0.0682648	0.012965	3	3	3	3	58	55	82	67	60	59	65	65	0
722270.86-2994669.08	6UG-UH5226	6UG-UH	2011	2012	2013	2014	5226	5226	SP	SC	Alive	Alive	Alive	Alive				0	0	0	0	2	1	4	9	-1	3	5	0.477121	0.30103	0.69897	1	-0.176091	0.39794	0.30103	1	1	1	1	13	24	30	49	29	40	53	52	0	0
722270.38-2994665.00	6UG-UH5227	6UG-UH	2011	2012	2013	2014	5227	5227	SP	SC	Alive	Alive	Alive	Alive				0	0	0	0	272	272	286	286	0	14	0	2.43616	2.43616	2.45788	2.45788	0	0.0217192	0	4	4	4	4	50	44	72	52	71	49	70	68	0	0
722271.35-2994665.49	6UG-UH5228	6UG-UH	2011	2012	2013	2014	5228	5228	SP	SC	Alive	Alive	Unknown	NSE				0	0	1		1	1			0			0.30103	0.30103			0			1	1			13	16			49	35			0	0
722272.23-2994665.95	6UG-UH5229	6UG-UH		2012	2013	2014	5229	5229	SP	SC		Alive	Unknown	NSE	1				0	1			1							0.30103							1				4				40				0
722272.56-2994665.69	6UG-UH5230	6UG-UH		2012	2013	2014	5230	5230	SP	SC		Alive	Unknown	NSE	1				0	1			1							0.30103							1				3				10				0
722272.06-2994665.68	6UG-UH5231	6UG-UH		2012	2013		5231	5231	SP	SC		Alive	Dead		1				0	1			1							0.30103							1				2				13				0
722269.62-2994665.32	6UG-UH5233	6UG-UH	2011	2012	2013	2014	5233	5233	SP	SC	Alive	Alive	Alive	Alive				0	0	0	0	188	184	190	196	-4	6	6	2.27646	2.26717	2.28103	2.29447	-0.00929008	0.0138616	0.0134329	3	3	3	3	38	64	74	47	58	63	64	62	0
722267.79-2994668.58	6UG-UH5234	6UG-UH	2011	2012	2013	2014	5234	5234	SP	SC	Alive	Alive	Alive	Alive				0	0	0	0	156	154	161	168	-2	7	7	2.1959	2.19033	2.20952	2.22789	-0.00556795	0.0191833	0.0183717	3	3	3	3	48	42	90	52	59	61	62	63	0
722265.12-2994667.73	6UG-UH5235	6UG-UH	2011	2012	2013	2014	5235	5235	SP	SC	Alive	Alive	Alive	Alive				0	0	0	0	1	1	1	0	0	0		0.30103	0.30103	0.30103	0	0	0		1	1	1	1	27	26	39	52	40	38	45	50	0	0
722266.75-2994661.05	6UG-UH5240	6UG-UH	2011	2012	2013	2014	5240	5240	SP	SC	Alive	Alive	Alive	Alive				0	0	0	0	222	222	228	228	0	6	0	2.3483	2.3483	2.35984	2.35984	0	0.0115306	0	3	3	3	3	43	23	50	40	65	62	64	57	0	0
	6UG-UH5241	6UG-UH				2014	5241		SP	SC				Alive							0				348							2.54283							4				40				50
722260.29-2994647.36	6UG-UH5242	6UG-UH	2011	2012	2013	2014	5242	5242	SP	SC	Alive	Alive	Alive	Alive				0	0	0	0	220	226	288	280	6		-8	2.34439	2.35603	2.4609	2.44871	0.0116336		-0.0121915	3	3	4	4	50	40	70	60	50	76	58	60	0	0
722260.74-2994651.03	6UG-UH5242	6UG-UH	2011	2012	2013	2014	5242	5242	SP	SC	Alive	Alive	Alive	Alive				0	0	0	0	323	333	346	346	10	13	0	2.51055	2.52375	2.54033	2.54033	0.0132015	0.016583	0	4	4	4	4	50	65	80	60	56	60	53	60	0	0
722260.05-2994652.03	6UG-UH5243	6UG-UH	2011	2012	2013	2014	5243	5243	SP	SC	Alive	Alive	Alive	Alive				0	0	0	0	0	7	13	13	7	6	0	0	0.90309	1.14613	1.14613	0.90309	0.243038	0	2	2	2	2	52	34	63	70	43	47	41	50	0	0
722261.50-2994649.70	6UG-UH5244	6UG-UH	2011	2012	2013	2014	5244	5244	SP	SC	Alive	Alive	Alive	Alive				0	0	0	0	244	248	257	250	4	9	-7	2.38917	2.3962	2.41162	2.39967	0.00703326	0.0154204	-0.011946	3	3	4	4	60	24	86	70	63	63	65	60	0	0
722264.85-2994643.96	6UG-UH5245	6UG-UH	2011	2012	2013	2014	5245	5245	SP	SC	Alive	Alive	Alive	Alive				0	0	0	0	290	285	295	300	-5	10	5	2.46389	2.45637	2.47129	2.47857	-0.00752696	0.0149257	0.00727478	4	4	4	4	52	45	68	90	60	49	61	70	0	0
722267.59-2994644.86	6UG-UH5246	6UG-UH	2011	2012	2013		5246	5246	SP	SC	Alive	Alive	Dead					0	0	1		247	245			-2			2.39445	2.39094			-0.00351657			3	3			50	23			46	53			0	0
722269.01-2994648.56	6UG-UH5247	6UG-UH	2011	2012	2013	2014	5247	5247	SP	SC	Alive	Alive	Alive	Alive				0	0	0	0	15	17	17	20	2	0	3	1.20412	1.25527	1.25527	1.32222	0.0511525	0	0.0669468	2	2	2	2	13	20	18	17	40	40	39	37	0	0
722273.79-2994643.62	6UG-UH5248	6UG-UH	2011	2012	2013	2014	5248	5248	SP	SC	Alive	Alive	Alive	Alive				0	0	0	0	200	200	200	200	0	0	0	2.3032	2.3032	2.3032	2.3032	0	0	0	3	3	3	3	38	65	50	75	52	51	60	45	0
722272.41-2994645.79	6UG-UH5249	6UG-UH	2011	2012	2013	2014	5249	5249	SP	SC	Alive	Alive	Alive	Alive				0	0	0	0		286	290	300		4	10		2.45788	2.46389	2.47857		0.00601109	0.0146735		4	4	4	70	64	47	70	56	45	55	60	0
722272.57-2994641.88	6UG-UH5250	6UG-UH	2011	2012	2013	2014	5250	5250	SP	SC	Alive	Alive	Alive	Alive				0	0	0	0	70	68	73		-2	5		1.85126	1.83885	1.86923		-0.0124093	0.0303826		2	2	2		23	24	63	40	43	52	57	70	0	0
722287.82-2994642.89	6UG-UH5252	6UG-UH	2011	2012	2013	2014	5252	5252	SP	SC	Alive	Alive	Alive	Alive				0	0	0	0	149	150	145	150	1	-5	5	2.17609	2.17898	2.16435	2.17898	0.00288569	-0.0146241	0.0146241	3	3	3	3	23	18	35	32	43	39	44	47	0	0
722287.08-2994643.02	6UG-UH5253	6UG-UH	2011	2012	2013	2014	5253	5253	SP	SC	Alive	Alive	Alive	Alive				0	0	0	0	93	90	90	80	-3	0	-10	1.97313	1.95904	1.95904	1.90849	-0.0140865	0	-0.0505564	2	2	2	2	23	23	43	40	47	45	52	45	0	0
722287.64-2994644.44	6UG-UH5254	6UG-UH	2011	2012	2013	2014	5254	5254	SP	SC	Alive	Alive	Alive	Alive				0	0	0	0	113	120	112	130	7	-8	18	2.0569	2.08279	2.05308	2.11727	0.0258805	-0.0297069	0.0641929	3	3	3	3	34	32	49	72	50	48	52	55	0
722283.78-2994647.41	6UG-UH5255	6UG-UH	2011	2012	2013	2014	5255	5255	SP	SC	Alive	Alive	Alive	Alive				0	0	0	0	10	9	11	10	-1	2	-1	1.04139	1	1.07918	1.04139	-0.0413927	0.0791812	-0.0377886	2	2	2	2	21	40	44	60	57	52	46	50	0	0
722288.13-2994643.50	6UG-UH5256	6UG-UH	2011	2012	2013	2014	5256	5256	SP	SC	Alive	Alive	Alive	Alive				0	0	0	0	18	27	21	30	9	-6	9	1.27875	1.44716	1.34242	1.49136	0.168404	-0.104735	0.148939	2	2	2	2	43	23	72	61	58	45	49	53	0
722283.74-2994644.72	6UG-UH5257	6UG-UH	2011	2012	2013	2014	5257	5257	SP	SC	Alive	Alive	Alive	Alive				0	0	0	0	224	218	220	230	-6	2	10	2.35218	2.34044	2.34439	2.36361	-0.0117384	0.00394816	0.0192197	3	3	3	3	54	34	60	70	55	53	60	50	0	0
722288.78-2994648.74	6UG-UH5259	6UG-UH	2011	2012	2013	2014	5259	5259	SP	SC	Alive	Alive	Alive	Alive				0	0	0	0	23	19	22	20	-4	3	-2	1.38021	1.30103	1.36173	1.32222	-0.0791812	0.0606978	-0.0395085	2	2	2	2	33	53	67	70	50	50	56	63	0	0
722298.58-2994671.55	5UG-LH5260	5UG-LH	2011	2012	2013	2014	5260	5260	SP	CB	Alive	Alive	Alive	Alive				0	0	0	0	132	125	126	134	-7	1	8	2.12385	2.10037	2.1038	2.13033	-0.0234811	0.00343318	0.02653	3	3	3	3	32	30	32	34	51	51	53	58	4	10
722300.75-2994666.62	5UG-LH5261	5UG-LH	2011	2012	2013	2014	5261	5261	SP	CB	Alive	Alive	Alive	Alive				0	0	0	0	183	180	185	192	-3	5	7	2.26482	2.25768	2.26951	2.28556	-0.00713925	0.0118344	0.0160444	3	3	3	3	40	39	42	40	60	60	62	56	7	10
722303.46-2994664.03	5UG-LH5262	5UG-LH	2011	2012	2013	2014	5262	5262	SP	CB	Alive	Alive	Alive	Alive				0	0	0	0	19	19	25	34	0	6	9	1.30103	1.30103	1.41497	1.54407	0	0.113943	0.129095	2	2	2	2	43	52	58	31	56	56	60	57	1	3
722309.17-2994657.81	5UG-LH5265	5UG-LH	2011	2012	2013		5265	5265	SP	CB	Alive	Alive	Dead					0	0	1		2	1			-1			0.477121	0.30103			-0.176091			1	1			8	14			33	51			0	0
722309.56-2994657.99	5UG-LH5266	5UG-LH	2011	2012	2013		5266	5266	SP	CB	Alive	Alive	Dead					0	0	1		5	7			2			0.778151	0.90309			0.124939			1	1			10	11			42	44			0	0
722314.64-2994659.20	5UG-LH5268	5UG-LH	2011	2012	2013	2014	5268	5268	SP	CB	Alive	Alive	Alive	Alive				0	0	0	0	15	20	18	22	5	-2	4	1.20412	1.32222	1.27875	1.36173	0.118099	-0.0434657	0.0829742	2	2	2	2	24	64	60	61	43	45	48	49	0	4
722311.56-2994654.92	5UG-LH5270	5UG-LH	2011	2012	2013	2014	5270	5270	SP	CB	Alive	Alive	Alive	Alive				0	0	0	0	9	9	11	11	0	2	0	1	1	1.07918	1.07918	0	0.0791812	0	1	1	2	2	27	37	72	63	51	49	54	57	0	0
722311.39-2994656.50	5UG-LH5271	5UG-LH	2011	2012	2013	2014	5271	5271	SP	CB	Alive	Alive	Alive	Alive				0	0	0	0	168	172	178	181	4	6	3	2.22789	2.23805	2.25285	2.26007	0.0101594	0.0148069	0.00721836	3	3	3	3	64	47	70	55	59	59	59	52	7	9
722314.69-2994658.26	5UG-LH5272	5UG-LH	2011	2012	2013	2014	5272	5272	SP	CB	Alive	Alive	Alive	Alive				0	0	0	0	8	14	15	16	6	1	1	0.954243	1.17609	1.20412	1.23045	0.221849	0.0280287	0.0263289	1	2	2	2	4	29	54	45	37	40	44	48	0	0
722313.89-2994660.17	5UG-LH5273	5UG-LH	2011	2012	2013		5273	5273	SP	CB	Alive	Alive	Dead					0	0	1		2	2			0			0.477121	0.477121			0			1	1			4	6			22	43			0	0
722314.07-2994657.31	5UG-LH5274	5UG-LH	2011	2012	2013	2014	5274	5274	SP	CB	Alive	Alive	Alive	Alive				0	0	0	0	12	16	11	18	4	-5	7	1.11394	1.23045	1.07918	1.27875	0.116506	-0.151268	0.199572	2	2	2	2	20	38	56	64	38	41	50	51	0	0
722314.50-2994659.18	5UG-LH5275	5UG-LH	2011	2012	2013	2014	5275	5275	SP	CB	Alive	Alive	Alive	Alive				0	0	0	0	82	73	82	84	-9	9	2	1.91908	1.86923	1.91908	1.92942	-0.0498464	0.0498464	0.0103408	2	2	2	2	27	49	73	74	39	40	47	49	1	4
722313.89-2994657.84	5UG-LH5276	5UG-LH	2011	2012	2013	2014	5276	5276	SP	CB	Alive	Alive	Alive	NSE				0	0	0		2	4	5		2	1		0.477121	0.69897	0.778151		0.221849	0.0791812		1	1	1		5	21	4		48	40	62		0	0
722314.58-2994658.58	5UG-LH5277	5UG-LH		2012	2013		5277	5277	SP	CB		Alive	Unknown		1				0				1							0.30103							1				2				21				0
722316.02-2994657.38	5UG-LH5278	5UG-LH		2012	2013		5278	5278	SP	CB		Alive	Dead		1				0	1			0							0							1				4				8				0
722315.72-2994658.30	5UG-LH5279	5UG-LH		2012	2013		5279	5279	SP	CB		Alive	Unknown		1				0				1							0.30103							1				2				34				0
722315.12-2994664.35	5UG-LH5280	5UG-LH	2011	2012	2013	2014	5280	5280	SP	CB	Alive	Alive	Alive	Alive				0	0	0	0	5	4	5	6	-1	1	1	0.778151	0.69897	0.778151	0.845098	-0.0791812	0.0791812	0.0669468	1	1	1	1	1	8	23	22	38	50	50	50	0	0
722311.95-2994669.21	5UG-LH5281	5UG-LH	2011	2012	2013	2014	5281	5281	SP	CB	Alive	Alive	Alive	Alive				0	0	0	0	163	165	164	176	2	-1	12	2.21484	2.22011	2.21748	2.24797	0.00526424	-0.00262414	0.0304893	3	3	3	3	35	24	40	35	67	54	60	52	5	7
722310.64-2994667.72	5UG-LH5282	5UG-LH	2011	2012	2013	2014	5282	5282	SP	CB	Alive	Alive	Alive	Alive				0	0	0	0	138	136	134	142	-2	-2	8	2.14301	2.13672	2.13033	2.15534	-0.00629423	-0.0063868	0.0250023	3	3	3	3	31	14	32	44	50	41	50	51	2	3
722313.94-2994666.64	5UG-LH5283	5UG-LH	2011	2012	2013	2014	5283	5283	SP	CB	Alive	Alive	Alive	Alive				0	0	0	0	193	195	193	194	2	-2	1	2.2878	2.29226	2.2878	2.29003	0.00445434	-0.00445434	0.00223288	3	3	3	3	72	42	38	40	81	52	55	49	6	5
	5UG-LH5284	5UG-LH				2014	5284		SP	CB				Alive							0				154							2.19033							3				47				62
722309.66-2994673.02	5UG-LH5286	5UG-LH	2011	2012	2013	2014	5286	5286	SP	CB	Alive	Alive	Alive	Alive				0	0	0	0	310	310	310	313	0	0	3	2.49276	2.49276	2.49276	2.49693	0	0	0.00416926	4	4	4	4	73	38	55	46	85	72	77	67	15	13
722314.16-2994671.88	5UG-LH5287	5UG-LH	2011	2012	2013	2014	5287	5287	SP	CB	Alive	Alive	Alive	Alive				0	0	0	0	414	421	425	430	7	4	5	2.61805	2.62531	2.62941	2.63448	0.00726435	0.00409715	0.00506767	4	4	4	4	74	59	60	47	70	62	75	57	18	24
722308.53-2994672.82	5UG-LH5289	5UG-LH	2011	2012	2013	2014	5289	5289	SP	CB	Alive	Alive	Alive	Alive				0	0	0	0	9	19	23	27	10	4	4	1	1.30103	1.38021	1.44716	0.30103	0.0791812	0.0669468	2	2	2	2	29	50	66	47	48	47	57	52	1	3
722317.14-2994676.74	5UG-LH5291	5UG-LH	2011	2012	2013	2014	5291	5291	SP	CB	Alive	Alive	Alive	Alive				0	0	0	0	275	278	282	282	3	4	0	2.44091	2.4456	2.45179	2.45179	0.00469512	0.00618223	0	4	4	4	4	42	36	47	42	56	60	60	52	7	4
722317.46-2994676.44	5UG-LH5292	5UG-LH		2012	2013	2014	5292	5292	SP	CB		Alive	Alive	NSE	1				0	0			1	2			1			0.30103	0.477121			0.176091			1	1			1	0			33	13			0
722285.56-2994668.37	6UG-UH5293	6UG-UH	2011	2012	2013		5293	5293	SP	SC	Alive	Alive	Alive					0	0	0		116	117	120		1	3		2.06819	2.07188	2.08279		0.00369615	0.0109034		3	3	3		35	37	36		46	40	50		0	0
722318.62-2994675.23	5UG-LH5293	5UG-LH		2012	2013	2014	5293	5293	SP	CB		Alive	Alive	Alive	1				0	0	0		1	4	5		3	1		0.30103	0.69897	0.778151		0.39794	0.0791812		1	1	1		2	2	5		25	26	33		0
722310.55-2994675.68	5UG-LH5294	5UG-LH	2011	2012	2013	2014	5294	5294	SP	CB	Alive	Alive	Alive	Alive				0	0	0	0	28	32	30	36	4	-2	6	1.4624	1.51851	1.49136	1.5682	0.0561159	-0.0271522	0.07684	2	2	2	2	26	53	65	46	52	54	54	54	3	7
722314.08-2994675.14	5UG-LH5295	5UG-LH	2011	2012	2013	2014	5295	5295	SP	CB	Alive	Alive	Alive	Alive				0	0	0	0	214	214	210	220	0	-4	10	2.33244	2.33244	2.32428	2.34439	0	-0.008156	0.0201098	3	3	3	3	65	40	40	40	52	47	55	57	11	7
722315.42-2994674.26	5UG-LH5296	5UG-LH	2011	2012	2013	2014	5296	5296	SP	CB	Alive	Alive	Alive	Alive				0	0	0	0	43	44	49	52	1	5	3	1.64345	1.65321	1.69897	1.72428	0.00975984	0.0457575	0.0253059	2	2	2	2	32	35	45	38	53	54	56	54	1	2
722320.98-2994674.22	5UG-LH5297	5UG-LH	2011	2012	2013	2014	5297	5297	SP	CB	Alive	Alive	Alive	Alive				0	0	0	0	243	240	242	247	-3	2	5	2.38739	2.38202	2.38561	2.39445	-0.00537278	0.00358923	0.00884541	3	3	3	3	55	30	42	24	58	50	84	58	10	8
722319.33-2994673.07	5UG-LH5298	5UG-LH	2011	2012	2013	2014	5298	5298	SP	CB	Alive	Alive	Alive	Alive				0	0	0	0	36	40	42	46	4	2	4	1.5682	1.61278	1.63347	1.6721	0.0445821	0.0206846	0.0386294	2	2	2	2	40	50	62	44	50	55	57	54	2	6
722347.55-2994654.37	5UG-LH5306	5UG-LH	2011	2012	2013	2014	5306	5306	SP	CB	Alive	Alive	Alive	Alive				0	0	0	0	41	40	45	47	-1	5	2	1.62325	1.61278	1.66276	1.68124	-0.0104654	0.049974	0.0184834	2	2	2	2	45	46	50	76	43	53	59	63	2	0
722346.72-2994659.19	5UG-LH5307	5UG-LH	2011	2012	2013	2014	5307	5307	SP	CB	Alive	Alive	Alive	Alive				0	0	0	0	26	26	24	25	0	-2	1	1.43136	1.43136	1.39794	1.41497	0	-0.0334238	0.0170333	2	2	2	2	19	15	33	46	32	38	43	50	0	0
722348.22-2994655.13	5UG-LH5308	5UG-LH	2011	2012	2013	2014	5308	5308	SP	CB	Alive	Alive	Alive	Alive				0	0	0	0	35	33	30	32	-2	-3	2	1.5563	1.53148	1.49136	1.51851	-0.0248236	-0.0401172	0.0271522	2	2	2	2	32	44	46	46	55	48	56	60	0	0
722358.01-2994656.14	5UG-LH5310	5UG-LH	2011	2012	2013	2014	5310	5310	SP	CB	Alive	Alive	Alive	Alive				0	0	0	0	23	23	20	23	0	-3	3	1.38021	1.38021	1.32222	1.38021	0	-0.0579919	0.0579919	2	2	2	2	25	43	35	56	40	42	44	48	0	0
722361.00-2994658.89	5UG-LH5312	5UG-LH		2012	2013		5312	5312	SP	CB		Alive	Unknown		1				0				0							0							1				9				19				0
722360.96-2994663.09	5UG-LH5313	5UG-LH	2011	2012	2013	2014	5313	5313	SP	CB	Alive	Alive	Alive	Alive				0	0	0	0	360	363	360	360	3	-3	0	2.55751	2.5611	2.55751	2.55751	0.00359418	-0.00359418	0	4	4	4	4	60	60	55	50	58	59	47	60	20	15
722357.23-2994659.45	5UG-LH5314	5UG-LH	2011	2012	2013	2014	5314	5314	SP	CB	Alive	Alive	Alive	Alive				0	0	0	0	63	57	67	68	-6	10	1	1.80618	1.76343	1.83251	1.83885	-0.042752	0.0690809	0.00634018	2	2	2	2	50	42	49	53	48	44	50	50	0
722371.51-2994667.28	5UG-LH5315	5UG-LH	2011	2012	2013	2014	5315	5315	SP	CB	Alive	Alive	Alive	Alive				0	0	0	0	100	102	103	110	2	1	7	2.00432	2.01284	2.01703	2.04532	0.00851585	0.00419611	0.0282896	3	3	3	3	35	52	49	46	69	64	64	65	2	4
722369.18-2994667.75	5UG-LH5316	5UG-LH	2011	2012	2013	2014	5316	5316	SP	CB	Alive	Alive	Alive	Alive				0	0	0	0	16	18	18	20	2	0	2	1.23045	1.27875	1.27875	1.32222	0.0483047	0	0.0434657	2	2	2	2	22	37	50	52	43	44	44	48	0	0
722370.28-2994669.27	5UG-LH5317	5UG-LH	2011	2012	2013	2014	5317	5317	SP	CB	Alive	Alive	Alive	Alive				0	0	0	0	154	155	154	160	1	-1	6	2.19033	2.19312	2.19033	2.20683	0.0027929	-0.0027929	0.0164942	3	3	3	3	49	33	38	18	53	47	51	50	3	5
722368.10-2994668.55	5UG-LH5318	5UG-LH	2011	2012	2013	2014	5318	5318	SP	CB	Alive	Alive	Alive	Alive				0	0	0	0	60	62	72	72	2	10	0	1.78533	1.79934	1.86332	1.86332	0.0140107	0.0639823	0	2	2	2	2	34	35	57	43	45	43	49	45	0	0
722367.96-2994669.86	5UG-LH5319	5UG-LH	2011	2012	2013	2014	5319	5319	SP	CB	Alive	Alive	Alive	Alive				0	0	0	0	44	55	56	55	11	1	-1	1.65321	1.74819	1.75587	1.74819	0.0949755	0.00768683	-0.00768683	2	2	2	2	49	53	59	35	62	50	59	58	1	0
722365.80-2994665.31	5UG-LH5320	5UG-LH	2011	2012	2013	2014	5320	5320	SP	CB	Alive	Alive	Alive	Alive				0	0	0	0	20	20	21	25	0	1	4	1.32222	1.32222	1.34242	1.41497	0	0.0202034	0.0725507	2	2	2	2	26	41	59	36	45	54	53	48	0	0
722365.91-2994668.06	5UG-LH5321	5UG-LH	2011	2012	2013	2014	5321	5321	SP	CB	Alive	Alive	Alive	Alive				0	0	0	0	31	21	35	35	-10	14	0	1.50515	1.34242	1.5563	1.5563	-0.162727	0.21388	0	2	2	2	2	42	66	80	70	45	44	53	50	1	0
722366.32-2994666.47	5UG-LH5322	5UG-LH	2011	2012	2013	2014	5322	5322	SP	CB	Alive	Alive	Alive	Alive				0	0	0	0	34	32	33	32	-2	1	-1	1.54407	1.51851	1.53148	1.51851	-0.0255541	0.012965	-0.012965	2	2	2	2	42	42	40	44	48	43	53	50	1	0
722362.47-2994667.07	5UG-LH5323	5UG-LH	2011	2012	2013	2014	5323	5323	SP	CB	Alive	Alive	Alive	Alive				0	0	0	0	130	130	123	130	0	-7	7	2.11727	2.11727	2.09342	2.11727	0	-0.0238496	0.0238496	3	3	3	3	30	30	38	40	50	47	54	68	4	0
722362.88-2994665.66	5UG-LH5324	5UG-LH	2011	2012	2013	2014	5324	5324	SP	CB	Alive	Alive	Alive	Alive				0	0	0	0	170	170	177	177	0	7	0	2.233	2.233	2.25042	2.25042	0	0.0174239	0	3	3	3	3	57	51	41	40	61	59	65	60	4	7
722362.31-2994663.07	5UG-LH5325	5UG-LH	2011	2012	2013	2014	5325	5325	SP	CB	Alive	Alive	Alive	Alive				0	0	0	0	22	22	28	28	0	6	0	1.36173	1.36173	1.4624	1.4624	0	0.10067	0	2	2	2	2	39	49	70	53	55	49	55	60	1	0
722362.26-2994663.56	5UG-LH5326	5UG-LH	2011	2012	2013	2014	5326	5326	SP	CB	Alive	Alive	Alive	Alive				0	0	0	0	23	23	28	28	0	5	0	1.38021	1.38021	1.4624	1.4624	0	0.0821868	0	2	2	2	2	43	65	58	84	53	48	55	45	0	0
722361.03-2994666.35	5UG-LH5327	5UG-LH	2011	2012	2013	2014	5327	5327	SP	CB	Alive	Alive	Alive	Alive				0	0	0	0	138	136	137	140	-2	1	3	2.14301	2.13672	2.13988	2.14922	-0.00629423	0.00315852	0.00934003	3	3	3	3	28	26	33	46	52	44	50	50	3	0
722356.51-2994662.44	5UG-LH5328	5UG-LH	2011	2012	2013	2014	5328	5328	SP	CB	Alive	Alive	Alive	Alive				0	0	0	0	4	3	7	5	-1	4	-2	0.69897	0.60206	0.90309	0.778151	-0.09691	0.30103	-0.124939	1	1	1	1	42	67	57	59	48	61	65	70	0	0
722352.27-2994662.88	5UG-LH5329	5UG-LH	2011	2012	2013	2014	5329	5329	SP	CB	Alive	Alive	Alive	Alive				0	0	0	0	34	34	33	34	0	-1	1	1.54407	1.54407	1.53148	1.54407	0	-0.0125891	0.0125891	2	2	2	2	37	56	75	54	48	55	55	54	1	0
722349.86-2994662.96	5UG-LH5330	5UG-LH	2011	2012	2013	2014	5330	5330	SP	CB	Alive	Alive	Alive	Alive				0	0	0	0	6	10	11	12	4	1	1	0.845098	1.04139	1.07918	1.11394	0.196295	0.0377886	0.0347621	1	2	2	2	34	65	75	50	33	58	60	45	0	0
722354.67-2994663.97	5UG-LH5331	5UG-LH	2011	2012	2013	2014	5331	5331	SP	CB	Alive	Alive	Alive	Alive				0	0	0	0	3	0	1	3		1	2	0.60206	0	0.30103	0.60206		0.30103	0.30103	1	1	1	1	36	56	10	43	47	39	55	48	0	0
722355.02-2994685.18	5UG-LH5332	5UG-LH	2011	2012	2013	2014	5332	5332	SP	CB	Alive	Alive	Alive	Alive				0	0	0	0	31	30	32	34	-1	2	2	1.50515	1.49136	1.51851	1.54407	-0.0137883	0.0271522	0.0255541	2	2	2	2	35	49	49	50	46	38	39	45	1	0
722356.51-2994684.25	5UG-LH5333	5UG-LH	2011	2012	2013	2014	5333	5333	SP	CB	Alive	Alive	Alive	Alive				0	0	0	0	16	20	16	22	4	-4	6	1.23045	1.32222	1.23045	1.36173	0.0917704	-0.0917704	0.131279	2	2	2	2	40	53	61	50	48	46	50	48	0	0
722356.92-2994686.50	5UG-LH5334	5UG-LH	2011	2012	2013	2014	5334	5334	SP	CB	Alive	Alive	Alive	Alive				0	0	0	0	38	40	40	46	2	0	6	1.59106	1.61278	1.61278	1.6721	0.0217192	0	0.059314	2	2	2	2	26	49	56	46	56	60	64	51	0	3
722357.76-2994685.13	5UG-LH5335	5UG-LH	2011	2012	2013	2014	5335	5335	SP	CB	Alive	Alive	Alive	Alive				0	0	0	0	23	23	22	27	0	-1	5	1.38021	1.38021	1.36173	1.44716	0	-0.0184834	0.0854302	2	2	2	2	35	52	54	54	43	47	56	59	1	0
722360.38-2994683.29	5UG-LH5336	5UG-LH	2011	2012	2013	2014	5336	5336	SP	CB	Alive	Alive	Alive	Alive				0	0	0	0	15	18	17	23	3	-1	6	1.20412	1.27875	1.25527	1.38021	0.0746336	-0.0234811	0.124939	2	2	2	2	28	50	43	50	49	48	60	53	0	0
722359.12-2994684.26	5UG-LH5337	5UG-LH	2011	2012	2013	2014	5337	5337	SP	CB	Alive	Alive	Alive	Alive				0	0	0	0	82	75	83	87	-7	8	4	1.91908	1.88081	1.92428	1.94448	-0.0382645	0.0434657	0.0202034	2	2	2	2	22	25	36	33	54	47	53	54	1
722360.50-2994682.90	5UG-LH5338	5UG-LH	2011	2012	2013	2014	5338	5338	SP	CB	Alive	Alive	Alive	Alive				0	0	0	0	12	17	12	15	5	-5	3	1.11394	1.25527	1.11394	1.20412	0.141329	-0.141329	0.0901766	2	2	2	2	24	60	32	47	61	54	29	54	0	0
722360.11-2994682.11	5UG-LH5339	5UG-LH	2011	2012	2013	2014	5339	5339	SP	CB	Alive	Alive	Alive	Alive				0	0	0	0	19	28	21	24	9	-7	3	1.30103	1.4624	1.34242	1.39794	0.161368	-0.119975	0.0555173	2	2	2	2	19	28	37	30	51	57	54	50	0
722361.74-2994680.92	5UG-LH5340	5UG-LH	2011	2012	2013	2014	5340	5340	SP	CB	Alive	Alive	Alive	Alive				0	0	0	0	55	52	60	55	-3	8	-5	1.74819	1.72428	1.78533	1.74819	-0.0239122	0.061054	-0.0371418	2	2	2	2	27	48	35	40	50	57	62	60	0	0
722362.21-2994681.50	5UG-LH5341	5UG-LH	2011	2012	2013	2014	5341	5341	SP	CB	Alive	Alive	Alive	Alive				0	0	0	0	18	23	24	24	5	1	0	1.27875	1.38021	1.39794	1.39794	0.101458	0.0177288	0	2	2	2	2	35	52	25	54	50	49	52	45	0	0
722361.52-2994680.09	5UG-LH5342	5UG-LH	2011	2012	2013	2014	5342	5342	SP	CB	Alive	Alive	Alive	Alive				0	0	0	0	45	39	49	49	-6	10	0	1.66276	1.60206	1.69897	1.69897	-0.0606978	0.09691	0	2	2	2	2	34	52	36	58	48	55	53	56	1	0
722362.44-2994681.75	5UG-LH5343	5UG-LH	2011	2012	2013	2014	5343	5343	SP	CB	Alive	Alive	Alive	Alive				0	0	0	0	59	60	65	70	1	5	5	1.77815	1.78533	1.81954	1.85126	0.00717858	0.0342141	0.0317144	2	2	2	2	27	33	32	36	49	55	60	58	1	0
722363.00-2994680.37	5UG-LH5344	5UG-LH	2011	2012	2013	2014	5344	5344	SP	CB	Alive	Alive	Alive	Alive				0	0	0	0	42	33	46	45	-9	13	-1	1.63347	1.53148	1.6721	1.66276	-0.10199	0.140619	-0.00934003	2	2	2	2	19	32	12	30	44	32	47	43	0	0
722363.89-2994679.34	5UG-LH5345	5UG-LH	2011	2012	2013	2014	5345	5345	SP	CB	Alive	Alive	Alive	Alive				0	0	0	0	35	40	42	46	5	2	4	1.5563	1.61278	1.63347	1.6721	0.0564814	0.0206846	0.0386294	2	2	2	2	28	42	44	66	44	43	50	47	1	0
722362.21-2994677.15	5UG-LH5346	5UG-LH	2011	2012	2013	2014	5346	5346	SP	CB	Alive	Alive	Alive	Alive				0	0	0	0	27	30	30	33	3	0	3	1.44716	1.49136	1.49136	1.53148	0.0442037	0	0.0401172	2	2	2	2	30	37	53	56	44	38	50	50	1	0
722369.73-2994670.50	5UG-LH5347	5UG-LH	2011	2012	2013	2014	5347	5347	SP	CB	Alive	Alive	Alive	Alive				0	0	0	0	16	20	19	20	4	-1	1	1.23045	1.32222	1.30103	1.32222	0.0917704	-0.0211893	0.0211893	2	2	2	2	27	53	97	69	52	61	58	50	0	0
722366.35-2994673.13	5UG-LH5348	5UG-LH	2011	2012	2013	2014	5348	5348	SP	CB	Alive	Alive	Dead	Dead				0	0	1		16	14			-2			1.23045	1.17609			-0.0543577			2	2			20	15			29	25			0	0
722368.19-2994672.33	5UG-LH5349	5UG-LH	2011	2012	2013	2014	5349	5349	SP	CB	Alive	Alive	Alive	Alive				0	0	0	0	35	36	36	37	1	0	1	1.5563	1.5682	1.5682	1.57978	0.0118992	0	0.0115819	2	2	2	2	33	52	43	47	44	55	47	58	1	7
722359.91-2994669.88	5UG-LH5351	5UG-LH	2011	2012	2013	2014	5351	5351	SP	CB	Alive	Alive	Alive	Alive				0	0	0	0	29	32	33	33	3	1	0	1.47712	1.51851	1.53148	1.53148	0.0413927	0.012965	0	2	2	2	2	19	42	57	60	43	41	49	45	0	0
722358.64-2994674.00	5UG-LH5352	5UG-LH	2011	2012	2013	2014	5352	5352	SP	CB	Alive	Alive	Alive	Alive				0	0	0	0	23	20	20	23	-3	0	3	1.38021	1.32222	1.32222	1.38021	-0.0579919	0	0.0579919	2	2	2	2	47	62	84	85	45	47	52	50	1	0
722360.60-2994674.22	5UG-LH5353	5UG-LH	2011	2012	2013	2014	5353	5353	SP	CB	Alive	Alive	Alive	Alive				0	0	0	0	54	57	58	62	3	1	4	1.74036	1.76343	1.77085	1.79934	0.0230653	0.00742402	0.0284885	2	2	2	2	37	41	73	64	48	51	66	63	1	0
722361.04-2994672.62	5UG-LH5354	5UG-LH	2011	2012	2013	2014	5354	5354	SP	CB	Alive	Alive	Alive	Alive				0	0	0	0	39	37	43	43	-2	6	0	1.60206	1.57978	1.64345	1.64345	-0.0222764	0.0636691	0	2	2	2	2	33	52	43	58	47	45	52	50	0	3
722357.79-2994676.91	5UG-LH5355	5UG-LH	2011	2012	2013	2014	5355	5355	SP	CB	Alive	Alive	Alive	Alive				0	0	0	0	105	104	110	110	-1	6	0	2.02531	2.02119	2.04532	2.04532	-0.00411657	0.0241337	0	3	3	3	3	42	24	55	55	59	56	62	58	1	0
722359.65-2994678.29	5UG-LH5356	5UG-LH	2011	2012	2013	2014	5356	5356	SP	CB	Alive	Alive	Alive	Alive				0	0	0	0	27	27	24	30	0	-3	6	1.44716	1.44716	1.39794	1.49136	0	-0.049218	0.0934217	2	2	2	2	38	42	73	70	42	50	52	47	1	0
722359.35-2994678.93	5UG-LH5357	5UG-LH	2011	2012	2013	2014	5357	5357	SP	CB	Alive	Alive	Alive	Alive				0	0	0	0	91	90	93	94	-1	3	1	1.96379	1.95904	1.97313	1.97772	-0.00474644	0.0140865	0.00459575	2	2	2	2	33	40	55	35	54	46	52	53	2	0
722357.01-2994677.88	5UG-LH5358	5UG-LH	2011	2012	2013	2014	5358	5358	SP	CB	Alive	Alive	Alive	Alive				0	0	0	0	43	40	50	46	-3	10	-4	1.64345	1.61278	1.70757	1.6721	-0.0306688	0.0947863	-0.0354723	2	2	2	2	32	32	47	47	60	48	67	58	2	0
722355.55-2994678.40	5UG-LH5359	5UG-LH	2011	2012	2013	2014	5359	5359	SP	CB	Alive	Alive	Alive	Alive				0	0	0	0	31	26	33	33	-5	7	0	1.50515	1.43136	1.53148	1.53148	-0.0737862	0.100115	0	2	2	2	2	42	53	43	50	48	44	52	50	1	0
722352.78-2994679.62	5UG-LH5360	5UG-LH	2011	2012	2013	2014	5360	5360	SP	CB	Alive	Alive	Alive	Alive				0	0	0	0	24	27	36	33	3	9	-3	1.39794	1.44716	1.5682	1.53148	0.049218	0.121044	-0.0367228	2	2	2	2	46	54	10	90	48	51	50	50	1	5
722352.34-2994680.43	5UG-LH5361	5UG-LH	2011	2012	2013	2014	5361	5361	SP	CB	Alive	Alive	Alive	Alive				0	0	0	0	58	54	61	63	-4	7	2	1.77085	1.74036	1.79239	1.80618	-0.0304893	0.052029	0.0137883	2	2	2	2	26	41	65	63	49	43	55	50	1	0
722359.73-2994680.86	5UG-LH5362	5UG-LH	2011	2012	2013	2014	5362	5362	SP	CB	Alive	Alive	Alive	Alive				0	0	0	0	25	30	30	30	5	0	0	1.41497	1.49136	1.49136	1.49136	0.0763883	0	0	2	2	2	2	52	64	78	60	48	48	58	65	1	0
722356.40-2994680.68	5UG-LH5363	5UG-LH	2011	2012	2013	2014	5363	5363	SP	CB	Alive	Alive	Exclude	Alive				0	0		0	43	45	45	54	2	0	9	1.64345	1.66276	1.66276	1.74036	0.0193052	0	0.0776049	2	2	2	2	18	24	70	46	41	40	51	57	0	0
722356.40-2994680.68	5UG-LH5363	5UG-LH	2011	2012	2013	2014	5363	5363	SP	CB	Alive	Alive	Alive	Alive				0	0	0	0	48	45	51	54	-3	6	3	1.6902	1.66276	1.716	1.74036	-0.0274382	0.0532455	0.0243593	2	2	2	2	18	24	50	46	41	40	50	57	0	0
722358.99-2994677.68	5UG-LH5364	5UG-LH	2011	2012	2013	2014	5364	5364	SP	CB	Alive	Alive	Alive	Alive				0	0	0	0	21	25	26	26	4	1	0	1.34242	1.41497	1.43136	1.43136	0.0725507	0.0163904	0	2	2	2	2	40	60	69	68	50	60	66	64	2	0
722356.50-2994681.78	5UG-LH5365	5UG-LH	2011	2012	2013	2014	5365	5365	SP	CB	Alive	Alive	Alive	Alive				0	0	0	0	38	37	39	45	-1	2	6	1.59106	1.57978	1.60206	1.66276	-0.011281	0.0222764	0.0606978	2	2	2	2	35	47	68	48	49	52	55	56	1	0
722359.45-2994681.66	5UG-LH5366	5UG-LH	2011	2012	2013	2014	5366	5366	SP	CB	Alive	Alive	Alive	Alive				0	0	0	0	25	20	30	30	-5	10	0	1.41497	1.32222	1.49136	1.49136	-0.0927541	0.169142	0	2	2	2	2	35	43	78	80	42	52	56	56	0
722356.61-2994681.60	5UG-LH5367	5UG-LH	2011	2012	2013	2014	5367	5367	SP	CB	Alive	Alive	Alive	Alive				0	0	0	0	10	11	15	22	1	4	7	1.04139	1.07918	1.20412	1.36173	0.0377886	0.124939	0.157608	2	2	2	2	30	45	72	44	50	51	54	54	0	0
722357.60-2994681.10	5UG-LH5368	5UG-LH	2011	2012	2013	2014	5368	5368	SP	CB	Alive	Alive	Alive	Alive				0	0	0	0	31	24	25	31	-7	1	6	1.50515	1.39794	1.41497	1.50515	-0.10721	0.0170333	0.0901766	2	2	2	2	31	45	70	80	41	49	52	47	0	0
722357.00-2994682.29	5UG-LH5369	5UG-LH	2011	2012	2013	2014	5369	5369	SP	CB	Alive	Alive	Alive	Alive				0	0	0	0	9	10	15	20	1	5	5	1	1.04139	1.20412	1.32222	0.0413927	0.162727	0.118099	2	2	2	2	28	46	39	50	40	45	50	53	0	0
722356.38-2994684.68	5UG-LH5370	5UG-LH	2011	2012	2013	2014	5370	5370	SP	CB	Alive	Alive	Alive	Alive				0	0	0	0	42	43	50	53	1	7	3	1.63347	1.64345	1.70757	1.73239	0.00998422	0.0641175	0.0248236	2	2	2	2	32	40	53	50	52	52	60	62	2	6
722356.60-2994684.52	5UG-LH5371	5UG-LH	2011	2012	2013	2014	5371	5371	SP	CB	Alive	Alive	Alive	Alive				0	0	0	0	20	20	25	27	0	5	2	1.32222	1.32222	1.41497	1.44716	0	0.0927541	0.0321847	2	2	2	2	28	38	42	60	50	50	60	55	0	0
722356.32-2994683.09	5UG-LH5372	5UG-LH	2011	2012	2013	2014	5372	5372	SP	CB	Alive	Alive	Alive	Alive				0	0	0	0	43	45	48	50	2	3	2	1.64345	1.66276	1.6902	1.70757	0.0193052	0.0274382	0.0173741	2	2	2	2	35	54	57	45	45	52	58	58	3	0
722356.41-2994684.21	5UG-LH5373	5UG-LH	2011	2012	2013	2014	5373	5373	SP	CB	Alive	Alive	Alive	Alive				0	0	0	0	10	11	13	17	1	2	4	1.04139	1.07918	1.14613	1.25527	0.0377886	0.0669468	0.109144	2	2	2	2	31	44	57	65	42	50	53	52	1
722356.72-2994685.14	5UG-LH5374	5UG-LH	2011	2012	2013	2014	5374	5374	SP	CB	Alive	Alive	Alive	Alive				0	0	0	0	100	100	100	100	0	0	0	2.00432	2.00432	2.00432	2.00432	0	0	0	3	3	3	3	35	41	50	50	53	52	57	60	2
722353.30-2994681.44	5UG-LH5375	5UG-LH	2011	2012	2013	2014	5375	5375	SP	CB	Alive	Alive	Alive	Alive				0	0	0	0	10	8	9	16	-2	1	7	1.04139	0.954243	1	1.23045	-0.0871502	0.0457575	0.230449	2	2	2	2	43	46	47	62	55	52	57	55	1	0
722351.85-2994683.43	5UG-LH5376	5UG-LH	2011	2012	2013	2014	5376	5376	SP	CB	Alive	Alive	Alive	Alive				0	0	0	0	18	20	30	23	2	10	-7	1.27875	1.32222	1.49136	1.38021	0.0434657	0.169142	-0.11115	2	2	2	2	33	40	53	53	43	43	58	70	1	0
722349.71-2994684.64	5UG-LH5377	5UG-LH	2011	2012	2013	2014	5377	5377	SP	CB	Alive	Alive	Alive	Alive				0	0	0	0	53	57	60	60	4	3	0	1.73239	1.76343	1.78533	1.78533	0.0310342	0.0219018	0	2	2	2	2	28	22	40	39	48	49	59	55	3	0
722351.88-2994682.96	5UG-LH5378	5UG-LH	2011	2012	2013	2014	5378	5378	SP	CB	Alive	Alive	Alive	Alive				0	0	0	0	28	30	32	32	2	2	0	1.4624	1.49136	1.51851	1.51851	0.0289637	0.0271522	0	2	2	2	2	38	42	57	49	43	46	52	52	2	0
722349.56-2994682.11	5UG-LH5379	5UG-LH	2011	2012	2013	2014	5379	5379	SP	CB	Alive	Alive	Alive	Alive				0	0	0	0	10	12	10	12	2	-2	2	1.04139	1.11394	1.04139	1.11394	0.0725507	-0.0725507	0.0725507	2	2	2	2	28	26	36	42	42	25	37	40	0	0
722347.97-2994680.32	5UG-LH5380	5UG-LH	2011	2012	2013	2014	5380	5380	SP	CB	Alive	Alive	Alive	Alive				0	0	0	0	25	26	28	32	1	2	4	1.41497	1.43136	1.4624	1.51851	0.0163904	0.0310342	0.0561159	2	2	2	2	47	47	39	48	47	43	48	45	2	0
722348.03-2994679.93	5UG-LH5381	5UG-LH	2011	2012	2013	2014	5381	5381	SP	CB	Alive	Alive	Alive	Alive				0	0	0	0	38	34	32	30	-4	-2	-2	1.59106	1.54407	1.51851	1.49136	-0.0469966	-0.0255541	-0.0271522	2	2	2	2	36	47	52	39	54	51	66	56	2	0
722346.61-2994677.22	5UG-LH5382	5UG-LH	2011	2012	2013	2014	5382	5382	SP	CB	Alive	Alive	Alive	Alive				0	0	0	0	25	22	25	25	-3	3	0	1.41497	1.36173	1.41497	1.41497	-0.0532455	0.0532455	0	2	2	2	2	23	27	4	38	50	42	18	50	0	0
722343.55-2994684.51	5UG-LH5383	5UG-LH	2011	2012	2013	2014	5383	5383	SP	CB	Alive	Alive	Alive	Alive				0	0	0	0	12	15	14	11	3	-1	-3	1.11394	1.20412	1.17609	1.07918	0.0901766	-0.0280287	-0.09691	2	2	2	2	33	54	61	42	47	52	54	50	1	0
722343.70-2994682.72	5UG-LH5384	5UG-LH	2011	2012	2013	2014	5384	5384	SP	CB	Alive	Alive	Alive	Alive				0	0	0	0	35	32	32	32	-3	0	0	1.5563	1.51851	1.51851	1.51851	-0.0377886	0	0	2	2	2	2	26	50	73	57	48	48	56	50	1	0
722335.73-2994679.06	5UG-LH5385	5UG-LH	2011	2012	2013	2014	5385	5385	SP	CB	Alive	Alive	Alive	Alive				0	0	0	0	42	45	48	46	3	3	-2	1.63347	1.66276	1.6902	1.6721	0.0292894	0.0274382	-0.0180982	2	2	2	2	38	39	42	45	52	48	56	50	3	6
722338.79-2994680.63	5UG-LH5387	5UG-LH	2011	2012	2013	2014	5387	5387	SP	CB	Alive	Alive	Alive	Alive				0	0	0	0	30	41	40	40	11	-1	0	1.49136	1.62325	1.61278	1.61278	0.131888	-0.0104654	0	2	2	2	2	23	38	29	46	63	63	70	67	1	0
722343.23-2994679.57	5UG-LH5388	5UG-LH	2011	2012	2013	2014	5388	5388	SP	CB	Alive	Alive	Alive	Alive				0	0	0	0	38	40	41	41	2	1	0	1.59106	1.61278	1.62325	1.62325	0.0217192	0.0104654	0	2	2	2	2	28	36	49	37	43	35	52	50	2	5
722340.83-2994679.53	5UG-LH5389	5UG-LH	2011	2012	2013	2014	5389	5389	SP	CB	Alive	Alive	Alive	Alive				0	0	0	0	26	30	31	32	4	1	1	1.43136	1.49136	1.50515	1.51851	0.0599979	0.0137883	0.013364	2	2	2	2	32	58	85	69	52	55	59	60	1	5
722343.93-2994678.52	5UG-LH5390	5UG-LH	2011	2012	2013	2014	5390	5390	SP	CB	Alive	Alive	Alive	Alive				0	0	0	0	0	0	6	6		6	0	0	0	0.845098	0.845098		0.845098	0	1	1	1	1	37	50	48	65	53	49	44	45	0	0
722341.52-2994675.11	5UG-LH5391	5UG-LH	2011	2012	2013	2014	5391	5391	SP	CB	Alive	Alive	Alive	Alive				0	0	0	0	0	3	6	10	3	3	4	0	0.60206	0.845098	1.04139	0.60206	0.243038	0.196295	1	1	1	2	17	55	69	60	48	57	50	53	0
722342.53-2994681.21	5UG-LH5392	5UG-LH	2011	2012	2013	2014	5392	5392	SP	CB	Alive	Alive	Alive	Alive				0	0	0	0	18	26	20	25	8	-6	5	1.27875	1.43136	1.32222	1.41497	0.15261	-0.109144	0.0927541	2	2	2	2	28	44	67	56	40	44	49	49	1	0
722341.52-2994674.64	5UG-LH5393	5UG-LH	2011	2012	2013	2014	5393	5393	SP	CB	Alive	Alive	Alive	Alive				0	0	0	0	29	22	30	33	-7	8	3	1.47712	1.36173	1.49136	1.53148	-0.115393	0.129634	0.0401172	2	2	2	2	31	47	43	37	52	49	50	53	1	3
722340.63-2994674.81	5UG-LH5394	5UG-LH	2011	2012	2013	2014	5394	5394	SP	CB	Alive	Alive	Alive	Alive				0	0	0	0	8	10	11	15	2	1	4	0.954243	1.04139	1.07918	1.20412	0.0871502	0.0377886	0.124939	1	2	2	2	30	48	45	57	45	46	49	48	0	0
722339.18-2994677.64	5UG-LH5395	5UG-LH	2011	2012	2013	2014	5395	5395	SP	CB	Alive	Alive	Alive	Alive				0	0	0	0	15	15	14	18	0	-1	4	1.20412	1.20412	1.17609	1.27875	0	-0.0280287	0.102662	2	2	2	2	20	42	33	40	61	51	56	59	0	2
722339.82-2994675.50	5UG-LH5396	5UG-LH	2011	2012	2013	2014	5396	5396	SP	CB	Alive	Alive	Alive	Alive				0	0	0	0	35	36	37	32	1	1	-5	1.5563	1.5682	1.57978	1.51851	0.0118992	0.0115819	-0.0612697	2	2	2	2	27	45	35	44	52	47	39	64	0	2
722337.88-2994668.02	5UG-LH5397	5UG-LH	2011	2012	2013	2014	5397	5397	SP	CB	Alive	Alive	Alive	Alive				0	0	0	0	9	12	15	14	3	3	-1	1	1.11394	1.20412	1.17609	0.113943	0.0901766	-0.0280287	1	2	2	2	38	53	69	45	51	51	57	53	0	0
722341.97-2994665.85	5UG-LH5398	5UG-LH	2011	2012	2013	2014	5398	5398	SP	CB	Alive	Alive	Alive	Alive				0	0	0	0	122	123	126	126	1	3	0	2.08991	2.09342	2.1038	2.1038	0.00351657	0.010382	0	3	3	3	3	27	25	34	30	55	43	51	58	1	4
722335.67-2994673.76	5UG-LH5399	5UG-LH	2011	2012	2013	2014	5399	5399	SP	CB	Alive	Alive	Alive	Alive				0	0	0	0	154	157	154	157	3	-3	3	2.19033	2.19866	2.19033	2.19866	0.00832539	-0.00832539	0.00832539	3	3	3	3	35	31	20	30	54	52	55	58	1	5
722317.75-2994673.83	5UG-LH5401	5UG-LH	2011	2012	2013	2014	5401	5401	SP	CB	Alive	Alive	Alive	Alive				0	0	0	0	62	64	63	72	2	-1	9	1.79934	1.81291	1.80618	1.86332	0.0135728	-0.00673338	0.0571429	2	2	2	2	36	32	54	60	47	48	53	57	2	5
722319.38-2994674.74	5UG-LH5403	5UG-LH	2011	2012	2013	2014	5403	5403	SP	CB	Alive	Alive	Alive	Alive				0	0	0	0	10	18	18	24	8	0	6	1.04139	1.27875	1.27875	1.39794	0.237361	0	0.119186	2	2	2	2	45	48	68	52	43	47	49	43	1	5
722321.50-2994673.73	5UG-LH5405	5UG-LH	2011	2012	2013	2014	5405	5405	SP	CB	Alive	Alive	Alive	Alive				0	0	0	0	12	11	13	17	-1	2	4	1.11394	1.07918	1.14613	1.25527	-0.0347621	0.0669468	0.109144	2	2	2	2	39	47	95	79	47	48	54	51	0	2
722325.25-2994677.19	5UG-LH5406	5UG-LH	2011	2012	2013	2014	5406	5406	SP	CB	Alive	Alive	Alive	Alive				0	0	0	0	22	19	33	35	-3	14	2	1.36173	1.30103	1.53148	1.5563	-0.0606978	0.230449	0.0248236	2	2	2	2	19	29	31	53	47	41	43	74	0	3
722328.30-2994676.49	5UG-LH5407	5UG-LH	2011	2012	2013	2014	5407	5407	SP	CB	Alive	Alive	Alive	Alive				0	0	0	0	50	48	54	54	-2	6	0	1.70757	1.6902	1.74036	1.74036	-0.0173741	0.0501666	0	2	2	2	2	37	33	53	38	52	48	62	56	2	6
722328.60-2994674.86	5UG-LH5409	5UG-LH	2011	2012	2013	2014	5409	5409	SP	CB	Alive	Alive	Alive	Alive				0	0	0	0	9	10	13	11	1	3	-2	1	1.04139	1.14613	1.07918	0.0413927	0.104735	-0.0669468	1	2	2	2	19	32	35	43	40	46	34	35	0	0
722328.37-2994676.06	5UG-LH5410	5UG-LH	2011	2012	2013	2014	5410	5410	SP	CB	Alive	Alive	Unknown	Dead				0	0	1		6	7			1			0.845098	0.90309			0.0579919			1	1			19	12			45	40			0	0
722329.85-2994676.51	5UG-LH5411	5UG-LH	2011	2012	2013	2014	5411	5411	SP	CB	Alive	Alive	Alive	Alive				0	0	0	0	35	36	36	36	1	0	0	1.5563	1.5682	1.5682	1.5682	0.0118992	0	0	2	2	2	2	28	49	69	43	44	45	48	43	0	3
722329.78-2994678.47	5UG-LH5412	5UG-LH	2011	2012	2013	2014	5412	5412	SP	CB	Alive	Alive	Alive	Dead				0	0	0	1	5	7	10		2	3		0.778151	0.90309	1.04139		0.124939	0.138303		1	1	2		12	26	0		34	36	0		0	0
	5UG-LH5413	5UG-LH				2014	5413		SP	CB				Alive							0				102							2.01284							3				28				50
722329.07-2994680.29	5UG-LH5414	5UG-LH	2011	2012	2013	2014	5414	5414	SP	CB	Alive	Alive	Alive	Alive				0	0	0	0	14	21	19	19	7	-2	0	1.17609	1.34242	1.30103	1.30103	0.166331	-0.0413927	0	2	2	2	2	39	63	66	60	54	53	53	54	2	4
722327.32-2994678.00	5UG-LH5415	5UG-LH	2011	2012	2013	2014	5415	5415	SP	CB	Alive	Alive	Alive	Alive				0	0	0	0	48	44	47	48	-4	3	1	1.6902	1.65321	1.68124	1.6902	-0.0369836	0.0280287	0.00895484	2	2	2	2	50	43	58	37	54	44	51	49	1	3
722515.06-2994947.70	1G-UH5416	1G-UH		2012	2013		5416	5416	CP	SC		Alive	Dead		1				0	1			1							0.30103							1				1				5				0
722508.62-2994952.10	1G-UH5417	1G-UH	2011	2012	2013	2014	5417	5417	CP	SC	Alive	Alive	Alive	Alive				0	0	0	0	175	168	165	171	-7	-3	6	2.24551	2.22789	2.22011	2.23553	-0.017626	-0.00777862	0.0154204	3	3	3	3	56	40	60	43	59	49	65	62	0	0
722362.77-2994685.91	4UG-HH5418	4UG-HH	2011	2012	2013	2014	5418	5418	SP	CA	Alive	Alive	Alive	Alive				0	0	0	0	35	36	37	37	1	1	0	1.5563	1.5682	1.57978	1.57978	0.0118992	0.0115819	0	2	2	2	2	35	37	64	47	55	57	67	56	3	3
722364.79-2994685.20	4UG-HH5419	4UG-HH	2011	2012	2013	2014	5419	5419	SP	CA	Alive	Alive	Alive	Alive				0	0	0	0	17	13	18	20	-4	5	2	1.25527	1.14613	1.27875	1.32222	-0.109144	0.132626	0.0434657	2	2	2	2	20	39	72	50	39	43	42	43	0	0
722362.40-2994687.49	5UG-LH5420	5UG-LH	2011	2012	2013	2014	5420	5420	SP	CB	Alive	Alive	Alive	Alive				0	0	0	0	179	172	181	183	-7	9	2	2.25527	2.23805	2.26007	2.26482	-0.0172264	0.0220253	0.00474644	3	3	3	3	40	37	40	30	58	56	62	34	9	13
722362.44-2994686.60	4UG-HH5421	4UG-HH	2011	2012	2013	2014	5421	5421	SP	CA	Alive	Alive	Alive	Alive				0	0	0	0	410	418	425	430	8	7	5	2.61384	2.62221	2.62941	2.63448	0.0083722	0.00719558	0.00506767	4	4	4	4	48	25	56	57	51	35	30	43	25	15
722366.65-2994686.76	4UG-HH5422	4UG-HH	2011	2012	2013	2014	5422	5422	SP	CA	Alive	Alive	Alive	Alive				0	0	0	0	57	54	52	56	-3	-2	4	1.76343	1.74036	1.72428	1.75587	-0.0230653	-0.0160868	0.031599	2	2	2	2	31	43	43	46	44	49	48	47	2	6
722366.62-2994679.17	4UG-HH5423	4UG-HH	2011	2012	2013	2014	5423	5423	SP	CA	Alive	Alive	Alive	Alive				0	0	0	0	68	66	61	64	-2	-5	3	1.83885	1.82607	1.79239	1.81291	-0.0127743	-0.0336831	0.0205217	2	2	2	2	30	26	37	38	58	49	63	57	3	6
722371.77-2994674.61	4UG-HH5425	4UG-HH	2011	2012	2013	2014	5425	5425	SP	CA	Alive	Alive	Alive	Alive				0	0	0	0	25	24	28	25	-1	4	-3	1.41497	1.39794	1.4624	1.41497	-0.0170333	0.064458	-0.0474246	2	2	2	2	30	27	33	25	43	46	44	44	2	6
722370.99-2994676.02	4UG-HH5426	4UG-HH	2011	2012	2013	2014	5426	5426	SP	CA	Alive	Alive	Alive	Alive				0	0	0	0	23	22	22	19	-1	0	-3	1.38021	1.36173	1.36173	1.30103	-0.0184834	0	-0.0606978	2	2	2	2	25	41	55	37	40	44	46	47	0	4
722371.44-2994675.96	4UG-HH5427	4UG-HH	2011	2012	2013	2014	5427	5427	SP	CA	Alive	Alive	Alive	Alive				0	0	0	0	32	32	37	34	0	5	-3	1.51851	1.51851	1.57978	1.54407	0	0.0612697	-0.0357156	2	2	2	2	24	35	59	38	44	47	54	49	3	5
722370.44-2994676.03	4UG-HH5428	4UG-HH	2011	2012	2013	2014	5428	5428	SP	CA	Alive	Alive	Alive	Alive				0	0	0	0	73	64	65	69	-9	1	4	1.86923	1.81291	1.81954	1.8451	-0.0563184	0.00663058	0.0255541	2	2	2	2	28	18	49	47	44	39	42	40	3	3
722376.13-2994674.96	4UG-HH5429	4UG-HH	2011	2012	2013		5429	5429	SP	CA	Alive	Alive	Alive					0	0	0		19	17	15		-2	-2		1.30103	1.25527	1.20412		-0.0457575	-0.0511525		2	2	2		15	18	0	0	35	34	0		0	0
722372.97-2994681.90	4UG-HH5430	4UG-HH	2011	2012	2013	2014	5430	5430	SP	CA	Alive	Alive	Alive	Alive				0	0	0	0	32	32	34	37	0	2	3	1.51851	1.51851	1.54407	1.57978	0	0.0255541	0.0357156	2	2	2	2	26	32	56	46	52	55	58	59	0	5
722370.90-2994680.09	4UG-HH5431	4UG-HH	2011	2012	2013	2014	5431	5431	SP	CA	Alive	Alive	Alive	Alive				0	0	0	0	108	108	113	112	0	5	-1	2.03743	2.03743	2.0569	2.05308	0	0.0194784	-0.00382641	3	3	3	3	28	37	43	42	46	49	51	47	4	8
722369.82-2994683.34	4UG-HH5432	4UG-HH	2011	2012	2013	2014	5432	5432	SP	CA	Alive	Alive	Alive	Alive				0	0	0	0	102	102	103	110	0	1	7	2.01284	2.01284	2.01703	2.04532	0	0.00419611	0.0282896	3	3	3	3	29	28	38	39	52	46	56	55	4	7
722373.35-2994688.85	4UG-HH5433	4UG-HH	2011	2012	2013	2014	5433	5433	SP	CA	Alive	Alive	Alive	Alive				0	0	0	0	140	136	142	138	-4	6	-4	2.14922	2.13672	2.15534	2.14301	-0.0124985	0.0186155	-0.0123212	3	3	3	3	29	29	35	27	43	42	50	36	0	7
722505.05-2994946.66	1G-UH5435	1G-UH	2011	2012	2013	2014	5435	5435	CP	SC	Alive	Alive	Alive	Alive				0	0	0	0	164	163	162	171	-1	-1	9	2.21748	2.21484	2.21219	2.23553	-0.0026401	-0.00265624	0.0233408	3	3	3	3	38	38	60	51	56	52	65	65	0	0
722506.34-2994947.82	1G-UH5436	1G-UH	2011	2012	2013	2014	5436	5436	CP	SC	Alive	Alive	Alive	Alive				0	0	0	0	126	124	127	132	-2	3	5	2.1038	2.09691	2.10721	2.12385	-0.00689371	0.0103	0.0166417	3	3	3	3	38	44	48	39	52	50	58	70	0	0
722331.09-2994679.46	5UG-LH5436	5UG-LH	2011	2012	2013		5436	5436	SP	CB	Alive	Alive	Alive					0	0	0		99	109	99		10	-10		2	2.04139	2		0.0413927	-0.0413927		2	3	2		41	40	33		52	48	53		3	7
722375.69-2994688.76	4UG-HH5438	4UG-HH	2011	2012	2013	2014	5438	5438	SP	CA	Alive	Alive	Alive	Alive				0	0	0	0	22	19	24	20	-3	5	-4	1.36173	1.30103	1.39794	1.32222	-0.0606978	0.09691	-0.0757207	2	2	2	2	33	49	35	37	44	52	52	44	0	6
722373.45-2994684.35	4UG-HH5439	4UG-HH	2011	2012	2013	2014	5439	5439	SP	CA	Alive	Alive	Alive	Alive				0	0	0	0	300	310	310	310	10	0	0	2.47857	2.49276	2.49276	2.49276	0.0141939	0	0	4	4	4	4	85	76	60	40	78	78	77	66	16	12
722377.32-2994683.89	4UG-HH5440	4UG-HH	2011	2012	2013	2014	5440	5440	SP	CA	Alive	Alive	Alive	Alive				0	0	0	0	38	37	42	39	-1	5	-3	1.59106	1.57978	1.63347	1.60206	-0.011281	0.0536849	-0.0314085	2	2	2	2	24	29	56	47	39	46	45	47	0	7
722378.91-2994682.35	4UG-HH5441	4UG-HH	2011	2012	2013	2014	5441	5441	SP	CA	Alive	Alive	Alive	Alive				0	0	0	0	23	23	30	37	0	7	7	1.38021	1.38021	1.49136	1.57978	0	0.11115	0.0884219	2	2	2	2	31	34	52	34	45	46	50	47	1	5
722379.28-2994677.97	4UG-HH5442	4UG-HH	2011	2012	2013	2014	5442	5442	SP	CA	Alive	Alive	Alive	Alive				0	0	0	0	102	95	106	100	-7	11	-6	2.01284	1.98227	2.02938	2.00432	-0.030566	0.0471125	-0.0250624	3	2	3	3	23	29	33	30	49	50	58	50	0	6
722380.56-2994676.90	4UG-HH5444	4UG-HH	2011	2012	2013	2014	5444	5444	SP	CA	Alive	Alive	Alive	Alive				0	0	0	0	38	35	43	37	-3	8	-6	1.59106	1.5563	1.64345	1.57978	-0.0347621	0.0871502	-0.0636691	2	2	2	2	36	37	44	31	49	51	49	50	0	4
722385.35-2994672.52	4UG-HH5445	4UG-HH	2011	2012	2013	2014	5445	5445	SP	CA	Alive	Alive	Alive	Alive				0	0	0	0	7	10	10	10	3	0	0	0.90309	1.04139	1.04139	1.04139	0.138303	0	0	2	2	2	2	23	28	24	28	34	37	42	40	0	0
722384.13-2994675.74	4UG-HH5446	4UG-HH	2011	2012	2013	2014	5446	5446	SP	CA	Alive	Alive	Alive	Alive				0	0	0	0	18	20	23	23	2	3	0	1.27875	1.32222	1.38021	1.38021	0.0434657	0.0579919	0	2	2	2	2	25	57	55	40	49	59	56	52	0	0
722383.78-2994676.65	4UG-HH5447	4UG-HH	2011	2012	2013	2014	5447	5447	SP	CA	Alive	Alive	Alive	Alive				0	0	0	0	40	42	46	46	2	4	0	1.61278	1.63347	1.6721	1.6721	0.0206846	0.0386294	0	2	2	2	2	35	48	59	47	51	54	60	54	3	5
722386.93-2994671.43	4UG-HH5448	4UG-HH	2011	2012	2013	2014	5448	5448	SP	CA	Alive	Alive	Unknown	NSE				0	0	1		8	8			0			0.954243	0.954243			0			1	1			13	17			34	38			0
722382.37-2994670.44	4UG-HH5449	4UG-HH	2011	2012	2013	2014	5449	5449	SP	CA	Alive	Alive	Alive	Alive				0	0	0	0	104	103	103	107	-1	0	4	2.02119	2.01703	2.01703	2.03342	-0.00415596	0	0.0163904	3	3	3	3	31	27	33	33	56	48	53	52	3	5
722377.04-2994673.56	4UG-HH5450	4UG-HH	2011	2012	2013	2014	5450	5450	SP	CA	Alive	Alive	Alive	Alive				0	0	0	0	114	113	124	120	-1	11	-4	2.0607	2.0569	2.09691	2.08279	-0.00379299	0.0400052	-0.0141246	3	3	3	3	39	36	47	45	57	52	53	50	3	2
722377.31-2994674.46	4UG-HH5451	4UG-HH	2011	2012	2013	2014	5451	5451	SP	CA	Alive	Alive	Alive	Alive				0	0	0	0	21	14	21	21	-7	7	0	1.34242	1.17609	1.34242	1.34242	-0.166331	0.166331	0	2	2	2	2	32	43	59	46	44	58	63	56	0	4
722377.90-2994677.10	4UG-HH5452	4UG-HH	2011	2012	2013	2014	5452	5452	SP	CA	Alive	Alive	Alive	Alive				0	0	0	0	51	47	51	48	-4	4	-3	1.716	1.68124	1.716	1.6902	-0.0347621	0.0347621	-0.0258073	2	2	2	2	27	40	56	57	49	46	57	50	0
722376.30-2994674.07	4UG-HH5453	4UG-HH	2011	2012	2013	2014	5453	5453	SP	CA	Alive	Alive	Alive	Alive				0	0	0	0	21	16	18	18	-5	2	0	1.34242	1.23045	1.27875	1.27875	-0.111974	0.0483047	0	2	2	2	2	31	49	58	46	54	55	59	47	0	0
722371.67-2994672.78	4UG-HH5454	4UG-HH	2011	2012	2013	2014	5454	5454	SP	CA	Alive	Alive	Alive	Alive				0	0	0	0	50	42	53	54	-8	11	1	1.70757	1.63347	1.73239	1.74036	-0.0741017	0.0989253	0.00796893	2	2	2	2	39	37	58	53	59	64	64	63	3	5
722369.10-2994672.53	4UG-HH5455	4UG-HH	2011	2012	2013	2014	5455	5455	SP	CA	Alive	Alive	Alive	Alive				0	0	0	0	150	144	147	147	-6	3	0	2.17898	2.16137	2.17026	2.17026	-0.0176089	0.00889371	0	3	3	3	3	30	29	33	25	59	45	55	50	4	5
722372.31-2994671.84	4UG-HH5456	4UG-HH	2011	2012	2013	2014	5456	5456	SP	CA	Alive	Alive	Alive	Alive				0	0	0	0	50	49	54	47	-1	5	-7	1.70757	1.69897	1.74036	1.68124	-0.00860017	0.0413927	-0.0591215	2	2	2	2	64	48	61	63	50	56	59	62	5	3
722373.97-2994671.93	4UG-HH5457	4UG-HH	2011	2012	2013	2014	5457	5457	SP	CA	Alive	Alive	Alive	Alive				0	0	0	0	15	9	14	8	-6	5	-6	1.20412	1	1.17609	0.954243	-0.20412	0.176091	-0.221849	2	1	2	1	22	33	29	42	32	29	27	36	0	0
722374.57-2994669.82	4UG-HH5458	4UG-HH	2011	2012	2013	2014	5458	5458	SP	CA	Alive	Alive	Alive	Alive				0	0	0	0	31	30	31	27	-1	1	-4	1.50515	1.49136	1.50515	1.44716	-0.0137883	0.0137883	-0.0579919	2	2	2	2	73	79	84	41	56	53	53	54	0	0
722373.95-2994667.37	4UG-HH5459	4UG-HH	2011	2012	2013	2014	5459	5459	SP	CA	Alive	Alive	Alive	Alive				0	0	0	0	18	16	19	23	-2	3	4	1.27875	1.23045	1.30103	1.38021	-0.0483047	0.0705811	0.0791812	2	2	2	2	23	42	58	47	44	49	57	54	2	0
722373.46-2994665.49	4UG-HH5460	4UG-HH	2011	2012	2013	2014	5460	5460	SP	CA	Alive	Alive	Alive	Alive				0	0	0	0	0	4	4	4	4	0	0	0	0.69897	0.69897	0.69897	0.69897	0	0	1	1	1	1	23	56	58	47	47	53	56	59	0	0
722373.29-2994664.92	4UG-HH5461	4UG-HH	2011	2012	2013	2014	5461	5461	SP	CA	Alive	Alive	Unknown	Dead				0	0	1		0							0							1				20				40				0
722375.96-2994669.27	4UG-HH5462	4UG-HH	2011	2012	2013	2014	5462	5462	SP	CA	Alive	Alive	Alive	Alive				0	0	0	0	20	20	21	20	0	1	-1	1.32222	1.32222	1.34242	1.32222	0	0.0202034	-0.0202034	2	2	2	2	35	40	38	42	59	57	61	54	2	3
722376.87-2994669.01	4UG-HH5463	4UG-HH	2011	2012	2013	2014	5463	5463	SP	CA	Alive	Alive	Alive	Alive				0	0	0	0	18	18	24	18	0	6	-6	1.27875	1.27875	1.39794	1.27875	0	0.119186	-0.119186	2	2	2	2	28	52	67	41	40	44	41	50	0	0
722380.71-2994668.90	4UG-HH5464	4UG-HH	2011	2012	2013	2014	5464	5464	SP	CA	Alive	Alive	Alive	Alive				0	0	0	0	111	113	121	115	2	8	-6	2.04922	2.0569	2.08636	2.06446	0.00768683	0.029455	-0.0219018	3	3	3	3	46	40	49	52	60	57	52	0	3	5
722383.25-2994667.47	4UG-HH5465	4UG-HH	2011	2012	2013	2014	5465	5465	SP	CA	Alive	Alive	Alive	Alive				0	0	0	0	130	121	130	130	-9	9	0	2.11727	2.08636	2.11727	2.11727	-0.0309115	0.0309115	0	3	3	3	3	36	24	28	45	53	43	46	49	5	0
722505.63-2994949.65	1G-UH5467	1G-UH	2011	2012	2013	2014	5467	5467	CP	SC	Alive	Alive	Alive	Alive				0	0	0	0		97	97	96		0	-1		1.99123	1.99123	1.98677		0	-0.00445434		2	2	2		26	32	21		43	50	40	0	0
722376.21-2994674.55	4UG-HH5468	4UG-HH	2011	2012	2013	2014	5468	5468	SP	CA	Alive	Alive	Alive	Alive				0	0	0	0	234	236	252	252	2	16	0	2.37107	2.37475	2.40312	2.40312	0.00368048	0.0283722	0	3	3	4	4	58	46	31	50	74	60	58	52	11	10
722377.81-2994674.38	4UG-HH5469	4UG-HH	2011	2012	2013	2014	5469	5469	SP	CA	Alive	Alive	Alive	Alive				0	0	0	0	18	19	22	20	1	3	-2	1.27875	1.30103	1.36173	1.32222	0.0222764	0.0606978	-0.0395085	2	2	2	2	35	36	36	60	40	38	39	48	0	0
722482.67-2994922.18	1G-UH5470	1G-UH	2011	2012	2013	2014	5470	5470	CP	SC	Alive	Alive	Alive	Dead				0	0	0	1	380	373	370		-7	-3		2.58092	2.57287	2.56937		-0.00805337	-0.00349769		4	4	4		65	49	42		72	61	53		0	0
722480.48-2994931.43	1G-UH5471	1G-UH	2011	2012	2013	2014	5471	5471	CP	SC	Alive	Alive	Alive	Alive				0	0	0	0	242	238	245	262	-4	7	17	2.38561	2.3784	2.39094	2.41996	-0.00720837	0.0125372	0.0290206	3	3	3	4	49	40	67	51	67	61	70	72	0	0
722481.45-2994928.22	1G-UH5472	1G-UH	2011	2012	2013	2014	5472	5472	CP	SC	Alive	Alive	Alive	Alive				0	0	0	0		438	460	460		22	0		2.64246	2.6637	2.6637		0.0212364	0			4	4	70	54	80	88	60	43	70	49	0	0
722485.11-2994930.31	1G-UH5473	1G-UH	2011	2012	2013	2014	5473	5473	CP	SC	Alive	Alive	Alive	Alive				0	0	0	0	280	270	273	284	-10	3	11	2.44871	2.43297	2.43775	2.45484	-0.015737	0.00478127	0.0170943	4	4	4	4	45	48	60	62	73	58	52	59	0	0
722486.29-2994930.84	1G-UH5474	1G-UH	2011	2012	2013	2014	5474	5474	CP	SC	Alive	Alive	Alive	Alive				0	0	0	0	320	327	320	321	7	-7	1	2.50651	2.51587	2.50651	2.50786	0.00936881	-0.00936881	0.00135084	4	4	4	4	70	62	65	100	66	49	62	61	0	0
722485.87-2994933.62	1G-UH5475	1G-UH	2011	2012	2013	2014	5475	5475	CP	SC	Alive	Alive	Alive	Alive				0	0	0	0	241	237	250	256	-4	13	6	2.38382	2.37658	2.39967	2.40993	-0.00723841	0.0230968	0.0102594	3	3	4	4	46	47	60	52	59	52	55	46	0	0
722488.92-2994928.48	1G-UH5476	1G-UH	2011	2012	2013	2014	5476	5476	CP	SC	Alive	Alive	Alive	Alive				0	0	0	0	390	386	408	409	-4	22	1	2.59218	2.58771	2.61172	2.61278	-0.00446579	0.0240123	0.00106055	4	4	4	4	70	58	65	61	70	54	60	53	0	0
722490.38-2994932.06	1G-UH5477	1G-UH	2011	2012	2013	2014	5477	5477	CP	SC	Alive	Alive	Alive	Alive				0	0	0	0	286	289	287	306	3	-2	19	2.45788	2.4624	2.45939	2.48714	0.0045161	-0.00300551	0.0277459	4	4	4	4	64	50	55	72	50	52	60	64	0	0
722496.48-2994926.56	1G-UH5478	1G-UH	2011	2012	2013	2014	5478	5478	CP	SC	Alive	Alive	Alive	Alive				0	0	0	0	470	481	485	485	11	4	0	2.67302	2.68305	2.68664	2.68664	0.0100261	0.00358923	0	4	4	4	4	70	67	73	82	70	60	65	56	0	0
722495.14-2994934.45	1G-UH5479	1G-UH	2011	2012	2013	2014	5479	5479	CP	SC	Alive	Alive	Alive	Alive				0	0	0	0		302	309	316		7	7		2.48144	2.49136	2.50106		0.00991907	0.00969757		4	4	4	60	33	70	55	70	53	60	65	0	0
722492.58-2994934.16	1G-UH5480	1G-UH	2011	2012	2013	2014	5480	5480	CP	SC	Alive	Alive	Alive	Alive				0	0	0	0	310	305	325	345	-5	20	20	2.49276	2.48572	2.51322	2.53908	-0.00703896	0.0274962	0.0258585	4	4	4	4	62	52	73	64	54	48	51	65	0	0
722492.05-2994934.62	1G-UH5481	1G-UH	2011	2012	2013	2014	5481	5481	CP	SC	Alive	Alive	Alive	Alive				0	0	0	0	224	214	220	227	-10	6	7	2.35218	2.33244	2.34439	2.35793	-0.0197441	0.0119538	0.0135426	3	3	3	3	47	41	60	47	51	51	52	64	0	0
722493.34-2994935.16	1G-UH5482	1G-UH	2011	2012	2013	2014	5482	5482	CP	SC	Alive	Alive	Alive	Alive				0	0	0	0	240	231	235	253	-9	4	18	2.38202	2.36549	2.37291	2.40483	-0.0165291	0.00742402	0.0319217	3	3	3	4	52	36	57	57	73	57	52	72	0	0
722480.49-2994937.91	1G-UH5483	1G-UH	2011	2012	2013	2014	5483	5483	CP	SC	Alive	Alive	Alive	Alive				0	0	0	0	400	412	421	430	12	9	9	2.60314	2.61595	2.62531	2.63448	0.0128057	0.0093624	0.00916482	4	4	4	4	70	52	70	90	60	72	62	72	0	0
722479.12-2994936.90	1G-UH5484	1G-UH	2011	2012	2013	2014	5484	5484	CP	SC	Alive	Alive	Alive	Alive				0	0	0	0	223	225	230	231	2	5	1	2.35025	2.35411	2.36361	2.36549	0.00386042	0.00950354	0.001876	3	3	3	3	55	47	57	68	58	55	57	57	0	0
722484.00-2994941.34	1G-UH5485	1G-UH	2011	2012	2013	2014	5485	5485	CP	SC	Alive	Alive	Alive	Alive				0	0	0	0	244	241	235	258	-3	-6	23	2.38917	2.38382	2.37291	2.4133	-0.00535072	-0.0109034	0.0403878	3	3	3	4	54	55	73	57	60	43	58	64	0	0
722483.52-2994945.85	1G-UH5486	1G-UH	2011	2012	2013	2014	5486	5486	CP	SC	Alive	Alive	Alive	Alive				0	0	0	0	248	243	240	247	-5	-3	7	2.3962	2.38739	2.38202	2.39445	-0.00880952	-0.00537278	0.0124346	3	3	3	3	49	53	57	54	54	57	60	62	0	0
722493.91-2994950.09	1G-UH5487	1G-UH	2011	2012	2013	2014	5487	5487	CP	SC	Alive	Alive	Alive	Alive				0	0	0	0	206	210	206	223	4	-4	17	2.31597	2.32428	2.31597	2.35025	0.00831211	-0.00831211	0.0342777	3	3	3	3		56	95	76		66	82	78	0	0
722493.83-2994948.75	1G-UH5488	1G-UH	2011	2012	2013	2014	5488	5488	CP	SC	Alive	Alive	Alive	Alive				0	0	0	0	189	188	190	204	-1	2	14	2.27875	2.27646	2.28103	2.31175	-0.0022918	0.00457156	0.0307205	3	3	3	3	56	57	80	62	62	63	72	72	0	0
722486.46-2994943.92	1G-UH5489	1G-UH	2011	2012	2013	2014	5489	5489	CP	SC	Alive	Alive	Alive	Alive				0	0	0	0	223	220	210	215	-3	-10	5	2.35025	2.34439	2.32428	2.33445	-0.00585574	-0.0201098	0.0101713	3	3	3	3	36	27	40	53	63	57	54	64	0	0
722495.20-2994935.61	1G-UH5490	1G-UH	2011	2012	2013	2014	5490	5490	CP	SC	Alive	Alive	Alive	Alive				0	0	0	0	203	196	203	205	-7	7	2	2.30963	2.29447	2.30963	2.31387	-0.0151639	0.0151639	0.00423705	3	3	3	3	45	34	49	39	52	44	60	46	0	0
722491.25-2994933.96	1G-UH5491	1G-UH	2011	2012	2013	2014	5491	5491	CP	SC	Alive	Alive	Alive	Alive				0	0	0	0	223	223	228	236	0	5	8	2.35025	2.35025	2.35984	2.37475	0	0.00958746	0.0149129	3	3	3	3	45	49	52	49	65	59	63	54	0	0
722494.60-2994936.61	1G-UH5492	1G-UH	2011	2012	2013	2014	5492	5492	CP	SC	Alive	Alive	Alive	Alive				0	0	0	0	194	191	194	197	-3	3	3	2.29003	2.2833	2.29003	2.29667	-0.00673338	0.00673338	0.00663058	3	3	3	3	42	31	49	41	48	48	49	60	0	0
722497.09-2994939.17	1G-UH5493	1G-UH	2011	2012	2013	2014	5493	5493	CP	SC	Alive	Alive	Alive	Alive				0	0	0	0	213	220	225	237	7	5	12	2.33041	2.34439	2.35411	2.37658	0.0139785	0.00971617	0.0224685	3	3	3	3	44	26	67	53	53	52	60	62	0	0
722497.00-2994939.03	1G-UH5494	1G-UH	2011	2012	2013	2014	5494	5494	CP	SC	Alive	Alive	Alive	Alive				0	0	0	0	328	329	352	365	1	23	13	2.5172	2.51851	2.54777	2.56348	0.00131804	0.0292608	0.0157064	4	4	4	4	60	69	80	76	70	68	60	63	0	0
722500.33-2994939.15	1G-UH5495	1G-UH	2011	2012	2013	2014	5495	5495	CP	SC	Alive	Alive	Alive	Alive				0	0	0	0	274	264	265	277	-10	1	12	2.43933	2.42325	2.42488	2.44404	-0.0160868	0.00163576	0.0191632	4	4	4	4	55	52	70	65	52	48	65	69	0	0
722499.80-2994944.73	1G-UH5496	1G-UH	2011	2012	2013	2014	5496	5496	CP	SC	Alive	Alive	Alive	Alive				0	0	0	0	126	127	125	130	1	-2	5	2.1038	2.10721	2.10037	2.11727	0.00340625	-0.00683942	0.0169008	3	3	3	3	38	38	49	39	43	48	50	59	0	0
722500.06-2994942.42	1G-UH5497	1G-UH	2011	2012	2013	2014	5497	5497	CP	SC	Alive	Alive	Alive	Alive				0	0	0	0	210	208	209	217	-2	1	8	2.32428	2.32015	2.32222	2.33846	-0.00413617	0.00207301	0.0162372	3	3	3	3	39	36	38	37	56	55	49	61	0	0
722504.89-2994942.70	1G-UH5498	1G-UH	2011	2012	2013	2014	5498	5498	CP	SC	Alive	Alive	Alive	Alive				0	0	0	0	143	145	145	159	2	0	14	2.15836	2.16435	2.16435	2.20412	0.00599036	0	0.0397671	3	3	3	3	42	37	50	43	59	49	55	61	0	0
722502.10-2994945.96	1G-UH5499	1G-UH	2011	2012	2013	2014	5499	5499	CP	SC	Alive	Alive	Alive	Alive				0	0	0	0	214	204	210	222	-10	6	12	2.33244	2.31175	2.32428	2.3483	-0.0206846	0.0125286	0.0240224	3	3	3	3	51	64	54	62	57	65	50	72	0	0
722505.53-2994948.16	1G-UH5500	1G-UH	2011	2012	2013	2014	5500	5500	CP	SC	Alive	Alive	Alive	Alive				0	0	0	0	280	278	286	300	-2	8	14	2.44871	2.4456	2.45788	2.47857	-0.00310212	0.0122777	0.0206846	4	4	4	4	55	49	92	75	58	58	65	68	0	0
722399.25-2994686.47	4UG-HH5502	4UG-HH	2011	2012	2013	2014	5502	5502	SP	CA	Alive	Alive	Alive	Alive				0	0	0	0	168	162	170	172	-6	8	2	2.22789	2.21219	2.233	2.23805	-0.0156991	0.0208085	0.00504999	3	3	3	3	36	23	60	42	60	53	59	62	3	8
722407.45-2994679.63	4UG-HH5503	4UG-HH	2011	2012	2013	2014	5503	5503	SP	CA	Alive	Alive	Alive	Alive				0	0	0	0	26	20	25	30	-6	5	5	1.43136	1.32222	1.41497	1.49136	-0.109144	0.0927541	0.0763883	2	2	2	2	39	32	80	45	60	58	63	64	2	0
722405.98-2994686.81	4UG-HH5504	4UG-HH	2011	2012	2013	2014	5504	5504	SP	CA	Alive	Alive	Alive	Alive				0	0	0	0	70	70	74	80	0	4	6	1.85126	1.85126	1.87506	1.90849	0	0.0238029	0.0334238	2	2	2	2	50	35	80	56	63	59	72	60	3	6
722407.83-2994687.93	4UG-HH5505	4UG-HH	2011	2012	2013	2014	5505	5505	SP	CA	Alive	Alive	Alive	Alive				0	0	0	0	20	30	28	25	10	-2	-3	1.32222	1.49136	1.4624	1.41497	0.169142	-0.0289637	-0.0474246	2	2	2	2	46	26	81	44	55	54	46	52	2	0
722411.77-2994690.81	4UG-HH5506	4UG-HH	2011	2012	2013	2014	5506	5506	SP	CA	Alive	Alive	Alive	Alive				0	0	0	0	43	47	45	44	4	-2	-1	1.64345	1.68124	1.66276	1.65321	0.0377886	-0.0184834	-0.00954532	2	2	2	2	38	38	50	50	64	61	67	70	2	5
722411.52-2994689.49	4UG-HH5507	4UG-HH	2011	2012	2013	2014	5507	5507	SP	CA	Alive	Alive	Alive	Alive				0	0	0	0	22	22	28	30	0	6	2	1.36173	1.36173	1.4624	1.49136	0	0.10067	0.0289637	2	2	2	2	41	44	64	55	46	41	47	47	1	6
722410.87-2994691.91	4UG-HH5508	4UG-HH	2011	2012	2013		5508	5508	SP	CA	Alive	Alive	Dead					0	0	1		14	8			-6			1.17609	0.954243			-0.221849			2	1			22	16			53	56			0	0
722411.09-2994687.86	4UG-HH5509	4UG-HH	2011	2012	2013	2014	5509	5509	SP	CA	Alive	Alive	Alive	Alive				0	0	0	0	29	22	28	30	-7	6	2	1.47712	1.36173	1.4624	1.49136	-0.115393	0.10067	0.0289637	2	2	2	2	39	29	64	40	38	49	50	45	0	8
722401.63-2994691.26	4UG-HH5510	4UG-HH	2011	2012	2013	2014	5510	5510	SP	CA	Alive	Alive	Alive	Alive				0	0	0	0	22	17	23	26	-5	6	3	1.36173	1.25527	1.38021	1.43136	-0.106455	0.124939	0.0511525	2	2	2	2	35	45	80	50	44	54	48	48	0	0
722400.21-2994689.94	4UG-HH5511	4UG-HH	2011	2012	2013	2014	5511	5511	SP	CA	Alive	Alive	Alive	Alive				0	0	0	0	28	27	22	26	-1	-5	4	1.4624	1.44716	1.36173	1.43136	-0.01524	-0.0854302	0.0696359	2	2	2	2	44	24	77	58	51	54	62	56	2	0
722403.29-2994689.62	4UG-HH5513	4UG-HH	2011	2012	2013	2014	5513	5513	SP	CA	Alive	Alive	Alive	Alive				0	0	0	0	23	18	18	24	-5	0	6	1.38021	1.27875	1.27875	1.39794	-0.101458	0	0.119186	2	2	2	2	33	42	68	60	50	57	56	52	1	0
722404.38-2994688.97	4UG-HH5514	4UG-HH	2011	2012	2013		5514	5514	SP	CA	Alive	Alive	Alive					0	0	0		8	3	8		-5	5		0.954243	0.60206	0.954243		-0.352183	0.352183		1	1	1		33	37	52		43	54	57		0	0
722403.92-2994691.28	4UG-HH5516	4UG-HH	2011	2012	2013	2014	5516	5516	SP	CA	Alive	Alive	Alive	Alive				0	0	0	0	18	16	12	16	-2	-4	4	1.27875	1.23045	1.11394	1.23045	-0.0483047	-0.116506	0.116506	2	2	2	2	33	10	68	44	44	53	60	54	1
722403.33-2994694.28	4UG-HH5517	4UG-HH	2011	2012	2013	2014	5517	5517	SP	CA	Alive	Alive	Alive	NSE				0	0	0		10	2	5		-8	3		1.04139	0.477121	0.778151		-0.564271	0.30103		2	1	1		48	23	66		59	70	67		2	0
722404.13-2994692.36	4UG-HH5518	4UG-HH	2011	2012	2013	2014	5518	5518	SP	CA	Alive	Alive	Alive	Alive				0	0	0	0	37	30	31	35	-7	1	4	1.57978	1.49136	1.50515	1.5563	-0.0884219	0.0137883	0.0511525	2	2	2	2	28	5	29	32	58	40	52	42	0	0
722402.74-2994691.67	4UG-HH5519	4UG-HH	2011	2012	2013	2014	5519	5519	SP	CA	Alive	Alive	Alive	Alive				0	0	0	0	24	15	29	25	-9	14	-4	1.39794	1.20412	1.47712	1.41497	-0.19382	0.273001	-0.0621479	2	2	2	2	45	14	46	68	57	53	65	50	3	4
722403.91-2994691.35	4UG-HH5520	4UG-HH	2011	2012	2013	2014	5520	5520	SP	CA	Alive	Alive	Alive	Alive				0	0	0	0	21	20	28	28	-1	8	0	1.34242	1.32222	1.4624	1.4624	-0.0202034	0.140179	0	2	2	2	2	19	27	28	50	39	43	45	44	0	0
722405.14-2994694.60	4UG-HH5521	4UG-HH		2012	2013	2014	5521	5521	SP	CA		Alive	Alive	Alive	1				0	0	0		6	8	12		2	4		0.845098	0.954243	1.11394		0.109144	0.159701		1	1	2		18	59	43		55	60	56		0
722405.49-2994695.88	4UG-HH5522	4UG-HH		2012	2013	2014	5522	5522	SP	CA		Alive	Alive	Alive	1				0	0	0		5	5	8		0	3		0.778151	0.778151	0.954243		0	0.176091		1	1	1		36	38	43		44	43	42		0
722408.47-2994697.19	4UG-HH5523	4UG-HH	2011	2012	2013	2014	5523	5523	SP	CA	Alive	Alive	Alive	Alive				0	0	0	0	19	16	20	22	-3	4	2	1.30103	1.23045	1.32222	1.36173	-0.0705811	0.0917704	0.0395085	2	2	2	2	36	50	65	62	50	54	52	54	2	4
722409.36-2994699.78	4UG-HH5524	4UG-HH	2011	2012	2013	2014	5524	5524	SP	CA	Alive	Alive	Alive	Alive				0	0	0	0	196	186	197	197	-10	11	0	2.29447	2.27184	2.29667	2.29667	-0.0226246	0.0248236	0	3	3	3	3	63	33	75	53	53	50	54	60	7	7
722408.43-2994701.01	4UG-HH5525	4UG-HH	2011	2012	2013	2014	5525	5525	SP	CA	Alive	Alive	Alive	Alive				0	0	0	0	15	17	15	22	2	-2	7	1.20412	1.25527	1.20412	1.36173	0.0511525	-0.0511525	0.157608	2	2	2	2	24	36	30	39	61	58	65	63	0	0
722408.74-2994700.04	4UG-HH5526	4UG-HH	2011	2012	2013	2014	5526	5526	SP	CA	Alive	Alive	Alive	Alive				0	0	0	0	14	14	15	20	0	1	5	1.17609	1.17609	1.20412	1.32222	0	0.0280287	0.118099	2	2	2	2	13	7	17	20	30	30	45	42	0	0
722409.41-2994701.61	4UG-HH5527	4UG-HH	2011	2012	2013	2014	5527	5527	SP	CA	Alive	Alive	Alive	Alive				0	0	0	0	23	27	22	32	4	-5	10	1.38021	1.44716	1.36173	1.51851	0.0669468	-0.0854302	0.156786	2	2	2	2	27	65	38	37	41	49	50	56	1	5
722414.27-2994705.62	4UG-HH5528	4UG-HH	2011	2012	2013	2014	5528	5528	SP	CA	Alive	Alive	Alive	Alive				0	0	0	0	91	95	93	100	4	-2	7	1.96379	1.98227	1.97313	2.00432	0.0184834	-0.00914338	0.0311935	2	2	2	3	46	52	37	43	49	55	54	57	7	12
722418.54-2994705.12	4UG-HH5529	4UG-HH	2011	2012	2013	2014	5529	5529	SP	CA	Alive	Alive	Alive	Alive				0	0	0	0	27	25	23	25	-2	-2	2	1.44716	1.41497	1.38021	1.41497	-0.0321847	-0.0347621	0.0347621	2	2	2	2	30	32	73	19	41	46	52	48	2	0
722417.45-2994701.79	4UG-HH5530	4UG-HH	2011	2012	2013	2014	5530	5530	SP	CA	Alive	Alive	Alive	Alive				0	0	0	0	29	20	22	20	-9	2	-2	1.47712	1.32222	1.36173	1.32222	-0.154902	0.0395085	-0.0395085	2	2	2	2	34	50	75	40	40	47	40	40	3	0
722416.27-2994697.90	4UG-HH5531	4UG-HH	2011	2012	2013	2014	5531	5531	SP	CA	Alive	Alive	Alive	Dead				0	0	0	1	19	16	17		-3	1		1.30103	1.23045	1.25527		-0.0705811	0.0248236		2	2	2		21	30	50		43	51	59		0	0
722412.19-2994697.88	4UG-HH5532	4UG-HH	2011	2012	2013	2014	5532	5532	SP	CA	Alive	Alive	Alive	Alive				0	0	0	0	9	6	9	12	-3	3	3	1	0.845098	1	1.11394	-0.154902	0.154902	0.113943	1	1	1	2	14	33	51	60	39	55	57	50	0	0
722411.20-2994695.90	4UG-HH5533	4UG-HH	2011	2012	2013	2014	5533	5533	SP	CA	Alive	Alive	Alive	Alive				0	0	0	0	66	66	70	72	0	4	2	1.82607	1.82607	1.85126	1.86332	0	0.0251835	0.0120645	2	2	2	2	39	24	41	50	50	62	60	58	4	8
722413.57-2994696.35	4UG-HH5534	4UG-HH	2011	2012	2013	2014	5534	5534	SP	CA	Alive	Alive	Alive	Alive				0	0	0	0	6	8	15	22	2	7	7	0.845098	0.954243	1.20412	1.36173	0.109144	0.249877	0.157608	2	2	2	2	24	42	53	38	55	56	62	60	0	5
722413.16-2994695.55	4UG-HH5535	4UG-HH	2011	2012	2013	2014	5535	5535	SP	CA	Alive	Alive	Alive	Alive				0	0	0	0	14	13	13	17	-1	0	4	1.17609	1.14613	1.14613	1.25527	-0.0299632	0	0.109144	2	2	2	2	29	17	38	47	39	50	48	60	0	0
722418.11-2994704.30	4UG-HH5536	4UG-HH	2011	2012	2013	2014	5536	5536	SP	CA	Alive	Alive	Alive	Alive				0	0	0	0	25	19	21	22	-6	2	1	1.41497	1.30103	1.34242	1.36173	-0.113943	0.0413927	0.0193052	2	2	2	2	20	35	48	48	43	43	50	50	0	0
722417.10-2994701.59	4UG-HH5537	4UG-HH	2011	2012	2013	2014	5537	5537	SP	CA	Alive	Alive	Alive	Alive				0	0	0	0	55	53	50	55	-2	-3	5	1.74819	1.73239	1.70757	1.74819	-0.0157943	-0.0248236	0.0406179	2	2	2	2	33	35	63	62	62	61	64	66	2	0
722418.91-2994701.31	4UG-HH5538	4UG-HH	2011	2012	2013	2014	5538	5538	SP	CA	Alive	Alive	Alive	Alive				0	0	0	0	32	29	33	40	-3	4	7	1.51851	1.47712	1.53148	1.61278	-0.0413927	0.0543577	0.0813049	2	2	2	2	38	42	61	61	46	40	50	61	2	0
722419.37-2994700.11	4UG-HH5540	4UG-HH	2011	2012	2013	2014	5540	5540	SP	CA	Alive	Alive	Alive	Alive				0	0	0	0	17	17	16	23	0	-1	7	1.25527	1.25527	1.23045	1.38021	0	-0.0248236	0.149762	2	2	2	2	26	28	60	53	48	49	58	53	1	0
722422.61-2994701.18	4UG-HH5541	4UG-HH	2011	2012	2013	2014	5541	5541	SP	CA	Alive	Alive	Alive	Dead				0	0	0	1	10	7	15		-3	8		1.04139	0.90309	1.20412		-0.138303	0.30103		2	1	2		41	14	82		46	50	66		3	0
722422.59-2994702.77	4UG-HH5542	4UG-HH	2011	2012	2013	2014	5542	5542	SP	CA	Alive	Alive	Alive	Alive				0	0	0	0	30	28	28	30	-2	0	2	1.49136	1.4624	1.4624	1.49136	-0.0289637	0	0.0289637	2	2	2	2	32	23	74	30	45	50	50	45	2	0
722420.45-2994698.37	4UG-HH5543	4UG-HH	2011	2012	2013	2014	5543	5543	SP	CA	Alive	Alive	Alive	Alive				0	0	0	0	12	6	13	11	-6	7	-2	1.11394	0.845098	1.14613	1.07918	-0.268845	0.30103	-0.0669468	2	1	2	2	17	33	64	40	38	50	50	46	0	0
722420.95-2994700.90	4UG-HH5544	4UG-HH			2013	2014	5544	5544	SP	CA			Alive	Alive		1				0	0			8	7			-1			0.954243	0.90309			-0.0511525			1	1			40	30			40	43
722419.76-2994698.91	4UG-HH5545	4UG-HH	2011	2012	2013	2014	5545	5545	SP	CA	Alive	Alive	Alive	Alive				0	0	0	0	18	16	22	22	-2	6	0	1.27875	1.23045	1.36173	1.36173	-0.0483047	0.131279	0	2	2	2	2	54	14	75	60	48	50	60	48	3	8
722417.43-2994697.52	4UG-HH5546	4UG-HH	2011	2012	2013	2014	5546	5546	SP	CA	Alive	Alive	Alive	Alive				0	0	0	0	0	3	3	5	3	0	2	0	0.60206	0.60206	0.778151	0.60206	0	0.176091	1	1	1	1	11	3	47	38	37	47	44	43	0	0
722416.40-2994695.59	4UG-HH5547	4UG-HH	2011	2012	2013	2014	5547	5547	SP	CA	Alive	Alive	Alive	Alive				0	0	0	0	14	11	18	20	-3	7	2	1.17609	1.07918	1.27875	1.32222	-0.09691	0.199572	0.0434657	2	2	2	2	19	13	61	53	36	23	50	47	0	0
722417.53-2994692.82	4UG-HH5548	4UG-HH	2011	2012	2013	2014	5548	5548	SP	CA	Alive	Alive	Alive	Alive				0	0	0	0	15	14	18	20	-1	4	2	1.20412	1.17609	1.27875	1.32222	-0.0280287	0.102662	0.0434657	2	2	2	2	30	17	43	45	48	47	65	46	0	0
722417.13-2994694.90	4UG-HH5549	4UG-HH	2011	2012	2013	2014	5549	5549	SP	CA	Alive	Alive	Alive	Alive				0	0	0	0	23	21	25	26	-2	4	1	1.38021	1.34242	1.41497	1.43136	-0.0377886	0.0725507	0.0163904	2	2	2	2	34	45	65	62	49	56	61	53	2	7
722415.11-2994692.00	4UG-HH5550	4UG-HH		2012	2013	2014	5550	5550	SP	CA		Alive	Alive	Alive					0	0	0		24	28	30		4	2		1.39794	1.4624	1.49136		0.064458	0.0289637		2	2	2		27	10	70		50	54	50		0
722410.00-2994692.00	4UG-HH5551	4UG-HH	2011	2012	2013	2014	5551	5551	SP	CA	Alive	Alive	Alive	Alive				0	0	0	0	270	290	305	315	20	15	10	2.43297	2.46389	2.48572	2.49969	0.0309237	0.0218284	0.0139657	4	4	4	4	70	96	85	45	69	64	68	70	19	14
722410.93-2994691.83	4UG-HH5552	4UG-HH	2011	2012	2013	2014	5552	5552	SP	CA	Alive	Alive	Dead	Dead				0	0	1		167	166			-1			2.22531	2.22272			-0.00259281			3	3			27	9			48	38			2	0
722411.97-2994690.08	4UG-HH5553	4UG-HH	2011	2012	2013	2014	5553	5553	SP	CA	Alive	Alive	Alive	Alive				0	0	0	0	209	207	213	215	-2	6	2	2.32222	2.31806	2.33041	2.33445	-0.00415596	0.0123504	0.00403998	3	3	3	3	45	32	50	53	55	42	60	57	12	9
722410.79-2994691.43	4UG-HH5554	4UG-HH	2011	2012	2013	2014	5554	5554	SP	CA	Alive	Alive	Alive	Alive				0	0	0	0	168	170	177	180	2	7	3	2.22789	2.233	2.25042	2.25768	0.00510941	0.0174239	0.00725857	3	3	3	3	27	32	35	30	56	60	60	65	5	7
722410.87-2994691.37	4UG-HH5555	4UG-HH	2011	2012	2013	2014	5555	5555	SP	CA	Alive	Alive	Alive	Alive				0	0	0	0	95	94	103	106	-1	9	3	1.98227	1.97772	2.01703	2.02938	-0.00454763	0.0393097	0.0123504	2	2	3	3	42	43	68	44	57	60	68	75	3	8
722411.00-2994689.34	4UG-HH5556	4UG-HH	2011	2012	2013	2014	5556	5556	SP	CA	Alive	Alive	Alive	Alive				0	0	0	0	45	43	49	48	-2	6	-1	1.66276	1.64345	1.69897	1.6902	-0.0193052	0.0555173	-0.00877392	2	2	2	2	35	36	52	43	46	47	51	50	2	5
722409.70-2994693.02	4UG-HH5557	4UG-HH	2011	2012	2013	2014	5557	5557	SP	CA	Alive	Alive	Alive	Alive				0	0	0	0	41	36	44	47	-5	8	3	1.62325	1.5682	1.65321	1.68124	-0.0550476	0.0850108	0.0280287	2	2	2	2	35	43	58	44	44	45	50	51	4	10
722410.00-2994679.33	4UG-HH5558	4UG-HH	2011	2012	2013	2014	5558	5558	SP	CA	Alive	Alive	Alive	Alive				0	0	0	0	205	204	200	204	-1	-4	4	2.31387	2.31175	2.3032	2.31175	-0.00211336	-0.0085578	0.0085578	3	3	3	3	62	36	48	45	68	61	63	70	8	8
722412.68-2994686.14	4UG-HH5559	4UG-HH	2011	2012	2013	2014	5559	5559	SP	CA	Alive	Alive	Alive	Alive				0	0	0	0	3	4	5	10	1	1	5	0.60206	0.69897	0.778151	1.04139	0.09691	0.0791812	0.263241	1	1	1	2	28	20	38	30	48	40	48	40	0	0
722410.92-2994687.91	4UG-HH5560	4UG-HH	2011	2012	2013	2014	5560	5560	SP	CA	Alive	Alive	Alive	Alive				0	0	0	0	240	254	257	259	14	3	2	2.38202	2.40654	2.41162	2.41497	0.0245231	0.00507953	0.00335364	3	4	4	4	66	37	78	40	69	56	68	65	17	13
722414.17-2994686.26	4UG-HH5561	4UG-HH	2011	2012	2013	2014	5561	5561	SP	CA	Alive	Alive	Alive	Alive				0	0	0	0	275	266	270	270	-9	4	0	2.44091	2.42651	2.43297	2.43297	-0.0143978	0.00645803	0	4	4	4	4	58	52	52	51	56	69	71	70	18	13
722415.84-2994688.86	4UG-HH5562	4UG-HH	2011	2012	2013	2014	5562	5562	SP	CA	Alive	Alive	Alive	Alive				0	0	0	0	370	383	395	390	13	12	-5	2.56937	2.58433	2.5977	2.59218	0.0149573	0.013364	-0.00551843	4	4	4	4	96	72	75	60	75	73	79	70	26	17
722420.55-2994686.81	4UG-HH5563	4UG-HH	2011	2012	2013	2014	5563	5563	SP	CA	Alive	Alive	Alive	Alive				0	0	0	0	45	40	42	41	-5	2	-1	1.66276	1.61278	1.63347	1.62325	-0.049974	0.0206846	-0.0102192	2	2	2	2	45	48	55	45	49	55	63	50	7	5
722421.67-2994691.29	4UG-HH5564	4UG-HH	2011	2012	2013	2014	5564	5564	SP	CA	Alive	Alive	Alive	Alive				0	0	0	0	197	209	220	220	12	11	0	2.29667	2.32222	2.34439	2.34439	0.0255541	0.022173	0	3	3	3	3	49	40	49	40	62	53	52	60	8	10
722418.94-2994690.26	4UG-HH5565	4UG-HH	2011	2012	2013	2014	5565	5565	SP	CA	Alive	Alive	Alive	Alive				0	0	0	0	98	100	103	100	2	3	-3	1.99564	2.00432	2.01703	2.00432	0.00868618	0.012712	-0.012712	2	3	3	3	35	33	46	35	57	36	52	50	4	0
722419.91-2994692.98	4UG-HH5566	4UG-HH	2011	2012	2013	2014	5566	5566	SP	CA	Alive	Alive	Alive	Alive				0	0	0	0	117	115	114	112	-2	-1	-2	2.07188	2.06446	2.0607	2.05308	-0.00742402	-0.00376015	-0.0076194	3	3	3	3	36	14	30	52	51	42	48	43	3	0
722418.54-2994693.94	4UG-HH5567	4UG-HH	2011	2012	2013	2014	5567	5567	SP	CA	Alive	Alive	Alive	Alive				0	0	0	0	26	24	30	30	-2	6	0	1.43136	1.39794	1.49136	1.49136	-0.0334238	0.0934217	0	2	2	2	2	34	43	95	75	49	50	54	56	2	0
722420.09-2994691.57	4UG-HH5568	4UG-HH	2011	2012	2013	2014	5568	5568	SP	CA	Alive	Alive	Alive	Alive				0	0	0	0	132	130	135	136	-2	5	1	2.12385	2.11727	2.13354	2.13672	-0.00658035	0.0162676	0.00318166	3	3	3	3	37	16	46	50	55	53	57	60	3	7
722418.09-2994692.38	4UG-HH5569	4UG-HH	2011	2012	2013	2014	5569	5569	SP	CA	Alive	Alive	Alive	Alive				0	0	0	0	16	14	19	23	-2	5	4	1.23045	1.17609	1.30103	1.38021	-0.0543577	0.124939	0.0791812	2	2	2	2	20	25	83	60	55	45	57	53	0	0
722418.51-2994696.42	4UG-HH5570	4UG-HH	2011	2012	2013	2014	5570	5570	SP	CA	Alive	Alive	Alive	Alive				0	0	0	0	16	16	20	29	0	4	9	1.23045	1.23045	1.32222	1.47712	0	0.0917704	0.154902	2	2	2	2	30	22	80	86	47	44	50	50	0	0
722421.78-2994697.75	4UG-HH5571	4UG-HH	2011	2012	2013	2014	5571	5571	SP	CA	Alive	Alive	Alive	Alive				0	0	0	0	57	59	61	63	2	2	2	1.76343	1.77815	1.79239	1.80618	0.0147233	0.0142404	0.0137883	2	2	2	2	37	40	54	54	52	57	60	57	3	7
722421.03-2994696.85	4UG-HH5572	4UG-HH	2011	2012	2013	2014	5572	5572	SP	CA	Alive	Alive	Alive	Alive				0	0	0	0	20	20	20	24	0	0	4	1.32222	1.32222	1.32222	1.39794	0	0	0.0757207	2	2	2	2	23	19	27	18	23	45	47	48	0	0
722421.43-2994696.26	4UG-HH5573	4UG-HH	2011	2012	2013	2014	5573	5573	SP	CA	Alive	Alive	Alive	Alive				0	0	0	0	48	48	54	65	0	6	11	1.6902	1.6902	1.74036	1.81954	0	0.0501666	0.0791812	2	2	2	2	57	57	74	82	50	58	59	60	4	11
722423.21-2994695.28	4UG-HH5574	4UG-HH	2011	2012	2013	2014	5574	5574	SP	CA	Alive	Alive	Alive	Alive				0	0	0	0	26	29	31	30	3	2	-1	1.43136	1.47712	1.50515	1.49136	0.0457575	0.0280287	-0.0137883	2	2	2	2	38	30	31	42	48	41	58	50	2	0
722419.96-2994694.49	4UG-HH5575	4UG-HH	2011	2012	2013	2014	5575	5575	SP	CA	Alive	Alive	Alive	Alive				0	0	0	0	19	17	20	23	-2	3	3	1.30103	1.25527	1.32222	1.38021	-0.0457575	0.0669468	0.0579919	2	2	2	2	37	33	59	60	53	45	48	50	0	0
722424.22-2994694.44	4UG-HH5576	4UG-HH	2011	2012	2013	2014	5576	5576	SP	CA	Alive	Alive	Alive	Alive				0	0	0	0	74	77	72	75	3	-5	3	1.87506	1.89209	1.86332	1.88081	0.0170333	-0.0287717	0.0174907	2	2	2	2	43	29	64	37	57	60	62	60	5	6
722426.02-2994695.08	4UG-HH5577	4UG-HH	2011	2012	2013	2014	5577	5577	SP	CA	Alive	Alive	Alive	Alive				0	0	0	0	15	13	16	13	-2	3	-3	1.20412	1.14613	1.23045	1.14613	-0.0579919	0.0843209	-0.0843209	2	2	2	2	20	25	59	25	30	45	50	42	0	0
722427.20-2994700.33	4UG-HH5578	4UG-HH	2011	2012	2013	2014	5578	5578	SP	CA	Alive	Alive	Alive	Alive				0	0	0	0	285	278	292	285	-7	14	-7	2.45637	2.4456	2.46687	2.45637	-0.0107618	0.0212634	-0.0105016	4	4	4	4	60	35	57	28	67	63	66	72	14	14
722424.76-2994697.40	4UG-HH5579	4UG-HH	2011	2012	2013	2014	5579	5579	SP	CA	Alive	Alive	Alive	Alive				0	0	0	0	285	300	310	305	15	10	-5	2.45637	2.47857	2.49276	2.48572	0.0222005	0.0141939	-0.00703896	4	4	4	4	70	52	60	40	54	50	59	70	17	16
722423.48-2994694.77	4UG-HH5580	4UG-HH	2011	2012	2013	2014	5580	5580	SP	CA	Alive	Alive	Alive	Alive				0	0	0	0	30	20	16	25	-10	-4	9	1.49136	1.32222	1.23045	1.41497	-0.169142	-0.0917704	0.184524	2	2	2	2	38	15	37	45	48	56	60	58	1	0
722420.75-2994698.66	4UG-HH5581	4UG-HH	2011	2012	2013	2014	5581	5581	SP	CA	Alive	Alive	Alive	Alive				0	0	0	0	13	13	15	18	0	2	3	1.14613	1.14613	1.20412	1.27875	0	0.0579919	0.0746336	2	2	2	2	23	36	66	54	42	59	57	54	2	0
722422.90-2994700.27	4UG-HH5582	4UG-HH	2011	2012	2013	2014	5582	5582	SP	CA	Alive	Alive	Alive	Alive				0	0	0	0	20	14	18	20	-6	4	2	1.32222	1.17609	1.27875	1.32222	-0.146128	0.102662	0.0434657	2	2	2	2	19	28	41	64	38	39	42	44	0	0
722422.17-2994698.51	4UG-HH5583	4UG-HH	2011	2012	2013	2014	5583	5583	SP	CA	Alive	Alive	Alive	Alive				0	0	0	0	58	50	55	60	-8	5	5	1.77085	1.70757	1.74819	1.78533	-0.0632818	0.0406179	0.0371418	2	2	2	2	33	22	40	60	49	46	59	52	3	0
722422.96-2994698.60	4UG-HH5584	4UG-HH	2011	2012	2013	2014	5584	5584	SP	CA	Alive	Alive	Alive	Alive				0	0	0	0	30	20	23	25	-10	3	2	1.49136	1.32222	1.38021	1.41497	-0.169142	0.0579919	0.0347621	2	2	2	2	25	33	56	50	47	41	42	44	1	0
722423.89-2994698.10	4UG-HH5585	4UG-HH	2011	2012	2013	2014	5585	5585	SP	CA	Alive	Alive	Alive	Alive				0	0	0	0	65	67	60	60	2	-7	0	1.81954	1.83251	1.78533	1.78533	0.012965	-0.0471791	0	2	2	2	2	40	33	43	35	47	46	58	54	4	5
722428.80-2994696.13	4UG-HH5586	4UG-HH	2011	2012	2013	2014	5586	5586	SP	CA	Alive	Alive	Alive	Alive				0	0	0	0	206	203	209	204	-3	6	-5	2.31597	2.30963	2.32222	2.31175	-0.00634018	0.0125891	-0.0104654	3	3	3	3	46	37	39	32	67	53	60	65	9	10
722348.57-2994675.44	5UG-LH5587	5UG-LH	2011	2012	2013	2014	5587	5587	SP	CB	Alive	Alive	Alive	Alive				0	0	0	0	20	23	25	27	3	2	2	1.32222	1.38021	1.41497	1.44716	0.0579919	0.0347621	0.0321847	2	2	2	2	22	30	57	47	49	35	47	49	0	0
722344.32-2994670.98	5UG-LH5589	5UG-LH	2011	2012	2013	2014	5589	5589	SP	CB	Alive	Alive	Alive	Alive				0	0	0	0	20	22	26	27	2	4	1	1.32222	1.36173	1.43136	1.44716	0.0395085	0.0696359	0.0157943	2	2	2	2	36	32	33	55	45	54	51	59	1	0
722341.69-2994667.82	5UG-LH5590	5UG-LH	2011	2012	2013	2014	5590	5590	SP	CB	Alive	Alive	Alive	Alive				0	0	0	0	43	40	50	49	-3	10	-1	1.64345	1.61278	1.70757	1.69897	-0.0306688	0.0947863	-0.00860017	2	2	2	2	31	28	53	55	50	50	54	57	2	0
722341.47-2994667.50	5UG-LH5591	5UG-LH	2011	2012	2013	2014	5591	5591	SP	CB	Alive	Alive	Alive	Alive				0	0	0	0	49	48	55	55	-1	7	0	1.69897	1.6902	1.74819	1.74819	-0.00877392	0.0579919	0	2	2	2	2	36	39	59	55	49	46	53	53	3	0
722318.54-2994661.56	5UG-LH5593	5UG-LH	2011	2012	2013	2014	5593	5593	SP	CB	Alive	Alive	Alive	Alive				0	0	0	0	142	145	139	145	3	-6	6	2.15534	2.16435	2.14613	2.16435	0.00901682	-0.0182248	0.0182248	3	3	3	3	43	9	53	47	42	29	49	49	4	0
722320.88-2994664.88	5UG-LH5594	5UG-LH		2012	2013	2014	5594	5594	SP	CB		Alive	Unknown	NSE	1				0	1			2							0.477121							1				2				29				0
722319.05-2994657.58	5UG-LH5595	5UG-LH		2012	2013	2014	5595	5595	SP	CB		Alive	Alive	Alive					0	0	0		90	110	116		20	6		1.95904	2.04532	2.06819		0.0862816	0.0228629		2	3	3		30	42	47		42	53	54		5
722320.28-2994658.14	5UG-LH5596	5UG-LH	2011	2012	2013	2014	5596	5596	SP	CB	Alive	Alive	Alive	Alive				0	0	0	0	62	60	52	65	-2	-8	13	1.79934	1.78533	1.72428	1.81954	-0.0140107	-0.061054	0.0952681	2	2	2	2	31	40	60	69	40	45	44	43	2	0
722319.27-2994659.98	5UG-LH5597	5UG-LH	2011	2012	2013	2014	5597	5597	SP	CB	Alive	Alive	Alive	Alive				0	0	0	0	20	20	23	29	0	3	6	1.32222	1.32222	1.38021	1.47712	0	0.0579919	0.09691	2	2	2	2	35	69	15	78	52	58	12	58	0	0
722320.68-2994659.83	5UG-LH5598	5UG-LH	2011	2012	2013	2014	5598	5598	SP	CB	Alive	Alive	Alive	Alive				0	0	0	0	25	27	33	31	2	6	-2	1.41497	1.44716	1.53148	1.50515	0.0321847	0.0843209	-0.0263289	2	2	2	2	34	34	74	64	38	50	53	54	0	0
722323.76-2994656.12	5UG-LH5599	5UG-LH	2011	2012	2013	2014	5599	5599	SP	CB	Alive	Alive	Alive	Alive				0	0	0	0	105	120	123	120	15	3	-3	2.02531	2.08279	2.09342	2.08279	0.0574795	0.0106363	-0.0106363	3	3	3	3	30	16	45	44	56	59	63	68	1	5
722325.66-2994659.06	5UG-LH5600	5UG-LH	2011	2012	2013	2014	5600	5600	SP	CB	Alive	Alive	Alive	Alive				0	0	0	0	138	142	140	147	4	-2	7	2.14301	2.15534	2.14922	2.17026	0.0123212	-0.00611692	0.0210426	3	3	3	3	32	13	38	47	47	46	50	54	3	0
722397.17-2994680.76	4UG-HH5612	4UG-HH	2011	2012	2013	2014	5612	5612	SP	CA	Alive	Alive	Alive	Alive				0	0	0	0	40	30	28	26	-10	-2	-2	1.61278	1.49136	1.4624	1.43136	-0.121422	-0.0289637	-0.0310342	2	2	2	2	28	50	86	46	43	55	54	47	0	0
722397.05-2994680.94	4UG-HH5613	4UG-HH	2011	2012	2013	2014	5613	5613	SP	CA	Alive	Alive	Alive	Alive				0	0	0	0	47	45	43	45	-2	-2	2	1.68124	1.66276	1.64345	1.66276	-0.0184834	-0.0193052	0.0193052	2	2	2	2	31	40	53	48	53	47	56	53	2	0
722396.93-2994680.58	4UG-HH5614	4UG-HH	2011	2012	2013	2014	5614	5614	SP	CA	Alive	Alive	Alive	Alive				0	0	0	0	40	40	41	45	0	1	4	1.61278	1.61278	1.62325	1.66276	0	0.0104654	0.0395085	2	2	2	2	38	56	51	20	58	49	49	38	2	4
722398.18-2994679.77	4UG-HH5615	4UG-HH	2011	2012	2013	2014	5615	5615	SP	CA	Alive	Alive	Alive	Alive				0	0	0	0	40	32	34	38	-8	2	4	1.61278	1.51851	1.54407	1.59106	-0.0942699	0.0255541	0.0469966	2	2	2	2	32	37	37	31	55	57	47	49	1	4
722398.31-2994683.32	4UG-HH5616	4UG-HH	2011	2012	2013	2014	5616	5616	SP	CA	Alive	Alive	Alive	Alive				0	0	0	0	16	20	21	28	4	1	7	1.23045	1.32222	1.34242	1.4624	0.0917704	0.0202034	0.119975	2	2	2	2	33	50	51	36	43	47	47	45	2	4
722401.08-2994679.39	4UG-HH5618	4UG-HH	2011	2012	2013	2014	5618	5618	SP	CA	Alive	Alive	Alive	Alive				0	0	0	0	2	5	7	5	3	2	-2	0.477121	0.778151	0.90309	0.778151	0.30103	0.124939	-0.124939	1	1	1	1	28	37	58	36	40	45	47	40	0	0
722400.29-2994680.40	4UG-HH5619	4UG-HH	2011	2012	2013	2014	5619	5619	SP	CA	Alive	Alive	Alive	Alive				0	0	0	0	22	23	20	20	1	-3	0	1.36173	1.38021	1.32222	1.32222	0.0184834	-0.0579919	0	2	2	2	2	30	26	51	42	50	46	43	50	0	0
722402.17-2994679.83	4UG-HH5620	4UG-HH	2011	2012	2013	2014	5620	5620	SP	CA	Alive	Alive	Alive	Alive				0	0	0	0	22	15	19	14	-7	4	-5	1.36173	1.20412	1.30103	1.17609	-0.157608	0.09691	-0.124939	2	2	2	2	29	33	55	47	50	45	46	47	0	0
722403.83-2994678.08	4UG-HH5621	4UG-HH	2011	2012	2013	2014	5621	5621	SP	CA	Alive	Alive	Alive	Alive				0	0	0	0	34	34	30	32	0	-4	2	1.54407	1.54407	1.49136	1.51851	0	-0.0527064	0.0271522	2	2	2	2	36	42	66	57	46	44	50	50	3	0
722403.66-2994681.63	4UG-HH5622	4UG-HH	2011	2012	2013	2014	5622	5622	SP	CA	Alive	Alive	Alive	Alive				0	0	0	0	140	130	130	132	-10	0	2	2.14922	2.11727	2.11727	2.12385	-0.0319478	0	0.00658035	3	3	3	3	45	33	57	25	53	48	48	49	5	8
722402.94-2994682.47	4UG-HH5623	4UG-HH	2011	2012	2013	2014	5623	5623	SP	CA	Alive	Alive	Alive	Alive				0	0	0	0	25	32	24	30	7	-8	6	1.41497	1.51851	1.39794	1.49136	0.103541	-0.120574	0.0934217	2	2	2	2	25	47	70	60	59	55	61	66	0	0
722403.72-2994683.67	4UG-HH5624	4UG-HH	2011	2012	2013	2014	5624	5624	SP	CA	Alive	Alive	Alive	Alive				0	0	0	0	5	10	11	10	5	1	-1	0.778151	1.04139	1.07918	1.04139	0.263241	0.0377886	-0.0377886	1	2	2	2	33	51	49	48	45	51	51	50	0	0
	4UG-HH5625	4UG-HH				2014	5625		SP	CA				Alive							0				5							0.778151							1				30				47
722405.12-2994678.98	4UG-HH5626	4UG-HH	2011	2012	2013	2014	5626	5626	SP	CA	Alive	Alive	Alive	Alive				0	0	0	0	20	16	13	13	-4	-3	0	1.32222	1.23045	1.14613	1.14613	-0.0917704	-0.0843209	0	2	2	2	2	19	40	50	58	40	45	50	42	0	0
722402.88-2994685.93	4UG-HH5627	4UG-HH	2011	2012	2013	2014	5627	5627	SP	CA	Alive	Alive	Alive	Alive				0	0	0	0	40	38	32	37	-2	-6	5	1.61278	1.59106	1.51851	1.57978	-0.0217192	-0.0725507	0.0612697	2	2	2	2	32	60	82	56	54	65	65	63	2	5
722401.28-2994687.39	4UG-HH5628	4UG-HH	2011	2012	2013	2014	5628	5628	SP	CA	Alive	Alive	Alive	Alive				0	0	0	0	273	287	293	297	14	6	4	2.43775	2.45939	2.46835	2.47422	0.0216419	0.00895484	0.00586893	4	4	4	4	62	54	55	42	64	57	58	63	19	13
722400.72-2994688.59	4UG-HH5629	4UG-HH	2011	2012	2013	2014	5629	5629	SP	CA	Alive	Alive	Alive	Alive				0	0	0	0	1	15	10	16	14	-5	6	0.30103	1.20412	1.04139	1.23045	0.90309	-0.162727	0.189056	1	2	2	2	20	28	29	48	44	36	41	49	0	0
722400.90-2994686.22	4UG-HH5630	4UG-HH	2011	2012	2013	2014	5630	5630	SP	CA	Alive	Alive	Alive	Alive				0	0	0	0	20	19	13	15	-1	-6	2	1.32222	1.30103	1.14613	1.20412	-0.0211893	-0.154902	0.0579919	2	2	2	2	10	41	59	35	30	42	45	42	0	0
722401.44-2994689.09	4UG-HH5631	4UG-HH	2011	2012	2013	2014	5631	5631	SP	CA	Alive	Alive	Alive	Alive				0	0	0	0	28	28	25	28	0	-3	3	1.4624	1.4624	1.41497	1.4624	0	-0.0474246	0.0474246	2	2	2	2	26	60	75	51	43	46	52	50	2	5
722401.23-2994692.48	4UG-HH5632	4UG-HH	2011	2012	2013	2014	5632	5632	SP	CA	Alive	Alive	Alive	Alive				0	0	0	0	30	29	30	36	-1	1	6	1.49136	1.47712	1.49136	1.5682	-0.0142404	0.0142404	0.07684	2	2	2	2	28	65	66	65	50	49	57	57	0	0
722400.99-2994691.47	4UG-HH5633	4UG-HH	2011	2012	2013	2014	5633	5633	SP	CA	Alive	Alive	Alive	Alive				0	0	0	0	7	6	4	6	-1	-2	2	0.90309	0.845098	0.69897	0.845098	-0.0579919	-0.146128	0.146128	1	1	1	1	9	18	23	26	40	35	40	55	0	0
722399.07-2994690.19	4UG-HH5634	4UG-HH	2011	2012	2013	2014	5634	5634	SP	CA	Alive	Alive	Alive	Alive				0	0	0	0	260	270	270	277	10	0	7	2.41664	2.43297	2.43297	2.44404	0.0163288	0	0.0110755	4	4	4	4	59	73	49	46	60	58	75	62	20	12
722402.31-2994692.41	4UG-HH5635	4UG-HH	2011	2012	2013	2014	5635	5635	SP	CA	Alive	Alive	Alive	Alive				0	0	0	0	24	24	22	25	0	-2	3	1.39794	1.39794	1.36173	1.41497	0	-0.0362122	0.0532455	2	2	2	2	30	32	33	26	44	34	46	35	0	0
722402.90-2994692.54	4UG-HH5636	4UG-HH	2011	2012	2013	2014	5636	5636	SP	CA	Alive	Alive	Alive	Alive				0	0	0	0	148	148	142	153	0	-6	11	2.17319	2.17319	2.15534	2.18752	0	-0.0178502	0.0321847	3	3	3	3	32	36	35	31	56	47	57	60	3	6
722398.50-2994691.23	4UG-HH5637	4UG-HH	2011	2012	2013	2014	5637	5637	SP	CA	Alive	Alive	Alive	Alive				0	0	0	0	248	246	246	253	-2	0	7	2.3962	2.3927	2.3927	2.40483	-0.00350239	0	0.0121368	3	3	3	4	95	54	45	45	60	60	74	66	21	11
722399.89-2994690.83	4UG-HH5638	4UG-HH	2011	2012	2013	2014	5638	5638	SP	CA	Alive	Alive	Alive	Alive				0	0	0	0	20	16	18	18	-4	2	0	1.32222	1.23045	1.27875	1.27875	-0.0917704	0.0483047	0	2	2	2	2	24	26	52	40	41	44	43	42	0	0
722398.92-2994692.89	4UG-HH5639	4UG-HH	2011	2012	2013		5639	5639	SP	CA	Alive	Alive	Dead					0	0	1		18	10			-8			1.27875	1.04139			-0.237361			2	2			33	40			40	37			0	0
722394.30-2994692.36	4UG-HH5640	4UG-HH	2011	2012	2013	2014	5640	5640	SP	CA	Alive	Alive	Alive	NSE				0	0	0		14	14	11		0	-3		1.17609	1.17609	1.07918		0	-0.09691		2	2	2		17	30	63		45	48	64		0	0
722392.67-2994691.39	4UG-HH5641	4UG-HH	2011	2012	2013		5641	5641	SP	CA	Alive	Alive	Dead					0	0	1		1	0						0.30103	0						1	1			4	9			42	50			0	0
722394.23-2994693.66	4UG-HH5642	4UG-HH	2011	2012	2013	2014	5642	5642	SP	CA	Alive	Alive	Alive	Alive				0	0	0	0	73	73	76	78	0	3	2	1.86923	1.86923	1.88649	1.89763	0	0.017259	0.0111364	2	2	2	2	38	43	40	87	45	48	52	51	5	6
722392.83-2994690.60	4UG-HH5643	4UG-HH	2011	2012	2013	2014	5643	5643	SP	CA	Alive	Alive	Alive	Alive				0	0	0	0	23	27	25	26	4	-2	1	1.38021	1.44716	1.41497	1.43136	0.0669468	-0.0321847	0.0163904	2	2	2	2	42	50	48	45	49	52	54	51	2	6
722393.56-2994692.96	4UG-HH5644	4UG-HH	2011	2012	2013	2014	5644	5644	SP	CA	Alive	Alive	Alive	Alive				0	0	0	0	12	20	20	21	8	0	1	1.11394	1.32222	1.32222	1.34242	0.208276	0	0.0202034	2	2	2	2	48	67	64	52	50	45	46	51	2	5
722391.17-2994694.97	4UG-HH5645	4UG-HH	2011	2012	2013	2014	5645	5645	SP	CA	Alive	Alive	Alive	Alive				0	0	0	0	22	22	20	22	0	-2	2	1.36173	1.36173	1.32222	1.36173	0	-0.0395085	0.0395085	2	2	2	2	40	51	68	57	49	47	54	58	2	5
722392.48-2994693.87	4UG-HH5646	4UG-HH	2011	2012	2013	2014	5646	5646	SP	CA	Alive	Alive	Unknown	Alive				0	0		0	17	20		18	3			1.25527	1.32222		1.27875	0.0669468			2	2		2	48	52		68	49	52		52	3	5
722390.37-2994694.81	4UG-HH5648	4UG-HH	2011	2012	2013		5648	5648	SP	CA	Alive	Alive	Alive					0	0	0		18	23	24		5	1		1.27875	1.38021	1.39794		0.101458	0.0177288		2	2	2		32	60	40		50	49	53		3	5
722383.06-2994696.79	4UG-HH5649	4UG-HH	2011	2012	2013	2014	5649	5649	SP	CA	Alive	Alive	Alive	Alive				0	0	0	0	33	38	38	29	5	0	-9	1.53148	1.59106	1.59106	1.47712	0.0595857	0	-0.113943	2	2	2	2	32	45	72	51	46	49	54	57	2	0
722385.01-2994696.63	4UG-HH5650	4UG-HH	2011	2012	2013	2014	5650	5650	SP	CA	Alive	Alive	Alive	Alive				0	0	0	0	28	26	32	25	-2	6	-7	1.4624	1.43136	1.51851	1.41497	-0.0310342	0.0871502	-0.103541	2	2	2	2	36	57	46	50	51	51	50	52	3	7
722386.09-2994696.42	4UG-HH5651	4UG-HH	2011	2012	2013	2014	5651	5651	SP	CA	Alive	Alive	Alive	Alive				0	0	0	0	15	19	20	20	4	1	0	1.20412	1.30103	1.32222	1.32222	0.09691	0.0211893	0	2	2	2	2	23	60	41	47	50	45	43	47	0	0
722387.79-2994697.68	4UG-HH5652	4UG-HH	2011	2012	2013	2014	5652	5652	SP	CA	Alive	Alive	Alive	Alive				0	0	0	0	14	21	23	24	7	2	1	1.17609	1.34242	1.38021	1.39794	0.166331	0.0377886	0.0177288	2	2	2	2	30	57	72	48	50	46	57	55	0	0
722385.66-2994697.02	4UG-HH5653	4UG-HH	2011	2012	2013	2014	5653	5653	SP	CA	Alive	Alive	Alive	Alive				0	0	0	0	16	18	23	19	2	5	-4	1.23045	1.27875	1.38021	1.30103	0.0483047	0.101458	-0.0791812	2	2	2	2	25	48	75	56	39	43	51	49	0	0
722384.99-2994698.72	4UG-HH5654	4UG-HH	2011	2012	2013		5654	5654	SP	CA	Alive	Alive	Dead					0	0	1		300	304			4			2.47857	2.4843			0.00573334			4	4				18				60			21	0
722383.98-2994700.76	4UG-HH5655	4UG-HH	2011	2012	2013	2014	5655	5655	SP	CA	Alive	Alive	Alive	Alive				0	0	0	0	9	13	19	15	4	6	-4	1	1.14613	1.30103	1.20412	0.146128	0.154902	-0.09691	1	2	2	2	35	3	89	72	48	52	55	55	0	0
722383.93-2994699.41	4UG-HH5656	4UG-HH	2011	2012	2013	2014	5656	5656	SP	CA	Alive	Alive	Alive	Alive				0	0	0	0	19	23	30	28	4	7	-2	1.30103	1.38021	1.49136	1.4624	0.0791812	0.11115	-0.0289637	2	2	2	2	20	60	70	58	48	53	60	59	1
722383.10-2994698.25	4UG-HH5657	4UG-HH	2011	2012	2013	2014	5657	5657	SP	CA	Alive	Alive	Alive	Alive				0	0	0	0	117	115	124	124	-2	9	0	2.07188	2.06446	2.09691	2.09691	-0.00742402	0.032452	0	3	3	3	3	35	29	33	42	49	45	55	58	3
722385.55-2994703.12	4UG-HH5659	4UG-HH	2011	2012	2013	2014	5659	5659	SP	CA	Alive	Alive	Alive	Alive				0	0	0	0	189	190	193	193	1	3	0	2.27875	2.28103	2.2878	2.2878	0.00227977	0.00676836	0	3	3	3	3	42	19	36	21	55	44	49	46	8	5
722387.39-2994704.56	4UG-HH5660	4UG-HH	2011	2012	2013	2014	5660	5660	SP	CA	Alive	Alive	Alive	Alive				0	0	0	0	9	10	12	12	1	2	0	1	1.04139	1.11394	1.11394	0.0413927	0.0725507	0	2	2	2	2	14	18	43	38	37	40	49	45	0	0
722387.58-2994703.37	4UG-HH5661	4UG-HH		2012	2013	2014	5661	5661	SP	CA		Alive	Unknown	NSE	1				0	1			0							0							1				12				45				0
722390.03-2994704.77	4UG-HH5662	4UG-HH	2011	2012	2013	2014	5662	5662	SP	CA	Alive	Alive	Alive	Alive				0	0	0	0	40	40	43	46	0	3	3	1.61278	1.61278	1.64345	1.6721	0	0.0306688	0.0286452	2	2	2	2	30	37	51	45	49	43	46	43	0	5
722390.45-2994699.78	4UG-HH5663	4UG-HH	2011	2012	2013	2014	5663	5663	SP	CA	Alive	Alive	Alive	Alive				0	0	0	0	270	283	290	290	13	7	0	2.43297	2.45332	2.46389	2.46389	0.020349	0.0105746	0	4	4	4	4	68	50	62	42	62	66	73	62	17	13
722391.19-2994699.99	4UG-HH5664	4UG-HH		2012	2013	2014	5664	5664	SP	CA		Alive	Unknown	NSE	1				0	1			0							0							1				2				45				0
722390.11-2994698.15	4UG-HH5665	4UG-HH	2011	2012	2013	2014	5665	5665	SP	CA	Alive	Alive	Alive	Alive				0	0	0	0	17	16	18	18	-1	2	0	1.25527	1.23045	1.27875	1.27875	-0.0248236	0.0483047	0	2	2	2	2	37	54	50	44	48	47	52	54	3	5
722391.31-2994697.25	4UG-HH5666	4UG-HH	2011	2012	2013	2014	5666	5666	SP	CA	Alive	Alive	Alive	Alive				0	0	0	0	180	186	186	186	6	0	0	2.25768	2.27184	2.27184	2.27184	0.014163	0	0	3	3	3	3	45	24	47	42	53	53	57	53	9	9
722401.02-2994695.25	4UG-HH5667	4UG-HH	2011	2012	2013	2014	5667	5667	SP	CA	Alive	Alive	Alive	Alive				0	0	0	0	5	0	7	5		7	-2	0.778151	0	0.90309	0.778151		0.90309	-0.124939	1	1	1	1	39	74	67	50	41	62	62	55	0	0
722400.49-2994698.18	4UG-HH5668	4UG-HH	2011	2012	2013	2014	5668	5668	SP	CA	Alive	Alive	Alive	Alive				0	0	0	0	12	14	17	16	2	3	-1	1.11394	1.17609	1.25527	1.23045	0.0621479	0.0791812	-0.0248236	2	2	2	2	29	64	70	48	51	48	53	51	3	6
722394.63-2994695.11	4UG-HH5669	4UG-HH	2011	2012	2013	2014	5669	5669	SP	CA	Alive	Alive	Alive	Alive				0	0	0	0	171	173	176	190	2	3	14	2.23553	2.24055	2.24797	2.28103	0.0050208	0.00742402	0.0330601	3	3	3	3	40	36	36	42	58	54	62	71	7	14
722404.05-2994700.02	4UG-HH5671	4UG-HH	2011	2012	2013	2014	5671	5671	SP	CA	Alive	Alive	Alive	Alive				0	0	0	0	168	170	165	176	2	-5	11	2.22789	2.233	2.22011	2.24797	0.00510941	-0.012888	0.0278652	3	3	3	3	27	16	29	25	50	38	52	45	4	0
722397.31-2994704.87	4UG-HH5672	4UG-HH	2011	2012	2013	2014	5672	5672	SP	CA	Alive	Alive	Alive	Alive				0	0	0	0	2	2	5	4	0	3	-1	0.477121	0.477121	0.778151	0.69897	0	0.30103	-0.0791812	1	1	1	1	21	28	30	27	41	52	48	52	0	0
722398.67-2994707.30	4UG-HH5673	4UG-HH	2011	2012	2013	2014	5673	5673	SP	CA	Alive	Alive	Alive	Alive				0	0	0	0	470	470	467	468	0	-3	1	2.67302	2.67302	2.67025	2.67117	0	-0.00277505	0.00092699	4	4	4	4	54	46	54	66	70	68	70	63	19	13
722401.12-2994703.47	4UG-HH5674	4UG-HH	2011	2012	2013	2014	5674	5674	SP	CA	Alive	Alive	Alive	Alive				0	0	0	0	19	14	15	15	-5	1	0	1.30103	1.17609	1.20412	1.20412	-0.124939	0.0280287	0	2	2	2	2	27	32	29	33	39	39	44	39	0	0
722401.40-2994700.52	4UG-HH5675	4UG-HH	2011	2012	2013	2014	5675	5675	SP	CA	Alive	Alive	Alive	Alive				0	0	0	0	35	40	44	51	5	4	7	1.5563	1.61278	1.65321	1.716	0.0564814	0.0404287	0.0627908	2	2	2	2	27	46	54	47	40	40	47	49	3	8
722396.43-2994706.95	4UG-HH5676	4UG-HH	2011	2012	2013	2014	5676	5676	SP	CA	Alive	Alive	Alive	Alive				0	0	0	0	23	27	30	30	4	3	0	1.38021	1.44716	1.49136	1.49136	0.0669468	0.0442037	0	2	2	2	2	54	60	75	67	50	40	55	48	0	0
722397.05-2994705.32	4UG-HH5677	4UG-HH	2011	2012	2013	2014	5677	5677	SP	CA	Alive	Alive	Alive	Alive				0	0	0	0	10	13	13	15	3	0	2	1.04139	1.14613	1.14613	1.20412	0.104735	0	0.0579919	2	2	2	2	19	41	41	61	46	54	57	54	0	0
722394.70-2994705.43	4UG-HH5678	4UG-HH	2011	2012	2013	2014	5678	5678	SP	CA	Alive	Alive	Alive	Alive				0	0	0	0	12	15	15	16	3	0	1	1.11394	1.20412	1.20412	1.23045	0.0901766	0	0.0263289	2	2	2	2	23	38	16	70	49	50	20	51	0	0
722396.57-2994709.40	4UG-HH5679	4UG-HH	2011	2012	2013	2014	5679	5679	SP	CA	Alive	Alive	Alive	Alive				0	0	0	0	14	14	13	12	0	-1	-1	1.17609	1.17609	1.14613	1.11394	0	-0.0299632	-0.0321847	2	2	2	2	16	20	30	42	43	38	16	46	0	0
722395.09-2994711.34	4UG-HH5680	4UG-HH	2011	2012	2013	2014	5680	5680	SP	CA	Alive	Alive	Alive	Alive				0	0	0	0	13	12	12	17	-1	0	5	1.14613	1.11394	1.11394	1.25527	-0.0321847	0	0.141329	2	2	2	2	31	60	93	91	38	49	53	51	0
722397.61-2994708.31	4UG-HH5681	4UG-HH	2011	2012	2013	2014	5681	5681	SP	CA	Alive	Alive	Alive	Alive				0	0	0	0	21	23	27	27	2	4	0	1.34242	1.38021	1.44716	1.44716	0.0377886	0.0669468	0	2	2	2	2	69	109	11	107	60	50	63	57	0	0
722394.50-2994705.63	4UG-HH5682	4UG-HH	2011	2012	2013	2014	5682	5682	SP	CA	Alive	Alive	Alive	Alive				0	0	0	0	23	25	36	30	2	11	-6	1.38021	1.41497	1.5682	1.49136	0.0347621	0.153228	-0.07684	2	2	2	2	20	52	35	62	39	45	56	52	0	0
722391.44-2994704.38	4UG-HH5683	4UG-HH	2011	2012	2013	2014	5683	5683	SP	CA	Alive	Alive	Alive	Alive				0	0	0	0	52	52	52	58	0	0	6	1.72428	1.72428	1.72428	1.77085	0	0	0.0465761	2	2	2	2	28	28	45	36	54	52	68	62	3	6
722389.15-2994706.25	4UG-HH5684	4UG-HH	2011	2012	2013	2014	5684	5684	SP	CA	Alive	Alive	Alive	Alive				0	0	0	0	18	20	21	24	2	1	3	1.27875	1.32222	1.34242	1.39794	0.0434657	0.0202034	0.0555173	2	2	2	2	35	70	62	48	43	47	37	54	0	0
722390.25-2994705.21	4UG-HH5685	4UG-HH	2011	2012	2013	2014	5685	5685	SP	CA	Alive	Alive	Alive	Alive				0	0	0	0	42	38	42	45	-4	4	3	1.63347	1.59106	1.63347	1.66276	-0.0424038	0.0424038	0.0292894	2	2	2	2	22	29	51	52	53	48	56	58	2	0
722386.35-2994708.04	4UG-HH5686	4UG-HH	2011	2012	2013	2014	5686	5686	SP	CA	Alive	Alive	Alive	Alive				0	0	0	0	270	280	271	274	10	-9	3	2.43297	2.44871	2.43457	2.43933	0.015737	-0.0141374	0.00476379	4	4	4	4	52	55	46	34	66	53	64	61	19	10
722388.34-2994710.81	4UG-HH5687	4UG-HH	2011	2012	2013	2014	5687	5687	SP	CA	Alive	Alive	Alive	Alive				0	0	0	0	25	26	25	32	1	-1	7	1.41497	1.43136	1.41497	1.51851	0.0163904	-0.0163904	0.103541	2	2	2	2	43	51	52	52	42	43	47	49	2	0
722396.94-2994712.08	4UG-HH5688	4UG-HH	2011	2012	2013	2014	5688	5688	SP	CA	Alive	Alive	Alive	Alive				0	0	0	0	146	140	147	147	-6	7	0	2.16732	2.14922	2.17026	2.17026	-0.0180982	0.0210426	0	3	3	3	3	26	40	38	46	48	54	60	53	5	8
722395.26-2994713.47	4UG-HH5689	4UG-HH	2011	2012	2013	2014	5689	5689	SP	CA	Alive	Alive	Alive	Alive				0	0	0	0	25	25	30	25	0	5	-5	1.41497	1.41497	1.49136	1.41497	0	0.0763883	-0.0763883	2	2	2	2	34	42	64	53	48	54	53	55	2	0
722405.05-2994709.93	4UG-HH5690	4UG-HH	2011	2012	2013	2014	5690	5690	SP	CA	Alive	Alive	Alive	Alive				0	0	0	0	5	5	5	7	0	0	2	0.778151	0.778151	0.778151	0.90309	0	0	0.124939	1	1	1	1	10	16	14	13	39	50	43	47	0	0
722403.51-2994713.64	4UG-HH5691	4UG-HH	2011	2012	2013	2014	5691	5691	SP	CA	Alive	Alive	Alive	Alive				0	0	0	0	0	0	4	5		4	1	0	0	0.69897	0.778151		0.69897	0.0791812	1	1	1	1	7	27	19	23	59	56	59	62	0	0
722405.14-2994712.65	4UG-HH5692	4UG-HH	2011	2012	2013	2014	5692	5692	SP	CA	Alive	Alive	Alive	Alive				0	0	0	0	9	9	8	14	0	-1	6	1	1	0.954243	1.17609	0	-0.0457575	0.221849	1	1	1	2	22	38	36	47	43	54	55	49	0	0
722403.48-2994714.21	4UG-HH5693	4UG-HH	2011	2012	2013	2014	5693	5693	SP	CA	Alive	Alive	Alive	Alive				0	0	0	0	15	12	12	20	-3	0	8	1.20412	1.11394	1.11394	1.32222	-0.0901766	0	0.208276	2	2	2	2	12	35	31	50	49	44	49	53	0	0
722403.97-2994712.84	4UG-HH5694	4UG-HH	2011	2012	2013	2014	5694	5694	SP	CA	Alive	Alive	Alive	Alive				0	0	0	0	19	15	14	20	-4	-1	6	1.30103	1.20412	1.17609	1.32222	-0.09691	-0.0280287	0.146128	2	2	2	2	12	39	70	57	41	43	50	52	0	0
722399.01-2994707.77	4UG-HH5695	4UG-HH	2011	2012	2013	2014	5695	5695	SP	CA	Alive	Alive	Alive	Alive				0	0	0	0	30	35	28	36	5	-7	8	1.49136	1.5563	1.4624	1.5682	0.0649408	-0.0939045	0.105804	2	2	2	2	30	52	63	39	58	55	58	58	3	0
722400.86-2994710.63	4UG-HH5696	4UG-HH	2011	2012	2013	2014	5696	5696	SP	CA	Alive	Alive	Alive	Alive				0	0	0	0	20	20	22	25	0	2	3	1.32222	1.32222	1.36173	1.41497	0	0.0395085	0.0532455	2	2	2	2	41	50	72	60	55	65	69	64	2	0
722400.88-2994712.34	4UG-HH5697	4UG-HH	2011	2012	2013	2014	5697	5697	SP	CA	Alive	Alive	Alive	Alive				0	0	0	0	14	15	16	22	1	1	6	1.17609	1.20412	1.23045	1.36173	0.0280287	0.0263289	0.131279	2	2	2	2	6	25	29	32	29	50	53	55	0	0
722407.56-2994708.82	4UG-HH5698	4UG-HH	2011	2012	2013	2014	5698	5698	SP	CA	Alive	Alive	Alive	Alive				0	0	0	0	33	30	30	34	-3	0	4	1.53148	1.49136	1.49136	1.54407	-0.0401172	0	0.0527064	2	2	2	2	23	35	27	46	48	50	53	56	2	0
722408.85-2994706.48	4UG-HH5699	4UG-HH	2011	2012	2013	2014	5699	5699	SP	CA	Alive	Alive	Alive	Alive				0	0	0	0	19	28	18	20	9	-10	2	1.30103	1.4624	1.27875	1.32222	0.161368	-0.183644	0.0434657	2	2	2	2	11	26	36	32	44	45	50	42	1	0
722410.66-2994709.95	4UG-HH5700	4UG-HH	2011	2012	2013	2014	5700	5700	SP	CA	Alive	Alive	Alive	Alive				0	0	0	0	28	21	20	20	-7	-1	0	1.4624	1.34242	1.32222	1.32222	-0.119975	-0.0202034	0	2	2	2	2	44	27	52	40	58	34	50	44	2	0
722516.41-2994946.88	1G-UH5701	1G-UH		2012	2013		5701	5701	CP	SC		Alive	Dead		1				0	1			1							0.30103							1				1				31				0
722515.23-2994946.94	1G-UH5702	1G-UH		2012	2013		5702	5702	CP	SC		Alive	Dead		1				0	1			1							0.30103							1				1				9				0
722514.35-2994945.88	1G-UH5703	1G-UH	2011	2012	2013	2014	5703	5703	CP	SC	Alive	Alive	Alive	Alive				0	0	0	0	484	485	490	490	1	5	0	2.68574	2.68664	2.69108	2.69108	0.000894531	0.00444522	0	4	4	4	4	75	84	60	70	80	65	70	60	0	0
722515.33-2994950.65	1G-UH5704	1G-UH	2011	2012	2013	2014	5704	5704	CP	SC	Alive	Alive	Alive	Alive				0	0	0	0	560	561	561	560	1	0	-1	2.74896	2.74974	2.74974	2.74896	0.000773454	0	-0.000773454	4	4	4	4	79	55		65	75	60		75	0	0
722514.96-2994946.88	1G-UH5705	1G-UH		2012	2013		5705	5705	CP	SC		Alive	Dead		1				0	1			1							0.30103							1				1				12
722518.90-2994946.17	1G-UH5706	1G-UH		2012	2013		5706	5706	CP	SC		Alive	Unknown		1				0				1							0.30103							1				1				9				0
722518.82-2994948.08	1G-UH5707	1G-UH		2012	2013		5707	5707	CP	SC		Alive	Dead		1				0	1			1							0.30103							1				1				5				0
722521.97-2994950.71	1G-UH5708	1G-UH		2012	2013		5708	5708	CP	SC		Alive	Unknown		1				0				1							0.30103							1				1				5				0
722522.21-2994952.78	1G-UH5709	1G-UH		2012	2013		5709	5709	CP	SC		Alive	Unknown		1				0				1							0.30103							1				1				5				0
722520.02-2994952.64	1G-UH5710	1G-UH	2011	2012	2013	2014	5710	5710	CP	SC	Alive	Alive	Unknown	NSE				0	0	1		2	2			0			0.477121	0.477121			0			1	1				10				60			0	0
722516.99-2994950.83	1G-UH5711	1G-UH	2011	2012	2013	2014	5711	5711	CP	SC	Alive	Alive	Alive	Alive				0	0	0	0	120	120	130	126	0	10	-4	2.08279	2.08279	2.11727	2.1038	0	0.0344859	-0.0134676	3	3	3	3	45	35	57	37	62	60	63	60	0	0
722515.89-2994948.62	1G-UH5712	1G-UH		2012	2013	2014	5712	5712	CP	SC		Alive	Unknown	NSE	1				0	1			1							0.30103							1				1				6				0
722516.79-2994955.25	1G-UH5713	1G-UH	2011	2012	2013	2014	5713	5713	CP	SC	Alive	Alive	Alive	Alive				0	0	0	0	215	215	214	210	0	-1	-4	2.33445	2.33445	2.33244	2.32428	0	-0.00201529	-0.008156	3	3	3	3	46	60	94	70	59	60	60	70	0	0
722523.54-2994952.24	1G-UH5714	1G-UH		2012	2013		5714	5714	CP	SC		Alive	Unknown		1				0				1							0.30103							1				1				9				0
722561.84-2995004.83	2G-HH5715	2G-HH	2011	2012	2013	2014	5715	5715	CP	CA	Alive	Alive	Alive	Alive				0	0	0	0	18	10	14	10	-8	4	-4	1.27875	1.04139	1.17609	1.04139	-0.237361	0.134699	-0.134699	2	2	2	2	21	21	15	10	33	41	29	30	0	0
722560.18-2995005.43	2G-HH5716	2G-HH	2011	2012	2013	2014	5716	5716	CP	CA	Alive	Alive	Alive	Alive				0	0	0	0	198	200	200	210	2	0	10	2.29885	2.3032	2.3032	2.32428	0.00434298	0	0.0210864	3	3	3	3	52	28	58	40	62	53	63	60	12	13
722560.55-2995006.69	2G-HH5717	2G-HH	2011	2012	2013	2014	5717	5717	CP	CA	Alive	Alive	Alive	Alive				0	0	0	0	28	30	28	35	2	-2	7	1.4624	1.49136	1.4624	1.5563	0.0289637	-0.0289637	0.0939045	2	2	2	2	66	49	44	32	61	64	60	47	3	4
722559.55-2995003.39	2G-HH5718	2G-HH	2011	2012	2013	2014	5718	5718	CP	CA	Alive	Alive	Alive	Alive				0	0	0	0	17	19	14	16	2	-5	2	1.25527	1.30103	1.17609	1.23045	0.0457575	-0.124939	0.0543577	2	2	2	2	67	40	60	20	59	60	64	46	3	3
722559.37-2995001.58	2G-HH5719	2G-HH	2011	2012	2013	2014	5719	5719	CP	CA	Alive	Alive	Alive	Alive				0	0	0	0	420	420	414	440	0	-6	26	2.62428	2.62428	2.61805	2.64444	0	-0.006234	0.0263905	4	4	4	4	60	56	52	50	60	60	63	60	11	19
722557.58-2995002.61	2G-HH5720	2G-HH	2011	2012	2013	2014	5720	5720	CP	CA	Alive	Alive	Alive	Alive				0	0	0	0	84	80	81	90	-4	1	9	1.92942	1.90849	1.91381	1.95904	-0.0209339	0.00532883	0.0452275	2	2	2	2		32	48	97		45	56	50	3	4
722557.97-2995004.71	2G-HH5721	2G-HH	2011	2012	2013	2014	5721	5721	CP	CA	Alive	Alive	Alive	Alive				0	0	0	0	153	153	148	165	0	-5	17	2.18752	2.18752	2.17319	2.22011	0	-0.0143345	0.0469218	3	3	3	3	44	27	43	37	49	52	55	47	14	9
722559.71-2995005.69	2G-HH5722	2G-HH	2011	2012	2013	2014	5722	5722	CP	CA	Alive	Alive	Alive	Dead				0	0	0	1	20	19	18		-1	-1		1.32222	1.30103	1.27875		-0.0211893	-0.0222764		2	2	2		38	22	40		49	47	53		4	3
722558.82-2995002.17	2G-HH5723	2G-HH	2011	2012	2013	2014	5723	5723	CP	CA	Alive	Alive	Alive	Alive				0	0	0	0	54	75	77	85	21	2	8	1.74036	1.88081	1.89209	1.9345	0.140451	0.011281	0.0424038	2	2	2	2	42	22	49	37	55	60	65	56	12	10
722557.26-2995003.16	2G-HH5724	2G-HH	2011	2012	2013	2014	5724	5724	CP	CA	Alive	Alive	Alive	Alive				0	0	0	0	147	146	162	160	-1	16	-2	2.17026	2.16732	2.21219	2.20683	-0.00294438	0.0448703	-0.00536173	3	3	3	3	35	37	43	49	51	58	60	56	14	10
722560.39-2995001.81	2G-HH5725	2G-HH	2011	2012	2013	2014	5725	5725	CP	CA	Alive	Alive	Alive	Alive				0	0	0	0	168	168	170	170	0	2	0	2.22789	2.22789	2.233	2.233	0	0.00510941	0	3	3	3	3	35	36	44	40	60	56	64	70	7	9
722559.25-2994999.14	2G-HH5726	2G-HH	2011	2012	2013	2014	5726	5726	CP	CA	Alive	Alive	Alive	Alive				0	0	0	0	279	273	272	300	-6	-1	28	2.44716	2.43775	2.43616	2.47857	-0.00940747	-0.00158792	0.0424038	4	4	4	4	65	50	68	50	71	70	68	65	22	22
722560.59-2994999.24	2G-HH5727	2G-HH	2011	2012	2013	2014	5727	5727	CP	CA	Alive	Alive	Alive	Alive				0	0	0	0	9	7	9	15	-2	2	6	1	0.90309	1	1.20412	-0.09691	0.09691	0.20412	1	1	1	2	27	32	33	43	22	42	40	40	0	0
722559.30-2994997.79	2G-HH5728	2G-HH	2011	2012	2013	2014	5728	5728	CP	CA	Alive	Alive	Alive	Alive				0	0	0	0	5	2	5	4	-3	3	-1	0.778151	0.477121	0.778151	0.69897	-0.30103	0.30103	-0.0791812	1	1	1	1	5	10	12	12	31	24	32	30	0	0
722557.21-2995004.67	2G-HH5729	2G-HH	2011	2012	2013	2014	5729	5729	CP	CA	Alive	Alive	Alive	Alive				0	0	0	0	229	225	223	230	-4	-2	7	2.36173	2.35411	2.35025	2.36361	-0.0076194	-0.00386042	0.013364	3	3	3	3		46	50	40		55	62	60	12	14
722552.45-2995004.63	2G-HH5730	2G-HH	2011	2012	2013	2014	5730	5730	CP	CA	Alive	Alive	Alive	Alive				0	0	0	0	48	43	44	50	-5	1	6	1.6902	1.64345	1.65321	1.70757	-0.0467434	0.00975984	0.0543577	2	2	2	2	54	39	35	26	60	56	61	53	6	6
722551.19-2995003.28	2G-HH5731	2G-HH	2011	2012	2013	2014	5731	5731	CP	CA	Alive	Alive	Alive	Alive				0	0	0	0	1	3	4	4	2	1	0	0.30103	0.60206	0.69897	0.69897	0.30103	0.09691	0	1	1	1	1	9	12	9	5	32	32	39	12	0	0
722549.22-2995006.37	2G-HH5732	2G-HH	2011	2012	2013	2014	5732	5732	CP	CA	Alive	Alive	Alive	Alive				0	0	0	0	34	26	34	30	-8	8	-4	1.54407	1.43136	1.54407	1.49136	-0.112704	0.112704	-0.0527064	2	2	2	2	49	38	60	25	56	58	63	40	4	4
722551.84-2995004.24	2G-HH5734	2G-HH	2011	2012	2013	2014	5734	5734	CP	CA	Alive	Alive	Alive	Dead				0	0	0	1	26	24	26		-2	2		1.43136	1.39794	1.43136		-0.0334238	0.0334238		2	2	2		41	40	29		43	53	49		6	5
722549.77-2995003.74	2G-HH5735	2G-HH	2011	2012	2013	2014	5735	5735	CP	CA	Alive	Alive	Alive	Alive				0	0	0	0	79	77	82	87	-2	5	5	1.90309	1.89209	1.91908	1.94448	-0.0109954	0.0269835	0.0254046	2	2	2	2	55	28	52	35	50	51	50	50	8	6
722548.58-2995004.16	2G-HH5736	2G-HH	2011	2012	2013	2014	5736	5736	CP	CA	Alive	Alive	Alive	Alive				0	0	0	0	14	13	17	17	-1	4	0	1.17609	1.14613	1.25527	1.25527	-0.0299632	0.109144	0	2	2	2	2	26	30	22	17	54	46	44	50	0	0
722550.47-2995005.05	2G-HH5737	2G-HH	2011	2012	2013	2014	5737	5737	CP	CA	Alive	Alive	Alive	Dead				0	0	0	1	7	8	19		1	11		0.90309	0.954243	1.30103		0.0511525	0.346787		1	1	2		9	50	22		35	59	39		0	2
722549.88-2995001.54	2G-HH5738	2G-HH	2011	2012	2013	2014	5738	5738	CP	CA	Alive	Alive	Alive	Dead				0	0	0	1	17	15	16		-2	1		1.25527	1.20412	1.23045		-0.0511525	0.0263289		2	2	2		38	34	48		39	40	42		4	2
722551.83-2995001.69	2G-HH5739	2G-HH	2011	2012	2013	2014	5739	5739	CP	CA	Alive	Alive	Alive	Alive				0	0	0	0		33	44	44		11	0		1.53148	1.65321	1.65321		0.121734	0		2	2	2	1	59	46	25	35	63	55	50	0	4
722553.78-2995005.77	2G-HH5740	2G-HH	2011	2012	2013	2014	5740	5740	CP	CA	Alive	Alive	Alive	Alive				0	0	0	0	27	24	26	27	-3	2	1	1.44716	1.39794	1.43136	1.44716	-0.049218	0.0334238	0.0157943	2	2	2	2	59	51	78	53	45	53	45	50	3	3
722556.87-2995008.45	2G-HH5742	2G-HH	2011	2012	2013	2014	5742	5742	CP	CA	Alive	Alive	Alive	Alive				0	0	0	0	104	103	101	104	-1	-2	3	2.02119	2.01703	2.0086	2.02119	-0.00415596	-0.00843317	0.0125891	3	3	3	3	49	45	58	34	62	56	61	56	5	4
722553.98-2995010.26	2G-HH5744	2G-HH	2011	2012	2013		5744	5744	CP	CA	Alive	Alive	Dead					0	0	1		7	11			4			0.90309	1.07918			0.176091			1	2			43	36			49	47			0	0
722556.19-2995006.63	2G-HH5745	2G-HH	2011	2012	2013	2014	5745	5745	CP	CA	Alive	Alive	Alive	Alive				0	0	0	0	61	57	60	65	-4	3	5	1.79239	1.76343	1.78533	1.81954	-0.0289637	0.0219018	0.0342141	2	2	2	2	53	50	48	25	54	52	50	47	9	7
722555.94-2995012.34	2G-HH5746	2G-HH	2011	2012	2013	2014	5746	5746	CP	CA	Alive	Alive	Alive	Alive				0	0	0	0	44	47	48	55	3	1	7	1.65321	1.68124	1.6902	1.74819	0.0280287	0.00895484	0.0579919	2	2	2	2	49	36	47	33	61	63	62	50	5	5
722555.50-2995010.44	2G-HH5747	2G-HH	2011	2012	2013	2014	5747	5747	CP	CA	Alive	Alive	Alive	Alive				0	0	0	0	29	27	27	32	-2	0	5	1.47712	1.44716	1.44716	1.51851	-0.0299632	0	0.0713559	2	2	2	2	49	49	52	28	49	50	47	43	3	4
722553.76-2995011.31	2G-HH5748	2G-HH	2011	2012	2013	2014	5748	5748	CP	CA	Alive	Alive	Alive	Alive				0	0	0	0	100	100	102	100	0	2	-2	2.00432	2.00432	2.01284	2.00432	0	0.00851585	-0.00851585	3	3	3	3	29	28	34	25	47	49	47	49	2	3
722553.06-2995011.17	2G-HH5749	2G-HH	2011	2012	2013	2014	5749	5749	CP	CA	Alive	Alive	Alive	Alive				0	0	0	0	20	17	15	17	-3	-2	2	1.32222	1.25527	1.20412	1.25527	-0.0669468	-0.0511525	0.0511525	2	2	2	2	69	32	39	30	50	48	37	36	2	0
722552.23-2995011.36	2G-HH5750	2G-HH	2011	2012	2013	2014	5750	5750	CP	CA	Alive	Alive	Alive	Alive				0	0	0	0	40	30	32	35	-10	2	3	1.61278	1.49136	1.51851	1.5563	-0.121422	0.0271522	0.0377886	2	2	2	2	39	37	54	30	47	51	49	46	3	3
722550.48-2995011.17	2G-HH5751	2G-HH	2011	2012	2013	2014	5751	5751	CP	CA	Alive	Alive	Alive	Dead				0	0	0	1	7	3	4		-4	1		0.90309	0.60206	0.69897		-0.30103	0.09691		1	1	1		9	12	9		35	35	32		0	0
722552.41-2995008.75	2G-HH5752	2G-HH	2011	2012	2013	2014	5752	5752	CP	CA	Alive	Alive	Alive	Alive				0	0	0	0	45	43	47	43	-2	4	-4	1.66276	1.64345	1.68124	1.64345	-0.0193052	0.0377886	-0.0377886	2	2	2	2	43	36	45	29	58	31	63	55	4	3
722550.80-2995010.01	2G-HH5753	2G-HH	2011	2012	2013	2014	5753	5753	CP	CA	Alive	Alive	Alive	Alive				0	0	0	0	17	20	20	21	3	0	1	1.25527	1.32222	1.32222	1.34242	0.0669468	0	0.0202034	2	2	2	2	40	21	43	17	39	47	43	35	4	0
722549.79-2995009.47	2G-HH5754	2G-HH	2011	2012	2013	2014	5754	5754	CP	CA	Alive	Alive	Alive	Alive				0	0	0	0	17	13	16	18	-4	3	2	1.25527	1.14613	1.23045	1.27875	-0.109144	0.0843209	0.0483047	2	2	2	2	19	38	39	22	32	43	42	37	0	0
722550.94-2995013.05	2G-HH5755	2G-HH	2011	2012	2013	2014	5755	5755	CP	CA	Alive	Alive	Alive	Alive				0	0	0	0	12	9	8	8	-3	-1	0	1.11394	1	0.954243	0.954243	-0.113943	-0.0457575	0	2	1	1	1	27	35	44	17	39	36	42	50	0	0
722550.83-2995013.21	2G-HH5756	2G-HH	2011	2012	2013	2014	5756	5756	CP	CA	Alive	Alive	Alive	Alive				0	0	0	0	20	11	13	15	-9	2	2	1.32222	1.07918	1.14613	1.20412	-0.243038	0.0669468	0.0579919	2	2	2	2	39	36	47	23	69	60	56	49	2	0
722550.09-2995011.56	2G-HH5757	2G-HH	2011	2012	2013	2014	5757	5757	CP	CA	Alive	Alive	Alive	Alive				0	0	0	0	40	35	33	40	-5	-2	7	1.61278	1.5563	1.53148	1.61278	-0.0564814	-0.0248236	0.0813049	2	2	2	2	43	30	37	22	45	52	49	40	3	3
722549.60-2995007.16	2G-HH5758	2G-HH	2011	2012	2013	2014	5758	5758	CP	CA	Alive	Alive	Alive	Alive				0	0	0	0	40	33	32	40	-7	-1	8	1.61278	1.53148	1.51851	1.61278	-0.0813049	-0.012965	0.0942699	2	2	2	2	19	34	55	28	50	42	42	45	2	0
722550.33-2995009.80	2G-HH5759	2G-HH	2011	2012	2013	2014	5759	5759	CP	CA	Alive	Alive	Alive	Dead				0	0	0	1	34	28	25		-6	-3		1.54407	1.4624	1.41497		-0.08167	-0.0474246		2	2	2		29	24	22		53	50	46		2	2
722550.36-2995005.28	2G-HH5760	2G-HH	2011	2012	2013	2014	5760	5760	CP	CA	Alive	Alive	Alive	Alive				0	0	0	0	61	61	62	62	0	1	0	1.79239	1.79239	1.79934	1.79934	0	0.00694886	0	2	2	2	2	45	29	43	27	50	43	49	48	5	4
722547.65-2995005.29	2G-HH5761	2G-HH	2011	2012	2013	2014	5761	5761	CP	CA	Alive	Alive	Alive	Alive				0	0	0	0	41	39	40	40	-2	1	0	1.62325	1.60206	1.61278	1.61278	-0.0211893	0.0107239	0	2	2	2	2	44	23	53	22	57	52	58	45	2	0
722547.17-2995009.22	2G-HH5762	2G-HH	2011	2012	2013	2014	5762	5762	CP	CA	Alive	Alive	Alive	Alive				0	0	0	0	62	54	57	60	-8	3	3	1.79934	1.74036	1.76343	1.78533	-0.0589779	0.0230653	0.0219018	2	2	2	2	60	47	55	32	49	59	63	50	8	5
722549.41-2995008.22	2G-HH5763	2G-HH	2011	2012	2013	2014	5763	5763	CP	CA	Alive	Alive	Alive	Alive				0	0	0	0	21	21	22	21	0	1	-1	1.34242	1.34242	1.36173	1.34242	0	0.0193052	-0.0193052	2	2	2	2	48	40	65	30	46	45	44	40	3	0
722550.41-2995014.00	2G-HH5764	2G-HH	2011	2012	2013	2014	5764	5764	CP	CA	Alive	Alive	Alive	Alive				0	0	0	0	60	55	55	48	-5	0	-7	1.78533	1.74819	1.74819	1.6902	-0.0371418	0	-0.0579919	2	2	2	2	39	30	44	26	58	58	60	45	4	5
722548.30-2995013.46	2G-HH5765	2G-HH	2011	2012	2013	2014	5765	5765	CP	CA	Alive	Alive	Alive	Alive				0	0	0	0	19	15	17	11	-4	2	-6	1.30103	1.20412	1.25527	1.07918	-0.09691	0.0511525	-0.176091	2	2	2	2	17	23	23	21	53	43	44	40	1	0
	2G-HH5766	2G-HH				2014	5766		CP	CA				Alive							0				30							1.49136							2				25				50
722547.12-2995014.10	2G-HH5767	2G-HH	2011	2012	2013	2014	5767	5767	CP	CA	Alive	Alive	Alive	Alive				0	0	0	0	23	17	17	20	-6	0	3	1.38021	1.25527	1.25527	1.32222	-0.124939	0	0.0669468	2	2	2	2	40	64	45	35	47	53	52	50	2	3
722546.97-2995014.45	2G-HH5767	2G-HH	2011	2012	2013	2014	5767	5767	CP	CA	Alive	Alive	Alive	Alive				0	0	0	0	40	34	34	34	-6	0	0	1.61278	1.54407	1.54407	1.54407	-0.0687158	0	0	2	2	2	2	55	34	63	35	57	52	52	50	2	2
722546.94-2995010.87	2G-HH5768	2G-HH	2011	2012	2013	2014	5768	5768	CP	CA	Alive	Alive	Alive	Alive				0	0	0	0	31	29	31	29	-2	2	-2	1.50515	1.47712	1.50515	1.47712	-0.0280287	0.0280287	-0.0280287	2	2	2	2	62	43	65	47	49	53	54	50	4	1
722549.24-2995007.09	2G-HH5769	2G-HH	2011	2012	2013	2014	5769	5769	CP	CA	Alive	Alive	Alive	Alive				0	0	0	0	30	23	25	30	-7	2	5	1.49136	1.38021	1.41497	1.49136	-0.11115	0.0347621	0.0763883	2	2	2	2	42	26	41	24	49	46	42	44	4	2
722547.88-2995008.97	2G-HH5770	2G-HH	2011	2012	2013	2014	5770	5770	CP	CA	Alive	Alive	Alive	Alive				0	0	0	0	30	25	27	30	-5	2	3	1.49136	1.41497	1.44716	1.49136	-0.0763883	0.0321847	0.0442037	2	2	2	2	46	38	51	33	49	44	47	45	4	3
722549.88-2995007.12	2G-HH5771	2G-HH	2011	2012	2013	2014	5771	5771	CP	CA	Alive	Alive	Alive	Alive				0	0	0	0	26	24	23	25	-2	-1	2	1.43136	1.39794	1.38021	1.41497	-0.0334238	-0.0177288	0.0347621	2	2	2	2	26	26	10	18	55	38	6	40	2	0
722550.71-2995009.83	2G-HH5772	2G-HH	2011	2012	2013	2014	5772	5772	CP	CA	Alive	Alive	Alive	Alive				0	0	0	0	25	22	27	25	-3	5	-2	1.41497	1.36173	1.44716	1.41497	-0.0532455	0.0854302	-0.0321847	2	2	2	2	45	37	45	27	58	65	57	54	4	2
722551.21-2995009.88	2G-HH5773	2G-HH	2011	2012	2013	2014	5773	5773	CP	CA	Alive	Alive	Alive	Alive				0	0	0	0	39	30	33	32	-9	3	-1	1.60206	1.49136	1.53148	1.51851	-0.110698	0.0401172	-0.012965	2	2	2	2	62	61	70	26	54	44	50	40	3	4
722547.68-2995009.00	2G-HH5774	2G-HH	2011	2012	2013	2014	5774	5774	CP	CA	Alive	Alive	Alive	Alive				0	0	0	0	19	11	19	18	-8	8	-1	1.30103	1.07918	1.30103	1.27875	-0.221849	0.221849	-0.0222764	2	2	2	2	37	24	53	18	40	44	42	37	4	0
722547.51-2995006.81	2G-HH5775	2G-HH	2011	2012	2013	2014	5775	5775	CP	CA	Alive	Alive	Alive	Alive				0	0	0	0	48	41	39	40	-7	-2	1	1.6902	1.62325	1.60206	1.61278	-0.0669468	-0.0211893	0.0107239	2	2	2	2	40	50	48	20	46	53	47	46	4	5
722547.63-2995009.75	2G-HH5776	2G-HH	2011	2012	2013	2014	5776	5776	CP	CA	Alive	Alive	Alive	Alive				0	0	0	0	104	106	101	110	2	-5	9	2.02119	2.02938	2.0086	2.04532	0.00819448	-0.0207836	0.0367228	3	3	3	3	49	40	47	36	54	47	50	48	12	7
722546.92-2995008.99	2G-HH5777	2G-HH	2011	2012	2013	2014	5777	5777	CP	CA	Alive	Alive	Alive	Alive				0	0	0	0	30	22	30	23	-8	8	-7	1.49136	1.36173	1.49136	1.38021	-0.129634	0.129634	-0.11115	2	2	2	2	47	35	46	28	49	42	41	40	2	0
722550.02-2995007.32	2G-HH5778	2G-HH	2011	2012	2013	2014	5778	5778	CP	CA	Alive	Alive	Alive	Alive				0	0	0	0	14	16	18	19	2	2	1	1.17609	1.23045	1.27875	1.30103	0.0543577	0.0483047	0.0222764	2	2	2	2	29	26	26	18	43	40	29	35	0	0
722545.94-2995012.76	2G-HH5779	2G-HH	2011	2012	2013	2014	5779	5779	CP	CA	Alive	Alive	Alive	Alive				0	0	0	0	20	22	23	20	2	1	-3	1.32222	1.36173	1.38021	1.32222	0.0395085	0.0184834	-0.0579919	2	2	2	2	62	61	56	37	52	52	48	46	0	4
722547.43-2995013.85	2G-HH5780	2G-HH	2011	2012	2013	2014	5780	5780	CP	CA	Alive	Alive	Alive	Alive				0	0	0	0	7	5	6	6.5	-2	1	0.5	0.90309	0.778151	0.845098	0.875061	-0.124939	0.0669468	0.0299632	1	1	1	1	10	12	7	9	20	33	42	32	0	0
722545.47-2995008.39	2G-HH5781	2G-HH	2011	2012	2013	2014	5781	5781	CP	CA	Alive	Alive	Alive	Alive				0	0	0	0	26	25	27	25	-1	2	-2	1.43136	1.41497	1.44716	1.41497	-0.0163904	0.0321847	-0.0321847	2	2	2	2	78	66	67	40	57	52	54	52	4	3
722543.69-2995011.87	2G-HH5783	2G-HH	2011	2012	2013	2014	5783	5783	CP	CA	Alive	Alive	Alive	Alive				0	0	0	0	20	20	22	20	0	2	-2	1.32222	1.32222	1.36173	1.32222	0	0.0395085	-0.0395085	2	2	2	2	30	15	21	27	41	40	31	95	0	0
722543.64-2995009.71	2G-HH5784	2G-HH	2011	2012	2013		5784	5784	CP	CA	Alive	Alive	Dead					0	0	1		36	30			-6			1.5682	1.49136			-0.07684			2	2			50	30			50	22			2
722543.53-2995013.81	2G-HH5785	2G-HH	2011	2012	2013	2014	5785	5785	CP	CA	Alive	Alive	Alive	Alive				0	0	0	0	20	26	28	25	6	2	-3	1.32222	1.43136	1.4624	1.41497	0.109144	0.0310342	-0.0474246	2	2	2	2	66	50	60	32	50	53	38	36	2	3
722544.64-2995020.74	2G-HH5786	2G-HH	2011	2012	2013	2014	5786	5786	CP	CA	Alive	Alive	Alive	Alive				0	0	0	0	97	90	94	100	-7	4	6	1.99123	1.95904	1.97772	2.00432	-0.0321847	0.0186822	0.0265978	2	2	2	3	43	31	40	30	56	55	55	55	4	5
722546.21-2995014.26	2G-HH5787	2G-HH	2011	2012	2013	2014	5787	5787	CP	CA	Alive	Alive	Alive	Dead				0	0	0	1	25	22	25		-3	3		1.41497	1.36173	1.41497		-0.0532455	0.0532455		2	2	2		23	13	28		48	55	45		1	0
722546.13-2995015.55	2G-HH5788	2G-HH	2011	2012	2013	2014	5788	5788	CP	CA	Alive	Alive	Alive	Alive				0	0	0	0	37	31	34	35	-6	3	1	1.57978	1.50515	1.54407	1.5563	-0.0746336	0.0389181	0.0122345	2	2	2	2	54	41	81	35	54	51	53	50	2	3
722543.95-2995014.15	2G-HH5789	2G-HH	2011	2012	2013	2014	5789	5789	CP	CA	Alive	Alive	Alive	Alive				0	0	0	0	22	17	22	20	-5	5	-2	1.36173	1.25527	1.36173	1.32222	-0.106455	0.106455	-0.0395085	2	2	2	2	30	41	50	18	47	51	50	40	0	0
722548.00-2995014.72	2G-HH5790	2G-HH	2011	2012	2013	2014	5790	5790	CP	CA	Alive	Alive	Alive	Alive				0	0	0	0	17	14	15	15	-3	1	0	1.25527	1.17609	1.20412	1.20412	-0.0791812	0.0280287	0	2	2	2	2	34	23	25	23	42	44	47	44	5	0
722548.03-2995015.65	2G-HH5791	2G-HH	2011	2012	2013	2014	5791	5791	CP	CA	Alive	Alive	Alive	Dead				0	0	0	1	22	14	16		-8	2		1.36173	1.17609	1.23045		-0.185637	0.0543577		2	2	2		34	33	45		54	56	45		1	0
722543.66-2995014.93	2G-HH5792	2G-HH	2011	2012	2013	2014	5792	5792	CP	CA	Alive	Alive	Alive	Alive				0	0	0	0	14	9	17	12	-5	8	-5	1.17609	1	1.25527	1.11394	-0.176091	0.255273	-0.141329	2	1	2	2	9	21	33	15	54	46	44	59	0	0
722544.06-2995013.51	2G-HH5793	2G-HH	2011	2012	2013	2014	5793	5793	CP	CA	Alive	Alive	Alive	Alive				0	0	0	0	23	19	19	20	-4	0	1	1.38021	1.30103	1.30103	1.32222	-0.0791812	0	0.0211893	2	2	2	2	60	38	58	38	48	50	46	45	3	0
722542.91-2995013.30	2G-HH5794	2G-HH	2011	2012	2013	2014	5794	5794	CP	CA	Alive	Alive	Alive	Alive				0	0	0	0	128	124	130	130	-4	6	0	2.11059	2.09691	2.11727	2.11727	-0.0136797	0.0203613	0	3	3	3	3	54	38	39	38	55	52	56	50	10	8
722542.87-2995014.12	2G-HH5795	2G-HH	2011	2012	2013	2014	5795	5795	CP	CA	Alive	Alive	Alive	Alive				0	0	0	0	106	99	112	116	-7	13	4	2.02938	2	2.05308	2.06819	-0.0293838	0.0530784	0.0151074	3	2	3	3	58	20	51	28	52	49	59	55	9	7
722541.86-2995015.23	2G-HH5796	2G-HH	2011	2012	2013	2014	5796	5796	CP	CA	Alive	Alive	Alive	Alive				0	0	0	0	110	104	106	100	-6	2	-6	2.04532	2.02119	2.02938	2.00432	-0.0241337	0.00819448	-0.0250624	3	3	3	3	45	32	53	34	53	48	52	52	6	8
722510.19-2994953.89	1G-UH5798	1G-UH	2011	2012	2013	2014	5798	5798	CP	SC	Alive	Alive	Alive	Alive				0	0	0	0	117	113	112	116	-4	-1	4	2.07188	2.0569	2.05308	2.06819	-0.0149772	-0.00382641	0.0151074	3	3	3	3	42	27	52	33	48	48	52	47	0	0
722510.53-2994953.89	1G-UH5800	1G-UH	2011	2012	2013	2014	5800	5800	CP	SC	Alive	Alive	Dead	Dead				0	0	1		133	125			-8			2.1271	2.10037			-0.0267343			3	3			30	13			43	30			0	0
722515.93-2994954.72	1G-UH5801	1G-UH	2011	2012	2013	2014	5801	5801	CP	SC	Alive	Alive	Alive	Alive				0	0	0	0	320	320	320	320	0	0	0	2.50651	2.50651	2.50651	2.50651	0	0	0	4	4	4	4	76	45	90	60	56	72	60	50	0	0
722497.98-2994961.03	1G-UH5802	1G-UH	2011	2012	2013	2014	5802	5802	CP	SC	Alive	Alive	Alive	Alive				0	0	0	0	165	169	167	172	4	-2	5	2.22011	2.23045	2.22531	2.23805	0.0103408	-0.00513964	0.0127368	3	3	3	3		38	38	45		52	56	53	0	0
722499.07-2994963.05	1G-UH5803	1G-UH	2011	2012	2013	2014	5803	5803	CP	SC	Alive	Alive	Alive	Alive				0	0	0	0	100	100	107	112	0	7	5	2.00432	2.00432	2.03342	2.05308	0	0.0291024	0.0196547	3	3	3	3		45	59	30		61	62	60	0	0
722496.39-2994949.50	1G-UH5804	1G-UH	2011	2012	2013	2014	5804	5804	CP	SC	Alive	Alive	Alive	Alive				0	0	0	0	174	176	181	181	2	5	0	2.24304	2.24797	2.26007	2.26007	0.00493522	0.0120981	0	3	3	3	3	48	34	70	45	56	65	64	70	0	0
722498.53-2994951.34	1G-UH5805	1G-UH	2011	2012	2013	2014	5805	5805	CP	SC	Alive	Alive	Alive	Alive				0	0	0	0	128	140	132	147	12	-8	15	2.11059	2.14922	2.12385	2.17026	0.0386294	-0.0253675	0.0464101	3	3	3	3	32	40	55	42	56	55	63	73	0	0
722497.96-2994950.76	1G-UH5806	1G-UH	2011	2012	2013	2014	5806	5806	CP	SC	Alive	Alive	Alive	Alive				0	0	0	0	234	230	232	236	-4	2	4	2.37107	2.36361	2.36736	2.37475	-0.00745588	0.00374394	0.00739242	3	3	3	3	50	40	50	49	54	60	52	62	0	0
722495.85-2994952.59	1G-UH5807	1G-UH	2011	2012	2013	2014	5807	5807	CP	SC	Alive	Alive	Alive	Dead				0	0	0	1	156	176	170		20	-6		2.1959	2.24797	2.233		0.0520736	-0.0149772		3	3	3		30	27			55	55			0	0
722492.81-2994953.45	1G-UH5808	1G-UH	2011	2012	2013	2014	5808	5808	CP	SC	Alive	Alive	Alive	Alive				0	0	0	0	196	196	200	208	0	4	8	2.29447	2.29447	2.3032	2.32015	0	0.00872983	0.0169502	3	3	3	3		49	55	45		70	57	59	0	0
722494.08-2994956.51	1G-UH5809	1G-UH	2011	2012	2013	2014	5809	5809	CP	SC	Alive	Alive	Alive	Alive				0	0	0	0	215	220	225	232	5	5	7	2.33445	2.34439	2.35411	2.36736	0.00993852	0.00971617	0.0132475	3	3	3	3	40	57	67	45	67	70	65	80	0	0
722494.03-2994955.30	1G-UH5810	1G-UH	2011	2012	2013	2014	5810	5810	CP	SC	Alive	Alive	Alive	Alive				0	0	0	0	100	100	100	104	0	0	4	2.00432	2.00432	2.00432	2.02119	0	0	0.0168679	3	3	3	3	31	23	41	35	57	56	58	56	0	0
722492.14-2994954.16	1G-UH5811	1G-UH	2011	2012	2013	2014	5811	5811	CP	SC	Alive	Alive	Alive	Alive				0	0	0	0	115	105	110	110	-10	5	0	2.06446	2.02531	2.04532	2.04532	-0.0391521	0.0200171	0	3	3	3	3	31	36	51	48	44	57	59	58	0	0
722489.38-2994961.57	1G-UH5812	1G-UH	2011	2012	2013	2014	5812	5812	CP	SC	Alive	Alive	Alive	Alive				0	0	0	0	130	137	138	137	7	1	-1	2.11727	2.13988	2.14301	2.13988	0.0226078	0.00313571	-0.00313571	3	3	3	3	41	38	78	36	56	65	68	62	0	0
722488.98-2994959.19	1G-UH5813	1G-UH	2011	2012	2013	2014	5813	5813	CP	SC	Alive	Alive	Alive	Alive				0	0	0	0	100	100	105	112	0	5	7	2.00432	2.00432	2.02531	2.05308	0	0.0209845	0.0277726	3	3	3	3	28	28	50	32	43	50	52	57	0	0
722489.79-2994956.21	1G-UH5814	1G-UH	2011	2012	2013	2014	5814	5814	CP	SC	Alive	Alive	Alive	Alive				0	0	0	0	284	287	282	290	3	-5	8	2.45484	2.45939	2.45179	2.46389	0.00454763	-0.00760605	0.0121066	4	4	4	4	50	75	70	74	66	65	60	60	0	0
722495.71-2994958.54	1G-UH5815	1G-UH	2011	2012	2013	2014	5815	5815	CP	SC	Alive	Alive	Alive	Alive				0	0	0	0	190	190	193	200	0	3	7	2.28103	2.28103	2.2878	2.3032	0	0.00676836	0.0153943	3	3	3	3	34	56	55	50	52	68	64	70	0	0
722502.83-2994961.71	1G-UH5816	1G-UH	2011	2012	2013	2014	5816	5816	CP	SC	Alive	Alive	Alive	Dead				0	0	0	1	15	24	23		9	-1		1.20412	1.39794	1.38021		0.19382	-0.0177288		2	2	2		24	37	50		41	46	43		0	0
722501.36-2994963.09	1G-UH5817	1G-UH	2011	2012	2013	2014	5817	5817	CP	SC	Alive	Alive	Alive	Alive				0	0	0	0	23	30	22	30	7	-8	8	1.38021	1.49136	1.36173	1.49136	0.11115	-0.129634	0.129634	2	2	2	2	40	33	61	25	41	43	52	43	0	0
722502.74-2994962.67	1G-UH5818	1G-UH		2012	2013		5818	5818	CP	SC		Alive	Unknown		1				0				0							0							1				5				32				0
722503.00-2994963.98	1G-UH5819	1G-UH	2011	2012	2013	2014	5819	5819	CP	SC	Alive	Alive	Alive	Alive				0	0	0	0	27	26	22	20	-1	-4	-2	1.44716	1.43136	1.36173	1.32222	-0.0157943	-0.0696359	-0.0395085	2	2	2	2	33	33	58	20	47	47	51	47	0	0
722503.21-2994965.25	1G-UH5820	1G-UH	2011	2012	2013	2014	5820	5820	CP	SC	Alive	Alive	Alive	Alive				0	0	0	0	14	15	11	13	1	-4	2	1.17609	1.20412	1.07918	1.14613	0.0280287	-0.124939	0.0669468	2	2	2	2	36	47	60	27	45	42	48	40	0	0
722502.71-2994963.47	1G-UH5821	1G-UH	2011	2012	2013	2014	5821	5821	CP	SC	Alive	Alive	Alive	Alive				0	0	0	0	567	567	570	595	0	3	25	2.75435	2.75435	2.75664	2.77525	0	0.00228777	0.0186102	4	4	4	4		75		60		50		67	0	0
722504.53-2994963.92	1G-UH5822	1G-UH	2011	2012	2013	2014	5822	5822	CP	SC	Alive	Alive	Unknown	Dead				0	0	1			0							0							1			7	10			20	34			0	0
722504.18-2994965.34	1G-UH5823	1G-UH	2011	2012	2013	2014	5823	5823	CP	SC	Alive	Alive	Alive	Alive				0	0	0	0	28	33	31	27	5	-2	-4	1.4624	1.53148	1.50515	1.44716	0.0690809	-0.0263289	-0.0579919	2	2	2	2	35	40	61	39	43	34	46	44	0	0
722503.84-2994964.79	1G-UH5824	1G-UH	2011	2012	2013	2014	5824	5824	CP	SC	Alive	Alive	Alive	Alive				0	0	0	0	112	110	109	117	-2	-1	8	2.05308	2.04532	2.04139	2.07188	-0.00775546	-0.00393029	0.0304893	3	3	3	3	32	27	36	26	50	44	59	48	0	0
722503.44-2994964.37	1G-UH5825	1G-UH	2011	2012	2013	2014	5825	5825	CP	SC	Alive	Alive	Alive	Alive				0	0	0	0	22	26	22	23	4	-4	1	1.36173	1.43136	1.36173	1.38021	0.0696359	-0.0696359	0.0184834	2	2	2	2	36	50	74	29	46	48	52	49	0	0
722502.97-2994965.17	1G-UH5826	1G-UH	2011	2012	2013	2014	5826	5826	CP	SC	Alive	Alive	Alive	Dead				0	0	0	1	15	20	15		5	-5		1.20412	1.32222	1.20412		0.118099	-0.118099		2	2	2		45	62	44			42	47		0	0
722500.91-2994964.40	1G-UH5827	1G-UH	2011	2012	2013	2014	5827	5827	CP	SC	Alive	Alive	Alive	Alive				0	0	0	0	35	38	34	34	3	-4	0	1.5563	1.59106	1.54407	1.54407	0.0347621	-0.0469966	0	2	2	2	2	34	35	60	35	46	41	44	44	0	0
722501.02-2994963.53	1G-UH5828	1G-UH	2011	2012	2013	2014	5828	5828	CP	SC	Alive	Alive	Alive	Alive				0	0	0	0	23	30	22	22	7	-8	0	1.38021	1.49136	1.36173	1.36173	0.11115	-0.129634	0	2	2	2	2	47	65	81	45	40	42	45	42	0	0
722500.23-2994965.27	1G-UH5829	1G-UH	2011	2012	2013	2014	5829	5829	CP	SC	Alive	Alive	Alive	Alive				0	0	0	0	19	20	19	18	1	-1	-1	1.30103	1.32222	1.30103	1.27875	0.0211893	-0.0211893	-0.0222764	2	2	2	2	34	41	60	30	46	48	45	40	0	0
722500.27-2994963.54	1G-UH5830	1G-UH	2011	2012	2013	2014	5830	5830	CP	SC	Alive	Alive	Alive	Alive				0	0	0	0	25	30	34	30	5	4	-4	1.41497	1.49136	1.54407	1.49136	0.0763883	0.0527064	-0.0527064	2	2	2	2	47	51	69	40	40	36	44	42	0	0
722501.45-2994968.42	1G-UH5831	1G-UH	2011	2012	2013	2014	5831	5831	CP	SC	Alive	Alive	Alive	Alive				0	0	0	0	10	12	10	6	2	-2	-4	1.04139	1.11394	1.04139	0.845098	0.0725507	-0.0725507	-0.196295	2	2	2	2	31	41	50	27	47	52	50	38	0	0
722501.53-2994968.18	1G-UH5832	1G-UH	2011	2012	2013	2014	5832	5832	CP	SC	Alive	Alive	Alive	Alive				0	0	0	0	18	19	19	15	1	0	-4	1.27875	1.30103	1.30103	1.20412	0.0222764	0	-0.09691	2	2	2	2	48	46	63	40	46	42	40	35	0	0
722501.19-2994968.20	1G-UH5833	1G-UH	2011	2012	2013	2014	5833	5833	CP	SC	Alive	Alive	Alive	Alive				0	0	0	0	19	26	21	21	7	-5	0	1.30103	1.43136	1.34242	1.34242	0.130334	-0.0889411	0	2	2	2	2	50	54	85	55	46	50	52	53	0	0
722501.26-2994966.07	1G-UH5834	1G-UH	2011	2012	2013	2014	5834	5834	CP	SC	Alive	Alive	Alive	Alive				0	0	0	0	89	90	87	89	1	-3	2	1.95424	1.95904	1.94448	1.95424	0.00479888	-0.0145587	0.00975984	2	2	2	2	22	20	32	27	43	43	43	37	0	0
722503.29-2994968.24	1G-UH5835	1G-UH	2011	2012	2013	2014	5835	5835	CP	SC	Alive	Alive	Alive	Dead				0	0	0	1	30	30	31		0	1		1.49136	1.49136	1.50515		0	0.0137883		2	2	2		35	38	60		40	40	40		0	0
722502.33-2994968.49	1G-UH5836	1G-UH	2011	2012	2013	2014	5836	5836	CP	SC	Alive	Alive	Alive	Alive				0	0	0	0	224	224	222	240	0	-2	18	2.35218	2.35218	2.3483	2.38202	0	-0.00387766	0.0337122	3	3	3	3	42	37	52	57	50	48	64	54	0	0
722502.52-2994967.24	1G-UH5837	1G-UH	2011	2012	2013	2014	5837	5837	CP	SC	Alive	Alive	Alive	Dead				0	0	0	1	19	21	26		2	5		1.30103	1.34242	1.43136		0.0413927	0.0889411		2	2	2		34	48	81		48	41	42		0	0
722505.22-2994966.82	1G-UH5838	1G-UH	2011	2012	2013	2014	5838	5838	CP	SC	Alive	Alive	Alive	Alive				0	0	0	0	68	69	68	72	1	-1	4	1.83885	1.8451	1.83885	1.86332	0.00624895	-0.00624895	0.0244738	2	2	2	2	25	36	42	25	44	46	53	45	0	0
722504.42-2994967.64	1G-UH5840	1G-UH	2011	2012	2013	2014	5840	5840	CP	SC	Alive	Alive	Alive	Alive				0	0	0	0	28	32	28	28	4	-4	0	1.4624	1.51851	1.4624	1.4624	0.0561159	-0.0561159	0	2	2	2	2	42	52	95	54	43	44	45	42	0
722504.27-2994970.00	1G-UH5841	1G-UH	2011	2012	2013	2014	5841	5841	CP	SC	Alive	Alive	Alive	Alive				0	0	0	0	75	75	74	71	0	-1	-3	1.88081	1.88081	1.87506	1.85733	0	-0.00575233	-0.0177288	2	2	2	2	23	29	41	27	40	42	45	41	0	0
722504.87-2994971.09	1G-UH5843	1G-UH	2011	2012	2013	2014	5843	5843	CP	SC	Alive	Alive	Alive	Alive				0	0	0	0	28	32	30	30	4	-2	0	1.4624	1.51851	1.49136	1.49136	0.0561159	-0.0271522	0	2	2	2	2	37	39	71	41	41	47	53	47	0	0
722506.91-2994971.35	1G-UH5844	1G-UH	2011	2012	2013	2014	5844	5844	CP	SC	Alive	Alive	Alive	Alive				0	0	0	0	135	140	157	165	5	17	8	2.13354	2.14922	2.19866	2.22011	0.0156802	0.049438	0.021451	3	3	3	3	40	41	59	46	50	57	66	65	0	0
722505.78-2994970.30	1G-UH5845	1G-UH	2011	2012	2013	2014	5845	5845	CP	SC	Alive	Alive	Alive	Alive				0	0	0	0	123	120	127	120	-3	7	-7	2.09342	2.08279	2.10721	2.08279	-0.0106363	0.0244246	-0.0244246	3	3	3	3	30	36	38	32	42	44	50	47	0	0
722506.30-2994970.51	1G-UH5846	1G-UH	2011	2012	2013	2014	5846	5846	CP	SC	Alive	Alive	Alive	Alive				0	0	0	0	29	33	30	30	4	-3	0	1.47712	1.53148	1.49136	1.49136	0.0543577	-0.0401172	0	2	2	2	2	30	56	69	56	51	53	44	51	0	0
722507.28-2994967.99	1G-UH5847	1G-UH	2011	2012	2013	2014	5847	5847	CP	SC	Alive	Alive	Alive	Alive				0	0	0	0	5	15	14	10	10	-1	-4	0.778151	1.20412	1.17609	1.04139	0.425969	-0.0280287	-0.134699	1	2	2	2	39	52	70	67	56	61	63	59	0	0
722507.00-2994967.64	1G-UH5848	1G-UH	2011	2012	2013	2014	5848	5848	CP	SC	Alive	Alive	Alive	Alive				0	0	0	0	34	36	40	43	2	4	3	1.54407	1.5682	1.61278	1.64345	0.0241337	0.0445821	0.0306688	2	2	2	2	33	38	52	33	43	53	50	52	0	0
722507.12-2994969.29	1G-UH5849	1G-UH	2011	2012	2013	2014	5849	5849	CP	SC	Alive	Alive	Alive	Alive				0	0	0	0	7	10	9	13	3	-1	4	0.90309	1.04139	1	1.14613	0.138303	-0.0413927	0.146128	1	2	1	2	30	46	64	25	40	43	40	36	0	0
722508.54-2994971.23	1G-UH5850	1G-UH	2011	2012	2013	2014	5850	5850	CP	SC	Alive	Alive	Alive	Alive				0	0	0	0	117	120	123	128	3	3	5	2.07188	2.08279	2.09342	2.11059	0.0109034	0.0106363	0.017168	3	3	3	3	34	40	45	37	45	50	55	59	0	0
722508.00-2994968.65	1G-UH5851	1G-UH	2011	2012	2013	2014	5851	5851	CP	SC	Alive	Alive	Alive	Alive				0	0	0	0	28	30	33	34	2	3	1	1.4624	1.49136	1.53148	1.54407	0.0289637	0.0401172	0.0125891	2	2	2	2	63	80	80	70	50	50	53	45	0
722508.55-2994968.69	1G-UH5852	1G-UH	2011	2012	2013	2014	5852	5852	CP	SC	Alive	Alive	Alive	Alive				0	0	0	0	23	23	21	23	0	-2	2	1.38021	1.38021	1.34242	1.38021	0	-0.0377886	0.0377886	2	2	2	2	56	45	80	45	42	50	58	50	0	0
722507.32-2994967.21	1G-UH5853	1G-UH	2011	2012	2013	2014	5853	5853	CP	SC	Alive	Alive	Alive	Alive				0	0	0	0		22	18	21		-4	3		1.36173	1.27875	1.34242		-0.0829742	0.0636691		2	2	2		46	60	43		37	40	39	0	0
722506.05-2994967.55	1G-UH5854	1G-UH		2012	2013	2014	5854	5854	CP	SC		Alive	Alive	Alive					0	0	0		127	126	129		-1	3		2.10721	2.1038	2.11394		-0.00340625	0.0101396		3	3	3		23	37	30		40	45	46		0
722508.86-2994966.80	1G-UH5856	1G-UH	2011	2012	2013	2014	5856	5856	CP	SC	Alive	Alive	Alive	Dead				0	0	0	1	25	24	21		-1	-3		1.41497	1.39794	1.34242		-0.0170333	-0.0555173		2	2	2		40	45	38		48	46	29		0	0
722510.19-2994965.09	1G-UH5857	1G-UH	2011	2012	2013	2014	5857	5857	CP	SC	Alive	Alive	Alive	Alive				0	0	0	0	36	36	34	39	0	-2	5	1.5682	1.5682	1.54407	1.60206	0	-0.0241337	0.0579919	2	2	2	2	42	47	62	36	50	55	60	49	0	0
722510.33-2994964.11	1G-UH5858	1G-UH	2011	2012	2013	2014	5858	5858	CP	SC	Alive	Alive	Exclude	Alive				0	0		0	24	25	23	24	1	-2	1	1.39794	1.41497	1.38021	1.39794	0.0170333	-0.0347621	0.0177288	2	2	2	2	60	35	46	38	50	54	48	54	0	0
722510.33-2994964.11	1G-UH5858	1G-UH	2011	2012	2013	2014	5858	5858	CP	SC	Alive	Alive	Alive	Alive				0	0	0	0	24	25	27	24	1	2	-3	1.39794	1.41497	1.44716	1.39794	0.0170333	0.0321847	-0.049218	2	2	2	2	60	35	48	38	50	54	51	54	0	0
722510.86-2994965.61	1G-UH5859	1G-UH	2011	2012	2013	2014	5859	5859	CP	SC	Alive	Alive	Alive	Alive				0	0	0	0	37	42	43	42	5	1	-1	1.57978	1.63347	1.64345	1.63347	0.0536849	0.00998422	-0.00998422	2	2	2	2	36	51	43	35	49	48	60	50	0	0
722511.12-2994964.78	1G-UH5860	1G-UH	2011	2012	2013	2014	5860	5860	CP	SC	Alive	Alive	Alive	Alive				0	0	0	0	40	48	45	52	8	-3	7	1.61278	1.6902	1.66276	1.72428	0.0774122	-0.0274382	0.061518	2	2	2	2	50	42	33	50	62	46	50	56	0	0
722511.38-2994964.83	1G-UH5861	1G-UH	2011	2012	2013	2014	5861	5861	CP	SC	Alive	Alive	Alive	Alive				0	0	0	0	19	20	20	21	1	0	1	1.30103	1.32222	1.32222	1.34242	0.0211893	0	0.0202034	2	2	2	2	58	54	60	33	48	45	50	45	0	0
722512.11-2994965.52	1G-UH5862	1G-UH	2011	2012	2013	2014	5862	5862	CP	SC	Alive	Alive	Exclude	Alive				0	0		0	15	16	15	16	1	-1	1	1.20412	1.23045	1.20412	1.23045	0.0263289	-0.0263289	0.0263289	2	2	2	2	49	39	60	62	46	49	43	54	0	0
722512.11-2994965.52	1G-UH5862	1G-UH	2011	2012	2013	2014	5862	5862	CP	SC	Alive	Alive	Alive	Alive				0	0	0	0	15	16	16	16	1	0	0	1.20412	1.23045	1.23045	1.23045	0.0263289	0	0	2	2	2	2	49	39	56	62	46	49	47	54	0	0
722511.81-2994963.69	1G-UH5863	1G-UH	2011	2012	2013	2014	5863	5863	CP	SC	Alive	Alive	Exclude	Alive				0	0		0	33	32	32	34	-1	0	2	1.53148	1.51851	1.51851	1.54407	-0.012965	0	0.0255541	2	2	2	2	64	50	87	61	54	50	63	57	0	0
722511.81-2994963.69	1G-UH5863	1G-UH	2011	2012	2013	2014	5863	5863	CP	SC	Alive	Alive	Alive	Alive				0	0	0	0	33	32	30	34	-1	-2	4	1.53148	1.51851	1.49136	1.54407	-0.012965	-0.0271522	0.0527064	2	2	2	2	64	50	83	61	54	50	60	57	0	0
722516.30-2994962.35	1G-UH5864	1G-UH	2011	2012	2013	2014	5864	5864	CP	SC	Alive	Alive	Alive	Alive				0	0	0	0	16	20	17	20	4	-3	3	1.23045	1.32222	1.25527	1.32222	0.0917704	-0.0669468	0.0669468	2	2	2	2	65	49	74	44	50	50	56	48	0	0
722515.80-2994963.35	1G-UH5865	1G-UH	2011	2012	2013	2014	5865	5865	CP	SC	Alive	Alive	Alive	Alive				0	0	0	0	8	12	13	13	4	1	0	0.954243	1.11394	1.14613	1.14613	0.159701	0.0321847	0	1	2	2	2	37	36	56	50	48	47	43	50	0	0
722518.20-2994952.00	1G-UH5868	1G-UH	2011	2012	2013	2014	5868	5868	CP	SC	Alive	Alive	Alive	Alive				0	0	0	0	260	257	255	260	-3	-2	5	2.41664	2.41162	2.40824	2.41664	-0.0050208	-0.00337974	0.00840054	4	4	4	4	40	33	60	45	58	56	62	60	0	0
722522.64-2994953.96	1G-UH5871	1G-UH		2012	2013	2014	5871	5871	CP	SC		Alive	Unknown	NSE	1				0	1			0							0							1				5				7				0
722522.31-2994953.38	1G-UH5872	1G-UH		2012	2013	2014	5872	5872	CP	SC		Alive	Unknown	NSE	1				0	1			0							0							1				4				10				0
722522.55-2994953.51	1G-UH5873	1G-UH		2012	2013	2014	5873	5873	CP	SC		Alive	Unknown	NSE	1				0	1			0							0							1				5				3				0
722524.69-2994955.46	1G-UH5874	1G-UH		2012	2013	2014	5874	5874	CP	SC		Alive	Unknown	NSE	1				0	1			3							0.60206							1				12				39				0
722527.46-2994958.09	1G-UH5875	1G-UH	2011	2012	2013	2014	5875	5875	CP	SC	Alive	Alive	Alive	Alive				0	0	0	0	25	20	20	20	-5	0	0	1.41497	1.32222	1.32222	1.32222	-0.0927541	0	0	2	2	2	2	80	75	68	66	65	70	69	72	0	0
722524.62-2994958.23	1G-UH5876	1G-UH	2011	2012	2013	2014	5876	5876	CP	SC	Alive	Alive	Alive	Alive				0	0	0	0	91	82	85	90	-9	3	5	1.96379	1.91908	1.9345	1.95904	-0.0447097	0.0154204	0.0245429	2	2	2	2	33	41	49	32	50	52	56	50	0	0
722525.41-2994959.27	1G-UH5877	1G-UH	2011	2012	2013	2014	5877	5877	CP	SC	Alive	Alive	Alive	Alive				0	0	0	0	21	20	19	22	-1	-1	3	1.34242	1.32222	1.30103	1.36173	-0.0202034	-0.0211893	0.0606978	2	2	2	2	51	57	76	43	62	55	58	54	0	0
722525.00-2994959.64	1G-UH5878	1G-UH	2011	2012	2013	2014	5878	5878	CP	SC	Alive	Alive	Alive	Alive				0	0	0	0	26	27	23	30	1	-4	7	1.43136	1.44716	1.38021	1.49136	0.0157943	-0.0669468	0.11115	2	2	2	2	57	72	75	35	56	49	55	55	0	0
722526.02-2994959.69	1G-UH5879	1G-UH	2011	2012	2013	2014	5879	5879	CP	SC	Alive	Alive	Alive	Alive				0	0	0	0	36	40	38	50	4	-2	12	1.5682	1.61278	1.59106	1.70757	0.0445821	-0.0217192	0.116506	2	2	2	2	49	55	53	40	50	50	62	53	0	0
722527.65-2994956.08	1G-UH5880	1G-UH	2011	2012	2013	2014	5880	5880	CP	SC	Alive	Alive	Alive	Alive				0	0	0	0	6	3	2	5	-3	-1	3	0.845098	0.60206	0.477121	0.778151	-0.243038	-0.124939	0.30103	1	1	1	1	42	35	31	34	43	37	20	43	0	0
722525.98-2994956.73	1G-UH5881	1G-UH	2011	2012	2013	2014	5881	5881	CP	SC	Alive	Alive	Alive	Alive				0	0	0	0	12	13	8	16	1	-5	8	1.11394	1.14613	0.954243	1.23045	0.0321847	-0.191886	0.276206	2	2	2	2	85	80	95	96	58	66	63	60	0	0
722524.45-2994956.98	1G-UH5882	1G-UH	2011	2012	2013	2014	5882	5882	CP	SC	Alive	Alive	Alive	Alive				0	0	0	0	137	133	131	146	-4	-2	15	2.13988	2.1271	2.12057	2.16732	-0.0127743	-0.00653087	0.0467434	3	3	3	3	41	56	49	47	60	61	60	67	0	0
722523.35-2994956.14	1G-UH5883	1G-UH	2011	2012	2013	2014	5883	5883	CP	SC	Alive	Alive	Alive	Alive				0	0	0	0	38	36	32	32	-2	-4	0	1.59106	1.5682	1.51851	1.51851	-0.0228629	-0.0496878	0	2	2	2	2	35	33	43	30	58	59	71	52	0	0
722523.14-2994956.52	1G-UH5884	1G-UH	2011	2012	2013	2014	5884	5884	CP	SC	Alive	Alive	Alive	Alive				0	0	0	0	14	15	12	20	1	-3	8	1.17609	1.20412	1.11394	1.32222	0.0280287	-0.0901766	0.208276	2	2	2	2	45	58	42	52	54	55	63	62	0	0
722523.32-2994956.94	1G-UH5885	1G-UH	2011	2012	2013	2014	5885	5885	CP	SC	Alive	Alive	Dead	Dead				0	0	1		101	100			-1			2.0086	2.00432			-0.0042788			3	3			20	11			43	27			0	0
722523.33-2994957.85	1G-UH5886	1G-UH	2011	2012	2013	2014	5886	5886	CP	SC	Alive	Alive	Alive	Alive				0	0	0	0	23	28	18	22	5	-10	4	1.38021	1.4624	1.27875	1.36173	0.0821868	-0.183644	0.0829742	2	2	2	2	39	50	51	32	39	43	43	40	0	0
722522.72-2994957.77	1G-UH5887	1G-UH	2011	2012	2013	2014	5887	5887	CP	SC	Alive	Alive	Alive	Alive				0	0	0	0	190	185	176	200	-5	-9	24	2.28103	2.26951	2.24797	2.3032	-0.0115204	-0.0215397	0.0552228	3	3	3	3	55	48	57	50	58	60	56	67	0	0
722520.49-2994958.33	1G-UH5888	1G-UH		2012	2013	2014	5888	5888	CP	SC		Alive	Alive	Alive					0	0	0		25	18	20		-7	2		1.41497	1.27875	1.32222		-0.13622	0.0434657		2	2	2		41	70	40		51	60	51		0
722521.08-2994957.06	1G-UH5889	1G-UH	2011	2012	2013	2014	5889	5889	CP	SC	Alive	Alive	Alive	Alive				0	0	0	0	183	184	184	192	1	0	8	2.26482	2.26717	2.26717	2.28556	0.00235391	0	0.0183856	3	3	3	3	50	39	64	53	53	65	57	64	0	0
722520.71-2994956.41	1G-UH5890	1G-UH	2011	2012	2013	2014	5890	5890	CP	SC	Alive	Alive	Alive	Alive				0	0	0	0	159	160	163	172	1	3	9	2.20412	2.20683	2.21484	2.23805	0.00270589	0.00801797	0.0232023	3	3	3	3	51	48	70	60	56	58	62	70	0	0
722518.65-2994955.81	1G-UH5891	1G-UH	2011	2012	2013	2014	5891	5891	CP	SC	Alive	Alive	Alive	Alive				0	0	0	0	30	28	28	33	-2	0	5	1.49136	1.4624	1.4624	1.53148	-0.0289637	0	0.0690809	2	2	2	2	53	60	76	50	54	52	54	48	0	0
722519.18-2994955.90	1G-UH5892	1G-UH	2011	2012	2013	2014	5892	5892	CP	SC	Alive	Alive	Alive	Alive				0	0	0	0	143	137	133	145	-6	-4	12	2.15836	2.13988	2.1271	2.16435	-0.0184834	-0.0127743	0.0372481	3	3	3	3	42	35	52	40	59	55	62	60	0	0
722517.15-2994955.60	1G-UH5893	1G-UH	2011	2012	2013	2014	5893	5893	CP	SC	Alive	Alive	Alive	Alive				0	0	0	0	153	160	150	170	7	-10	20	2.18752	2.20683	2.17898	2.233	0.0193052	-0.0278489	0.0540192	3	3	3	3	50	56	73	70	53	57	61	65	0	0
722515.69-2994956.85	1G-UH5894	1G-UH	2011	2012	2013	2014	5894	5894	CP	SC	Alive	Alive	Alive	Alive				0	0	0	0	60	62	59	66	2	-3	7	1.78533	1.79934	1.77815	1.82607	0.0140107	-0.0211893	0.0479236	2	2	2	2	55	48	69	33	58	67	67	60	0
722518.31-2994962.59	1G-UH5896	1G-UH	2011	2012	2013	2014	5896	5896	CP	SC	Alive	Alive	Alive	Alive				0	0	0	0	41	50	50	58	9	0	8	1.62325	1.70757	1.70757	1.77085	0.0843209	0	0.0632818	2	2	2	2	47	59	52	34	49	49	55	48	0	0
722518.59-2994963.34	1G-UH5897	1G-UH	2011	2012	2013	2014	5897	5897	CP	SC	Alive	Alive	Alive	Alive				0	0	0	0	39	30	33	34	-9	3	1	1.60206	1.49136	1.53148	1.54407	-0.110698	0.0401172	0.0125891	2	2	2	2	53	53	48	30	54	56	64	50	0	0
722515.39-2994962.92	1G-UH5898	1G-UH	2011	2012	2013	2014	5898	5898	CP	SC	Alive	Alive	Alive	Alive				0	0	0	0	77	80	74	84	3	-6	10	1.89209	1.90849	1.87506	1.92942	0.0163904	-0.0334238	0.0543577	2	2	2	2	46	51	40	37	52	60	60	55	0	0
722516.25-2994964.22	1G-UH5899	1G-UH	2011	2012	2013	2014	5899	5899	CP	SC	Alive	Alive	Alive	Alive				0	0	0	0	16	17	15	26	1	-2	11	1.23045	1.25527	1.20412	1.43136	0.0248236	-0.0511525	0.227244	2	2	2	2	55	44	61	60	46	41	41	47	0	0
722516.25-2994963.67	1G-UH5900	1G-UH	2011	2012	2013	2014	5900	5900	CP	SC	Alive	Alive	Alive	Alive				0	0	0	0	25	25	24	28	0	-1	4	1.41497	1.41497	1.39794	1.4624	0	-0.0170333	0.064458	2	2	2	2	41	38	23	29	49	43	40	44	0
722400.32-2994686.37	4UG-HH5901	4UG-HH	2011	2012	2013		5901	5901	SP	CA	Alive	Alive	Alive					0	0	0		10	5	6		-5	1		1.04139	0.778151	0.845098		-0.263241	0.0669468		2	1	1		15	47	72		50	53	57		0	0
722396.10-2994686.18	4UG-HH5902	4UG-HH	2011	2012	2013	2014	5902	5902	SP	CA	Alive	Alive	Alive	Alive				0	0	0	0	20	25	27	36	5	2	9	1.32222	1.41497	1.44716	1.5682	0.0927541	0.0321847	0.121044	2	2	2	2	30	15	57	51	40	44	48	49	2	0
722396.92-2994687.99	4UG-HH5903	4UG-HH		2012	2013	2014	5903	5903	SP	CA		Alive	Alive	Alive					0	0	0		28	24	35		-4	11		1.4624	1.39794	1.5563		-0.064458	0.158362		2	2	2		48	70	68		46	62	68		0
722394.76-2994687.60	4UG-HH5904	4UG-HH	2011	2012	2013	2014	5904	5904	SP	CA	Alive	Alive	Alive	Alive				0	0	0	0	20	15	21	26	-5	6	5	1.32222	1.20412	1.34242	1.43136	-0.118099	0.138303	0.0889411	2	2	2	2	23	42	68	67	50	49	51	49	0	0
722396.56-2994687.79	4UG-HH5905	4UG-HH	2011	2012	2013	2014	5905	5905	SP	CA	Alive	Alive	Alive	Alive				0	0	0	0	16	23	13	17	7	-10	4	1.23045	1.38021	1.14613	1.25527	0.149762	-0.234083	0.109144	2	2	2	2	15	16	16	36	33	40	10	50	0	0
722398.03-2994689.97	4UG-HH5906	4UG-HH	2011	2012	2013	2014	5906	5906	SP	CA	Alive	Alive	Alive	Alive				0	0	0	0	30	30	30	31	0	0	1	1.49136	1.49136	1.49136	1.50515	0	0	0.0137883	2	2	2	2	33	22	57	53	49	45	52	51	0	0
722394.70-2994688.69	4UG-HH5907	4UG-HH	2011	2012	2013	2014	5907	5907	SP	CA	Alive	Alive	Alive	Alive				0	0	0	0	24	20	25	27	-4	5	2	1.39794	1.32222	1.41497	1.44716	-0.0757207	0.0927541	0.0321847	2	2	2	2	35	44	72	62	50	53	60	60	3	0
722393.89-2994687.48	4UG-HH5908	4UG-HH	2011	2012	2013	2014	5908	5908	SP	CA	Alive	Alive	Alive	Alive				0	0	0	0	37	28	33	38	-9	5	5	1.57978	1.4624	1.53148	1.59106	-0.117386	0.0690809	0.0595857	2	2	2	2	33	39	76	59	47	50	58	56	1	0
722393.59-2994685.16	4UG-HH5909	4UG-HH	2011	2012	2013	2014	5909	5909	SP	CA	Alive	Alive	Alive	Alive				0	0	0	0	70	70	66	77	0	-4	11	1.85126	1.85126	1.82607	1.89209	0	-0.0251835	0.0660198	2	2	2	2	42	38	54	45	47	40	55	53	3
722393.04-2994687.43	4UG-HH5910	4UG-HH	2011	2012	2013	2014	5910	5910	SP	CA	Alive	Alive	Alive	Alive				0	0	0	0	40	45	43	53	5	-2	10	1.61278	1.66276	1.64345	1.73239	0.049974	-0.0193052	0.0889411	2	2	2	2	49	25	83	43	49	55	56	59	3	0
722394.65-2994667.38	4UG-HH5911	4UG-HH	2011	2012	2013	2014	5911	5911	SP	CA	Alive	Alive	Alive	Alive				0	0	0	0	270	275	268	275	5	-7	7	2.43297	2.44091	2.42975	2.44091	0.00793979	-0.0111568	0.0111568	4	4	4	4	65	40	37	27	67	63	64	60	20	12
722393.26-2994682.24	4UG-HH5912	4UG-HH	2011	2012	2013	2014	5912	5912	SP	CA	Alive	Alive	Alive	Alive				0	0	0	0	30	23	25	31	-7	2	6	1.49136	1.38021	1.41497	1.50515	-0.11115	0.0347621	0.0901766	2	2	2	2	35	25	52	34	55	45	33	45	2	0
722397.42-2994682.22	4UG-HH5913	4UG-HH	2011	2012	2013	2014	5913	5913	SP	CA	Alive	Alive	Alive	Alive				0	0	0	0	47	45	49	45	-2	4	-4	1.68124	1.66276	1.69897	1.66276	-0.0184834	0.0362122	-0.0362122	2	2	2	2	42	23	80	65	56	55	61	67	1	0
722395.57-2994678.66	4UG-HH5914	4UG-HH	2011	2012	2013	2014	5914	5914	SP	CA	Alive	Alive	Alive	Alive				0	0	0	0	32	29	26	34	-3	-3	8	1.51851	1.47712	1.43136	1.54407	-0.0413927	-0.0457575	0.112704	2	2	2	2	32	24	46	45	50	46	50	57	5	6
722394.12-2994682.98	4UG-HH5915	4UG-HH	2011	2012	2013	2014	5915	5915	SP	CA	Alive	Alive	Alive	Alive				0	0	0	0	425	428	425	435	3	-3	10	2.62941	2.63246	2.62941	2.63949	0.00304769	-0.00304769	0.0100769	4	4	4	4	43	48	50	65	58	59	66	70	25	17
722392.64-2994680.82	4UG-HH5916	4UG-HH	2011	2012	2013	2014	5916	5916	SP	CA	Alive	Alive	Alive	Alive				0	0	0	0	95	90	86	87	-5	-4	1	1.98227	1.95904	1.93952	1.94448	-0.0232298	-0.0195221	0.00496342	2	2	2	2	39	35	42	46	56	46	60	58	6	6
722391.26-2994687.83	4UG-HH5917	4UG-HH	2011	2012	2013	2014	5917	5917	SP	CA	Alive	Alive	Alive	Alive				0	0	0	0	27	18	24	25	-9	6	1	1.44716	1.27875	1.39794	1.41497	-0.168404	0.119186	0.0170333	2	2	2	2	33	9		33	43	37		42	2	0
722392.81-2994684.08	4UG-HH5918	4UG-HH	2011	2012	2013	2014	5918	5918	SP	CA	Alive	Alive	Alive	Alive				0	0	0	0	42	33	40	44	-9	7	4	1.63347	1.53148	1.61278	1.65321	-0.10199	0.0813049	0.0404287	2	2	2	2	30	35	60	40	55	53	57	56	2	5
722390.12-2994687.11	4UG-HH5919	4UG-HH	2011	2012	2013	2014	5919	5919	SP	CA	Alive	Alive	Alive	Alive				0	0	0	0	50	48	53	51	-2	5	-2	1.70757	1.6902	1.73239	1.716	-0.0173741	0.0421977	-0.0163904	2	2	2	2	45	35	78	44	60	57	70	65	3	6
722399.21-2994681.57	4UG-HH5920	4UG-HH	2011	2012	2013	2014	5920	5920	SP	CA	Alive	Alive	Alive	Alive				0	0	0	0	30	22	23	24	-8	1	1	1.49136	1.36173	1.38021	1.39794	-0.129634	0.0184834	0.0177288	2	2	2	2	25	45	24	59	47	52	15	48	0	0
722390.49-2994686.94	4UG-HH5921	4UG-HH	2011	2012	2013	2014	5921	5921	SP	CA	Alive	Alive	Alive	Alive				0	0	0	0	70	66	64	64	-4	-2	0	1.85126	1.82607	1.81291	1.81291	-0.0251835	-0.0131614	0	2	2	2	2	34	17	39	32	53	59	55	57	4	6
722390.02-2994684.29	4UG-HH5922	4UG-HH	2011	2012	2013	2014	5922	5922	SP	CA	Alive	Alive	Alive	Alive				0	0	0	0	28	23	30	30	-5	7	0	1.4624	1.38021	1.49136	1.49136	-0.0821868	0.11115	0	2	2	2	2	39	9	62	51	43	40	43	42	2	0
722388.76-2994686.45	4UG-HH5923	4UG-HH	2011	2012	2013	2014	5923	5923	SP	CA	Alive	Alive	Alive	Alive				0	0	0	0	16	13	18	17	-3	5	-1	1.23045	1.14613	1.27875	1.25527	-0.0843209	0.132626	-0.0234811	2	2	2	2	21	23	40	34	40	39	42	40	0	0
722391.35-2994688.40	4UG-HH5924	4UG-HH	2011	2012	2013	2014	5924	5924	SP	CA	Alive	Alive	Alive	Alive				0	0	0	0	39	35	44	42	-4	9	-2	1.60206	1.5563	1.65321	1.63347	-0.0457575	0.09691	-0.0197441	2	2	2	2	33	16	50	39	49	55	59	57	4	6
722389.49-2994690.20	4UG-HH5925	4UG-HH	2011	2012	2013	2014	5925	5925	SP	CA	Alive	Alive	Alive	Alive				0	0	0	0	15	14	20	17	-1	6	-3	1.20412	1.17609	1.32222	1.25527	-0.0280287	0.146128	-0.0669468	2	2	2	2	41	34	78	63	48	50	50	58	0	0
722388.60-2994690.75	4UG-HH5926	4UG-HH	2011	2012	2013	2014	5926	5926	SP	CA	Alive	Alive	Alive	Alive				0	0	0	0	15	17	24	25	2	7	1	1.20412	1.25527	1.39794	1.41497	0.0511525	0.142668	0.0170333	2	2	2	2	32	47	82	64	41	40	55	45	0	0
722387.51-2994688.14	4UG-HH5927	4UG-HH	2011	2012	2013	2014	5927	5927	SP	CA	Alive	Alive	Alive	Alive				0	0	0	0	510	502	504	512	-8	2	8	2.70842	2.70157	2.70329	2.71012	-0.00685292	0.00172339	0.00682599	4	4	4	4	80	59	71	80	71	79	77	70	11	21
722385.73-2994686.25	4UG-HH5928	4UG-HH	2011	2012	2013	2014	5928	5928	SP	CA	Alive	Alive	Alive	Alive				0	0	0	0	124	117	133	125	-7	16	-8	2.09691	2.07188	2.1271	2.10037	-0.025028	0.0552228	-0.0267343	3	3	3	3	35	27	37	44	65	73	63	68	4	7
722380.36-2994684.63	4UG-HH5929	4UG-HH	2011	2012	2013	2014	5929	5929	SP	CA	Alive	Alive	Alive	Alive				0	0	0	0	99	100	105	102	1	5	-3	2	2.00432	2.02531	2.01284	0.00432137	0.0209845	-0.0124686	2	3	3	3	23	20	44	29	38	38	53	47	0
722382.15-2994689.19	4UG-HH5930	4UG-HH	2011	2012	2013	2014	5930	5930	SP	CA	Alive	Alive	Alive	Alive				0	0	0	0	26	24	31	28	-2	7	-3	1.43136	1.39794	1.50515	1.4624	-0.0334238	0.10721	-0.042752	2	2	2	2	34	37	72	46	38	47	60	50	0	0
722382.65-2994686.25	4UG-HH5931	4UG-HH	2011	2012	2013	2014	5931	5931	SP	CA	Alive	Alive	Alive	Alive				0	0	0	0	21	19	24	21	-2	5	-3	1.34242	1.30103	1.39794	1.34242	-0.0413927	0.09691	-0.0555173	2	2	2	2	21	21	42	35	54	55	53	50	0	0
722386.72-2994683.90	4UG-HH5932	4UG-HH	2011	2012	2013	2014	5932	5932	SP	CA	Alive	Alive	Alive	Alive				0	0	0	0	21	20	21	25	-1	1	4	1.34242	1.32222	1.34242	1.41497	-0.0202034	0.0202034	0.0725507	2	2	2	2	29	32	55	46	41	46	44	43	0	0
722386.01-2994682.38	4UG-HH5933	4UG-HH	2011	2012	2013	2014	5933	5933	SP	CA	Alive	Alive	Alive	Alive				0	0	0	0	19	15	17	20	-4	2	3	1.30103	1.20412	1.25527	1.32222	-0.09691	0.0511525	0.0669468	2	2	2	2	30	28	55	46	37	52	59	59	2	0
722387.73-2994681.53	4UG-HH5934	4UG-HH	2011	2012	2013	2014	5934	5934	SP	CA	Alive	Alive	Alive	Alive				0	0	0	0	98	98	94	103	0	-4	9	1.99564	1.99564	1.97772	2.01703	0	-0.0179116	0.0393097	2	2	2	3	30	19	40	45	50	52	57	56	2
722389.34-2994681.83	4UG-HH5935	4UG-HH	2011	2012	2013	2014	5935	5935	SP	CA	Alive	Alive	Alive	Alive				0	0	0	0	17	16	15	20	-1	-1	5	1.25527	1.23045	1.20412	1.32222	-0.0248236	-0.0263289	0.118099	2	2	2	2	36	23	67	62	49	52	51	50	2	0
722387.47-2994682.28	4UG-HH5936	4UG-HH	2011	2012	2013	2014	5936	5936	SP	CA	Alive	Alive	Alive	Alive				0	0	0	0	30	31	40	39	1	9	-1	1.49136	1.50515	1.61278	1.60206	0.0137883	0.107634	-0.0107239	2	2	2	2	25	18	49	37	48	44	47	48	2	0
	4UG-HH5937	4UG-HH				2014	5937		SP	CA				Alive							0				180							2.25768							3				40				60
722389.21-2994679.16	4UG-HH5938	4UG-HH	2011	2012	2013	2014	5938	5938	SP	CA	Alive	Alive	Alive	Alive				0	0	0	0	60	59	65	64	-1	6	-1	1.78533	1.77815	1.81954	1.81291	-0.00717858	0.0413927	-0.00663058	2	2	2	2	29	35	35	30	47	63	50	45	3	5
722390.80-2994676.91	4UG-HH5939	4UG-HH	2011	2012	2013	2014	5939	5939	SP	CA	Alive	Alive	Alive	Alive				0	0	0	0	10	10	11	12	0	1	1	1.04139	1.04139	1.07918	1.11394	0	0.0377886	0.0347621	2	2	2	2	24	30	38	28	56	59	56	57	2	0
722390.69-2994677.93	4UG-HH5940	4UG-HH	2011	2012	2013	2014	5940	5940	SP	CA	Alive	Alive	Alive	Alive				0	0	0	0	36	33	32	30	-3	-1	-2	1.5682	1.53148	1.51851	1.49136	-0.0367228	-0.012965	-0.0271522	2	2	2	2	32	30	46	43	55	50	50	58	1	0
722391.43-2994678.07	4UG-HH5941	4UG-HH	2011	2012	2013	2014	5941	5941	SP	CA	Alive	Alive	Alive	Alive				0	0	0	0	29	23	27	28	-6	4	1	1.47712	1.38021	1.44716	1.4624	-0.09691	0.0669468	0.01524	2	2	2	2	26	15	50	34	46	39	44	45	0	0
722390.16-2994676.39	4UG-HH5942	4UG-HH	2011	2012	2013	2014	5942	5942	SP	CA	Alive	Alive	Alive	Alive				0	0	0	0	90	87	93	100	-3	6	7	1.95904	1.94448	1.97313	2.00432	-0.0145587	0.0286452	0.0311935	2	2	2	3	38	27	34	27	48	47	45	46	4	5
722391.14-2994676.53	4UG-HH5943	4UG-HH	2011	2012	2013	2014	5943	5943	SP	CA	Alive	Alive	Alive	Alive				0	0	0	0	37	28	32	31	-9	4	-1	1.57978	1.4624	1.51851	1.50515	-0.117386	0.0561159	-0.013364	2	2	2	2	35	23	44	34	58	54	61	55	2	0
722390.17-2994694.88	4UG-HH5944	4UG-HH	2011	2012	2013	2014	5944	5944	SP	CA	Alive	Alive	Alive	Alive				0	0	0	0	24	23	29	31	-1	6	2	1.39794	1.38021	1.47712	1.50515	-0.0177288	0.09691	0.0280287	2	2	2	2	37	9	63	50	48	47	71	56	3
722392.14-2994692.05	4UG-HH5945	4UG-HH	2011	2012	2013	2014	5945	5945	SP	CA	Alive	Alive	Alive	Alive				0	0	0	0	28	22	23	30	-6	1	7	1.4624	1.36173	1.38021	1.49136	-0.10067	0.0184834	0.11115	2	2	2	2	24	25		27	47	33		43	3	0
722390.85-2994693.40	4UG-HH5946	4UG-HH	2011	2012	2013	2014	5946	5946	SP	CA	Alive	Alive	Alive	Alive				0	0	0	0	13	13	23	20	0	10	-3	1.14613	1.14613	1.38021	1.32222	0	0.234083	-0.0579919	2	2	2	2	32	19	73	51	41	38	60	41	0	0
722387.57-2994690.43	4UG-HH5947	4UG-HH	2011	2012	2013	2014	5947	5947	SP	CA	Alive	Alive	Alive	Alive				0	0	0	0	69	64	70	68	-5	6	-2	1.8451	1.81291	1.85126	1.83885	-0.0321847	0.038345	-0.0124093	2	2	2	2	35	52	43	40	48	66	55	53	2	5
722385.58-2994684.67	4UG-HH5948	4UG-HH	2011	2012	2013	2014	5948	5948	SP	CA	Alive	Alive	Alive	Alive				0	0	0	0	193	197	205	205	4	8	0	2.2878	2.29667	2.31387	2.31387	0.00886346	0.017202	0	3	3	3	3	39	37	40	37	61	53	61	55	8	9
722383.42-2994688.43	4UG-HH5949	4UG-HH	2011	2012	2013	2014	5949	5949	SP	CA	Alive	Alive	Alive	Alive				0	0	0	0	16	11	20	20	-5	9	0	1.23045	1.07918	1.32222	1.32222	-0.151268	0.243038	0	2	2	2	2	18	19	64	27	21	40	46	32	0	0
722366.46-2994675.11	5UG-LH5951	5UG-LH		2012	2013	2014	5951	5951	SP	CB		Alive	Alive	Alive					0	0	0		43	55	55		12	0		1.64345	1.74819	1.74819		0.104735	0		2	2	2		20	58	42		38	52	50		0
722315.03-2994656.36	5UG-LH5952	5UG-LH		2012	2013	2014	5952	5952	SP	CB		Alive	Alive	Alive					0	0	0		434	445	450		11	5		2.63849	2.64933	2.65418		0.0108456	0.00484168		4	4	4		80	55	82		70	55	65		21
722506.67-2994975.20	1G-UH5953	1G-UH	2011	2012	2013	2014	5953	5953	CP	SC	Alive	Alive	Alive	Alive				0	0	0	0	7	4	5	5	-3	1	0	0.90309	0.69897	0.778151	0.778151	-0.20412	0.0791812	0	1	1	1	1	25	13	21	12	34	33	30	30	0	0
722506.22-2994976.63	1G-UH5954	1G-UH	2011	2012	2013	2014	5954	5954	CP	SC	Alive	Alive	Alive	Alive				0	0	0	0	17	10	15	13	-7	5	-2	1.25527	1.04139	1.20412	1.14613	-0.21388	0.162727	-0.0579919	2	2	2	2	28	22	43	16	38	44	54	37	0	0
722511.98-2994976.50	1G-UH5955	1G-UH	2011	2012	2013	2014	5955	5955	CP	SC	Alive	Alive	Alive	Alive				0	0	0	0	20	10	18	15	-10	8	-3	1.32222	1.04139	1.27875	1.20412	-0.280827	0.237361	-0.0746336	2	2	2	2	48	17	95	62	50	50	49	49	0	0
722515.00-2994972.90	1G-UH5956	1G-UH	2011	2012	2013	2014	5956	5956	CP	SC	Alive	Alive	Alive	Alive				0	0	0	0	5	5	9	11	0	4	2	0.778151	0.778151	1	1.07918	0	0.221849	0.0791812	1	1	1	2	33	35	44	51	43	46	39	46	0	0
722514.92-2994973.12	1G-UH5957	1G-UH	2011	2012	2013	2014	5957	5957	CP	SC	Alive	Alive	Alive	Alive				0	0	0	0	29	30	27	35	1	-3	8	1.47712	1.49136	1.44716	1.5563	0.0142404	-0.0442037	0.109144	2	2	2	2	40	49	49	48	46	50	50	53	0	0
722505.86-2994975.69	1G-UH5958	1G-UH	2011	2012	2013	2014	5958	5958	CP	SC	Alive	Alive	Alive	Alive				0	0	0	0	17	18	16	19	1	-2	3	1.25527	1.27875	1.23045	1.30103	0.0234811	-0.0483047	0.0705811	2	2	2	2	32	20	43	20	42	42	40	35	0	0
722511.06-2994976.27	1G-UH5959	1G-UH	2011	2012	2013	2014	5959	5959	CP	SC	Alive	Alive	Alive	Alive				0	0	0	0	33	28	32	33	-5	4	1	1.53148	1.4624	1.51851	1.53148	-0.0690809	0.0561159	0.012965	2	2	2	2	40	30	70	47	45	49	51	49	0	0
722514.09-2994971.27	1G-UH5960	1G-UH	2011	2012	2013	2014	5960	5960	CP	SC	Alive	Alive	Alive	Alive				0	0	0	0	16	11	16	25	-5	5	9	1.23045	1.07918	1.23045	1.41497	-0.151268	0.151268	0.184524	2	2	2	2	40	30	48	39	44	50	52	50	0	0
722510.49-2994976.39	1G-UH5961	1G-UH	2011	2012	2013	2014	5961	5961	CP	SC	Alive	Alive	Alive	Alive				0	0	0	0	44	37	44	48	-7	7	4	1.65321	1.57978	1.65321	1.6902	-0.0734289	0.0734289	0.0369836	2	2	2	2	48	30	72	45	54	55	66	65	0	0
722515.07-2994972.66	1G-UH5962	1G-UH	2011	2012	2013	2014	5962	5962	CP	SC	Alive	Alive	Alive	Alive				0	0	0	0	15	11	14	13	-4	3	-1	1.20412	1.07918	1.17609	1.14613	-0.124939	0.09691	-0.0299632	2	2	2	2	40	30	46	17	45	38	54	42	0	0
722511.26-2994973.98	1G-UH5963	1G-UH	2011	2012	2013	2014	5963	5963	CP	SC	Alive	Alive	Alive	Alive				0	0	0	0	164	160	165	170	-4	5	5	2.21748	2.20683	2.22011	2.233	-0.0106581	0.0132822	0.012888	3	3	3	3	40	35	45	33	52	47	61	62	0	0
722508.11-2994973.83	1G-UH5964	1G-UH	2011	2012	2013	2014	5964	5964	CP	SC	Alive	Alive	Alive	Alive				0	0	0	0	168	163	167	170	-5	4	3	2.22789	2.21484	2.22531	2.233	-0.0130429	0.0104654	0.00768683	3	3	3	3	36	38	50	42	54	49	61	57	0	0
722515.23-2994972.47	1G-UH5965	1G-UH	2011	2012	2013	2014	5965	5965	CP	SC	Alive	Alive	Alive	Alive				0	0	0	0	22	16	19	20	-6	3	1	1.36173	1.23045	1.30103	1.32222	-0.131279	0.0705811	0.0211893	2	2	2	2	45	47	66	61	59	59	44	55	0	0
722506.97-2994980.12	1G-UH5966	1G-UH	2011	2012	2013	2014	5966	5966	CP	SC	Alive	Alive	Unknown	Alive				0	0		0	16	22		35	6			1.23045	1.36173		1.5563	0.131279			2	2		2	35	28		43	46	45		50	0	0
722514.91-2994972.68	1G-UH5967	1G-UH	2011	2012	2013	2014	5967	5967	CP	SC	Alive	Alive	Alive	Alive				0	0	0	0	28	31	34	40	3	3	6	1.4624	1.50515	1.54407	1.61278	0.042752	0.0389181	0.0687158	2	2	2	2	40	32	70	54	50	35	59	57	0	0
722512.01-2994971.34	1G-UH5968	1G-UH	2011	2012	2013	2014	5968	5968	CP	SC	Alive	Alive	Alive	Alive				0	0	0	0	59	50	53	60	-9	3	7	1.77815	1.70757	1.73239	1.78533	-0.0705811	0.0248236	0.0529361	2	2	2	2	30	26	50	40	45	43	51	52	0	0
722509.44-2994973.49	1G-UH5969	1G-UH	2011	2012	2013	2014	5969	5969	CP	SC	Alive	Alive	Alive	Alive				0	0	0	0	30	33	38	33	3	5	-5	1.49136	1.53148	1.59106	1.53148	0.0401172	0.0595857	-0.0595857	2	2	2	2	60	42	75	52	53	55	52	50	0	0
722507.08-2994972.85	1G-UH5970	1G-UH	2011	2012	2013	2014	5970	5970	CP	SC	Alive	Alive	Alive	Alive				0	0	0	0	28	20	28	36	-8	8	8	1.4624	1.32222	1.4624	1.5682	-0.140179	0.140179	0.105804	2	2	2	2	65	30	82	37	45	50	58	55	0	0
722504.18-2994976.88	1G-UH5971	1G-UH	2011	2012	2013	2014	5971	5971	CP	SC	Alive	Alive	Alive	Alive				0	0	0	0	16	14	21	17	-2	7	-4	1.23045	1.17609	1.34242	1.25527	-0.0543577	0.166331	-0.0871502	2	2	2	2	40	37	71	38	59	61	65	61	0	0
722505.40-2994974.32	1G-UH5972	1G-UH	2011	2012	2013	2014	5972	5972	CP	SC	Alive	Alive	Alive	Alive				0	0	0	0	17	12	18	19	-5	6	1	1.25527	1.11394	1.27875	1.30103	-0.141329	0.16481	0.0222764	2	2	2	2	30	34	51	28	37	43	41	38	0	0
722503.16-2994977.16	1G-UH5973	1G-UH	2011	2012	2013	2014	5973	5973	CP	SC	Alive	Alive	Alive	Alive				0	0	0	0	145	145	143	150	0	-2	7	2.16435	2.16435	2.15836	2.17898	0	-0.00599036	0.0206145	3	3	3	3		47	58	45		58	57	56	0	0
722504.26-2994973.15	1G-UH5974	1G-UH	2011	2012	2013	2014	5974	5974	CP	SC	Alive	Alive	Alive	Alive				0	0	0	0	14	13	15	15	-1	2	0	1.17609	1.14613	1.20412	1.20412	-0.0299632	0.0579919	0	2	2	2	2	21	17	26	25	43	40	42	44	0	0
722507.57-2994971.70	1G-UH5975	1G-UH	2011	2012	2013	2014	5975	5975	CP	SC	Alive	Alive	Alive	Alive				0	0	0	0	34	29	30	25	-5	1	-5	1.54407	1.47712	1.49136	1.41497	-0.0669468	0.0142404	-0.0763883	2	2	2	2	45	38	46	41	44	49	52	49	0	0
722506.12-2994974.43	1G-UH5976	1G-UH	2011	2012	2013	2014	5976	5976	CP	SC	Alive	Alive	Alive	Alive				0	0	0	0	17	18	25	25	1	7	0	1.25527	1.27875	1.41497	1.41497	0.0234811	0.13622	0	2	2	2	2	42	40	63	37	42	49	53	48	0	0
722505.50-2994974.10	1G-UH5977	1G-UH	2011	2012	2013	2014	5977	5977	CP	SC	Alive	Alive	Alive	Alive				0	0	0	0	16	12	18	16	-4	6	-2	1.23045	1.11394	1.27875	1.23045	-0.116506	0.16481	-0.0483047	2	2	2	2	30	38	42	32	44	49	46	43	0	0
722498.55-2994976.16	1G-UH5979	1G-UH	2011	2012	2013	2014	5979	5979	CP	SC	Alive	Alive	Alive	Alive				0	0	0	0	107	120	119	130	13	-1	11	2.03342	2.08279	2.07918	2.11727	0.0493616	-0.00360412	0.03809	3	3	3	3	26	19	40	30	54	49	61	61	0	0
722507.24-2994970.25	1G-UH5980	1G-UH	2011	2012	2013	2014	5980	5980	CP	SC	Alive	Alive	Alive	Alive				0	0	0	0	28	22	32	24	-6	10	-8	1.4624	1.36173	1.51851	1.39794	-0.10067	0.156786	-0.120574	2	2	2	2	50	36	78	46	50	50	54	50	0	0
722551.44-2994986.70	2G-HH5982	2G-HH	2011	2012	2013	2014	5982	5982	CP	CA	Alive	Alive	Alive	Alive				0	0	0	0	280	280	270	283	0	-10	13	2.44871	2.44871	2.43297	2.45332	0	-0.015737	0.020349	4	4	4	4		44	58	38		50	65	59		13
722548.59-2994987.58	2G-HH5983	2G-HH	2011	2012	2013	2014	5983	5983	CP	CA	Alive	Alive	Alive	Alive				0	0	0	0	88	86	84	90	-2	-2	6	1.94939	1.93952	1.92942	1.95904	-0.00987075	-0.0101003	0.0296225	2	2	2	2		24	31	17		17	50	43		5
722547.47-2994988.25	2G-HH5984	2G-HH	2011	2012	2013	2014	5984	5984	CP	CA	Alive	Alive	Alive	Alive				0	0	0	0	86	80	82	82	-6	2	0	1.93952	1.90849	1.91908	1.91908	-0.0310342	0.0105931	0	2	2	2	2	30	10	23	17	50	42	42	38	1	2
722497.12-2994969.47	1G-UH5985	1G-UH	2011	2012	2013	2014	5985	5985	CP	SC	Alive	Alive	Alive	Alive				0	0	0	0	115	110	128	122	-5	18	-6	2.06446	2.04532	2.11059	2.08991	-0.019135	0.0652667	-0.0206846	3	3	3	3		36	35	30		50	50	50	0
722493.32-2994973.41	1G-UH5987	1G-UH	2011	2012	2013	2014	5987	5987	CP	SC	Alive	Alive	Alive	Alive				0	0	0	0	153	150	161	170	-3	11	9	2.18752	2.17898	2.20952	2.233	-0.00854377	0.0305381	0.0234811	3	3	3	3	45	38	40	50	53	59	60	61	0	0
722550.33-2994984.18	2G-HH5988	2G-HH	2011	2012	2013	2014	5988	5988	CP	CA	Alive	Alive	Alive	Alive				0	0	0	0	246	245	247	255	-1	2	8	2.3927	2.39094	2.39445	2.40824	-0.00176185	0.00351657	0.0137883	3	3	3	4	67	35	30	35	65	39	39	42	7	6
722498.42-2994967.80	1G-UH5989	1G-UH	2011	2012	2013	2014	5989	5989	CP	SC	Alive	Alive	Alive	Alive				0	0	0	0	116	108	122	122	-8	14	0	2.06819	2.03743	2.08991	2.08991	-0.0307594	0.0524786	0	3	3	3	3		40	56	45		64	67	68	0	0
722548.07-2994990.69	2G-HH5990	2G-HH	2011	2012	2013	2014	5990	5990	CP	CA	Alive	Alive	Alive	Alive				0	0	0	0	70	70	63	71	0	-7	8	1.85126	1.85126	1.80618	1.85733	0	-0.0450784	0.0511525	2	2	2	2	17	29	41	30	45	40	42	39	2	0
722496.84-2994970.91	1G-UH5991	1G-UH	2011	2012	2013	2014	5991	5991	CP	SC	Alive	Alive	Alive	Alive				0	0	0	0	280	290	290	285	10	0	-5	2.44871	2.46389	2.46389	2.45637	0.0151867	0	-0.00752696	4	4	4	4		74		50		53	53	60	0	0
722495.01-2994971.33	1G-UH5992	1G-UH	2011	2012	2013	2014	5992	5992	CP	SC	Alive	Alive	Alive	Alive				0	0	0	0	110	110	115	120	0	5	5	2.04532	2.04532	2.06446	2.08279	0	0.019135	0.0183274	3	3	3	3	44	40	49	30	48	45	43	42	0	0
722551.25-2994987.61	2G-HH5993	2G-HH	2011	2012	2013	2014	5993	5993	CP	CA	Alive	Alive	Alive	Alive				0	0	0	0	257	260	250	275	3	-10	25	2.41162	2.41664	2.39967	2.44091	0.0050208	-0.0169668	0.0412354	4	4	4	4		32	58	50		62	80	63		14
722497.58-2994977.21	1G-UH5994	1G-UH	2011	2012	2013	2014	5994	5994	CP	SC	Alive	Alive	Alive	Alive				0	0	0	0	156	150	155	160	-6	5	5	2.1959	2.17898	2.19312	2.20683	-0.0169227	0.0141477	0.0137013	3	3	3	3	40	34	64	54	55	56	78	60	0	0
722509.51-2994970.82	1G-UH5995	1G-UH	2011	2012	2013	2014	5995	5995	CP	SC	Alive	Alive	Alive	Alive				0	0	0	0	13	8	15	10	-5	7	-5	1.14613	0.954243	1.20412	1.04139	-0.191886	0.249877	-0.162727	2	1	2	2	56	24	46	14	48	53	47	39	0	0
722494.75-2994976.85	1G-UH5996	1G-UH	2011	2012	2013	2014	5996	5996	CP	SC	Alive	Alive	Alive	Alive				0	0	0	0		105	107	117		2	10		2.02531	2.03342	2.07188		0.00811789	0.0384583		3	3	3		30	43	43		54	57	60	0	0
722504.87-2994975.16	1G-UH5997	1G-UH	2011	2012	2013	2014	5997	5997	CP	SC	Alive	Alive	Alive	Alive				0	0	0	0	43	36	38	35	-7	2	-3	1.64345	1.5682	1.59106	1.5563	-0.075251	0.0228629	-0.0347621	2	2	2	2	22	18	38	36	35	37	43	43	0	0
722508.81-2994971.54	1G-UH5998	1G-UH	2011	2012	2013	2014	5998	5998	CP	SC	Alive	Alive	Alive	Alive				0	0	0	0	26	22	30	24	-4	8	-6	1.43136	1.36173	1.49136	1.39794	-0.0696359	0.129634	-0.0934217	2	2	2	2	45	38	54	33	58	59	51	42	0	0
722495.74-2994977.46	1G-UH5999	1G-UH	2011	2012	2013	2014	5999	5999	CP	SC	Alive	Alive	Alive	Alive				0	0	0	0	164	165	178	173	1	13	-5	2.21748	2.22011	2.25285	2.24055	0.00262414	0.0327449	-0.0123038	3	3	3	3	38	40	60	50	68	80	70	90	0	0
722547.80-2994990.72	2G-HH6000	2G-HH	2011	2012	2013	2014	6000	6000	CP	CA	Alive	Alive	Alive	Alive				0	0	0	0	150	158	148	148	8	-10	0	2.17898	2.2014	2.17319	2.17319	0.0224202	-0.0282109	0	3	3	3	3		18	35	20		43	46	47	2	4
722564.31-2995036.15	3G-LH6020	3G-LH	2011	2012	2013	2014	6020	6020	CP	CB	Alive	Alive	Alive	Alive				0	0	0	0	127	124	128	127	-3	4	-1	2.10721	2.09691	2.11059	2.10721	-0.0103	0.0136797	-0.00337974	3	3	3	3		27	67	36		55	57	48		9
722563.36-2995035.73	3G-LH6021	3G-LH	2011	2012	2013	2014	6021	6021	CP	CB	Alive	Alive	Alive	Alive				0	0	0	0	133	130	131	140	-3	1	9	2.1271	2.11727	2.12057	2.14922	-0.0098335	0.00330264	0.0286452	3	3	3	3		25	52	40		66	70	64		10
722553.82-2995052.80	3G-LH6023	3G-LH	2011	2012	2013	2014	6023	6023	CP	CB	Alive	Alive	Alive	Alive				0	0	0	0	165	160	162	169	-5	2	7	2.22011	2.20683	2.21219	2.23045	-0.0132822	0.00536173	0.0182613	3	3	3	3	34	22	51	39	50	47	57	51	7	7
722554.08-2995052.57	3G-LH6024	3G-LH	2011	2012	2013	2014	6024	6024	CP	CB	Alive	Alive	Alive	Alive				0	0	0	0	110	103	111	117	-7	8	6	2.04532	2.01703	2.04922	2.07188	-0.0282896	0.0321847	0.022664	3	3	3	3	43	24	69	36	55	56	60	48	3	6
722538.44-2995063.58	3G-LH6025	3G-LH	2011	2012	2013	2014	6025	6025	CP	CB	Alive	Alive	Alive	Alive				0	0	0	0	310	320	313	320	10	-7	7	2.49276	2.50651	2.49693	2.50651	0.0137446	-0.00957538	0.00957538	4	4	4	4	92	36	53	35	61	47	56	55	11	8
722570.72-2995038.71	3G-LH6026	3G-LH	2011	2012	2013	2014	6026	6026	CP	CB	Alive	Alive	Alive	Alive				0	0	0	0	240	250	260	264	10	10	4	2.38202	2.39967	2.41664	2.42325	0.0176567	0.0169668	0.00660537	3	4	4	4		47	45	60		60	68	70	0	17
722538.48-2995047.59	3G-LH6027	3G-LH	2011	2012	2013	2014	6027	6027	CP	CB	Alive	Alive	Alive	Alive				0	0	0	0	105	102	106	102	-3	4	-4	2.02531	2.01284	2.02938	2.01284	-0.0124686	0.0165466	-0.0165466	3	3	3	3	33	16	38	30	47	44	43	47	1	3
722538.49-2995052.83	3G-LH6028	3G-LH	2011	2012	2013		6028	6028	CP	CB	Alive	Alive	Dead					0	0	1		193	206			13			2.2878	2.31597			0.0281686			3	3			36	22			54	39			1	4
722547.11-2995056.29	3G-LH6029	3G-LH	2011	2012	2013	2014	6029	6029	CP	CB	Alive	Alive	Alive	Alive				0	0	0	0	5	4	5	4	-1	1	-1	0.778151	0.69897	0.778151	0.69897	-0.0791812	0.0791812	-0.0791812	1	1	1	1	8	5	12	8	30	38	33	30	0	0
722537.41-2995063.11	3G-LH6030	3G-LH	2011	2012	2013	2014	6030	6030	CP	CB	Alive	Alive	Alive	Alive				0	0	0	0	170	170	163	165	0	-7	2	2.233	2.233	2.21484	2.22011	0	-0.0181523	0.00526424	3	3	3	3	27	18	26	18	53	45	46	46	4	7
722539.35-2995065.19	3G-LH6031	3G-LH	2011	2012	2013	2014	6031	6031	CP	CB	Alive	Alive	Alive	Alive				0	0	0	0	153	150	142	146	-3	-8	4	2.18752	2.17898	2.15534	2.16732	-0.00854377	-0.0236409	0.0119813	3	3	3	3	37	12	27	26	45	39	45	46	5	3
722552.63-2995061.14	3G-LH6032	3G-LH	2011	2012	2013	2014	6032	6032	CP	CB	Alive	Alive	Alive	Alive				0	0	0	0	159	160	161	161	1	1	0	2.20412	2.20683	2.20952	2.20952	0.00270589	0.00268914	0	3	3	3	3	28	24	33	28	51	50	51	51	2	5
722550.07-2995065.47	3G-LH6033	3G-LH	2011	2012	2013	2014	6033	6033	CP	CB	Alive	Alive	Alive	Alive				0	0	0	0	168	170	172	170	2	2	-2	2.22789	2.233	2.23805	2.233	0.00510941	0.00504999	-0.00504999	3	3	3	3	29	43	23	23	50	47	43	53	4	6
722542.04-2995062.61	3G-LH6034	3G-LH	2011	2012	2013	2014	6034	6034	CP	CB	Alive	Alive	Alive	Alive				0	0	0	0	130	120	120	120	-10	0	0	2.11727	2.08279	2.08279	2.08279	-0.0344859	0	0	3	3	3	3	34	17	32	24	52	40	43	45	1	5
722535.76-2995062.64	3G-LH6035	3G-LH	2011	2012	2013		6035	6035	CP	CB	Alive	Alive	Dead					0	0	1		140	142			2			2.14922	2.15534			0.00611692			3	3			39	12			50	40			3	0
722540.46-2995060.86	3G-LH6036	3G-LH	2011	2012	2013	2014	6036	6036	CP	CB	Alive	Alive	Alive	Alive				0	0	0	0	248	261	255	256	13	-6	1	2.3962	2.4183	2.40824	2.40993	0.0221019	-0.0100613	0.00169316	3	4	4	4	67	30	46	35	57	52	56	55	17	12
722542.68-2995058.20	3G-LH6037	3G-LH	2011	2012	2013	2014	6037	6037	CP	CB	Alive	Alive	Alive	Dead				0	0	0	1	9	9	8		0	-1		1	1	0.954243		0	-0.0457575		1	1	1		11	12	10		31	31	10		0	0
722551.84-2995060.54	3G-LH6038	3G-LH	2011	2012	2013	2014	6038	6038	CP	CB	Alive	Alive	Alive	Alive				0	0	0	0	115	130	132	136	15	2	4	2.06446	2.11727	2.12385	2.13672	0.0528133	0.00658035	0.0128689	3	3	3	3	35	32	52	35	52	55	61	77	2	4
722553.36-2995064.21	3G-LH6040	3G-LH	2011	2012	2013	2014	6040	6040	CP	CB	Alive	Alive	Alive	Alive				0	0	0	0	120	115	118	116	-5	3	-2	2.08279	2.06446	2.07555	2.06819	-0.0183274	0.011089	-0.0073611	3	3	3	3	26	10	22	19	43	40	30	36	0	0
722553.65-2995049.34	3G-LH6041	3G-LH	2011	2012	2013	2014	6041	6041	CP	CB	Alive	Alive	Alive	Alive				0	0	0	0	2	2	3	3	0	1	0	0.477121	0.477121	0.60206	0.60206	0	0.124939	0	1	1	1	1	6	17	15	3	38	23	13	35	0	0
722543.12-2995055.15	3G-LH6042	3G-LH	2011	2012	2013	2014	6042	6042	CP	CB	Alive	Alive	Alive	Alive				0	0	0	0	5	2	3	3	-3	1	0	0.778151	0.477121	0.60206	0.60206	-0.30103	0.124939	0	1	1	1	1	5	3	7	2.5	36	26	19	18	0
722542.70-2995050.50	3G-LH6043	3G-LH	2011	2012	2013	2014	6043	6043	CP	CB	Alive	Alive	Alive	Alive				0	0	0	0	16	11	13	10	-5	2	-3	1.23045	1.07918	1.14613	1.04139	-0.151268	0.0669468	-0.104735	2	2	2	2	19	27	22	22	34	28	36	38	0	0
722553.67-2995063.82	3G-LH6044	3G-LH	2011	2012	2013	2014	6044	6044	CP	CB	Alive	Alive	Alive	Alive				0	0	0	0	145	145	143	144	0	-2	1	2.16435	2.16435	2.15836	2.16137	0	-0.00599036	0.00300551	3	3	3	3	38	26	40	33	57	52	50	49	2	4
722534.41-2995066.36	3G-LH6045	3G-LH	2011	2012	2013	2014	6045	6045	CP	CB	Alive	Alive	Alive	Alive				0	0	0	0	5	4	7	8	-1	3	1	0.778151	0.69897	0.90309	0.954243	-0.0791812	0.20412	0.0511525	1	1	1	1	27	8	40	26	49	45	52	40	0	0
722537.07-2995047.40	3G-LH6046	3G-LH	2011	2012	2013	2014	6046	6046	CP	CB	Alive	Alive	Alive	Alive				0	0	0	0	153	150	146	149	-3	-4	3	2.18752	2.17898	2.16732	2.17609	-0.00854377	-0.0116596	0.00877392	3	3	3	3	49	18	51	36	56	56	62	61	4	6
722532.60-2995063.93	3G-LH6047	3G-LH	2011	2012	2013	2014	6047	6047	CP	CB	Alive	Alive	Alive	Alive				0	0	0	0	4	5	8	14	1	3	6	0.69897	0.778151	0.954243	1.17609	0.0791812	0.176091	0.221849	1	1	1	2	25	24	37	20	50	44	44	46	0	0
722553.88-2995064.73	3G-LH6048	3G-LH	2011	2012	2013	2014	6048	6048	CP	CB	Alive	Alive	Alive	Alive				0	0	0	0	190	190	196	201	0	6	5	2.28103	2.28103	2.29447	2.30535	0	0.0134329	0.0108851	3	3	3	3	45	17	44	34	50	50	52	57	5	7
722546.01-2995062.05	3G-LH6049	3G-LH	2011	2012	2013		6049	6049	CP	CB	Alive	Alive	Dead					0	0	1		2	2			0			0.477121	0.477121			0			1	1			4	9			37	39			0	0
722540.34-2995060.46	3G-LH6050	3G-LH	2011	2012	2013	2014	6050	6050	CP	CB	Alive	Alive	Alive	Alive				0	0	0	0	7	6	9	8	-1	3	-1	0.90309	0.845098	1	0.954243	-0.0579919	0.154902	-0.0457575	1	1	1	1	28	17	39	35	43	40	41	42	0	0
722540.21-2995063.02	3G-LH6051	3G-LH	2011	2012	2013	2014	6051	6051	CP	CB	Alive	Alive	Dead	NSE				0	0	1		0	1			1			0	0.30103			0.30103			1	1			5	3			50	29			0	0
722540.93-2995066.81	3G-LH6052	3G-LH	2011	2012	2013	2014	6052	6052	CP	CB	Alive	Alive	Alive	Alive				0	0	0	0	6	4	5	4	-2	1	-1	0.845098	0.69897	0.778151	0.69897	-0.146128	0.0791812	-0.0791812	1	1	1	1	22	3	38	15	41	24	32	30	0	0
722546.50-2995060.25	3G-LH6053	3G-LH	2011	2012	2013	2014	6053	6053	CP	CB	Alive	Alive	Alive	NSE				0	0	0		1	2	2		1	0		0.30103	0.477121	0.477121		0.176091	0		1	1	1		2	2	9		46	30	40		0	0
722543.16-2995062.12	3G-LH6055	3G-LH	2011	2012	2013	2014	6055	6055	CP	CB	Alive	Alive	Alive	Alive				0	0	0	0	7	4	5	5	-3	1	0	0.90309	0.69897	0.778151	0.778151	-0.20412	0.0791812	0	1	1	1	1	12	16	13	10	37	40	38	34	0	0
722536.16-2995067.07	3G-LH6056	3G-LH	2011	2012	2013	2014	6056	6056	CP	CB	Alive	Alive	Alive	Alive				0	0	0	0	12	11	12	14	-1	1	2	1.11394	1.07918	1.11394	1.17609	-0.0347621	0.0347621	0.0621479	2	2	2	2	23	20	11	11	46	40	29	36	0
722552.87-2995060.43	3G-LH6057	3G-LH	2011	2012	2013	2014	6057	6057	CP	CB	Alive	Alive	Alive	Dead				0	0	0	1	1	2	2		1	0		0.30103	0.477121	0.477121		0.176091	0		1	1	1		19	5	29		30	30	32		0	0
722552.16-2995060.38	3G-LH6058	3G-LH	2011	2012	2013	2014	6058	6058	CP	CB	Alive	Alive	Alive	Dead				0	0	0	1	2	3	3		1	0		0.477121	0.60206	0.60206		0.124939	0		1	1	1		19	15	20		32	29	30		0	0
722537.53-2995052.27	3G-LH6064	3G-LH	2011	2012	2013	2014	6064	6064	CP	CB	Alive	Alive	Alive	Alive				0	0	0	0	5	7	10	10	2	3	0	0.778151	0.90309	1.04139	1.04139	0.124939	0.138303	0	1	1	2	2	19	17	20	16	45	40	40	39	0	0
722564.88-2995059.25	3G-LH6104	3G-LH	2011	2012	2013	2014	6104	6104	CP	CB	Alive	Alive	Alive	Alive				0	0	0	0	40	39	40	40	-1	1	0	1.61278	1.60206	1.61278	1.61278	-0.0107239	0.0107239	0	2	2	2	2	43	54	44	45	53	60	58	54	4	4
722563.53-2995058.86	3G-LH6105	3G-LH	2011	2012	2013	2014	6105	6105	CP	CB	Alive	Alive	Alive	Alive				0	0	0	0	43	39	36	45	-4	-3	9	1.64345	1.60206	1.5682	1.66276	-0.0413927	-0.0338583	0.0945561	2	2	2	2	52	41	44	35		63	58	54	3	5
722562.28-2995057.80	3G-LH6106	3G-LH	2011	2012	2013	2014	6106	6106	CP	CB	Alive	Alive	Alive	Alive				0	0	0	0	43	41	45	47	-2	4	2	1.64345	1.62325	1.66276	1.68124	-0.0202034	0.0395085	0.0184834	2	2	2	2	42	69	83	40	53	60	59	52	1	2
722561.62-2995058.05	3G-LH6108	3G-LH	2011	2012	2013	2014	6108	6108	CP	CB	Alive	Alive	Alive	Alive				0	0	0	0	20	17	21	25	-3	4	4	1.32222	1.25527	1.34242	1.41497	-0.0669468	0.0871502	0.0725507	2	2	2	2	39	39	51	33	41	44	44	42	1	2
722561.97-2995057.39	3G-LH6109	3G-LH	2011	2012	2013	2014	6109	6109	CP	CB	Alive	Alive	Alive	Alive				0	0	0	0	45	45	42	42	0	-3	0	1.66276	1.66276	1.63347	1.63347	0	-0.0292894	0	2	2	2	2	40	52	63	36	47	55	53	50	2	3
722562.40-2995057.70	3G-LH6110	3G-LH	2011	2012	2013		6110	6110	CP	CB	Alive	Alive	Dead					0	0	1		18	19			1			1.27875	1.30103			0.0222764			2	2			49	38			46	43			0	0
722560.79-2995059.75	3G-LH6111	3G-LH	2011	2012	2013	2014	6111	6111	CP	CB	Alive	Alive	Alive	Alive				0	0	0	0	30	33	23	25	3	-10	2	1.49136	1.53148	1.38021	1.41497	0.0401172	-0.151268	0.0347621	2	2	2	2	34	57	65	41	47	54	50	45	0	3
722562.39-2995058.60	3G-LH6112	3G-LH	2011	2012	2013	2014	6112	6112	CP	CB	Alive	Alive	Alive	Alive				0	0	0	0	61	61	66	60	0	5	-6	1.79239	1.79239	1.82607	1.78533	0	0.0336831	-0.040745	2	2	2	2	61	69	59	45	64	62	66	60	3	4
722561.47-2995061.55	3G-LH6114	3G-LH	2011	2012	2013	2014	6114	6114	CP	CB	Alive	Alive	Alive	Alive				0	0	0	0	110	104	108	110	-6	4	2	2.04532	2.02119	2.03743	2.04532	-0.0241337	0.0162372	0.00789648	3	3	3	3	3	32	51	36	52	53	56	53	3	4
722563.19-2995061.85	3G-LH6115	3G-LH		2012	2013	2014	6115	6115	CP	CB		Alive	Unknown	Alive					0		0		192		220					2.28556		2.34439					3		3		67		71		74		65		13
722561.88-2995061.94	3G-LH6116	3G-LH		2012	2013	2014	6116	6116	CP	CB		Alive	Alive	Alive					0	0	0		16	23	23		7	0		1.23045	1.38021	1.38021		0.149762	0		2	2	2		62	73	30		52	49	37		3
722560.32-2995057.78	3G-LH6117	3G-LH	2011	2012	2013	2014	6117	6117	CP	CB	Alive	Alive	Alive	Alive				0	0	0	0	31	29	30	30	-2	1	0	1.50515	1.47712	1.49136	1.49136	-0.0280287	0.0142404	0	2	2	2	2	48	42	44	29	44	29	44	40	1	1
722561.07-2995058.74	3G-LH6118	3G-LH	2011	2012	2013	2014	6118	6118	CP	CB	Alive	Alive	Alive	Alive				0	0	0	0	63	70	69	70	7	-1	1	1.80618	1.85126	1.8451	1.85126	0.0450784	-0.00616031	0.00616031	2	2	2	2	37	49	60	43	50	62	53	49	3	3
722265.34-2994640.46	6UG-UH6059	6UG-UH	2011	2012	2013		6059	6059	SP	SC	Alive	Alive	Alive					0	0	0		10	10	8		0	-2		1.04139	1.04139	0.954243		0	-0.0871502		2	2	1		15	26	19	0	26	36	27		0
722334.22-2994651.37	5UG-LH6060	5UG-LH	2011	2012	2013		6060	6060	SP	CB	Alive	Alive	Alive					0	0	0		1	7	5		6	-2		0.30103	0.90309	0.778151		0.60206	-0.124939		1	1	1		5	10	7		19	42	39		0
	4UG-HH6062	4UG-HH				2014	6062		SP	CA				Alive							0				4							0.69897							1				33				37
722559.91-2995061.06	3G-LH6119	3G-LH	2011	2012	2013	2014	6119	6119	CP	CB	Alive	Alive	Alive	Alive				0	0	0	0	26	24	21	26	-2	-3	5	1.43136	1.39794	1.34242	1.43136	-0.0334238	-0.0555173	0.0889411	2	2	2	2	47	56	45	33	47	49	45	43	1	1
722540.01-2995012.69	2G-HH6101	2G-HH	2011	2012	2013	2014	6101	6101	CP	CA	Alive	Alive	Alive	Dead				0	0	0	1	17	12	14		-5	2		1.25527	1.11394	1.17609		-0.141329	0.0621479		2	2	2		28	45	5		30	40	18		0	0
722550.62-2995013.90	2G-HH6102	2G-HH	2011	2012	2013	2014	6102	6102	CP	CA	Alive	Alive	Alive	Dead				0	0	0	1	10	7	7		-3	0		1.04139	0.90309	0.90309		-0.138303	0		2	1	1		27	30	23		40	40	47		0	0
722551.53-2995010.19	2G-HH6103	2G-HH	2011	2012	2013	2014	6103	6103	CP	CA	Alive	Alive	Alive	Alive				0	0	0	0	18	10	8	10	-8	-2	2	1.27875	1.04139	0.954243	1.04139	-0.237361	-0.0871502	0.0871502	2	2	1	2	10	29	16	14	27	40	41	31	0	0
722560.39-2995057.13	3G-LH6120	3G-LH	2011	2012	2013	2014	6120	6120	CP	CB	Alive	Alive	Alive	Alive				0	0	0	0	50	52	55	50	2	3	-5	1.70757	1.72428	1.74819	1.70757	0.0167057	0.0239122	-0.0406179	2	2	2	2	43	47	43	29	44	50	42	39	2	2
722561.99-2995056.66	3G-LH6121	3G-LH	2011	2012	2013	2014	6121	6121	CP	CB	Alive	Alive	Alive	Alive				0	0	0	0	35	32	30	36	-3	-2	6	1.5563	1.51851	1.49136	1.5682	-0.0377886	-0.0271522	0.07684	2	2	2	2	41	52	48	18	40	42	44	37	0	1
722562.95-2995056.87	3G-LH6122	3G-LH	2011	2012	2013	2014	6122	6122	CP	CB	Alive	Alive	Alive	Alive				0	0	0	0	30	23	30	37	-7	7	7	1.49136	1.38021	1.49136	1.57978	-0.11115	0.11115	0.0884219	2	2	2	2	47	55	51	31	50	53	49	52	1	1
722561.95-2995054.23	3G-LH6123	3G-LH	2011	2012	2013	2014	6123	6123	CP	CB	Alive	Alive	Alive	Alive				0	0	0	0	20	15	18	19	-5	3	1	1.32222	1.20412	1.27875	1.30103	-0.118099	0.0746336	0.0222764	2	2	2	2	43	44	48	38	45	36	43	44	0	0
722558.11-2995054.76	3G-LH6129	3G-LH	2011	2012	2013	2014	6129	6129	CP	CB	Alive	Alive	Alive	Dead				0	0	0	1	28	24	21		-4	-3		1.4624	1.39794	1.34242		-0.064458	-0.0555173		2	2	2		48	37	34		40	40	35		1	0
722557.36-2995055.21	3G-LH6130	3G-LH	2011	2012	2013	2014	6130	6130	CP	CB	Alive	Alive	Alive	Dead				0	0	0	1	29	26	26		-3	0		1.47712	1.43136	1.43136		-0.0457575	0		2	2	2		58	44	42		52	47	42		1	0
722556.40-2995053.72	3G-LH6131	3G-LH	2011	2012	2013	2014	6131	6131	CP	CB	Alive	Alive	Alive	Dead				0	0	0	1	79	84	90		5	6		1.90309	1.92942	1.95904		0.0263289	0.0296225		2	2	2		32	50	40		55	56	48		3	5
722557.85-2995053.62	3G-LH6132	3G-LH	2011	2012	2013	2014	6132	6132	CP	CB	Alive	Alive	Alive	Alive				0	0	0	0	42	40	40	36	-2	0	-4	1.63347	1.61278	1.61278	1.5682	-0.0206846	0	-0.0445821	2	2	2	2	26	36	27	14	45	34	35	36	0	0
722557.47-2995053.76	3G-LH6133	3G-LH	2011	2012	2013		6133	6133	CP	CB	Alive	Alive	Dead					0	0	1		21	24			3			1.34242	1.39794			0.0555173			2	2			65	68			40	47			0	3
722559.79-2995053.64	3G-LH6134	3G-LH	2011	2012	2013	2014	6134	6134	CP	CB	Alive	Alive	Alive	Dead				0	0	0	1	37	35	33		-2	-2		1.57978	1.5563	1.53148		-0.0234811	-0.0248236		2	2	2		55	57	56		51	49	32		1	2
722560.32-2995058.22	3G-LH6135	3G-LH	2011	2012	2013	2014	6135	6135	CP	CB	Alive	Alive	Alive	Alive				0	0	0	0	22	12	21	20	-10	9	-1	1.36173	1.11394	1.34242	1.32222	-0.247784	0.228479	-0.0202034	2	2	2	2	81	82	43	55	40	40	20	45	0	0
722559.49-2995057.63	3G-LH6136	3G-LH	2011	2012	2013	2014	6136	6136	CP	CB	Alive	Alive	Alive	Alive				0	0	0	0	66	75	65	70	9	-10	5	1.82607	1.88081	1.81954	1.85126	0.0547388	-0.0612697	0.0317144	2	2	2	2	47	47	49	27	54	59	51	50	4	6
722558.78-2995057.14	3G-LH6137	3G-LH	2011	2012	2013	2014	6137	6137	CP	CB	Alive	Alive	Alive	Alive				0	0	0	0	30	28	31	29	-2	3	-2	1.49136	1.4624	1.50515	1.47712	-0.0289637	0.042752	-0.0280287	2	2	2	2	50	56	54	22	45	44	44	44	1	0
722558.47-2995056.59	3G-LH6138	3G-LH	2011	2012	2013	2014	6138	6138	CP	CB	Alive	Alive	Alive	Dead				0	0	0	1	25	28	30		3	2		1.41497	1.4624	1.49136		0.0474246	0.0289637		2	2	2		43	55	39		38	36	35		0	0
722557.77-2995056.04	3G-LH6139	3G-LH	2011	2012	2013	2014	6139	6139	CP	CB	Alive	Alive	Alive	Alive				0	0	0	0	35	34	40	40	-1	6	0	1.5563	1.54407	1.61278	1.61278	-0.0122345	0.0687158	0	2	2	2	2	39	62	58	23	49	32	46	42	2	3
722559.85-2995056.64	3G-LH6140	3G-LH	2011	2012	2013	2014	6140	6140	CP	CB	Alive	Alive	Alive	Alive				0	0	0	0		23	24	29		1	5		1.38021	1.39794	1.47712		0.0177288	0.0791812		2	2	2	66	99	95	44	59	62	65	50	2	2
722559.31-2995055.86	3G-LH6141	3G-LH	2011	2012	2013	2014	6141	6141	CP	CB	Alive	Alive	Alive	Dead				0	0	0	1	19	18	17		-1	-1		1.30103	1.27875	1.25527		-0.0222764	-0.0234811		2	2	2		35	50	16		50	51	33		0	1
722559.67-2995056.81	3G-LH6142	3G-LH	2011	2012	2013	2014	6142	6142	CP	CB	Alive	Alive	Alive	Alive				0	0	0	0	54	53	49	49	-1	-4	0	1.74036	1.73239	1.69897	1.69897	-0.00796893	-0.0334238	0	2	2	2	2	47	51	66	32	45	45	39	35	2	3
722559.97-2995055.82	3G-LH6143	3G-LH	2011	2012	2013	2014	6143	6143	CP	CB	Alive	Alive	Alive	Dead				0	0	0	1	12	14	12		2	-2		1.11394	1.17609	1.11394		0.0621479	-0.0621479		2	2	2		29	20	10		32	25	14		0	0
722560.24-2995054.61	3G-LH6144	3G-LH	2011	2012	2013	2014	6144	6144	CP	CB	Alive	Alive	Alive	Dead				0	0	0	1	12	13	13		1	0		1.11394	1.14613	1.14613		0.0321847	0		2	2	2		42	39	40		49	59	51		0	0
722558.70-2995054.17	3G-LH6145	3G-LH	2011	2012	2013	2014	6145	6145	CP	CB	Alive	Alive	Alive	Dead				0	0	0	1	36	40	45		4	5		1.5682	1.61278	1.66276		0.0445821	0.049974		2	2	2		70	79	95		49	54	50		2	3
722560.94-2995056.39	3G-LH6146	3G-LH	2011	2012	2013	2014	6146	6146	CP	CB	Alive	Alive	Unknown	Dead				0	0	1		0	0						0	0						1	1			2	8			37	37			0	0
722561.97-2995059.85	3G-LH6147	3G-LH	2011	2012	2013	2014	6147	6147	CP	CB	Alive	Alive	Alive	Alive				0	0	0	0	28	22	27	26	-6	5	-1	1.4624	1.36173	1.44716	1.43136	-0.10067	0.0854302	-0.0157943	2	2	2	2	25	39	40	26	49	44	50	44	0	0
722560.45-2995056.49	3G-LH6148	3G-LH		2012	2013		6148	6148	CP	CB		Alive	Dead		1				0	1			1							0.30103							1				3				49				0
722562.10-2995058.23	3G-LH6149	3G-LH	2011	2012	2013	2014	6149	6149	CP	CB	Alive	Alive	Alive	Alive				0	0	0	0	80	79	85	87	-1	6	2	1.90849	1.90309	1.9345	1.94448	-0.00539503	0.0314085	0.00998422	2	2	2	2	40	32	51	29	58	53	54	50	3	5
722562.20-2995058.16	3G-LH6150	3G-LH	2011	2012	2013	2014	6150	6150	CP	CB	Alive	Alive	Alive	Alive				0	0	0	0	8	7	11	11	-1	4	0	0.954243	0.90309	1.07918	1.07918	-0.0511525	0.176091	0	1	1	2	2	23	34	37	16	34	39	39	27	0	0
722560.18-2995055.29	3G-LH6151	3G-LH	2011	2012	2013	2014	6151	6151	CP	CB	Alive	Alive	Alive	Alive				0	0	0	0	20	20	20	28	0	0	8	1.32222	1.32222	1.32222	1.4624	0	0	0.140179	2	2	2	2	66	68	52	28	48	52	50	40	0	2
722558.95-2995057.34	3G-LH6152	3G-LH	2011	2012	2013	2014	6152	6152	CP	CB	Alive	Alive	Alive	Alive				0	0	0	0	120	121	124	121	1	3	-3	2.08279	2.08636	2.09691	2.08636	0.00357446	0.0105502	-0.0105502	3	3	3	3	41	47	38	50	61	57	55	50	5	4
722559.49-2995057.00	3G-LH6153	3G-LH	2011	2012	2013	2014	6153	6153	CP	CB	Alive	Alive	Alive	Dead				0	0	0	1	20	20	20		0	0		1.32222	1.32222	1.32222		0	0		2	2	2		66	81	37		41	34	15		0	1
722560.46-2995056.17	3G-LH6154	3G-LH	2011	2012	2013	2014	6154	6154	CP	CB	Alive	Alive	Alive	Dead				0	0	0	1	29	32	37		3	5		1.47712	1.51851	1.57978		0.0413927	0.0612697		2	2	2		47	72	54		49	43	36		0	0
722561.31-2995056.79	3G-LH6155	3G-LH	2011	2012	2013	2014	6155	6155	CP	CB	Alive	Alive	Alive	Alive				0	0	0	0	43	48	42	43	5	-6	1	1.64345	1.6902	1.63347	1.64345	0.0467434	-0.0567276	0.00998422	2	2	2	2	45	50	49	39	58	48	38	44	1	2
722558.85-2995056.05	3G-LH6156	3G-LH	2011	2012	2013	2014	6156	6156	CP	CB	Alive	Alive	Alive	Dead				0	0	0	1	49	53	62		4	9		1.69897	1.73239	1.79934		0.0334238	0.0669468		2	2	2		52	35	55		48	44	40		5	6
722561.84-2995055.10	3G-LH6157	3G-LH	2011	2012	2013	2014	6157	6157	CP	CB	Alive	Alive	Alive	Alive				0	0	0	0	128	125	127	130	-3	2	3	2.11059	2.10037	2.10721	2.11727	-0.0102192	0.00683942	0.0100613	3	3	3	3	32	36	48	36	46	52	56	49	5	7
722559.09-2995053.26	3G-LH6158	3G-LH	2011	2012	2013	2014	6158	6158	CP	CB	Alive	Alive	Alive	Alive				0	0	0	0	35	30	32	28	-5	2	-4	1.5563	1.49136	1.51851	1.4624	-0.0649408	0.0271522	-0.0561159	2	2	2	2	46	50	64	28	45	52	50	50	0	0
722559.59-2995053.31	3G-LH6159	3G-LH	2011	2012	2013	2014	6159	6159	CP	CB	Alive	Alive	Alive	Alive				0	0	0	0	65	61	70	64	-4	9	-6	1.81954	1.79239	1.85126	1.81291	-0.0271522	0.0588667	-0.038345	2	2	2	2	49	50	69	34	56	57	54	48	2	4
722558.46-2995054.33	3G-LH6160	3G-LH	2011	2012	2013	2014	6160	6160	CP	CB	Alive	Alive	Alive	Dead				0	0	0	1	34	32	37		-2	5		1.54407	1.51851	1.57978		-0.0255541	0.0612697		2	2	2		45	46	62		46	52	47		1	0
722558.54-2995054.81	3G-LH6161	3G-LH	2011	2012	2013	2014	6161	6161	CP	CB	Alive	Alive	Alive	Dead				0	0	0	1		40	33			-7			1.61278	1.53148			-0.0813049			2	2		44	53	65		54	62	59		2	4
722556.35-2995052.36	3G-LH6162	3G-LH	2011	2012	2013	2014	6162	6162	CP	CB	Alive	Alive	Alive	Alive				0	0	0	0	180	180	184	190	0	4	6	2.25768	2.25768	2.26717	2.28103	0	0.00949315	0.0138616	3	3	3	3	52	40	50	50	53	45	58	54	8	8
722557.20-2995055.01	3G-LH6163	3G-LH	2011	2012	2013	2014	6163	6163	CP	CB	Alive	Alive	Alive	Alive				0	0	0	0	121	121	126	123	0	5	-3	2.08636	2.08636	2.1038	2.09342	0	0.0174439	-0.010382	3	3	3	3	40	43	67	24	49	53	49	40	4	4
722556.05-2995054.01	3G-LH6164	3G-LH	2011	2012	2013	2014	6164	6164	CP	CB	Alive	Alive	Alive	Dead				0	0	0	1	33	30	30		-3	0		1.53148	1.49136	1.49136		-0.0401172	0		2	2	2		60	68	50		48	44	38		3	0
722556.70-2995054.18	3G-LH6165	3G-LH	2011	2012	2013	2014	6165	6165	CP	CB	Alive	Alive	Alive	Dead				0	0	0	1	14	14	15		0	1		1.17609	1.17609	1.20412		0	0.0280287		2	2	2		40	58	39		47	48	38		2	0
722555.23-2995052.41	3G-LH6166	3G-LH		2012	2013	2014	6166	6166	CP	CB		Alive	Alive	Dead					0	0	1		102	107			5			2.01284	2.03342			0.0205865			3	3			55	50			52	56			3
722555.33-2995054.75	3G-LH6167	3G-LH	2011	2012	2013	2014	6167	6167	CP	CB	Alive	Alive	Alive	Dead				0	0	0	1	48	48	49		0	1		1.6902	1.6902	1.69897		0	0.00877392		2	2	2		36	36	52		44	48	41		3	5
722554.61-2995056.39	3G-LH6168	3G-LH	2011	2012	2013	2014	6168	6168	CP	CB	Alive	Alive	Alive	Alive				0	0	0	0	175	168	182	180	-7	14	-2	2.24551	2.22789	2.26245	2.25768	-0.017626	0.0345644	-0.00477251	3	3	3	3	46	35	54	38	59	56	67	57	6	6
722555.26-2995057.98	3G-LH6169	3G-LH	2011	2012	2013	2014	6169	6169	CP	CB	Alive	Alive	Alive	Alive				0	0	0	0	57	58	55	55	1	-3	0	1.76343	1.77085	1.74819	1.74819	0.00742402	-0.022664	0	2	2	2	2	46	56	25	38	50	52	52	50	1	3
722552.64-2995056.52	3G-LH6170	3G-LH	2011	2012	2013	2014	6170	6170	CP	CB	Alive	Alive	Alive	Alive				0	0	0	0	294	295	303	303	1	8	0	2.46982	2.47129	2.48287	2.48287	0.0014697	0.0115819	0	4	4	4	4	75	43	38	33	65	50	62	43	19	12
722555.63-2995056.73	3G-LH6171	3G-LH	2011	2012	2013	2014	6171	6171	CP	CB	Alive	Alive	Alive	Alive				0	0	0	0	70	72	70	71	2	-2	1	1.85126	1.86332	1.85126	1.85733	0.0120645	-0.0120645	0.00607415	2	2	2	2	38	36	56	25	50	60	56	48	2	4
722557.27-2995056.90	3G-LH6172	3G-LH	2011	2012	2013	2014	6172	6172	CP	CB	Alive	Alive	Alive	Alive				0	0	0	0	96	99	101	93	3	2	-8	1.98677	2	2.0086	1.97313	0.0132283	0.00860017	-0.0354723	2	2	3	2	44	39	32	23	45	51	38	47	3	6
722558.84-2995054.45	3G-LH6173	3G-LH	2011	2012	2013	2014	6173	6173	CP	CB	Alive	Alive	Alive	Dead				0	0	0	1	130	124	140		-6	16		2.11727	2.09691	2.14922		-0.0203613	0.0523091		3	3	3		39	44	35		60	68	66		6	7
722556.81-2995059.14	3G-LH6175	3G-LH	2011	2012	2013	2014	6175	6175	CP	CB	Alive	Alive	Alive	Dead				0	0	0	1	21	19	22		-2	3		1.34242	1.30103	1.36173		-0.0413927	0.0606978		2	2	2		37	36	18		52	40	44		0	1
722557.63-2995058.25	3G-LH6176	3G-LH	2011	2012	2013	2014	6176	6176	CP	CB	Alive	Alive	Alive	Alive				0	0	0	0	37	32	38	30	-5	6	-8	1.57978	1.51851	1.59106	1.49136	-0.0612697	0.0725507	-0.0997029	2	2	2	2	34	50	37	32	51	47	56	50	1	3
722557.21-2995058.23	3G-LH6177	3G-LH	2011	2012	2013	2014	6177	6177	CP	CB	Alive	Alive	Alive	Alive				0	0	0	0	85	88	81	92	3	-7	11	1.9345	1.94939	1.91381	1.96848	0.0148916	-0.0355762	0.0546691	2	2	2	2	32	35	45	31	54	52	54	52	3	5
722556.82-2995059.04	3G-LH6178	3G-LH	2011	2012	2013	2014	6178	6178	CP	CB	Alive	Alive	Alive	Alive				0	0	0	0	24	23	24	22	-1	1	-2	1.39794	1.38021	1.39794	1.36173	-0.0177288	0.0177288	-0.0362122	2	2	2	2	36	30	51	17	40	38	44	32	0	0
722555.46-2995059.30	3G-LH6179	3G-LH	2011	2012	2013	2014	6179	6179	CP	CB	Alive	Alive	Alive	Dead				0	0	0	1	19	13	17		-6	4		1.30103	1.14613	1.25527		-0.154902	0.109144		2	2	2		54	39	52		46	42	41		0	0
722556.05-2995058.77	3G-LH6180	3G-LH	2011	2012	2013	2014	6180	6180	CP	CB	Alive	Alive	Alive	Alive				0	0	0	0	38	45	42	50	7	-3	8	1.59106	1.66276	1.63347	1.70757	0.0716932	-0.0292894	0.0741017	2	2	2	2	32	35	43	25	43	48	50	42	2	4
722557.20-2995059.32	3G-LH6181	3G-LH	2011	2012	2013	2014	6181	6181	CP	CB	Alive	Alive	Alive	Dead				0	0	0	1	54	52	51		-2	-1		1.74036	1.72428	1.716		-0.0160868	-0.00827253		2	2	2		26	34	34		46	46	50		0	1
722556.41-2995059.30	3G-LH6182	3G-LH	2011	2012	2013	2014	6182	6182	CP	CB	Alive	Alive	Alive	Dead				0	0	0	1	35	35	36		0	1		1.5563	1.5563	1.5682		0	0.0118992		2	2	2		32	47	43		40	29	31		0	2
722554.22-2995059.57	3G-LH6183	3G-LH	2011	2012	2013	2014	6183	6183	CP	CB	Alive	Alive	Alive	Alive				0	0	0	0	20	22	23	20	2	1	-3	1.32222	1.36173	1.38021	1.32222	0.0395085	0.0184834	-0.0579919	2	2	2	2	35	56	62	41	42	47	52	49	0	2
722554.33-2995058.84	3G-LH6184	3G-LH	2011	2012	2013	2014	6184	6184	CP	CB	Alive	Alive	Alive	Alive				0	0	0	0	40	46	36	36	6	-10	0	1.61278	1.6721	1.5682	1.5682	0.059314	-0.103896	0	2	2	2	2	43	49	29	21	58	48	38	43	2	4
722555.24-2995057.75	3G-LH6185	3G-LH	2011	2012	2013	2014	6185	6185	CP	CB	Alive	Alive	Alive	Dead				0	0	0	1	24	26	20		2	-6		1.39794	1.43136	1.32222		0.0334238	-0.109144		2	2	2		27	26	16		35	33	41		0	1
722557.73-2995058.43	3G-LH6186	3G-LH	2011	2012	2013	2014	6186	6186	CP	CB	Alive	Alive	Alive	Alive				0	0	0	0	43	46	49	40	3	3	-9	1.64345	1.6721	1.69897	1.61278	0.0286452	0.0268721	-0.0861861	2	2	2	2	37	52	24	21	50	45	44	40	2	2
722558.37-2995058.68	3G-LH6187	3G-LH	2011	2012	2013	2014	6187	6187	CP	CB	Alive	Alive	Alive	Dead				0	0	0	1	35	35	40		0	5		1.5563	1.5563	1.61278		0	0.0564814		2	2	2		25	46	39		39	44	44		1	2
722555.23-2995057.57	3G-LH6188	3G-LH	2011	2012	2013	2014	6188	6188	CP	CB	Alive	Alive	Unknown	NSE				0	0	1		5	4			-1			0.778151	0.69897			-0.0791812			1	1			7	2			27	22			0	0
722572.44-2995034.41	3G-LH6362	3G-LH	2011	2012	2013	2014	6362	6362	CP	CB	Alive	Alive	Alive	Alive				0	0	0	0	215	207	215	222	-8	8	7	2.33445	2.31806	2.33445	2.3483	-0.0163904	0.0163904	0.0138511	3	3	3	3		55	67	54		53	85	70	0	14
722576.37-2995028.15	3G-LH6363	3G-LH	2011	2012	2013	2014	6363	6363	CP	CB	Alive	Alive	Alive	Alive				0	0	0	0	160	165	160	165	5	-5	5	2.20683	2.22011	2.20683	2.22011	0.0132822	-0.0132822	0.0132822	3	3	3	3		41	50	24		68	65	60	0	7
722575.33-2995033.28	3G-LH6366	3G-LH	2011	2012	2013	2014	6366	6366	CP	CB	Alive	Alive	Alive	Alive				0	0	0	0	178	178	172	180	0	-6	8	2.25285	2.25285	2.23805	2.25768	0	-0.0148069	0.0196325	3	3	3	3		50	53	58		61	66	64	0	10
722574.62-2995033.55	3G-LH6367	3G-LH	2011	2012	2013	2014	6367	6367	CP	CB	Alive	Alive	Alive	Alive				0	0	0	0	206	207	213	220	1	6	7	2.31597	2.31806	2.33041	2.34439	0.00209299	0.0123504	0.0139785	3	3	3	3		49	59	68		68	74	75	0	18
722570.19-2995034.64	3G-LH6368	3G-LH	2011	2012	2013	2014	6368	6368	CP	CB	Alive	Alive	Alive	Alive				0	0	0	0	180	186	181	186	6	-5	5	2.25768	2.27184	2.26007	2.27184	0.014163	-0.0117702	0.0117702	3	3	3	3		33	47	37		60	62	57	12	12
722569.67-2995032.93	3G-LH6369	3G-LH	2011	2012	2013	2014	6369	6369	CP	CB	Alive	Alive	Alive	Alive				0	0	0	0		170	182	192		12	10		2.233	2.26245	2.28556		0.029455	0.0231062		3	3	3		44	68	40		60	72	65	15	21
722567.87-2995034.56	3G-LH6370	3G-LH	2011	2012	2013	2014	6370	6370	CP	CB	Alive	Alive	Alive	Alive				0	0	0	0	220	214	235	236	-6	21	1	2.34439	2.33244	2.37291	2.37475	-0.0119538	0.0404735	0.00183634	3	3	3	3		42	53	40		62	67	58	16	22
722566.71-2995039.64	3G-LH6371	3G-LH	2011	2012	2013	2014	6371	6371	CP	CB	Alive	Alive	Alive	Alive				0	0	0	0	110	110	113	119	0	3	6	2.04532	2.04532	2.0569	2.07918	0	0.0115819	0.0222764	3	3	3	3	52	40	65	38	52	58	60	60	12	10
722567.37-2995042.94	3G-LH6372	3G-LH	2011	2012	2013	2014	6372	6372	CP	CB	Alive	Alive	Alive	Alive				0	0	0	0	150	145	150	147	-5	5	-3	2.17898	2.16435	2.17898	2.17026	-0.0146241	0.0146241	-0.00871523	3	3	3	3	50	43	49	42	65	68	73	62	10	11
	4UG-HH6256	4UG-HH				2014	6256		SP	CA				Alive							0				65							1.81954							2				54				52
722341.85-2994675.31	5UG-LH6261	5UG-LH			2013		6261	6261	SP	CB			Exclude											2							0.477121							1				6				21
722549.55-2994990.05	2G-HH6301	2G-HH	2011	2012	2013	2014	6301	6301	CP	CA	Alive	Alive	Alive	Alive				0	0	0	0	129	125	127	130	-4	2	3	2.11394	2.10037	2.10721	2.11727	-0.0135728	0.00683942	0.0100613	3	3	3	3		13	43	34		49	59	54		7
722554.93-2994990.06	2G-HH6302	2G-HH	2011	2012	2013	2014	6302	6302	CP	CA	Alive	Alive	Alive	Alive				0	0	0	0	129	123	125	129	-6	2	4	2.11394	2.09342	2.10037	2.11394	-0.0205217	0.00694886	0.0135728	3	3	3	3	40	34	39	28	65	61	62	60	6	6
722553.55-2994986.97	2G-HH6303	2G-HH	2011	2012	2013	2014	6303	6303	CP	CA	Alive	Alive	Alive	Alive				0	0	0	0	152	150	144	150	-2	-6	6	2.18469	2.17898	2.16137	2.17898	-0.00571448	-0.0176089	0.0176089	3	3	3	3	49	20	40	32	54	50	55	50	9	8
722555.46-2994993.23	2G-HH6304	2G-HH	2011	2012	2013	2014	6304	6304	CP	CA	Alive	Alive	Alive	Alive				0	0	0	0	166	175	167	175	9	-8	8	2.22272	2.24551	2.22531	2.24551	0.0227962	-0.0202034	0.0202034	3	3	3	3	38	23	34	29	54	52	60	50	4	5
722555.72-2994991.73	2G-HH6305	2G-HH	2011	2012	2013	2014	6305	6305	CP	CA	Alive	Alive	Alive	Alive				0	0	0	0	430	440	450	460	10	10	10	2.63448	2.64444	2.65418	2.6637	0.00996132	0.00973795	0.00952438	4	4	4	4	95	82	53	75	66	72	67	70	23	21
722555.12-2994994.88	2G-HH6306	2G-HH	2011	2012	2013	2014	6306	6306	CP	CA	Alive	Alive	Alive	Alive				0	0	0	0	205	205	200	208	0	-5	8	2.31387	2.31387	2.3032	2.32015	0	-0.0106712	0.0169502	3	3	3	3	49	15	36	40	50	51	52	50	10	13
722548.02-2994998.66	2G-HH6308	2G-HH	2011	2012	2013	2014	6308	6308	CP	CA	Alive	Alive	Alive	Alive				0	0	0	0	100	117	128	128	17	11	0	2.00432	2.07188	2.11059	2.11059	0.0675606	0.0387077	0	3	3	3	3	41	21	29	28	54	46	50	42	12	5
722549.48-2995001.73	2G-HH6309	2G-HH	2011	2012	2013	2014	6309	6309	CP	CA	Alive	Alive	Alive	Alive				0	0	0	0	160	165	165	173	5	0	8	2.20683	2.22011	2.22011	2.24055	0.0132822	0	0.0204412	3	3	3	3	59	26	48	32	64	63	65	70	13	6
722547.23-2995001.55	2G-HH6310	2G-HH	2011	2012	2013	2014	6310	6310	CP	CA	Alive	Alive	Alive	Alive				0	0	0	0	120	120	125	125	0	5	0	2.08279	2.08279	2.10037	2.10037	0	0.0175852	0	3	3	3	3	39	25	34	31	46	44	50	43	9	4
722546.28-2995002.03	2G-HH6311	2G-HH	2011	2012	2013	2014	6311	6311	CP	CA	Alive	Alive	Alive	Alive				0	0	0	0	113	135	139	138	22	4	-1	2.0569	2.13354	2.14613	2.14301	0.0766341	0.0125891	-0.00311324	3	3	3	3	50	25	39	23	53	50	52	47	15	7
722544.59-2994999.23	2G-HH6315	2G-HH	2011	2012	2013	2014	6315	6315	CP	CA	Alive	Alive	Alive	Alive				0	0	0	0	162	178	175	175	16	-3	0	2.21219	2.25285	2.24551	2.24551	0.0406654	-0.00734036	0	3	3	3	3	59	21	43	35	52	54	59	57	16	8
722544.82-2994996.66	2G-HH6316	2G-HH	2011	2012	2013	2014	6316	6316	CP	CA	Alive	Alive	Alive	Dead				0	0	0	1	120	120	122		0	2		2.08279	2.08279	2.08991		0	0.00711974		3	3	3			15	26			40	43		3
722538.07-2994999.92	2G-HH6317	2G-HH	2011	2012	2013	2014	6317	6317	CP	CA	Alive	Alive	Alive	Alive				0	0	0	0	96	100	98	96	4	-2	-2	1.98677	2.00432	1.99564	1.98677	0.0175496	-0.00868618	-0.00886346	2	3	2	2	48	19	43	25	49	59	55	45	6	6
722547.66-2994991.45	2G-HH6317	2G-HH	2011	2012	2013	2014	6317	6317	CP	CA	Alive	Alive	Alive	Alive				0	0	0	0	70	70	75	96	0	5	21	1.85126	1.85126	1.88081	1.98677	0	0.0295552	0.105958	2	2	2	2	40	20	42	25	46	45	52	45	3	5
722536.62-2994997.88	2G-HH6318	2G-HH	2011	2012	2013	2014	6318	6318	CP	CA	Alive	Alive	Alive	Alive				0	0	0	0	99	99	93	96	0	-6	3	2	2	1.97313	1.98677	0	-0.0268721	0.0136439	2	2	2	2	54	40	51	36	55	54	57	50	9	5
722540.28-2994999.93	2G-HH6319	2G-HH	2011	2012	2013	2014	6319	6319	CP	CA	Alive	Alive	Alive	Alive				0	0	0	0	50	55	45	48	5	-10	3	1.70757	1.74819	1.66276	1.6902	0.0406179	-0.0854302	0.0274382	2	2	2	2		24	29	15		47	27	38	6	4
722541.28-2995001.08	2G-HH6320	2G-HH	2011	2012	2013	2014	6320	6320	CP	CA	Alive	Alive	Alive	Alive				0	0	0	0	100	103	110	117	3	7	7	2.00432	2.01703	2.04532	2.07188	0.012712	0.0282896	0.026559	3	3	3	3	67	19	50	41	54	54	59	48	6	6
722540.48-2995003.39	2G-HH6321	2G-HH	2011	2012	2013	2014	6321	6321	CP	CA	Alive	Alive	Alive	Alive				0	0	0	0	130	130	125	136	0	-5	11	2.11727	2.11727	2.10037	2.13672	0	-0.0169008	0.03635	3	3	3	3	33	18	29	22	54	45	46	42	6	6
722535.88-2995005.77	2G-HH6322	2G-HH	2011	2012	2013	2014	6322	6322	CP	CA	Alive	Alive	Alive	Alive				0	0	0	0	103	107	105	107	4	-2	2	2.01703	2.03342	2.02531	2.03342	0.0163904	-0.00811789	0.00811789	3	3	3	3	49	22	40	19	50	53	58	58	10	7
722543.07-2995004.39	2G-HH6323	2G-HH	2011	2012	2013	2014	6323	6323	CP	CA	Alive	Alive	Alive	Alive				0	0	0	0	147	164	161	162	17	-3	1	2.17026	2.21748	2.20952	2.21219	0.0472222	-0.00796893	0.00267259	3	3	3	3	57	19	50	34	52	56	61	52	15	9
722543.13-2995005.63	2G-HH6324	2G-HH	2011	2012	2013	2014	6324	6324	CP	CA	Alive	Alive	Alive	Alive				0	0	0	0	18	11	15	18	-7	4	3	1.27875	1.07918	1.20412	1.27875	-0.199572	0.124939	0.0746336	2	2	2	2	51	45	43	30	42	40	40	36	0	0
722535.26-2995004.96	2G-HH6325	2G-HH	2011	2012	2013	2014	6325	6325	CP	CA	Alive	Alive	Alive	Alive				0	0	0	0	40	39	35	36	-1	-4	1	1.61278	1.60206	1.5563	1.5682	-0.0107239	-0.0457575	0.0118992	2	2	2	2	47	34	46	23	50	49	62	53	4	5
722535.90-2995004.12	2G-HH6326	2G-HH	2011	2012	2013	2014	6326	6326	CP	CA	Alive	Alive	Alive	Alive				0	0	0	0	20	20	23	23	0	3	0	1.32222	1.32222	1.38021	1.38021	0	0.0579919	0	2	2	2	2	30	22	43	14	40	40	41	40	1	0
722536.45-2995003.79	2G-HH6327	2G-HH	2011	2012	2013	2014	6327	6327	CP	CA	Alive	Alive	Alive	Alive				0	0	0	0	30	27	29	30	-3	2	1	1.49136	1.44716	1.47712	1.49136	-0.0442037	0.0299632	0.0142404	2	2	2	2	45	50	39	12	46	42	48	19	1	0
722533.87-2995003.72	2G-HH6328	2G-HH	2011	2012	2013	2014	6328	6328	CP	CA	Alive	Alive	Alive	Alive				0	0	0	0	159	163	165	160	4	2	-5	2.20412	2.21484	2.22011	2.20683	0.0107239	0.00526424	-0.0132822	3	3	3	3	48	20	30	24	54	36	57	53	14	9
722532.72-2995002.07	2G-HH6329	2G-HH	2011	2012	2013	2014	6329	6329	CP	CA	Alive	Alive	Alive	Dead				0	0	0	1	20	16	18		-4	2		1.32222	1.23045	1.27875		-0.0917704	0.0483047		2	2	2			27	24			48	41		4	3
722531.25-2995001.01	2G-HH6330	2G-HH		2012	2013	2014	6330	6330	CP	CA		Alive	Alive	Alive					0	0	0		16	20	16		4	-4		1.23045	1.32222	1.23045		0.0917704	-0.0917704		2	2	2		10	32	25		46	39	37		5
722531.21-2994998.71	2G-HH6332	2G-HH	2011	2012	2013	2014	6332	6332	CP	CA	Alive	Alive	Alive	Alive				0	0	0	0	100	100	102	102	0	2	0	2.00432	2.00432	2.01284	2.01284	0	0.00851585	0	3	3	3	3	32	25	40	33	47	50	46	50	4	5
722536.00-2994993.78	2G-HH6333	2G-HH	2011	2012	2013	2014	6333	6333	CP	CA	Alive	Alive	Alive	Alive				0	0	0	0	60	63	61	62	3	-2	1	1.78533	1.80618	1.79239	1.79934	0.0208501	-0.0137883	0.00694886	2	2	2	2	10	22	26	24	49	44	46	43	2	4
722537.64-2994992.63	2G-HH6334	2G-HH	2011	2012	2013	2014	6334	6334	CP	CA	Alive	Alive	Alive	Alive				0	0	0	0	107	116	113	110	9	-3	-3	2.03342	2.06819	2.0569	2.04532	0.0347621	-0.011281	-0.0115819	3	3	3	3	31	28	28	23	60	44	50	53	3	5
722537.61-2994992.85	2G-HH6335	2G-HH	2011	2012	2013	2014	6335	6335	CP	CA	Alive	Alive	Alive	Alive				0	0	0	0	100	97	100	98	-3	3	-2	2.00432	1.99123	2.00432	1.99564	-0.0130953	0.0130953	-0.00868618	3	2	3	2	39	20	42	34	48	49	50	49	2	5
722530.83-2995003.22	2G-HH6336	2G-HH	2011	2012	2013	2014	6336	6336	CP	CA	Alive	Alive	Alive	Alive				0	0	0	0	131	122	125	130	-9	3	5	2.12057	2.08991	2.10037	2.11727	-0.0306688	0.0104654	0.0169008	3	3	3	3	42	25	37	21	46	47	49	44	10	7
722538.75-2995000.82	2G-HH6337	2G-HH	2011	2012	2013	2014	6337	6337	CP	CA	Alive	Alive	Alive	Alive				0	0	0	0	42	42	52	45	0	10	-7	1.63347	1.63347	1.72428	1.66276	0	0.0908074	-0.061518	2	2	2	2	20	33	53	20	37	53	50	48	0	4
722531.75-2995004.17	2G-HH6338	2G-HH	2011	2012	2013	2014	6338	6338	CP	CA	Alive	Alive	Alive	Alive				0	0	0	0	167	160	178	170	-7	18	-8	2.22531	2.20683	2.25285	2.233	-0.0184834	0.0460272	-0.0198569	3	3	3	3	44	25	47	30	70	68	63	70	13	10
722532.36-2995007.46	2G-HH6339	2G-HH	2011	2012	2013	2014	6339	6339	CP	CA	Alive	Alive	Alive	Alive				0	0	0	0	169	160	171	174	-9	11	3	2.23045	2.20683	2.23553	2.24304	-0.023623	0.0287026	0.0075096	3	3	3	3	57	44	44	39	64	63	49	58	15	12
722544.52-2995006.90	2G-HH6341	2G-HH	2011	2012	2013	2014	6341	6341	CP	CA	Alive	Alive	Alive	Alive				0	0	0	0	33	31	29	33	-2	-2	4	1.53148	1.50515	1.47712	1.53148	-0.0263289	-0.0280287	0.0543577	2	2	2	2	88	40	52	36	52	62	60	44	4	5
722545.74-2995005.95	2G-HH6342	2G-HH	2011	2012	2013	2014	6342	6342	CP	CA	Alive	Alive	Alive	Alive				0	0	0	0	104	103	111	127	-1	8	16	2.02119	2.01703	2.04922	2.10721	-0.00415596	0.0321847	0.0579919	3	3	3	3	40	17	39	30	59	50	54	56	10	6
722545.53-2995007.89	2G-HH6343	2G-HH	2011	2012	2013	2014	6343	6343	CP	CA	Alive	Alive	Alive	Alive				0	0	0	0	180	182	177	182	2	-5	5	2.25768	2.26245	2.25042	2.26245	0.00477251	-0.0120311	0.0120311	3	3	3	3	52	25	45	40	62	58	63	67	15	10
722544.30-2995007.13	2G-HH6344	2G-HH	2011	2012	2013	2014	6344	6344	CP	CA	Alive	Alive	Alive	Dead				0	0	0	1	47	40	41		-7	1		1.68124	1.61278	1.62325		-0.0684574	0.0104654		2	2	2		30	40	39		55	53	46		2	4
722541.28-2995010.74	2G-HH6345	2G-HH	2011	2012	2013	2014	6345	6345	CP	CA	Alive	Alive	Alive	Alive				0	0	0	0	32	38	32	32	6	-6	0	1.51851	1.59106	1.51851	1.51851	0.0725507	-0.0725507	0	2	2	2	2	78	39	64	20	47	56	53	35	6	4
722538.53-2995013.05	2G-HH6346	2G-HH	2011	2012	2013	2014	6346	6346	CP	CA	Alive	Alive	Alive	Alive				0	0	0	0	50	40	45	48	-10	5	3	1.70757	1.61278	1.66276	1.6902	-0.0947863	0.049974	0.0274382	2	2	2	2	43	42	50	30	53	56	56	46	3	6
722537.61-2995008.27	2G-HH6347	2G-HH	2011	2012	2013		6347	6347	CP	CA	Alive	Alive	Dead					0	0	1		20	16			-4			1.32222	1.23045			-0.0917704			2	2			60	30			57	50			5	5
722535.37-2995009.04	2G-HH6348	2G-HH	2011	2012	2013	2014	6348	6348	CP	CA	Alive	Alive	Alive	Alive				0	0	0	0	20	11	13	13	-9	2	0	1.32222	1.07918	1.14613	1.14613	-0.243038	0.0669468	0	2	2	2	2	23	25	18	18	44	30	45	43	0	0
722535.27-2995010.09	2G-HH6349	2G-HH	2011	2012	2013	2014	6349	6349	CP	CA	Alive	Alive	Alive	Alive				0	0	0	0	35	32	27	30	-3	-5	3	1.5563	1.51851	1.44716	1.49136	-0.0377886	-0.0713559	0.0442037	2	2	2	2	50	34	30	22	47	43	43	40	6	6
722536.76-2995013.37	2G-HH6351	2G-HH	2011	2012	2013	2014	6351	6351	CP	CA	Alive	Alive	Alive	Alive				0	0	0	0	139	133	130	130	-6	-3	0	2.14613	2.1271	2.11727	2.11727	-0.0190232	-0.0098335	0	3	3	3	3	45	33	48	35	56	58	60	55	5	9
722537.10-2995013.96	2G-HH6352	2G-HH	2011	2012	2013		6352	6352	CP	CA	Alive	Alive	Alive					0	0	0		10	3	7		-7	4		1.04139	0.60206	0.90309		-0.439333	0.30103		2	1	1		40	15	16		40	39	36		3	0
722536.65-2995014.82	2G-HH6353	2G-HH	2011	2012	2013	2014	6353	6353	CP	CA	Alive	Alive	Alive	Alive				0	0	0	0	36	35	27	30	-1	-8	3	1.5682	1.5563	1.44716	1.49136	-0.0118992	-0.109144	0.0442037	2	2	2	2	38	30	30	22	42	44	43	42	3	0
722525.35-2995011.40	2G-HH6354	2G-HH	2011	2012	2013	2014	6354	6354	CP	CA	Alive	Alive	Alive	Alive				0	0	0	0	157	161	165	165	4	4	0	2.19866	2.20952	2.22011	2.22011	0.0108579	0.0105931	0	3	3	3	3	53	24	56	36	60	53	56	68	16	10
722525.67-2995017.86	2G-HH6355	2G-HH	2011	2012	2013	2014	6355	6355	CP	CA	Alive	Alive	Alive	Alive				0	0	0	0	135	130	130	134	-5	0	4	2.13354	2.11727	2.11727	2.13033	-0.0162676	0	0.0130625	3	3	3	3	27	18	7	18	47	26	34	38	5	0
722524.07-2995014.86	2G-HH6356	2G-HH	2011	2012	2013	2014	6356	6356	CP	CA	Alive	Alive	Alive	Alive				0	0	0	0	140	145	146	148	5	1	2	2.14922	2.16435	2.16732	2.17319	0.0151337	0.00296448	0.00586893	3	3	3	3	48	36	49	41	57	56	60	50	7	8
722519.54-2995013.41	2G-HH6357	2G-HH	2011	2012	2013	2014	6357	6357	CP	CA	Alive	Alive	Alive	Alive				0	0	0	0	139	138	138	156	-1	0	18	2.14613	2.14301	2.14301	2.1959	-0.00311324	0	0.0528849	3	3	3	3	26	22	29	29	52	52	51	51	3	4
722516.07-2995004.71	2G-HH6358	2G-HH	2011	2012	2013	2014	6358	6358	CP	CA	Alive	Alive	Alive	Alive				0	0	0	0	295	310	307	307	15	-3	0	2.47129	2.49276	2.48855	2.48855	0.0214687	-0.00420967	0	4	4	4	4	45	32	32	30	50	53	46	43	16	10
722514.68-2995000.05	2G-HH6359	2G-HH	2011	2012	2013	2014	6359	6359	CP	CA	Alive	Alive	Alive	Alive				0	0	0	0	265	270	265	279	5	-5	14	2.42488	2.43297	2.42488	2.44716	0.00808765	-0.00808765	0.0222764	4	4	4	4	67	37	37	36	57	42	52	55	14	9
722502.31-2995012.76	2G-HH6361	2G-HH	2011	2012	2013	2014	6361	6361	CP	CA	Alive	Alive	Alive	Alive				0	0	0	0	76	73	70	73	-3	-3	3	1.88649	1.86923	1.85126	1.86923	-0.017259	-0.0179734	0.0179734	2	2	2	2		32	36	29		47	42	46	5	7
722568.01-2995043.09	3G-LH6373	3G-LH	2011	2012	2013	2014	6373	6373	CP	CB	Alive	Alive	Alive	Alive				0	0	0	0	190	201	209	209	11	8	0	2.28103	2.30535	2.32222	2.32222	0.024318	0.0168679	0	3	3	3	3	50	48	54	42	65	56	50	63	9	12
722569.88-2995043.68	3G-LH6374	3G-LH	2011	2012	2013	2014	6374	6374	CP	CB	Alive	Alive	Alive	Alive				0	0	0	0	51	52	54	54	1	2	0	1.716	1.72428	1.74036	1.74036	0.00827253	0.0160868	0	2	2	2	2	73	28	57	59	61	63	65	62	5	5
722548.37-2995009.86	2G-HH6364	2G-HH	2011	2012	2013	2014	6364	6364	CP	CA	Alive	Alive	Alive	Alive				0	0	0	0	17	13	18	18	-4	5	0	1.25527	1.14613	1.27875	1.27875	-0.109144	0.132626	0	2	2	2	2	32	30	50	38	47	49	48	49	0	0
722546.35-2995009.83	2G-HH6365	2G-HH		2012	2013	2014	6365	6365	CP	CA		Alive	Alive	Alive					0	0	0		32	34	34		2	0		1.51851	1.54407	1.54407		0.0255541	0		2	2	2		5	73	34		55	57	46		0
722567.28-2995044.51	3G-LH6375	3G-LH	2011	2012	2013	2014	6375	6375	CP	CB	Alive	Alive	Alive	Alive				0	0	0	0	28	24	25	25	-4	1	0	1.4624	1.39794	1.41497	1.41497	-0.064458	0.0170333	0	2	2	2	2	46	53	34	40	44	40	47	40	3	3
722569.44-2995043.35	3G-LH6376	3G-LH	2011	2012	2013	2014	6376	6376	CP	CB	Alive	Alive	Alive	Alive				0	0	0	0	31	38	42	35	7	4	-7	1.50515	1.59106	1.63347	1.5563	0.0859146	0.0424038	-0.077166	2	2	2	2	49	29	58	35	44	50	47	45	5	5
722566.15-2995046.67	3G-LH6377	3G-LH	2011	2012	2013	2014	6377	6377	CP	CB	Alive	Alive	Alive	Alive				0	0	0	0	104	102	102	106	-2	0	4	2.02119	2.01284	2.01284	2.02938	-0.00835207	0	0.0165466	3	3	3	3	38	25	48	33	57	60	62	60	6	5
722567.04-2995047.89	3G-LH6378	3G-LH	2011	2012	2013	2014	6378	6378	CP	CB	Alive	Alive	Alive	Alive				0	0	0	0	59	68	64	55	9	-4	-9	1.77815	1.83885	1.81291	1.74819	0.0606978	-0.0259357	-0.0647253	2	2	2	2	60	49	57	47	52	50	46	46	2	4
722568.79-2995048.40	3G-LH6379	3G-LH	2011	2012	2013	2014	6379	6379	CP	CB	Alive	Alive	Alive	Alive				0	0	0	0	120	123	125	130	3	2	5	2.08279	2.09342	2.10037	2.11727	0.0106363	0.00694886	0.0169008	3	3	3	3	42	30	44	38	68	58	60	57	6	5
722569.52-2995047.87	3G-LH6380	3G-LH	2011	2012	2013	2014	6380	6380	CP	CB	Alive	Alive	Alive	Alive				0	0	0	0	39	39	37	37	0	-2	0	1.60206	1.60206	1.57978	1.57978	0	-0.0222764	0	2	2	2	2	41	36	45	46	55	44	35	46	0	0
722568.08-2995050.10	3G-LH6381	3G-LH	2011	2012	2013	2014	6381	6381	CP	CB	Alive	Alive	Alive	Alive				0	0	0	0	36	26	37	35	-10	11	-2	1.5682	1.43136	1.57978	1.5563	-0.136838	0.14842	-0.0234811	2	2	2	2	41	27	46	43	51	42	49	44	1
722571.29-2995048.42	3G-LH6382	3G-LH	2011	2012	2013	2014	6382	6382	CP	CB	Alive	Alive	Alive	Alive				0	0	0	0	51	52	54	50	1	2	-4	1.716	1.72428	1.74036	1.70757	0.00827253	0.0160868	-0.0327925	2	2	2	2	32	37	50	35	57	49	52	54	2	2
722571.78-2995049.29	3G-LH6383	3G-LH	2011	2012	2013	2014	6383	6383	CP	CB	Alive	Alive	Alive	Alive				0	0	0	0	153	155	175	175	2	20	0	2.18752	2.19312	2.24551	2.24551	0.00560388	0.0523881	0	3	3	3	3	52	36	48	38	65	60	65	63	6	6
722571.76-2995044.18	3G-LH6384	3G-LH	2011	2012	2013	2014	6384	6384	CP	CB	Alive	Alive	Alive	Alive				0	0	0	0	167	164	161	164	-3	-3	3	2.22531	2.21748	2.20952	2.21748	-0.00782534	-0.00796893	0.00796893	3	3	3	3	40	24	41	33	56	60	60	56	5	5
722571.54-2995047.12	3G-LH6385	3G-LH	2011	2012	2013	2014	6385	6385	CP	CB	Alive	Alive	Alive	Alive				0	0	0	0	30	30	32	36	0	2	4	1.49136	1.49136	1.51851	1.5682	0	0.0271522	0.0496878	2	2	2	2	69	50	67	70	54	56	58	60	0	3
722569.97-2995051.73	3G-LH6386	3G-LH	2011	2012	2013	2014	6386	6386	CP	CB	Alive	Alive	Alive	Alive				0	0	0	0	43	40	40	45	-3	0	5	1.64345	1.61278	1.61278	1.66276	-0.0306688	0	0.049974	2	2	2	2	52	40	56	42	55	54	58	55	2	3
722573.07-2995043.89	3G-LH6387	3G-LH	2011	2012	2013	2014	6387	6387	CP	CB	Alive	Alive	Alive	Alive				0	0	0	0	36	33	41	42	-3	8	1	1.5682	1.53148	1.62325	1.63347	-0.0367228	0.0917704	0.0102192	2	2	2	2	50	38	67	56	54	56	52	52	3	5
722569.84-2995046.70	3G-LH6388	3G-LH	2011	2012	2013	2014	6388	6388	CP	CB	Alive	Alive	Alive	Alive				0	0	0	0	57	60	60	60	3	0	0	1.76343	1.78533	1.78533	1.78533	0.0219018	0	0	2	2	2	2	46	17	64	40	66	65	68	62	2	4
722569.61-2995045.64	3G-LH6389	3G-LH	2011	2012	2013	2014	6389	6389	CP	CB	Alive	Alive	Alive	Alive				0	0	0	0	42	40	40	40	-2	0	0	1.63347	1.61278	1.61278	1.61278	-0.0206846	0	0	2	2	2	2	43	46	49	35	57	60	60	50	3	4
722571.57-2995044.41	3G-LH6391	3G-LH	2011	2012	2013	2014	6391	6391	CP	CB	Alive	Alive	Alive	Alive				0	0	0	0	50	42	45	45	-8	3	0	1.70757	1.63347	1.66276	1.66276	-0.0741017	0.0292894	0	2	2	2	2	49	17	49	35	50	50	55	47	2	4
722574.55-2995046.02	3G-LH6392	3G-LH	2011	2012	2013	2014	6392	6392	CP	CB	Alive	Alive	Alive	Alive				0	0	0	0	26	20	26	30	-6	6	4	1.43136	1.32222	1.43136	1.49136	-0.109144	0.109144	0.0599979	2	2	2	2	36	28	38	37	57	50	67	50	1	2
722574.24-2995046.56	3G-LH6393	3G-LH	2011	2012	2013	2014	6393	6393	CP	CB	Alive	Alive	Alive	Alive				0	0	0	0	59	61	60	63	2	-1	3	1.77815	1.79239	1.78533	1.80618	0.0142404	-0.00706185	0.0208501	2	2	2	2	54	45	51	40	64	60	62	57	4	3
722574.24-2995048.62	3G-LH6394	3G-LH	2011	2012	2013	2014	6394	6394	CP	CB	Alive	Alive	Alive	Alive				0	0	0	0	96	95	96	96	-1	1	0	1.98677	1.98227	1.98677	1.98677	-0.0045005	0.0045005	0	2	2	2	2	43	36	42	34	50	58	53	53	6	5
722575.26-2995043.12	3G-LH6395	3G-LH	2011	2012	2013	2014	6395	6395	CP	CB	Alive	Alive	Alive	Alive				0	0	0	0	60	50	62	53	-10	12	-9	1.78533	1.70757	1.79934	1.73239	-0.0777597	0.0917704	-0.0669468	2	2	2	2	38	38	50	47	52	58	52	53	4	5
722577.15-2995045.91	3G-LH6396	3G-LH	2011	2012	2013	2014	6396	6396	CP	CB	Alive	Alive	Alive	Alive				0	0	0	0	43	35	40	45	-8	5	5	1.64345	1.5563	1.61278	1.66276	-0.0871502	0.0564814	0.049974	2	2	2	2	53	34	60	59	51	54	52	50	2	4
722574.76-2995043.00	3G-LH6397	3G-LH	2011	2012	2013	2014	6397	6397	CP	CB	Alive	Alive	Alive	Alive				0	0	0	0	14	10	15	16	-4	5	1	1.17609	1.04139	1.20412	1.23045	-0.134699	0.162727	0.0263289	2	2	2	2	40	30	29	38	50	45	48	48	2	2
722577.54-2995047.97	3G-LH6398	3G-LH	2011	2012	2013	2014	6398	6398	CP	CB	Alive	Alive	Alive	Alive				0	0	0	0	34	34	32	37	0	-2	5	1.54407	1.54407	1.51851	1.57978	0	-0.0255541	0.0612697	2	2	2	2	49	9	36	28	53	48	45	48	1	0
722571.37-2995045.30	3G-LH6399	3G-LH	2011	2012	2013		6399	6399	CP	CB	Alive	Alive	Dead					0	0	1		9	15			6			1	1.20412			0.20412			1	2			26	24			33	20			0
722576.18-2995046.43	3G-LH6400	3G-LH		2012	2013	2014	6400	6400	CP	CB		Alive	Alive	Dead	1				0	0	1		3	4			1			0.60206	0.69897			0.09691			1	1			6	5			20	26			0
722542.95-2995040.79	3G-LH6401	3G-LH	2011	2012	2013	2014	6401	6401	CP	CB	Alive	Alive	Alive	Alive				0	0	0	0	151	151	159	162	0	8	3	2.18184	2.18184	2.20412	2.21219	0	0.0222764	0.00806762	3	3	3	3	48	43	44	52	56	61	64	62	5	8
722541.00-2995040.75	3G-LH6402	3G-LH	2011	2012	2013	2014	6402	6402	CP	CB	Alive	Alive	Alive	Alive				0	0	0	0	109	102	105	108	-7	3	3	2.04139	2.01284	2.02531	2.03743	-0.0285555	0.0124686	0.0121206	3	3	3	3	40	22	30	25	49	42	45	46	4	3
722540.52-2995037.90	3G-LH6403	3G-LH	2011	2012	2013	2014	6403	6403	CP	CB	Alive	Alive	Alive	Alive				0	0	0	0	198	196	200	203	-2	4	3	2.29885	2.29447	2.3032	2.30963	-0.00438685	0.00872983	0.00643411	3	3	3	3	37	36	41	38	60	60	67	61	8	10
722544.28-2995037.09	3G-LH6404	3G-LH	2011	2012	2013	2014	6404	6404	CP	CB	Alive	Alive	Alive	Alive				0	0	0	0	128	120	128	128	-8	8	0	2.11059	2.08279	2.11059	2.11059	-0.0278043	0.0278043	0	3	3	3	3	38	43	46	36	61	58	70	63	2	5
722549.09-2995035.04	3G-LH6405	3G-LH	2011	2012	2013	2014	6405	6405	CP	CB	Alive	Alive	Alive	Alive				0	0	0	0	109	105	102	110	-4	-3	8	2.04139	2.02531	2.01284	2.04532	-0.0160868	-0.0124686	0.0324858	3	3	3	3	49	33	53	32	62	60	65	60	8	8
722549.98-2995041.00	3G-LH6406	3G-LH	2011	2012	2013	2014	6406	6406	CP	CB	Alive	Alive	Alive	Alive				0	0	0	0	149	150	146	152	1	-4	6	2.17609	2.17898	2.16732	2.18469	0.00288569	-0.0116596	0.0173741	3	3	3	3	42	39	53	36	53	58	60	55	9	9
722549.00-2995042.27	3G-LH6407	3G-LH	2011	2012	2013	2014	6407	6407	CP	CB	Alive	Alive	Alive	Alive				0	0	0	0	136	140	140	144	4	0	4	2.13672	2.14922	2.14922	2.16137	0.0124985	0	0.0121489	3	3	3	3	56	43	49	26	49	48	49	43	5	9
722549.45-2995045.24	3G-LH6408	3G-LH	2011	2012	2013	2014	6408	6408	CP	CB	Alive	Alive	Alive	Alive				0	0	0	0	106	115	120	131	9	5	11	2.02938	2.06446	2.08279	2.12057	0.0350742	0.0183274	0.0377886	3	3	3	3	42	41	51	41	49	50	50	49	2	6
722551.84-2995045.03	3G-LH6409	3G-LH	2011	2012	2013	2014	6409	6409	CP	CB	Alive	Alive	Alive	Alive				0	0	0	0	183	184	184	198	1	0	14	2.26482	2.26717	2.26717	2.29885	0.00235391	0	0.0316813	3	3	3	3	66	44	42	63	63	58	64	65	13	14
722555.38-2995047.37	3G-LH6410	3G-LH	2011	2012	2013	2014	6410	6410	CP	CB	Alive	Alive	Alive	Alive				0	0	0	0	126	130	126	133	4	-4	7	2.1038	2.11727	2.1038	2.1271	0.0134676	-0.0134676	0.0233011	3	3	3	3	43	34	40	32	54	57	59	58	5	7
722556.54-2995048.18	3G-LH6411	3G-LH	2011	2012	2013	2014	6411	6411	CP	CB	Alive	Alive	Alive	Alive				0	0	0	0	160	163	161	172	3	-2	11	2.20683	2.21484	2.20952	2.23805	0.00801797	-0.00532883	0.0285311	3	3	3	3	53	48	60	51	63	60	75	63	7	7
722557.70-2995048.66	3G-LH6412	3G-LH	2011	2012	2013	2014	6412	6412	CP	CB	Alive	Alive	Alive	Alive				0	0	0	0	169	168	167	176	-1	-1	9	2.23045	2.22789	2.22531	2.24797	-0.00256222	-0.00257742	0.022664	3	3	3	3	50	37	57	41	61	58	64	62	9	8
722559.28-2995049.36	3G-LH6413	3G-LH	2011	2012	2013	2014	6413	6413	CP	CB	Alive	Alive	Alive	Alive				0	0	0	0	110	110	113	113	0	3	0	2.04532	2.04532	2.0569	2.0569	0	0.0115819	0	3	3	3	3	54	53	53	46	58	59	63	62	6	6
722563.25-2995044.98	3G-LH6414	3G-LH	2011	2012	2013	2014	6414	6414	CP	CB	Alive	Alive	Alive	Alive				0	0	0	0	110	110	100	103	0	-10	3	2.04532	2.04532	2.00432	2.01703	0	-0.0410016	0.012712	3	3	3	3	36	32	50	36	56	65	63	67	8	8
722565.12-2995047.13	3G-LH6416	3G-LH	2011	2012	2013	2014	6416	6416	CP	CB	Alive	Alive	Alive	Alive				0	0	0	0	38	40	37	40	2	-3	3	1.59106	1.61278	1.57978	1.61278	0.0217192	-0.0330003	0.0330003	2	2	2	2	40	54	31	35	52	55	59	47	1	3
722563.08-2995050.45	3G-LH6417	3G-LH	2011	2012	2013	2014	6417	6417	CP	CB	Alive	Alive	Alive	Alive				0	0	0	0	58	60	60	70	2	0	10	1.77085	1.78533	1.78533	1.85126	0.0144778	0	0.0659285	2	2	2	2	36	52	57	40	59	59	60	51	2	5
722562.92-2995051.93	3G-LH6418	3G-LH	2011	2012	2013	2014	6418	6418	CP	CB	Alive	Alive	Alive	Alive				0	0	0	0	173	176	179	186	3	3	7	2.24055	2.24797	2.25527	2.27184	0.00742402	0.00729924	0.0165691	3	3	3	3	40	45	43	30	58	60	58	60	7	9
722563.55-2995051.16	3G-LH6419	3G-LH	2011	2012	2013	2014	6419	6419	CP	CB	Alive	Alive	Alive	Alive				0	0	0	0	32	36	36	38	4	0	2	1.51851	1.5682	1.5682	1.59106	0.0496878	0	0.0228629	2	2	2	2	49	63	49	50	51	46	49	45	0	1
722563.57-2995050.49	3G-LH6420	3G-LH	2011	2012	2013	2014	6420	6420	CP	CB	Alive	Alive	Alive	Alive				0	0	0	0	22	23	20	23	1	-3	3	1.36173	1.38021	1.32222	1.38021	0.0184834	-0.0579919	0.0579919	2	2	2	2	44	52	20	30	47	42	32	38	1	2
722562.08-2995052.65	3G-LH6421	3G-LH	2011	2012	2013	2014	6421	6421	CP	CB	Alive	Alive	Alive	Alive				0	0	0	0	28	33	28	33	5	-5	5	1.4624	1.53148	1.4624	1.53148	0.0690809	-0.0690809	0.0690809	2	2	2	2	36	45	60	36	42	45	43	41	1	0
722562.15-2995050.97	3G-LH6422	3G-LH	2011	2012	2013	2014	6422	6422	CP	CB	Alive	Alive	Alive	Alive				0	0	0	0	18	22	18	21	4	-4	3	1.27875	1.36173	1.27875	1.34242	0.0829742	-0.0829742	0.0636691	2	2	2	2	29	42	40	27	38	40	36	39	0	0
722560.54-2995051.48	3G-LH6423	3G-LH	2011	2012	2013	2014	6423	6423	CP	CB	Alive	Alive	Alive	Alive				0	0	0	0	189	194	195	202	5	1	7	2.27875	2.29003	2.29226	2.3075	0.011281	0.00222146	0.01524	3	3	3	3	48	34	55	38	53	57	65	52	9	10
722560.58-2995051.34	3G-LH6424	3G-LH	2011	2012	2013	2014	6424	6424	CP	CB	Alive	Alive	Alive	Alive				0	0	0	0	32	35	32	35	3	-3	3	1.51851	1.5563	1.51851	1.5563	0.0377886	-0.0377886	0.0377886	2	2	2	2	44	42	58	43	47	49	50	48	2	5
722562.92-2995048.68	3G-LH6425	3G-LH	2011	2012	2013	2014	6425	6425	CP	CB	Alive	Alive	Alive	Alive				0	0	0	0	135	130	135	135	-5	5	0	2.13354	2.11727	2.13354	2.13354	-0.0162676	0.0162676	0	3	3	3	3	45	35	50	40	52	66	56	62	7	7
722562.16-2995052.52	3G-LH6426	3G-LH	2011	2012	2013	2014	6426	6426	CP	CB	Alive	Alive	Alive	Dead				0	0	0	1	17	19	15		2	-4		1.25527	1.30103	1.20412		0.0457575	-0.09691		2	2	2		33	20	34		41	27	36		0	0
722562.29-2995052.74	3G-LH6427	3G-LH	2011	2012	2013	2014	6427	6427	CP	CB	Alive	Alive	Alive	Alive				0	0	0	0	42	41	41	42	-1	0	1	1.63347	1.62325	1.62325	1.63347	-0.0102192	0	0.0102192	2	2	2	2	29	35	21	27	38	43	40	41	1	4
722562.21-2995053.37	3G-LH6428	3G-LH	2011	2012	2013	2014	6428	6428	CP	CB	Alive	Alive	Alive	Alive				0	0	0	0	31	32	30	30	1	-2	0	1.50515	1.51851	1.49136	1.49136	0.013364	-0.0271522	0	2	2	2	2	31	30	55	30	46	50	47	40	1	0
722562.02-2995053.15	3G-LH6429	3G-LH	2011	2012	2013	2014	6429	6429	CP	CB	Alive	Alive	Alive	Alive				0	0	0	0	57	58	60	64	1	2	4	1.76343	1.77085	1.78533	1.81291	0.00742402	0.0144778	0.0275835	2	2	2	2	41	45	51	37	49	48	51	50	3	6
722563.57-2995053.82	3G-LH6430	3G-LH	2011	2012	2013	2014	6430	6430	CP	CB	Alive	Alive	Alive	Alive				0	0	0	0	14	16	14	16	2	-2	2	1.17609	1.23045	1.17609	1.23045	0.0543577	-0.0543577	0.0543577	2	2	2	2	24	46	12	20	38	39	30	35	0	2
722564.08-2995052.23	3G-LH6431	3G-LH	2011	2012	2013	2014	6431	6431	CP	CB	Alive	Alive	Alive	Alive				0	0	0	0	48	53	52	50	5	-1	-2	1.6902	1.73239	1.72428	1.70757	0.0421977	-0.00811789	-0.0167057	2	2	2	2	32	36	40	28	51	58	58	47	3	5
722561.08-2995053.48	3G-LH6433	3G-LH	2011	2012	2013	2014	6433	6433	CP	CB	Alive	Alive	Alive	Alive				0	0	0	0	44	46	36	45	2	-10	9	1.65321	1.6721	1.5682	1.66276	0.0188853	-0.103896	0.0945561	2	2	2	2	49	53	61	43	55	45	46	47	0	0
722564.37-2995053.96	3G-LH6434	3G-LH	2011	2012	2013	2014	6434	6434	CP	CB	Alive	Alive	Alive	Alive				0	0	0	0	57	57	52	55	0	-5	3	1.76343	1.76343	1.72428	1.74819	0	-0.0391521	0.0239122	2	2	2	2	67	44	31	45	65	62	68	59	3	5
722579.44-2995051.74	3G-LH6435	3G-LH	2011	2012	2013	2014	6435	6435	CP	CB	Alive	Alive	Alive	Alive				0	0	0	0	78	80	77	78	2	-3	1	1.89763	1.90849	1.89209	1.89763	0.0108579	-0.0163904	0.00553249	2	2	2	2	32	38	48	26	53	46	55	48	1	2
722579.63-2995050.53	3G-LH6436	3G-LH	2011	2012	2013	2014	6436	6436	CP	CB	Alive	Alive	Alive	Alive				0	0	0	0	20	22	20	21	2	-2	1	1.32222	1.36173	1.32222	1.34242	0.0395085	-0.0395085	0.0202034	2	2	2	2	47	49	52	23	49	56	57	49	0	2
722583.03-2995049.17	3G-LH6437	3G-LH	2011	2012	2013	2014	6437	6437	CP	CB	Alive	Alive	Alive	Alive				0	0	0	0	395	400	400	400	5	0	0	2.5977	2.60314	2.60314	2.60314	0.00544919	0	0	4	4	4	4	50	26		37	52	47		47	21	13
722583.51-2995049.05	3G-LH6438	3G-LH		2012	2013	2014	6438	6438	CP	CB		Alive	Unknown	NSE	1				0	1			0							0							1				3				36				0
722583.40-2995048.65	3G-LH6439	3G-LH		2012	2013	2014	6439	6439	CP	CB		Alive	Unknown	NSE	1				0	1			0							0							1				4				32				0
722583.38-2995050.28	3G-LH6440	3G-LH		2012	2013	2014	6440	6440	CP	CB		Alive	Unknown	NSE	1				0	1			0							0							1				3				41				0
722581.54-2995047.96	3G-LH6441	3G-LH	2011	2012	2013	2014	6441	6441	CP	CB	Alive	Alive	Alive	Alive				0	0	0	0	22	24	27	27	2	3	0	1.36173	1.39794	1.44716	1.44716	0.0362122	0.049218	0	2	2	2	2	42	47	40	33	50	48	50	41	2	1
722584.68-2995044.69	3G-LH6442	3G-LH	2011	2012	2013	2014	6442	6442	CP	CB	Alive	Alive	Alive	Alive				0	0	0	0	30	32	26	28	2	-6	2	1.49136	1.51851	1.43136	1.4624	0.0271522	-0.0871502	0.0310342	2	2	2	2	56	59	41	36	59	54	60	50	2	2
722581.91-2995051.22	3G-LH6443	3G-LH	2011	2012	2013	2014	6443	6443	CP	CB	Alive	Alive	Alive	Alive				0	0	0	0	17	19	17	18	2	-2	1	1.25527	1.30103	1.25527	1.27875	0.0457575	-0.0457575	0.0234811	2	2	2	2	49	40	39	25	52	45	52	45	4	3
722582.64-2995050.58	3G-LH6444	3G-LH	2011	2012	2013	2014	6444	6444	CP	CB	Alive	Alive	Alive	Alive				0	0	0	0	27	30	31	30	3	1	-1	1.44716	1.49136	1.50515	1.49136	0.0442037	0.0137883	-0.0137883	2	2	2	2	49	49	52	34	53	53	62	50	2
722580.21-2995054.34	3G-LH6445	3G-LH	2011	2012	2013	2014	6445	6445	CP	CB	Alive	Alive	Alive	Alive				0	0	0	0	13	14	14	13	1	0	-1	1.14613	1.17609	1.17609	1.14613	0.0299632	0	-0.0299632	2	2	2	2	60	46	39	35	54	42	36	68	0	0
722576.60-2995055.27	3G-LH6446	3G-LH	2011	2012	2013	2014	6446	6446	CP	CB	Alive	Alive	Alive	Alive				0	0	0	0	32	28	27	27	-4	-1	0	1.51851	1.4624	1.44716	1.44716	-0.0561159	-0.01524	0	2	2	2	2	52	38	42	34	41	44	44	40	2	4
722574.98-2995055.90	3G-LH6447	3G-LH	2011	2012	2013	2014	6447	6447	CP	CB	Alive	Alive	Alive	Alive				0	0	0	0	18	16	17	12	-2	1	-5	1.27875	1.23045	1.25527	1.11394	-0.0483047	0.0248236	-0.141329	2	2	2	2	49	44	45	31	47	46	43	45	0	0
722575.87-2995053.46	3G-LH6448	3G-LH	2011	2012	2013	2014	6448	6448	CP	CB	Alive	Alive	Alive	Alive				0	0	0	0	24	24	21	23	0	-3	2	1.39794	1.39794	1.34242	1.38021	0	-0.0555173	0.0377886	2	2	2	2	41	53	73	19	54	57	43	17	0	0
722577.11-2995053.74	3G-LH6449	3G-LH	2011	2012	2013	2014	6449	6449	CP	CB	Alive	Alive	Alive	Alive				0	0	0	0	102	105	110	110	3	5	0	2.01284	2.02531	2.04532	2.04532	0.0124686	0.0200171	0	3	3	3	3	52	50	67	58	62	65	69	60	6	6
722571.60-2995050.21	3G-LH6450	3G-LH	2011	2012	2013	2014	6450	6450	CP	CB	Alive	Alive	Alive	Alive				0	0	0	0	38	34	33	35	-4	-1	2	1.59106	1.54407	1.53148	1.5563	-0.0469966	-0.0125891	0.0248236	2	2	2	2	46	38	44	30	55	48	53	47	2	3
722573.07-2995049.01	3G-LH6451	3G-LH	2011	2012	2013	2014	6451	6451	CP	CB	Alive	Alive	Alive	Alive				0	0	0	0	39	34	36	35	-5	2	-1	1.60206	1.54407	1.5682	1.5563	-0.0579919	0.0241337	-0.0118992	2	2	2	2	51	54	42	37	54	50	57	55	2	3
722572.48-2995052.74	3G-LH6452	3G-LH	2011	2012	2013	2014	6452	6452	CP	CB	Alive	Alive	Alive	Alive				0	0	0	0	120	120	117	120	0	-3	3	2.08279	2.08279	2.07188	2.08279	0	-0.0109034	0.0109034	3	3	3	3	29	25	52	32	51	49	52	50	7	6
722574.42-2995054.08	3G-LH6453	3G-LH	2011	2012	2013	2014	6453	6453	CP	CB	Alive	Alive	Alive	Alive				0	0	0	0	30	22	33	33	-8	11	0	1.49136	1.36173	1.53148	1.53148	-0.129634	0.169751	0	2	2	2	2	34	50	34	24	48	46	43	45	0	2
722576.33-2995052.09	3G-LH6454	3G-LH	2011	2012	2013	2014	6454	6454	CP	CB	Alive	Alive	Alive	NSE				0	0	0		7.5	6	0		-1.5			0.929419	0.845098	0		-0.0843209			1	1	1		19	9	12		32	20	25		0	0
722574.98-2995050.77	3G-LH6455	3G-LH		2012	2013	2014	6455	6455	CP	CB		Alive	Unknown	NSE	1				0	1			0							0							1				1				38				0
722574.89-2995051.14	3G-LH6456	3G-LH	2011	2012	2013	2014	6456	6456	CP	CB	Alive	Alive	Alive	Alive				0	0	0	0	21	25	24	19	4	-1	-5	1.34242	1.41497	1.39794	1.30103	0.0725507	-0.0170333	-0.09691	2	2	2	2	36	56	37	30	54	45	38	40	0	2
722574.18-2995051.20	3G-LH6457	3G-LH		2012	2013	2014	6457	6457	CP	CB		Alive	Alive	Alive					0	0	0		13	11	11		-2	0		1.14613	1.07918	1.07918		-0.0669468	0		2	2	2		46	42	33		45	44	50		0
722574.47-2995053.43	3G-LH6458	3G-LH	2011	2012	2013	2014	6458	6458	CP	CB	Alive	Alive	Alive	Alive				0	0	0	0	21	23	20	23	2	-3	3	1.34242	1.38021	1.32222	1.38021	0.0377886	-0.0579919	0.0579919	2	2	2	2	53	56	62	55	55	52	55	48	0	2
722574.51-2995051.13	3G-LH6459	3G-LH		2012	2013	2014	6459	6459	CP	CB		Alive	Alive	Alive					0	0	0		23	26	23		3	-3		1.38021	1.43136	1.38021		0.0511525	-0.0511525		2	2	2		62	56	54		48	48	45		0
722574.70-2995051.39	3G-LH6460	3G-LH	2011	2012	2013	2014	6460	6460	CP	CB	Alive	Alive	Alive	Alive				0	0	0	0	71	72	71	74	1	-1	3	1.85733	1.86332	1.85733	1.87506	0.00599036	-0.00599036	0.0177288	2	2	2	2	43	44	34	45	54	55	54	56	4	4
722575.25-2995051.20	3G-LH6461	3G-LH	2011	2012	2013	2014	6461	6461	CP	CB	Alive	Alive	Alive	Alive				0	0	0	0	40	46	41	49	6	-5	8	1.61278	1.6721	1.62325	1.69897	0.059314	-0.0488486	0.0757207	2	2	2	2	54	60	38	36	46	46	47	45	3	3
722577.79-2995051.55	3G-LH6462	3G-LH	2011	2012	2013	2014	6462	6462	CP	CB	Alive	Alive	Alive	Alive				0	0	0	0	70	72	73	74	2	1	1	1.85126	1.86332	1.86923	1.87506	0.0120645	0.00590886	0.00582954	2	2	2	2	36	49	56	50	49	55	54	51	3	4
722576.33-2995051.81	3G-LH6463	3G-LH	2011	2012	2013	2014	6463	6463	CP	CB	Alive	Alive	Alive	Alive				0	0	0	0	78	79	79	86	1	0	7	1.89763	1.90309	1.90309	1.93952	0.0054629	0	0.0364293	2	2	2	2	52	59	62	48	58	58	59	50	1	4
722576.59-2995033.33	3G-LH6581	3G-LH	2011	2012	2013	2014	6581	6581	CP	CB	Alive	Alive	Alive	Alive				0	0	0	0	240	240	237	260	0	-3	23	2.38202	2.38202	2.37658	2.41664	0	-0.00544009	0.0400636	3	3	3	4			60	42			76	70	0	22
722574.09-2995035.11	3G-LH6582	3G-LH	2011	2012	2013	2014	6582	6582	CP	CB	Alive	Alive	Alive	Alive				0	0	0	0	110	110	106	106	0	-4	0	2.04532	2.04532	2.02938	2.02938	0	-0.0159392	0	3	3	3	3	0	41	54	41		60	65	56	0	6
722574.34-2995036.53	3G-LH6583	3G-LH	2011	2012	2013	2014	6583	6583	CP	CB	Alive	Alive	Alive	Alive				0	0	0	0	140	140	144	145	0	4	1	2.14922	2.14922	2.16137	2.16435	0	0.0121489	0.00298485	3	3	3	3		59	47	37		61	62	52	0	9
722567.66-2995049.38	3G-LH6585	3G-LH	2011	2012	2013	2014	6585	6585	CP	CB	Alive	Alive	Alive	Alive				0	0	0	0	35	38	34	30	3	-4	-4	1.5563	1.59106	1.54407	1.49136	0.0347621	-0.0469966	-0.0527064	2	2	2	2	52	50	42	45	51	52	54	50	1	2
722542.61-2995060.67	3G-LH6587	3G-LH	2011	2012	2013	2014	6587	6587	CP	CB	Alive	Alive	Alive	Alive				0	0	0	0	3	7	6	6	4	-1	0	0.60206	0.90309	0.845098	0.845098	0.30103	-0.0579919	0	1	1	1	1	33	41	35	29	38	39	37	35	0	0
722566.01-2995049.02	3G-LH6588	3G-LH	2011	2012	2013	2014	6588	6588	CP	CB	Alive	Alive	Alive	NSE				0	0	0		89	87	95		-2	8		1.95424	1.94448	1.98227		-0.00975984	0.0377886		2	2	2		24	34	53		46	54	58		4	4
722544.95-2995012.13	2G-HH6464	2G-HH		2012	2013	2014	6464	6464	CP	CA		Alive	Alive	Alive					0	0	0		29	20	26		-9	6		1.47712	1.32222	1.43136		-0.154902	0.109144		2	2	2		48	79	38		45	49	49		0
722510.64-2995006.61	2G-HH6465	2G-HH	2011	2012	2013	2014	6465	6465	CP	CA	Alive	Alive	Alive	Dead				0	0	0	1	32	26	28		-6	2		1.51851	1.43136	1.4624		-0.0871502	0.0310342		2	2	2			54	26			36	46			0
722511.02-2995006.29	2G-HH6466	2G-HH	2011	2012	2013	2014	6466	6466	CP	CA	Alive	Alive	Alive	Alive				0	0	0	0	4	6	4	5	2	-2	1	0.69897	0.845098	0.69897	0.778151	0.146128	-0.146128	0.0791812	2	2	2	2		28	5	7		35	26	30		0
722509.81-2995005.86	2G-HH6467	2G-HH	2011	2012	2013	2014	6467	6467	CP	CA	Alive	Alive	Alive	Alive				0	0	0	0	12	14	13	14	2	-1	1	1.11394	1.17609	1.14613	1.17609	0.0621479	-0.0299632	0.0299632	2	2	2	2		48	26	34		42	37	46		0
722510.12-2995008.36	2G-HH6468	2G-HH	2011	2012	2013	2014	6468	6468	CP	CA	Alive	Alive	Alive	Alive				0	0	0	0	97	96	100	97	-1	4	-3	1.99123	1.98677	2.00432	1.99123	-0.00445434	0.0175496	-0.0130953	2	2	3	2		42	46	27		50	51	43		5
722508.63-2995006.78	2G-HH6469	2G-HH	2011	2012	2013	2014	6469	6469	CP	CA	Alive	Alive	Alive	Alive				0	0	0	0	31	33	32	30	2	-1	-2	1.50515	1.53148	1.51851	1.49136	0.0263289	-0.012965	-0.0271522	2	2	2	2		46	18	25		42	43	40		0
722509.12-2995008.11	2G-HH6470	2G-HH	2011	2012	2013	2014	6470	6470	CP	CA	Alive	Alive	Alive	Alive				0	0	0	0	9	11	8	9	2	-3	1	1	1.07918	0.954243	1	0.0791812	-0.124939	0.0457575	1	2	1	1		36	22	23		50	37	50		0
722504.10-2994982.76	2G-HH6473	2G-HH	2011	2012	2013	2014	6473	6473	CP	CA	Alive	Alive	Dead	Dead				0	0	1		305	310			5			2.48572	2.49276			0.00703896			4	4			60				68				13
722495.75-2994983.80	2G-HH6475	2G-HH	2011	2012	2013	2014	6475	6475	CP	CA	Alive	Alive	Alive	Alive				0	0	0	0	220	223	220	225	3	-3	5	2.34439	2.35025	2.34439	2.35411	0.00585574	-0.00585574	0.00971617	3	3	3	3	60	41	50	40	75	75	75	63	16	16
	1G-UH6475	1G-UH				2014	6475		CP	SC				Alive							0				40							1.61278							2				-				-
722495.78-2994989.01	2G-HH6476	2G-HH	2011	2012	2013	2014	6476	6476	CP	CA	Alive	Alive	Alive	Alive				0	0	0	0	480	470	472	490	-10	2	18	2.68215	2.67302	2.67486	2.69108	-0.00912417	0.00184023	0.0162204	4	4	4	4	75	45	38	63	60	59	59	53	0	31
722501.35-2994988.80	2G-HH6477	2G-HH	2011	2012	2013	2014	6477	6477	CP	CA	Alive	Alive	Alive	Alive				0	0	0	0	235	250	247	255	15	-3	8	2.37291	2.39967	2.39445	2.40824	0.0267617	-0.00522204	0.0137883	3	4	3	4	55	50	51	38	58	63	60	55	22	19
722501.52-2994990.61	2G-HH6478	2G-HH	2011	2012	2013	2014	6478	6478	CP	CA	Alive	Alive	Alive	Alive				0	0	0	0	270	274	272	278	4	-2	6	2.43297	2.43933	2.43616	2.4456	0.0063634	-0.00317005	0.00944156	4	4	4	4	55	38	39	47	50	46	49	53	7	13
722506.59-2994997.29	2G-HH6479	2G-HH	2011	2012	2013	2014	6479	6479	CP	CA	Alive	Alive	Alive	Alive				0	0	0	0	309	310	306	313	1	-4	7	2.49136	2.49276	2.48714	2.49693	0.0013987	-0.00562201	0.00979127	4	4	4	4	50	35	47	46	68	54	58	45	14	10
722508.09-2994993.26	2G-HH6481	2G-HH	2011	2012	2013	2014	6481	6481	CP	CA	Alive	Alive	Alive	Alive				0	0	0	0	270	260	253	277	-10	-7	24	2.43297	2.41664	2.40483	2.44404	-0.0163288	-0.0118068	0.0392111	4	4	4	4	50	33	40	34	55	52	48	49	13	10
722510.40-2994980.19	2G-HH6482	2G-HH	2011	2012	2013	2014	6482	6482	CP	CA	Alive	Alive	Alive	Alive				0	0	0	0	245	257	256	272	12	-1	16	2.39094	2.41162	2.40993	2.43616	0.0206846	-0.00168658	0.0262295	3	4	4	4	80	56	49	48	59	54	55	40	21	13
722517.61-2994978.53	2G-HH6484	2G-HH	2011	2012	2013	2014	6484	6484	CP	CA	Alive	Alive	Alive	Alive				0	0	0	0	228	235	230	239	7	-5	9	2.35984	2.37291	2.36361	2.38021	0.0130765	-0.00930002	0.0165993	3	3	3	3	48	52	40	34	56	52	49	53	14	10
722525.02-2994971.97	2G-HH6486	2G-HH	2011	2012	2013	2014	6486	6486	CP	CA	Alive	Alive	Alive	Alive				0	0	0	0	285	298	300	300	13	2	0	2.45637	2.47567	2.47857	2.47857	0.0193052	0.00289531	0	4	4	4	4	48	40	33	35	75	49	50	65	9	7
722525.78-2994968.48	1G-UH6487	1G-UH	2011	2012	2013	2014	6487	6487	CP	SC	Alive	Alive	Alive	Alive				0	0	0	0	300	310	310	313	10	0	3	2.47857	2.49276	2.49276	2.49693	0.0141939	0	0.00416926	4	4	4	4	58	50	68	84	55	66	71	79	0	0
722527.08-2994973.12	2G-HH6488	2G-HH	2011	2012	2013	2014	6488	6488	CP	CA	Alive	Alive	Alive	Alive				0	0	0	0	201	200	200	209	-1	0	9	2.30535	2.3032	2.3032	2.32222	-0.00215531	0	0.0190232	3	3	3	3	49	28	48	36	65	57	55	63	7	13
722547.72-2994980.33	2G-HH6489	2G-HH	2011	2012	2013	2014	6489	6489	CP	CA	Alive	Alive	Alive	Alive				0	0	0	0	207	220	232	240	13	12	8	2.31806	2.34439	2.36736	2.38202	0.0263289	0.0229636	0.0146611	3	3	3	3	92	98	74	61	85	62	59	65	18	18
722546.35-2994980.83	2G-HH6491	2G-HH	2011	2012	2013	2014	6491	6491	CP	CA	Alive	Alive	Alive	Alive				0	0	0	0	312	338	338	350	26	0	12	2.49554	2.5302	2.5302	2.54531	0.0346554	0	0.0151074	4	4	4	4	55	55	34	45	75	57	55	55	22	23
722541.29-2994978.27	2G-HH6492	2G-HH	2011	2012	2013	2014	6492	6492	CP	CA	Alive	Alive	Alive	Alive				0	0	0	0	307	298	307	320	-9	9	13	2.48855	2.47567	2.48855	2.50651	-0.0128795	0.0128795	0.0179543	4	4	4	4	55	40	40	31	60	50	54	43	10	11
722539.60-2994970.96	2G-HH6493	2G-HH	2011	2012	2013	2014	6493	6493	CP	CA	Alive	Alive	Alive	Alive				0	0	0	0	219	230	230	250	11	0	20	2.34242	2.36361	2.36361	2.39967	0.0211893	0	0.0360617	3	3	3	4	49	39	35	26	75	63	35	58	10	14
722540.63-2994975.23	2G-HH6495	2G-HH	2011	2012	2013	2014	6495	6495	CP	CA	Alive	Alive	Alive	Alive				0	0	0	0	226	220	220	220	-6	0	0	2.35603	2.34439	2.34439	2.34439	-0.0116336	0	0	3	3	3	3	54	32	40	40	65	55	53	60		6
722538.66-2994972.31	2G-HH6496	2G-HH	2011	2012	2013	2014	6496	6496	CP	CA	Alive	Alive	Alive	Alive				0	0	0	0		245	245	260		0	15		2.39094	2.39094	2.41664		0	0.0257054		3	3	4	55	40	55	40	74	70	74	62	9	14
722537.69-2994969.27	2G-HH6497	2G-HH	2011	2012	2013	2014	6497	6497	CP	CA	Alive	Alive	Alive	Alive				0	0	0	0	167	170	165	160	3	-5	-5	2.22531	2.233	2.22011	2.20683	0.00768683	-0.012888	-0.0132822	3	3	3	3	65	38	45	36	58	63	62	60	5	6
722537.14-2994970.19	2G-HH6499	2G-HH	2011	2012	2013	2014	6499	6499	CP	CA	Alive	Alive	Alive	Alive				0	0	0	0	264	280	277	285	16	-3	8	2.42325	2.44871	2.44404	2.45637	0.0254604	-0.00466152	0.0123212	4	4	4	4	58	55	44	55	72	55	49	55		15
722520.20-2994952.83	1G-UH6506	1G-UH	2011	2012	2013	2014	6506	6506	CP	SC	Alive	Alive	Alive	Alive				0	0	0	0	35	37	34	40	2	-3	6	1.5563	1.57978	1.54407	1.61278	0.0234811	-0.0357156	0.0687158	2	2	2	2	67	88	23	80	51	45	62	45	0	0
722495.29-2994978.52	1G-UH6508	1G-UH	2011	2012	2013	2014	6508	6508	CP	SC	Alive	Alive	Alive	Alive				0	0	0	0	8	10	7	5	2	-3	-2	0.954243	1.04139	0.90309	0.778151	0.0871502	-0.138303	-0.124939	1	2	1	1	10	15	6	6	34	25	30	43	0	0
722539.19-2995052.7	3G-LH6588	3G-LH	2011	2012	2013	2014	6588	6588	CP	CB	Alive	Alive	Alive	NSE				0	0	0		1	1	0		0			0.30103	0.30103	0		0			1	1	1		1	2	4		45	29	33		0	0
722528.61-2994985.32	2G-HH6553	2G-HH	2011	2012	2013	2014	6553	6553	CP	CA	Alive	Alive	Alive	Alive				0	0	0	0	235	238	232	237	3	-6	5	2.37291	2.3784	2.36736	2.37658	0.0054859	-0.011042	0.00922104	3	3	3	3	54	80		33	55	65		57	16	10
722532.54-2995004.11	2G-HH6554	2G-HH	2011	2012	2013	2014	6554	6554	CP	CA	Alive	Alive	Unknown	Dead				0	0	1		22	23			1			1.36173	1.38021			0.0184834			2	2				38				44			2	4
722537.05-2994998.51	2G-HH6555	2G-HH	2011	2012	2013	2014	6555	6555	CP	CA	Alive	Alive	Alive	Alive				0	0	0	0	44	44	49	49	0	5	0	1.65321	1.65321	1.69897	1.69897	0	0.0457575	0	2	2	2	2	46	40	50	31	50	49	58	53	2	1
722539.57-2994997.55	2G-HH6556	2G-HH	2011	2012	2013	2014	6556	6556	CP	CA	Alive	Alive	Alive	Alive				0	0	0	0	25	33	33	30	8	0	-3	1.41497	1.53148	1.53148	1.49136	0.116506	0	-0.0401172	2	2	2	2	0	41	28	17		43	43	27	0	0
722539.76-2994996.94	2G-HH6557	2G-HH	2011	2012	2013	2014	6557	6557	CP	CA	Alive	Alive	Alive	NSE				0	0	0		10	13	16		3	3		1.04139	1.14613	1.23045		0.104735	0.0843209		2	2	2		15	23	25		43	35	30		0	0
722553.04-2995066.49	3G-LH6590	3G-LH	2011	2012	2013	2014	6590	6590	CP	CB	Alive	Alive	Alive	NSE				0	0	0		5	3	3		-2	0		0.778151	0.60206	0.60206		-0.176091	0		1	1	1		26	35	27		38	33	36		0	0
722550.82-2995066.07	3G-LH6592	3G-LH	2011	2012	2013		6592	6592	CP	CB	Alive	Alive	Dead					0	0	1		2	1			-1			0.477121	0.30103			-0.176091			1	1			1	1			13	34			0	0
722556.20-2995053.49	3G-LH6593	3G-LH	2011	2012	2013	2014	6593	6593	CP	CB	Alive	Alive	Alive	Alive				0	0	0	0	100	100	93	91	0	-7	-2	2.00432	2.00432	1.97313	1.96379	0	-0.0311935	-0.00934003	3	3	2	2	38	33	59	24	49	54	61	48	5	6
722553.61-2995054.33	3G-LH6594	3G-LH	2011	2012	2013	2014	6594	6594	CP	CB	Alive	Alive	Alive	Alive				0	0	0	0	147	139	140	140	-8	1	0	2.17026	2.14613	2.14922	2.14922	-0.0241337	0.00309108	0	3	3	3	3	39	32	71	31	55	51	61	52	6	7
722581.29-2995052.55	3G-LH6596	3G-LH	2011	2012	2013	2014	6596	6596	CP	CB	Alive	Alive	Alive	Alive				0	0	0	0	28	33	36	36	5	3	0	1.4624	1.53148	1.5682	1.5682	0.0690809	0.0367228	0	2	2	2	2	52	50	51	33	50	50	53	50	0	1
722560.46-2995059.27	3G-LH6598	3G-LH	2011	2012	2013	2014	6598	6598	CP	CB	Alive	Alive	Alive	Alive				0	0	0	0	96	105	100	105	9	-5	5	1.98677	2.02531	2.00432	2.02531	0.0385341	-0.0209845	0.0209845	2	3	3	3	35	39	42	35	54	53	58	50	4	7
722582.94-2995052.17	3G-LH6599	3G-LH	2011	2012	2013	2014	6599	6599	CP	CB	Alive	Alive	Alive	Alive				0	0	0	0	310	320	316	340	10	-4	24	2.49276	2.50651	2.50106	2.53275	0.0137446	-0.00544577	0.0316951	4	4	4	4		60	70	40		67	61	60	0	23
722583.94-2995048.70	3G-LH6600	3G-LH	2011	2012	2013	2014	6600	6600	CP	CB	Alive	Alive	Alive	Alive				0	0	0	0	666	670	670	665	4	0	-5	2.82413	2.82672	2.82672	2.82347	0.00259669	0	-0.00324829	4	4	4	4		92	89	60		89	73	70		16
	3G-LH1510	3G-LH				2014	1510		CP	CB				Dead
	3G-LH1511	3G-LH				2014	1511		CP	CB				Alive							0				25							1.41497							2				48				55
	3G-LH5175	3G-LH				2014	5175		CP	CB				Alive							0				10							1.04139							2				18				26
	3G-LH6520	3G-LH				2014	6520		CP	CB				Alive							0				1							0.30103							1				2				16
	3G-LH6584	3G-LH				2014	6584		CP	CB				Alive							0				90							1.95904							2				40				54
			Row Labels	Count of LT14
			1G-UH	183
			2G-HH	179
			3G-LH	216
			4UG-HH	260
			5UG-LH	180
			6UG-UH	176
			Grand Total	1194
[truncated: 56 more columns]
